# Supplementary material
Source: PubMed Central journal article supplement (PMC6003371)

# AgCo

## Ag

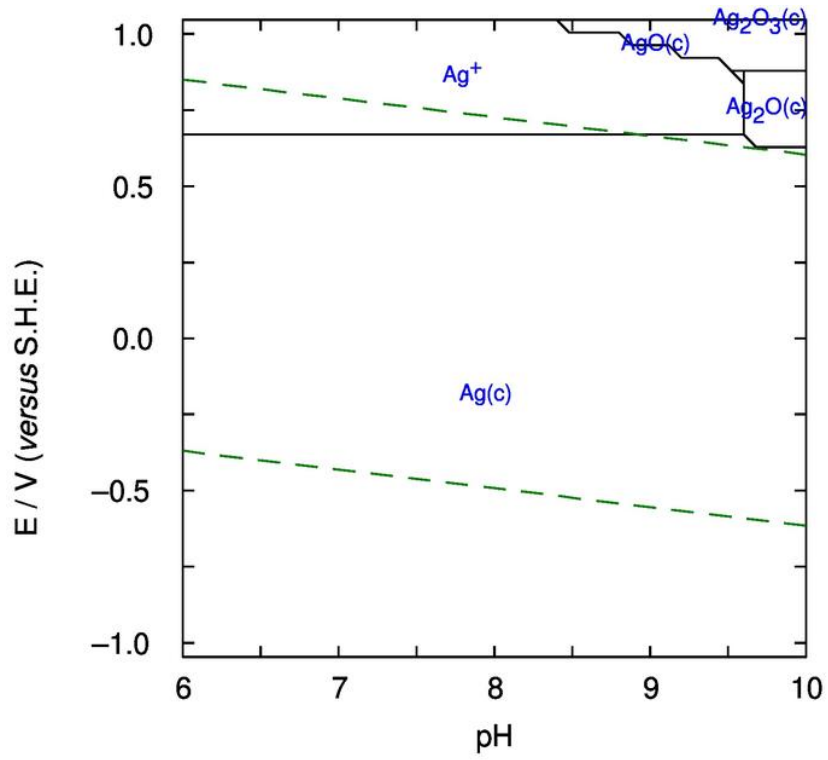

## Co

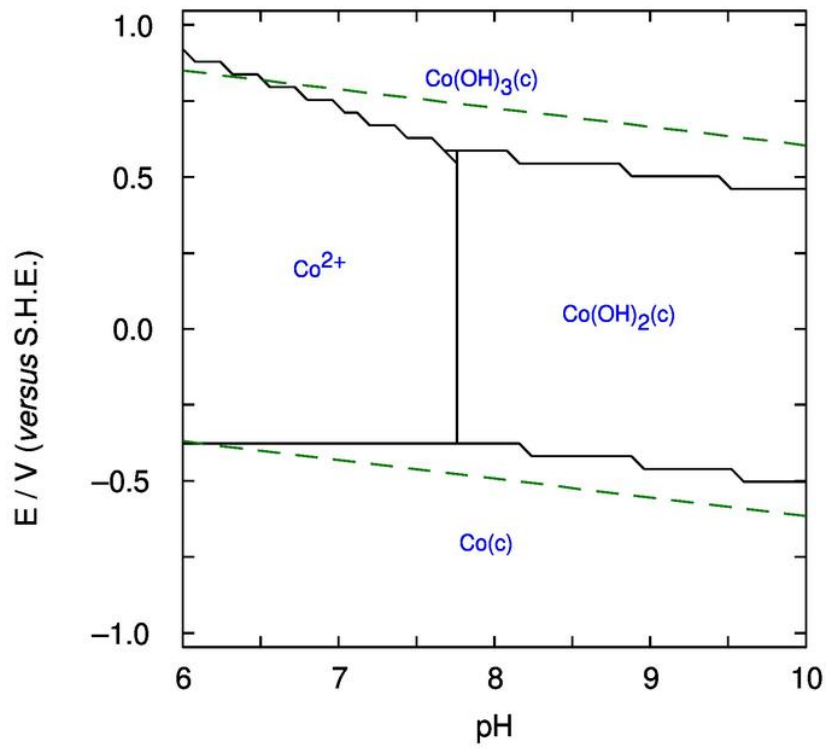

# AgCu

## Ag

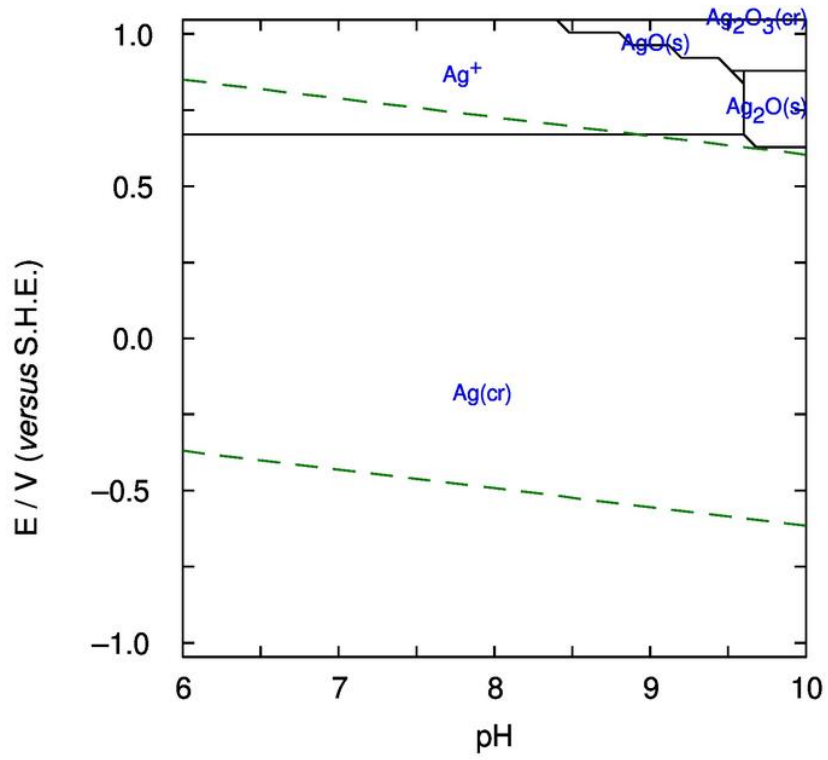

## Cu

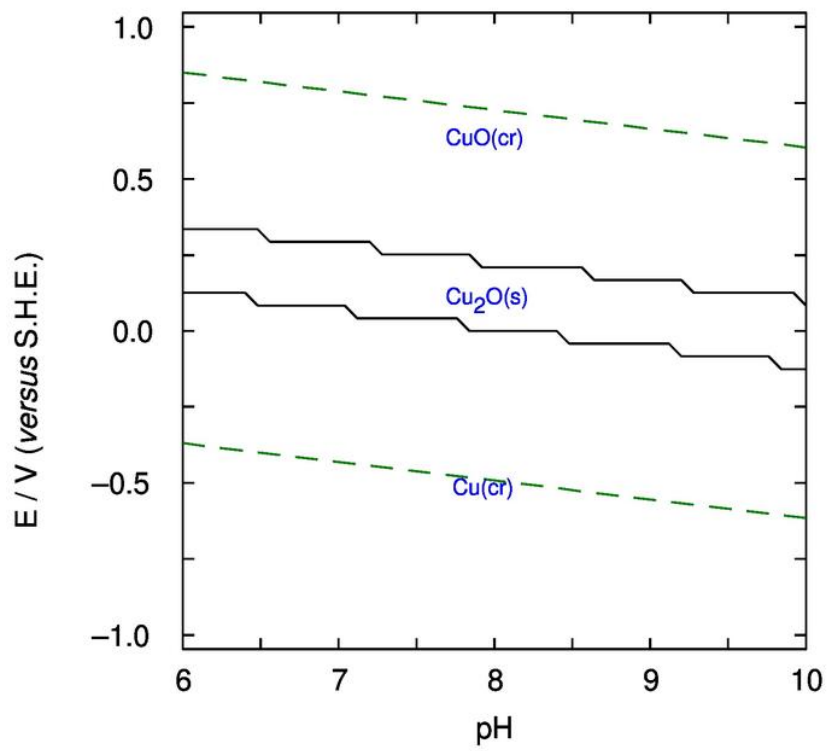

# AgFe

## Ag



## Fe

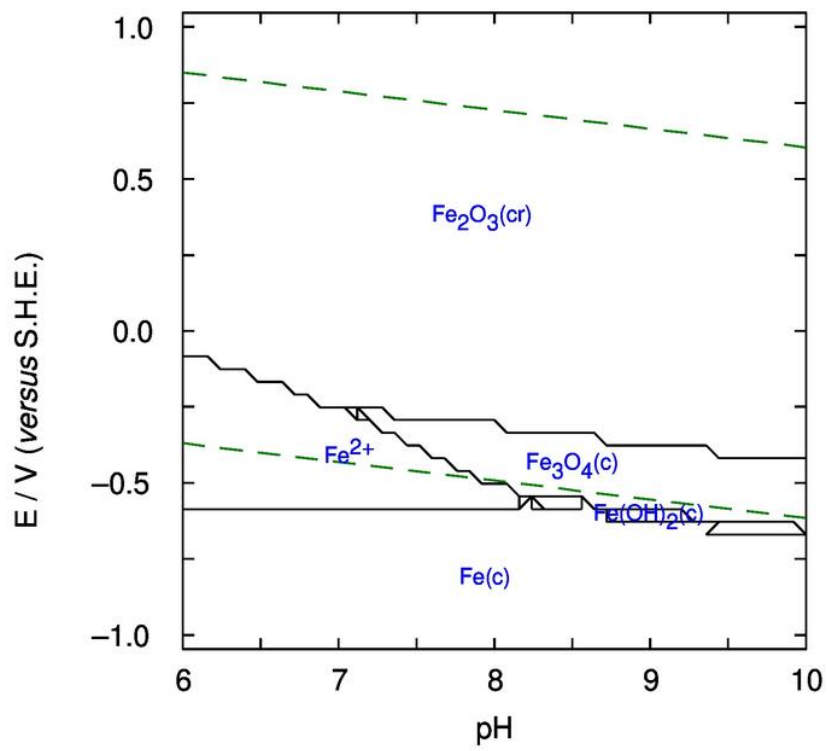

# AgMn

## Ag



## Mn

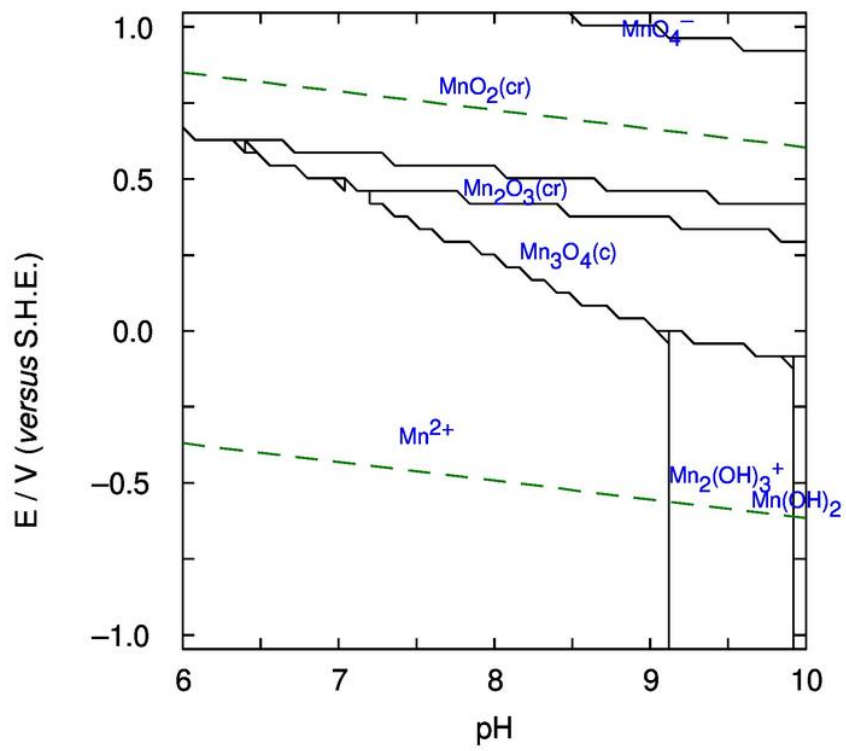

# AgNi

## Ag

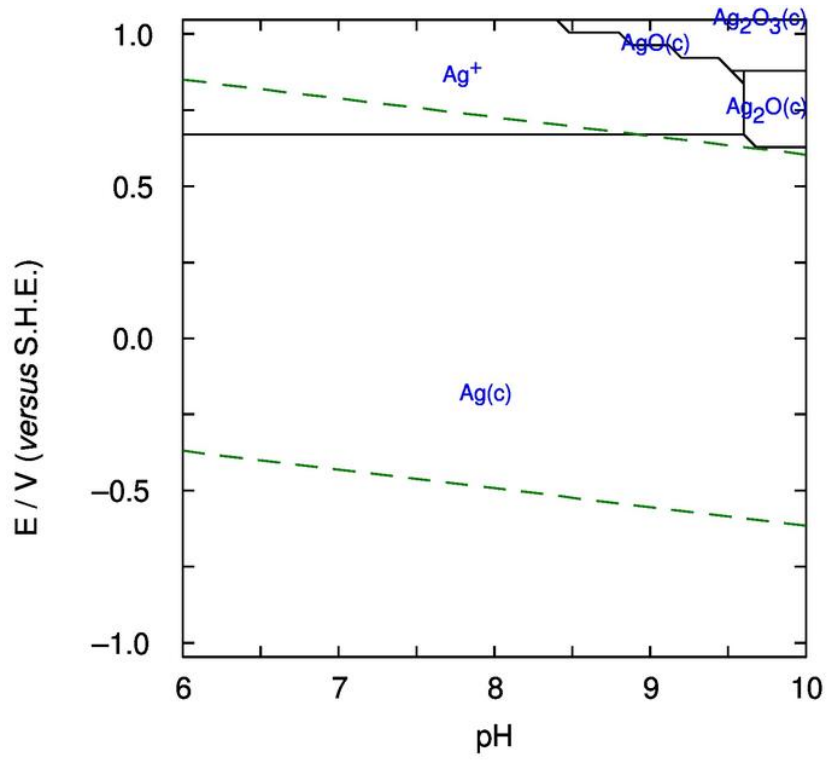

## Ni

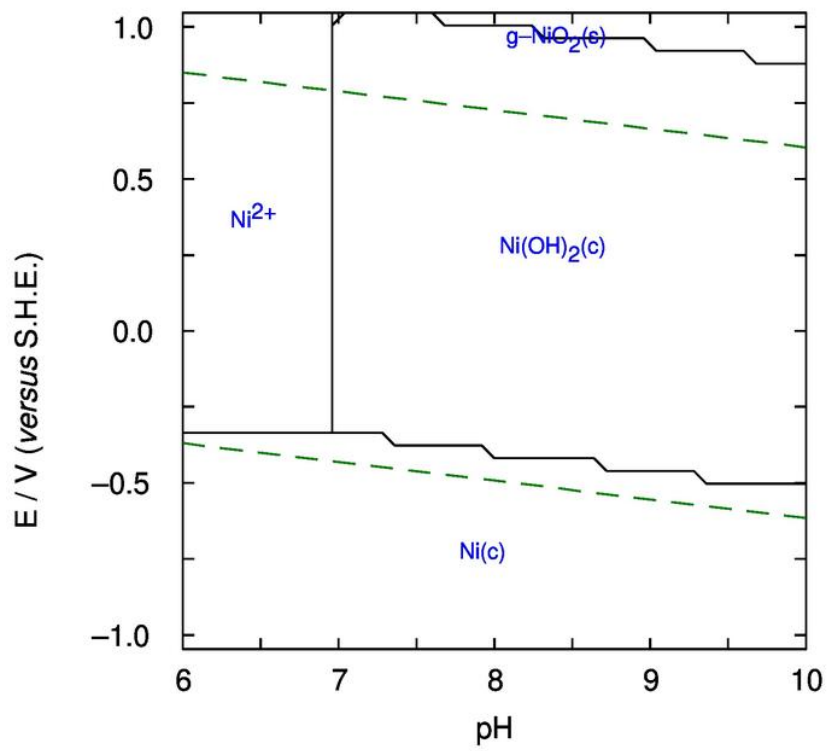

# AgS

## Ag

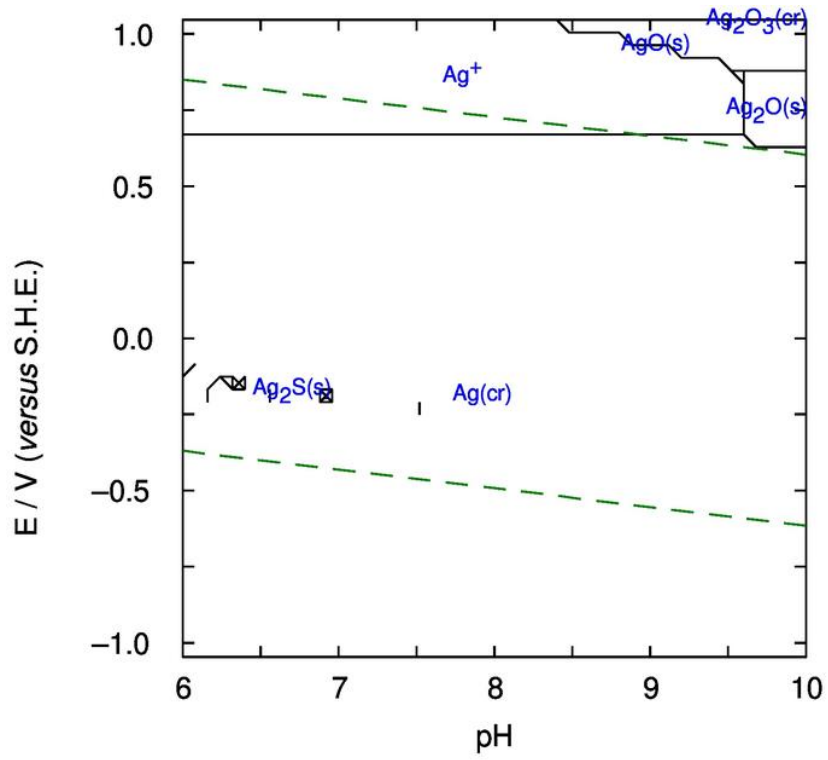

## S

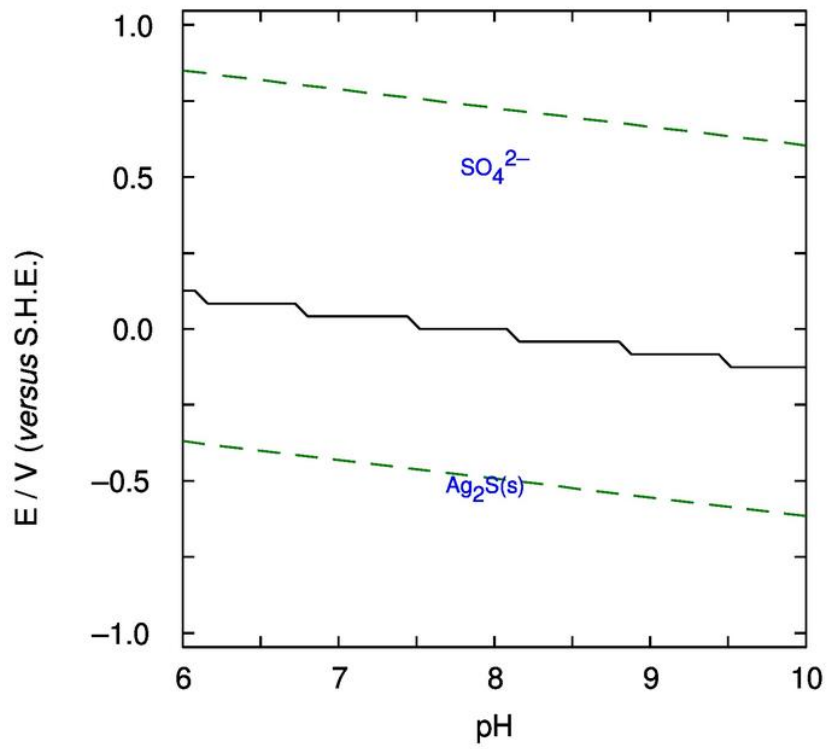

# AgSe

## Ag

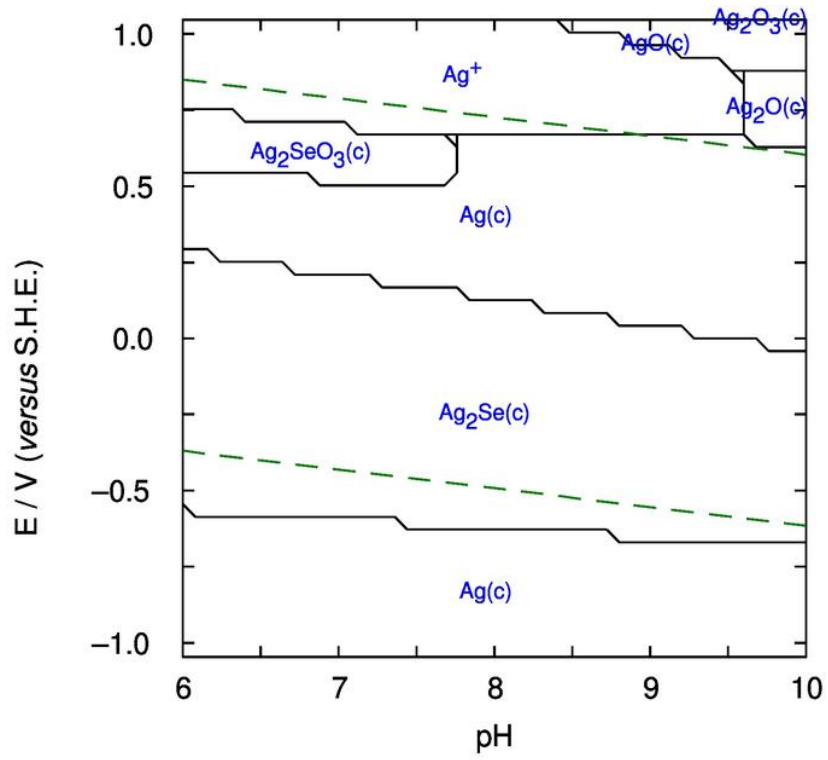

## Se

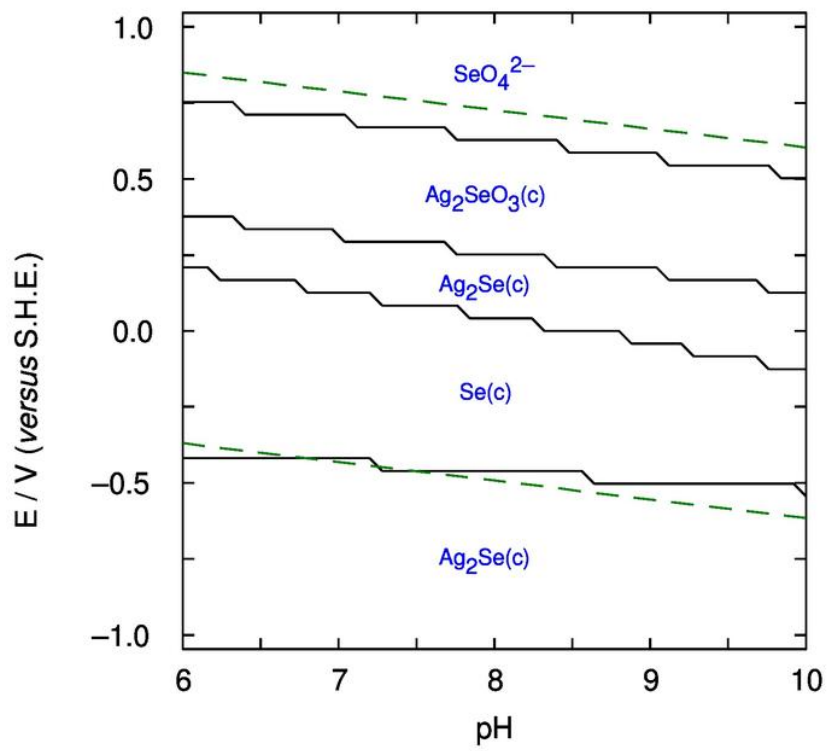

# AgSr

## Ag



## Sr

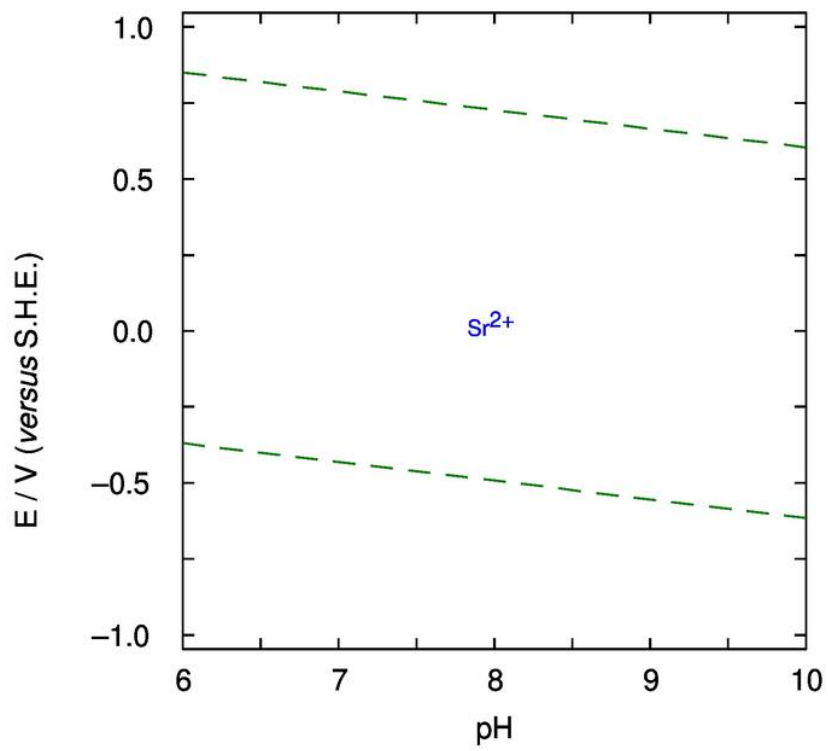



# AgY

## Ag



## Y

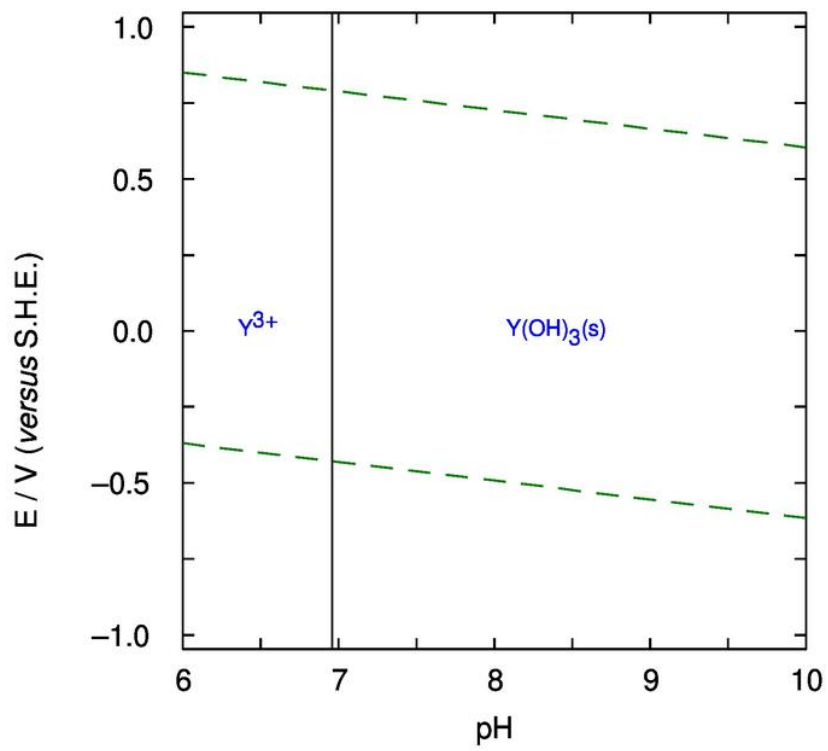

# AgZn

## Ag



## Zn

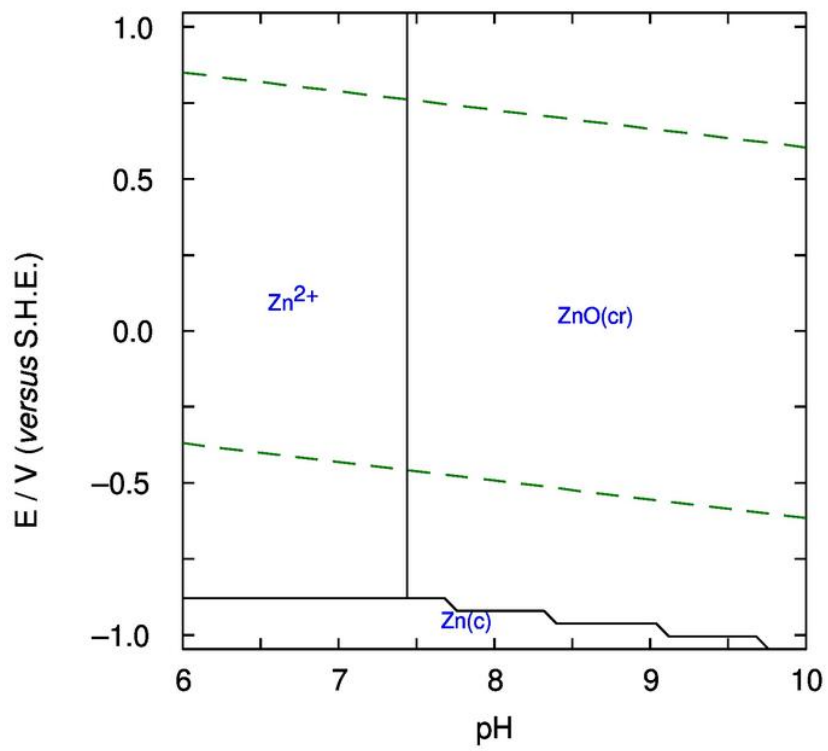

# AlAg

## Al

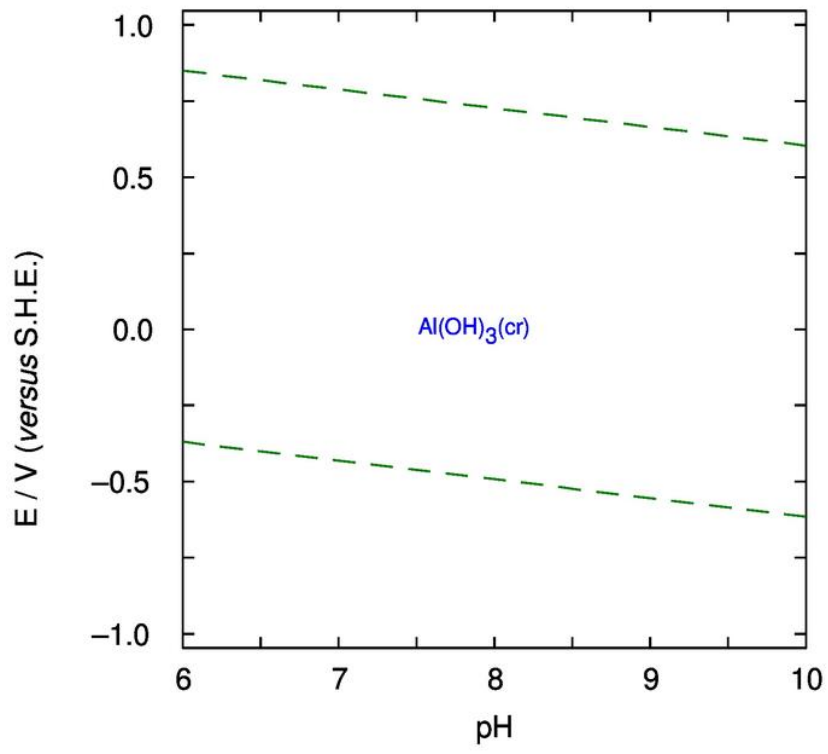

## Ag

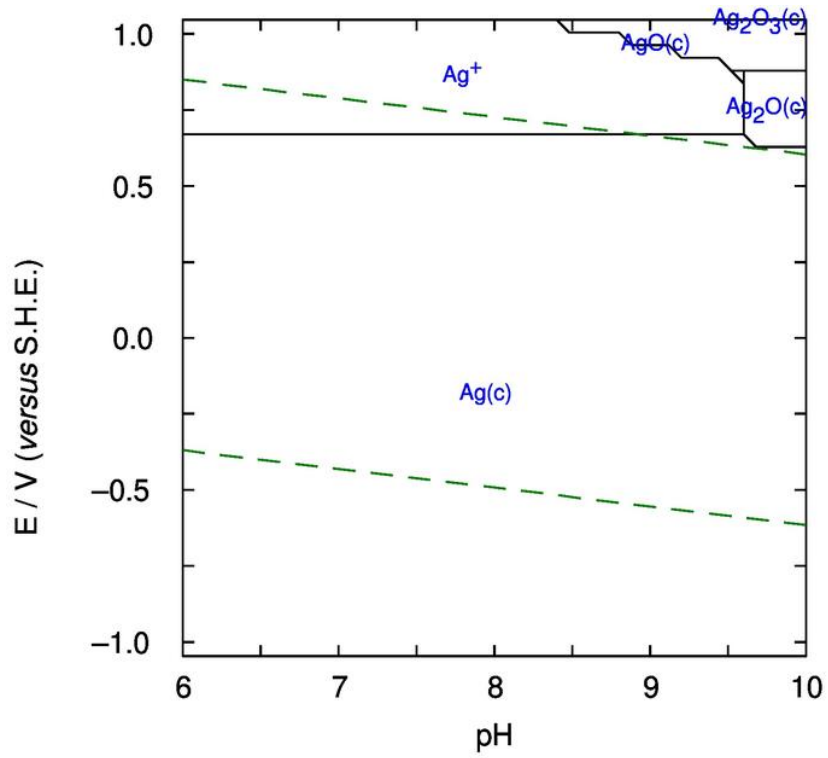

# AlCo

## Al



## Co

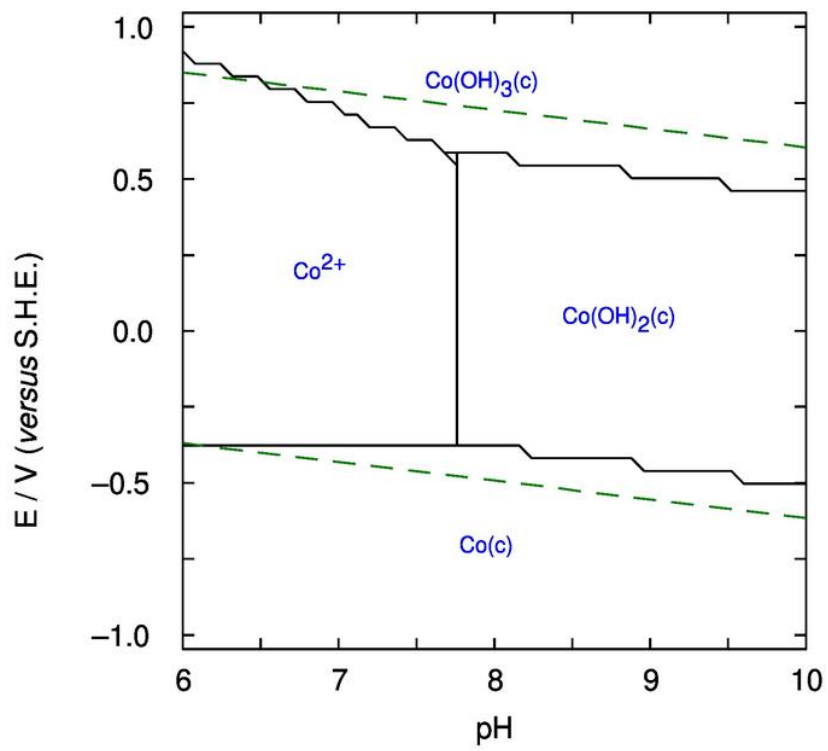

# AlCr

## Al



## Cr

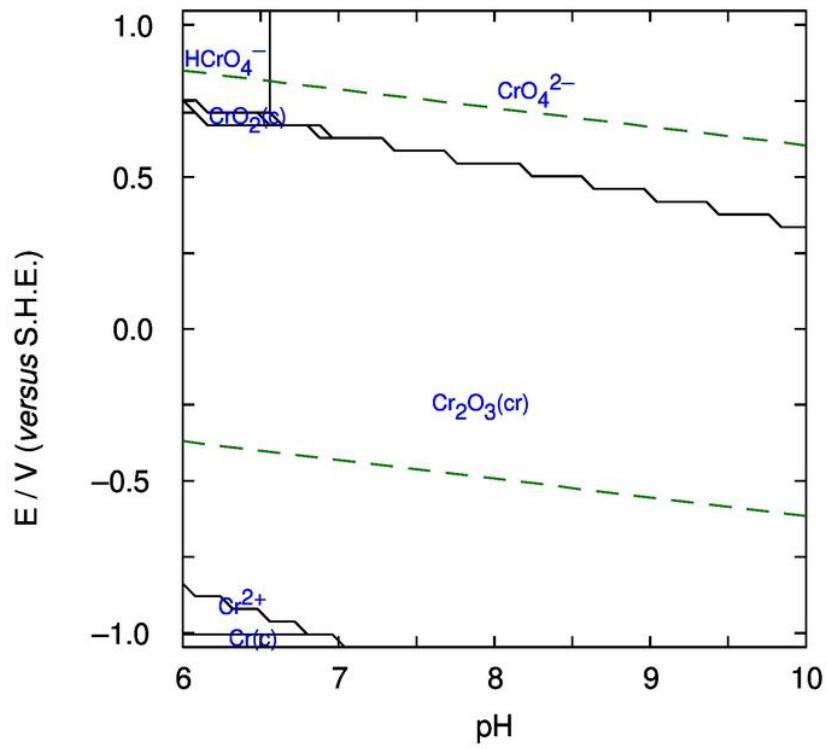

# AICu

## Al



## Cu

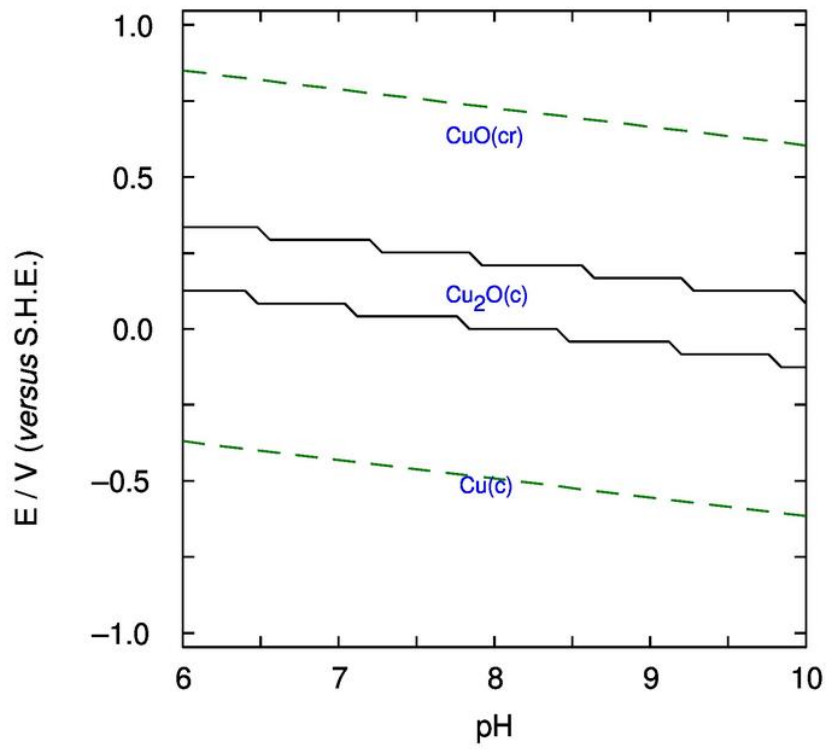

# AlFe

## Al

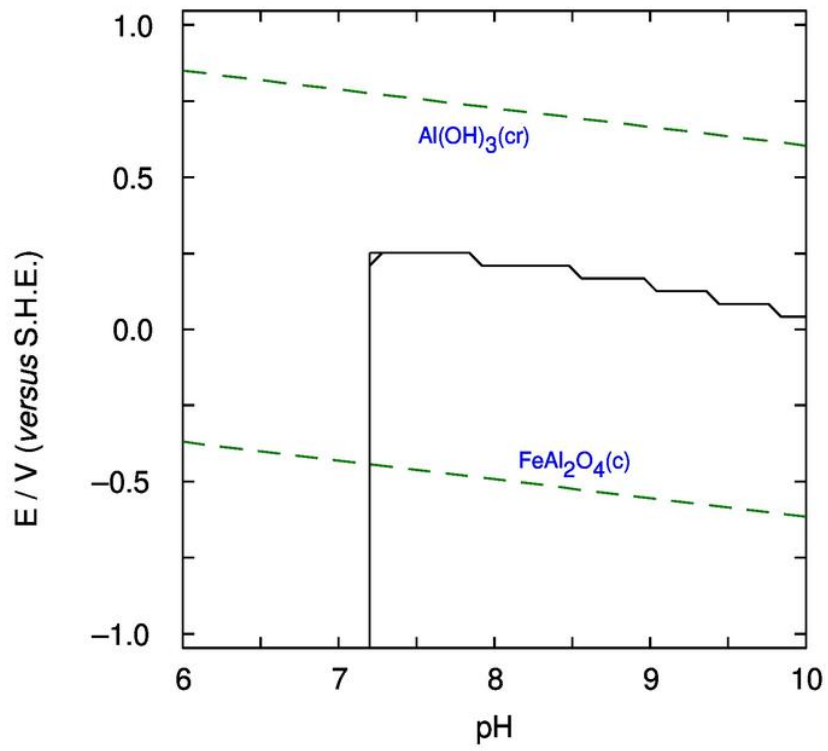

## Fe

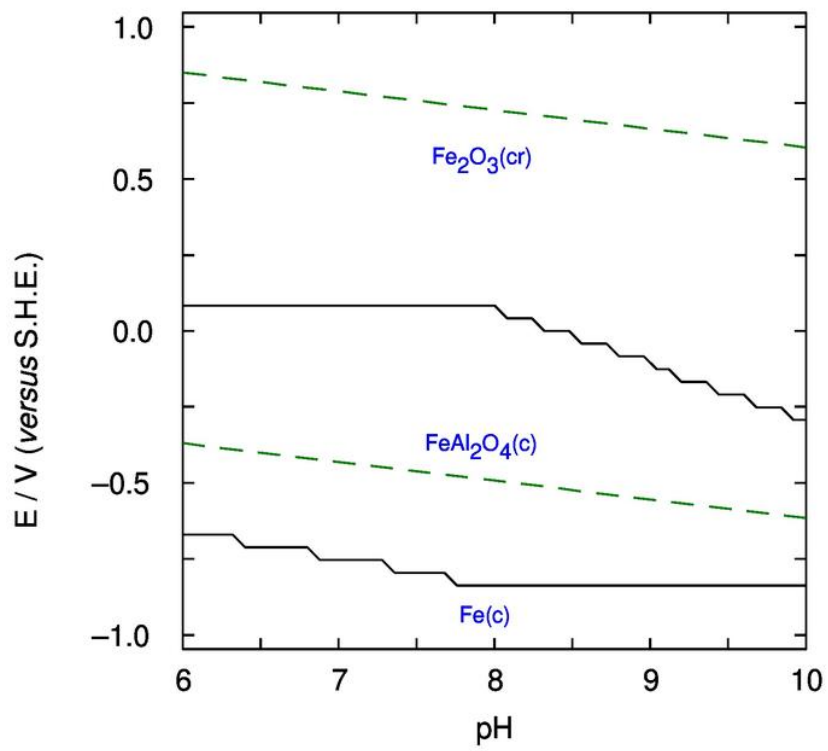

# AlMn

## Al

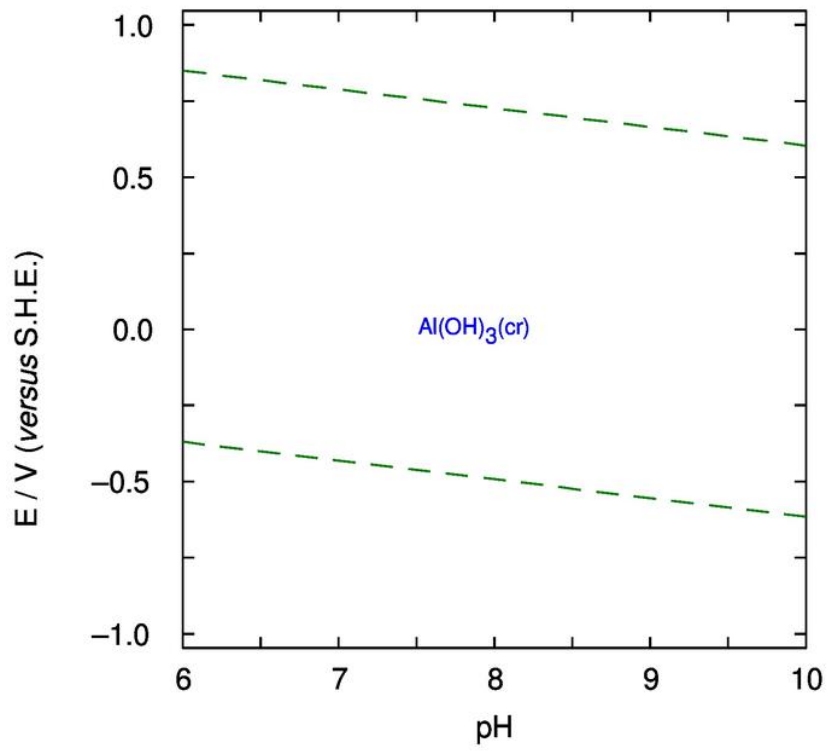

## Mn





# AlMo

## Al



## Mo

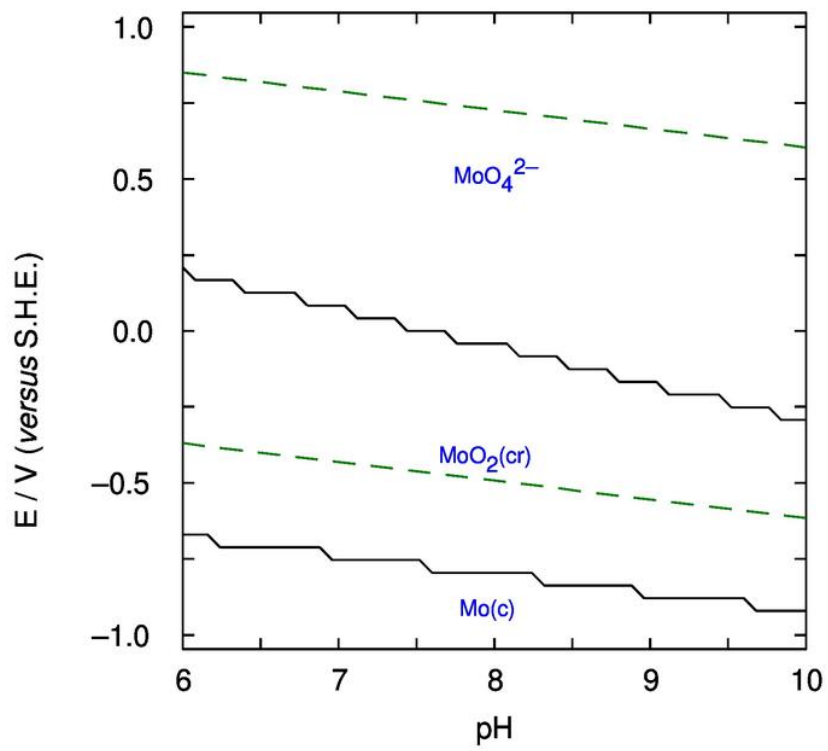

# AlNi

## Al



## Ni

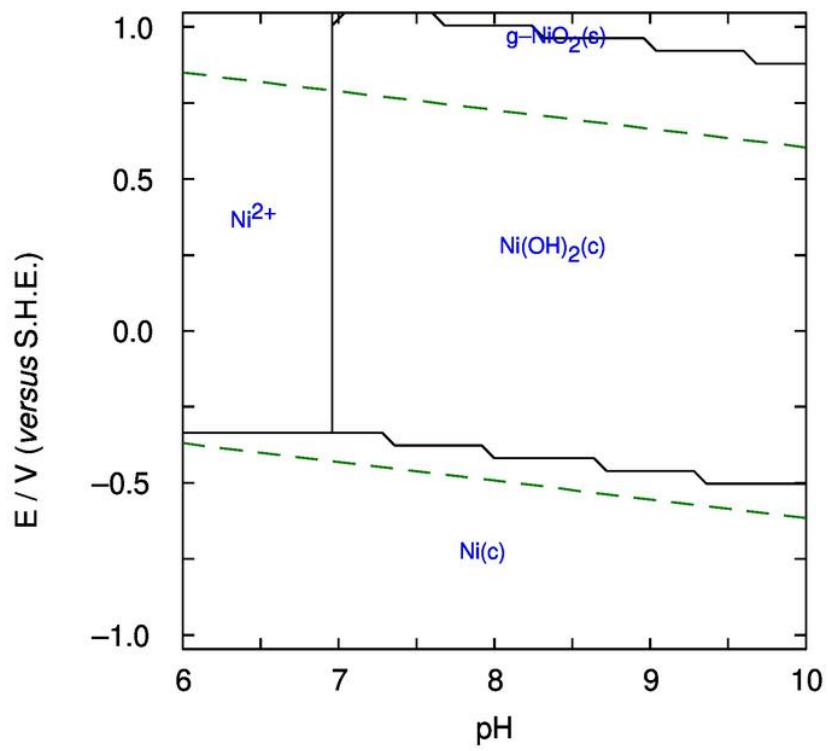

# AIRb

## Al



## Rb

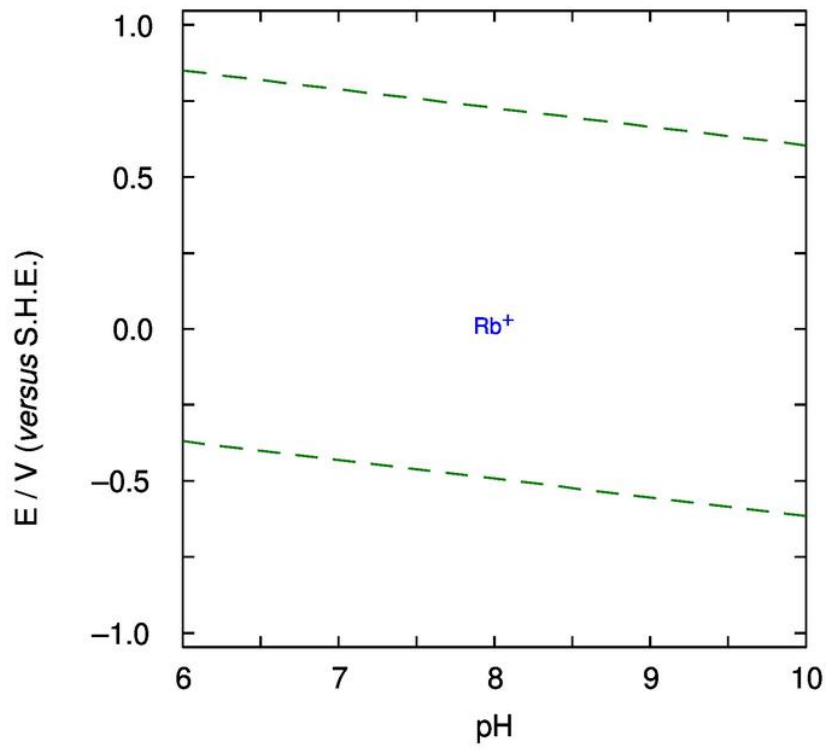

# AIS

## AI



## S

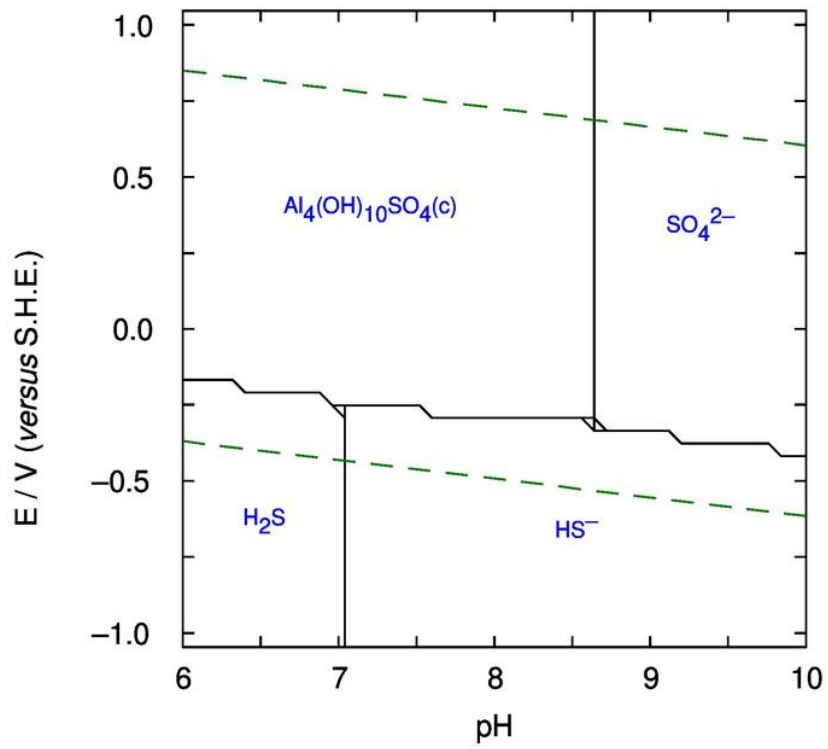

# AlSe

## Al



## Se

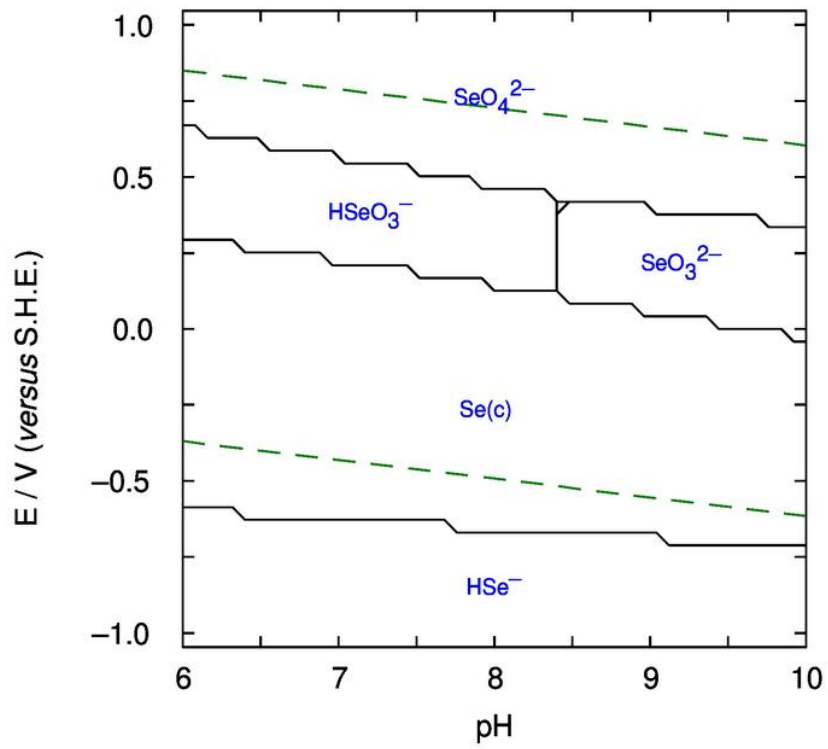

# AlSr

## Al



## Sr

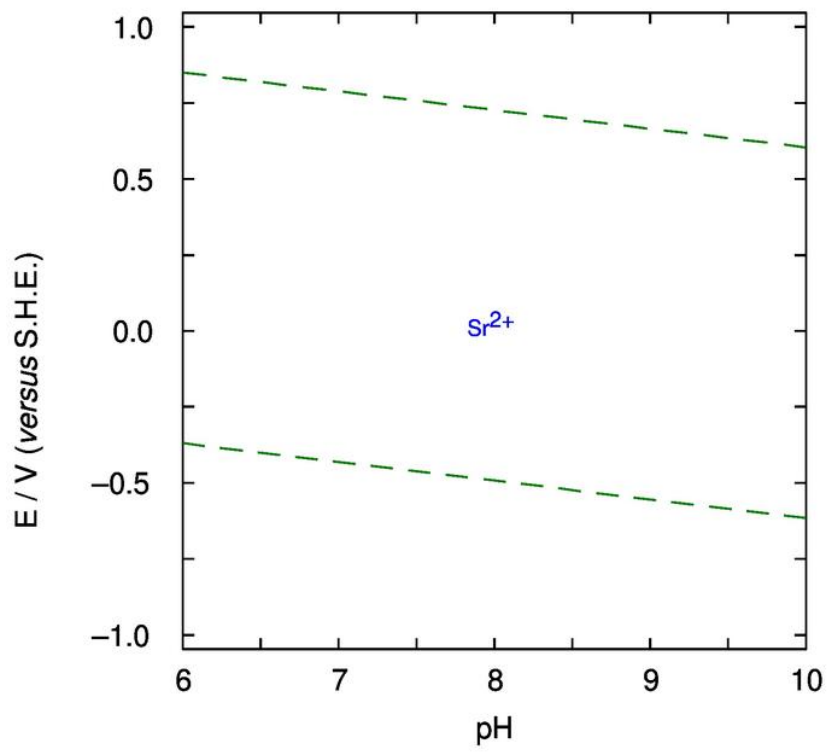

# AIV

## AI



## V

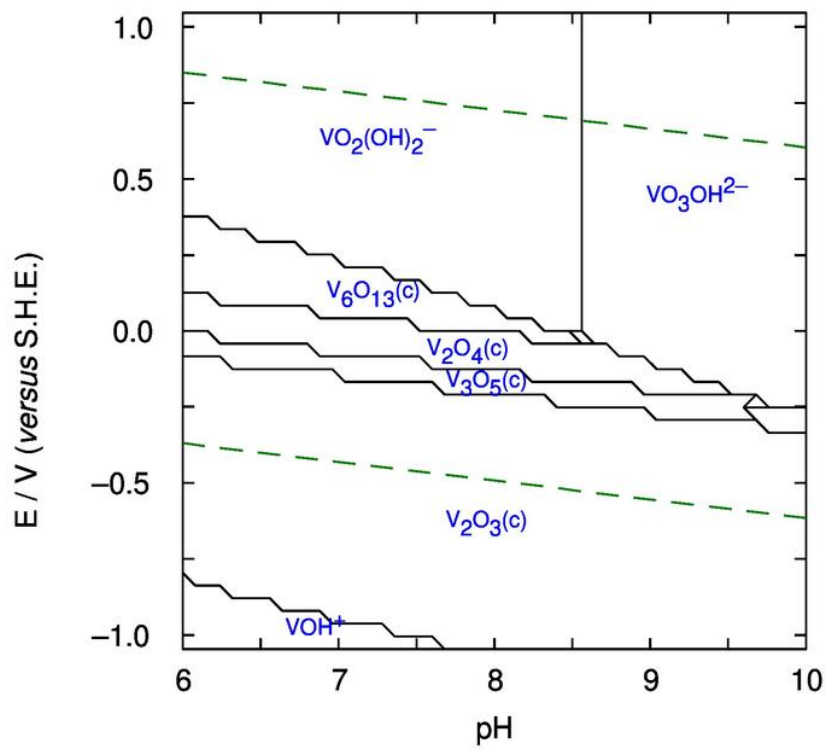

# AlY

## Al



## Y

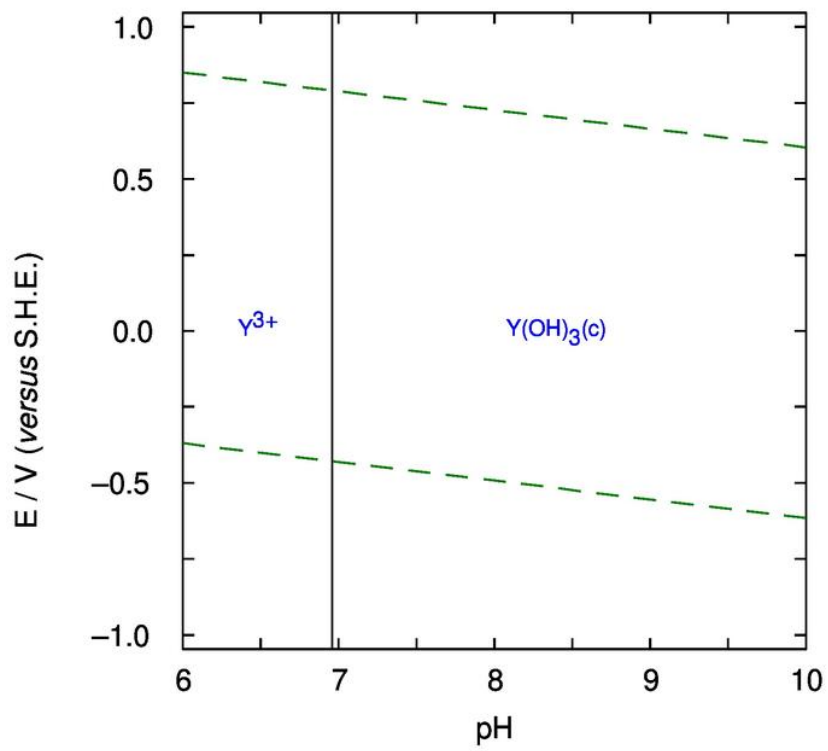



# AlZn

## Al



## Zn



# AlZr

## Al



## Zr

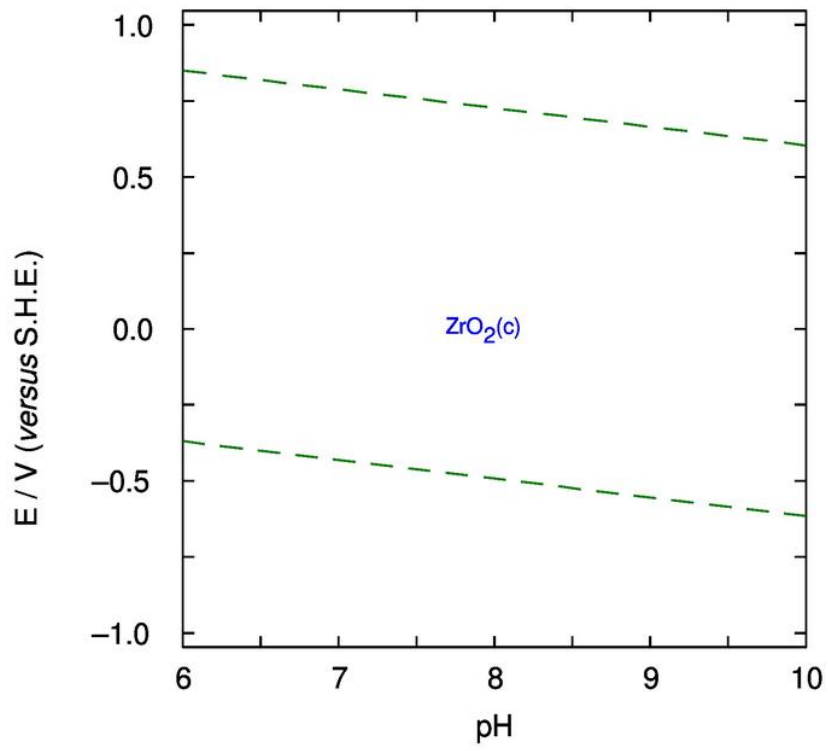

# AuAg

## Au

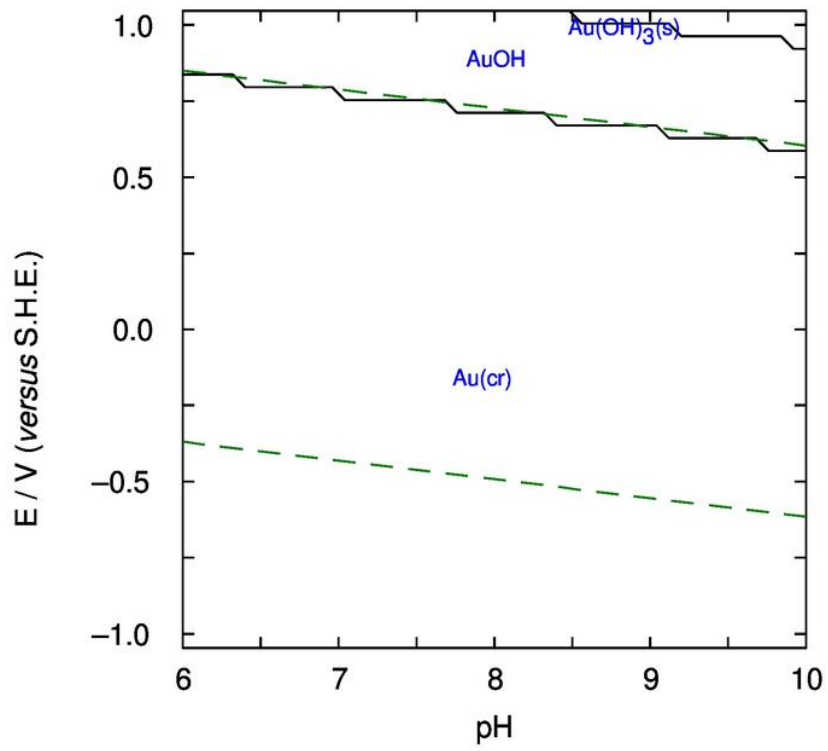

## Ag

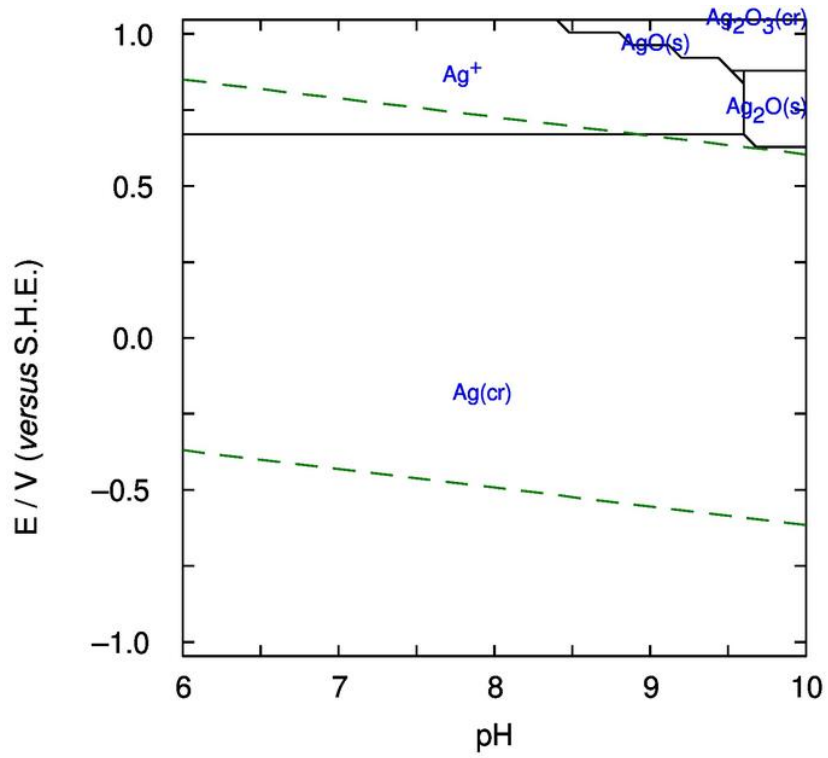

# AuAl

## Au

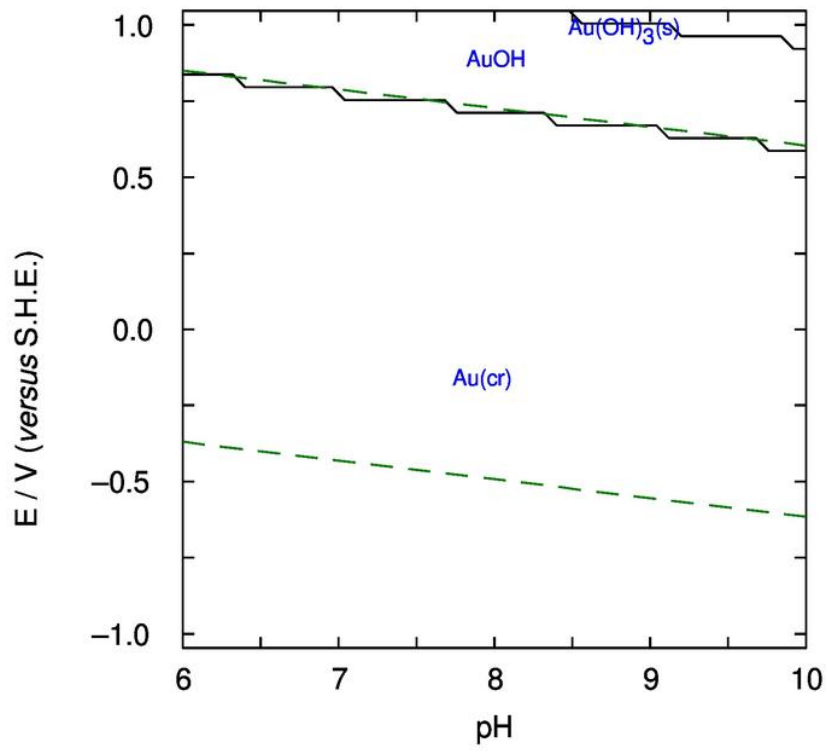

## Al

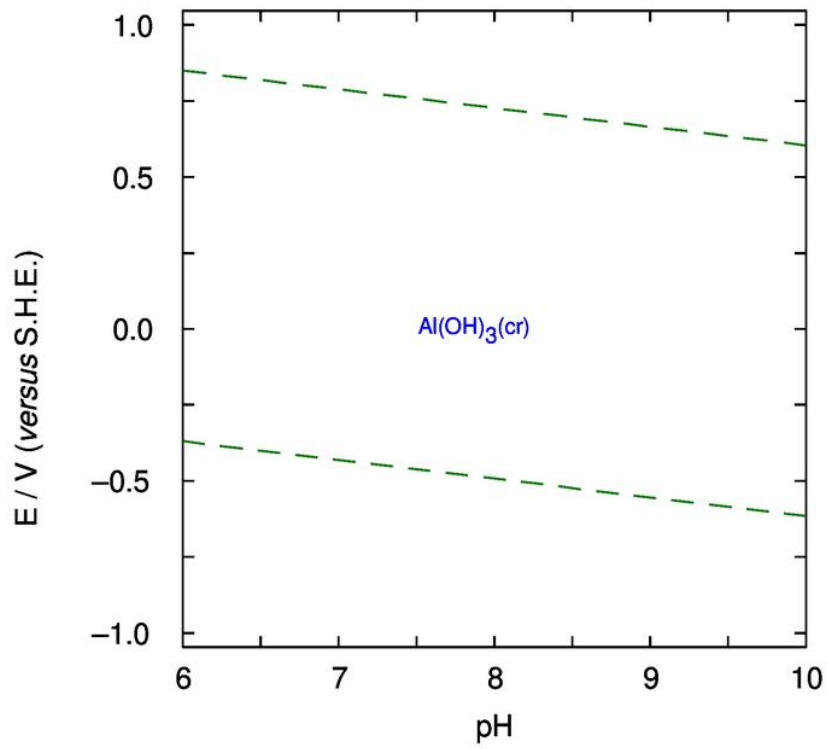

# AuBa

## Au



## Ba

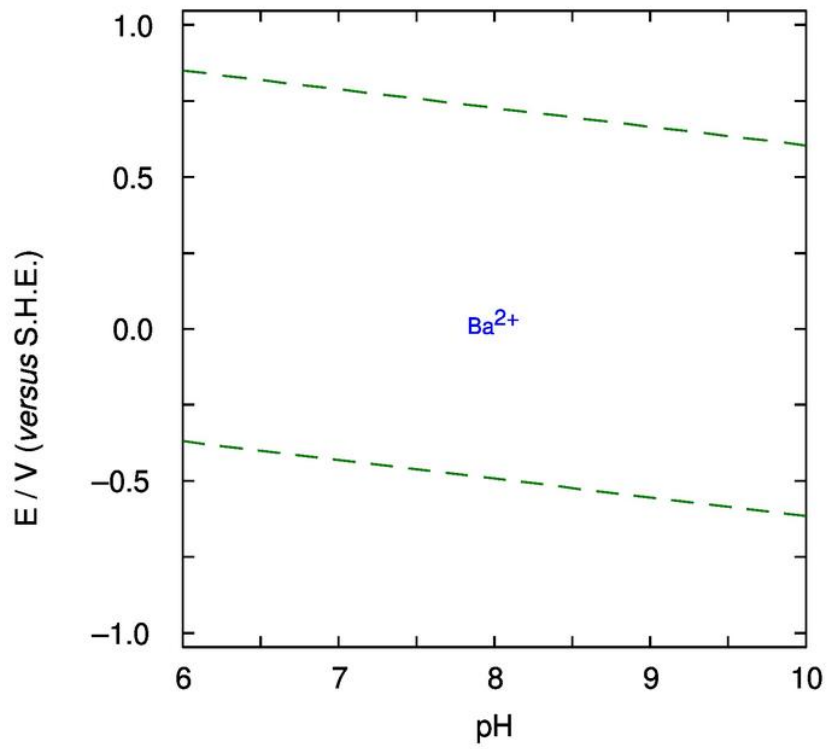

# AuCd

## Au



## Cd

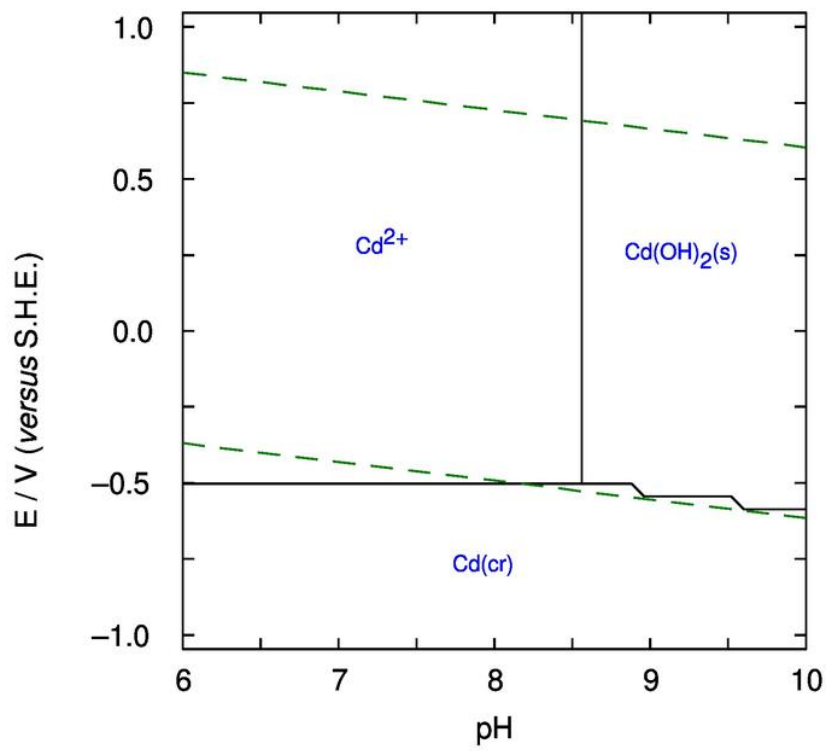

# AuCe

## Au



## Ce

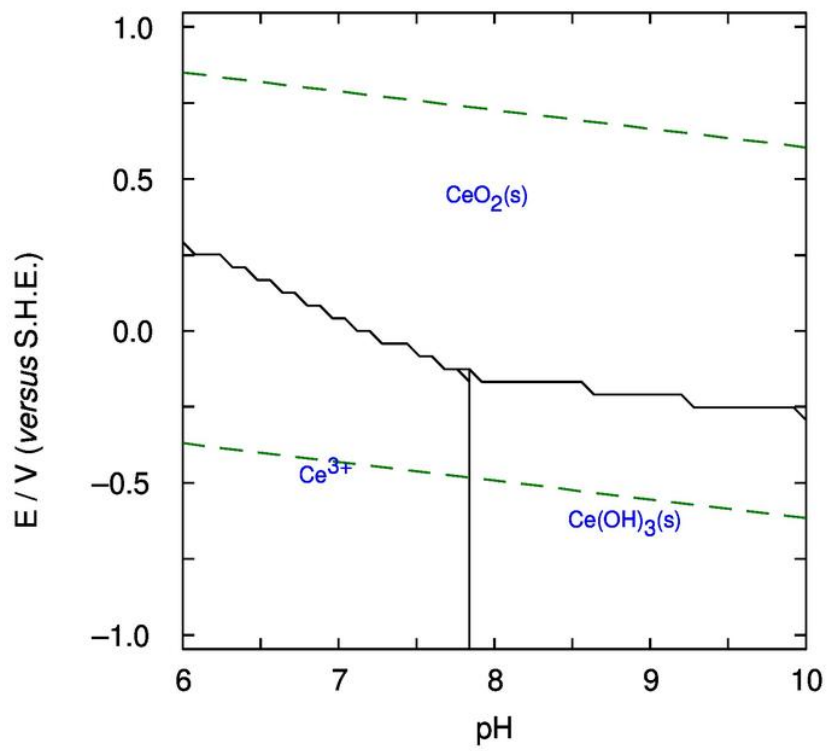

# AuCo

## Au



## Co

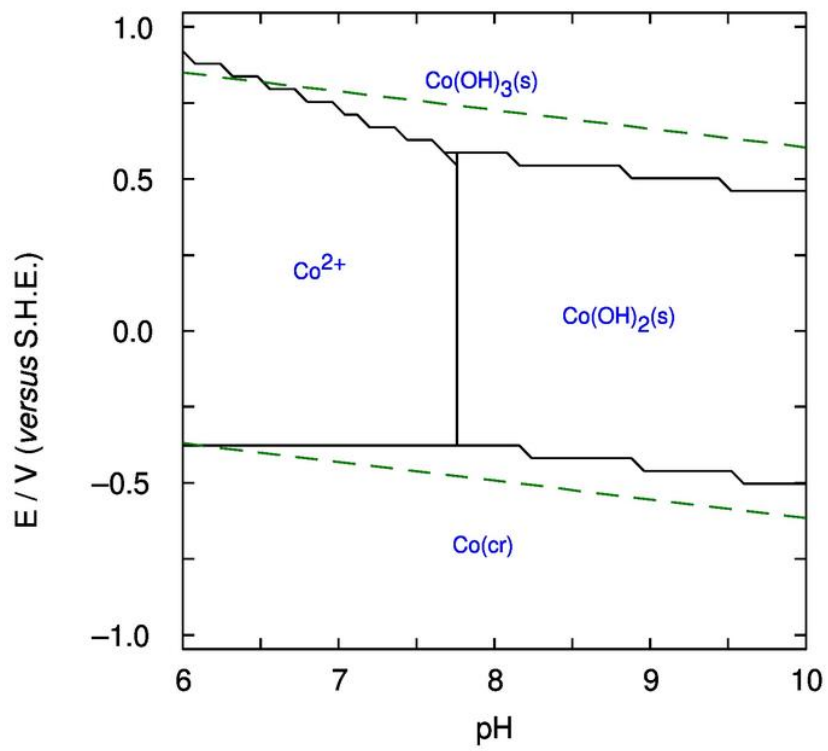



# AuCr

## Au



## Cr

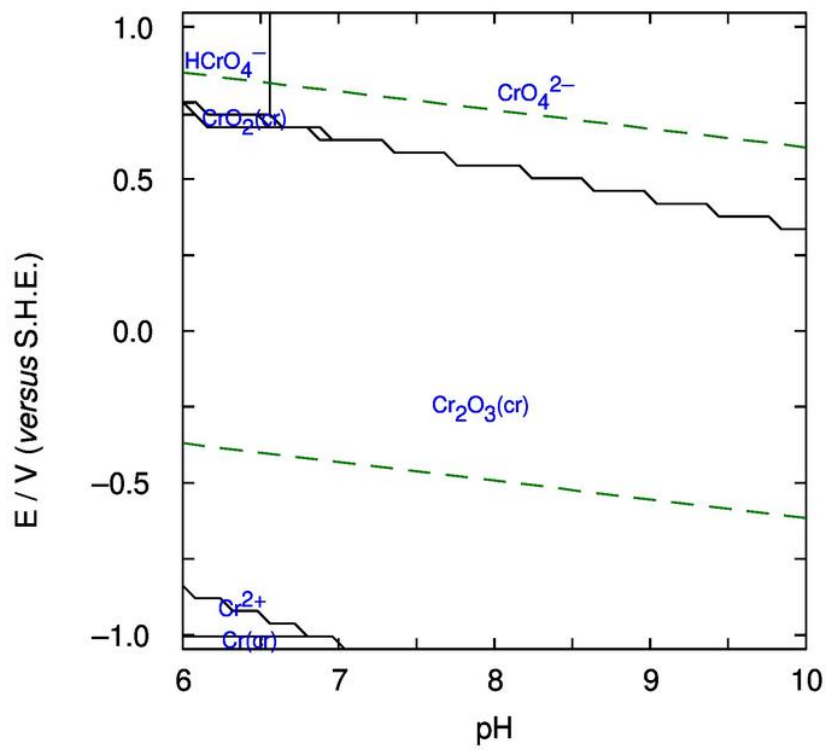

# AuCu

## Au



## Cu

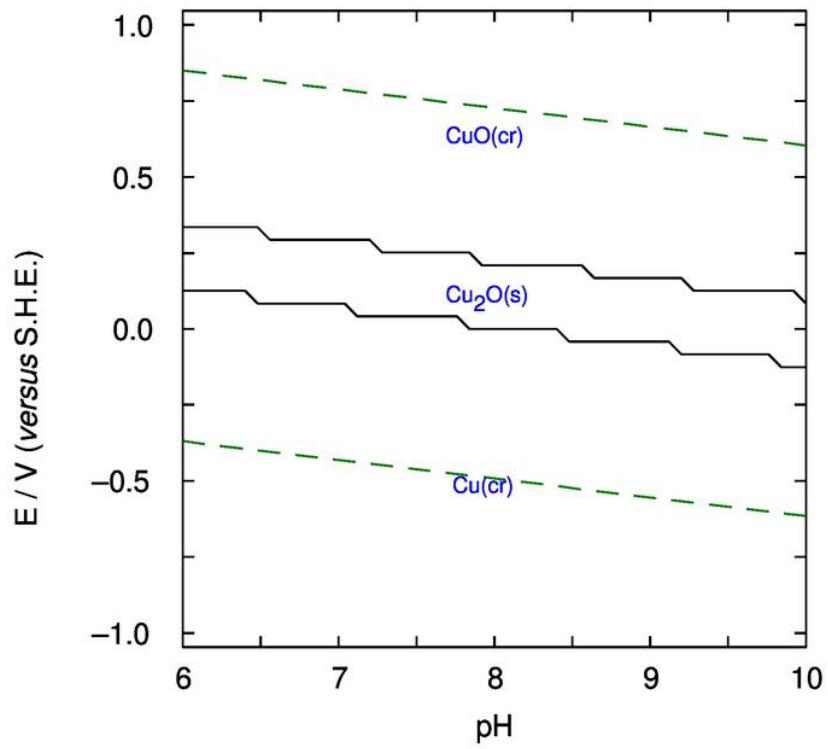

# AuEu

## Au



## Eu

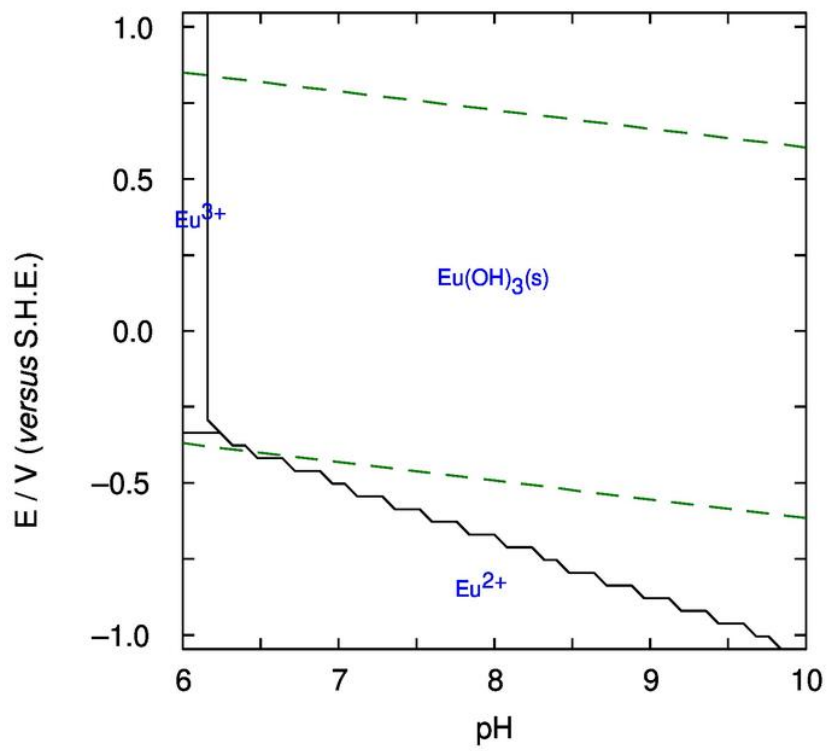

# AuFe

## Au



## Fe

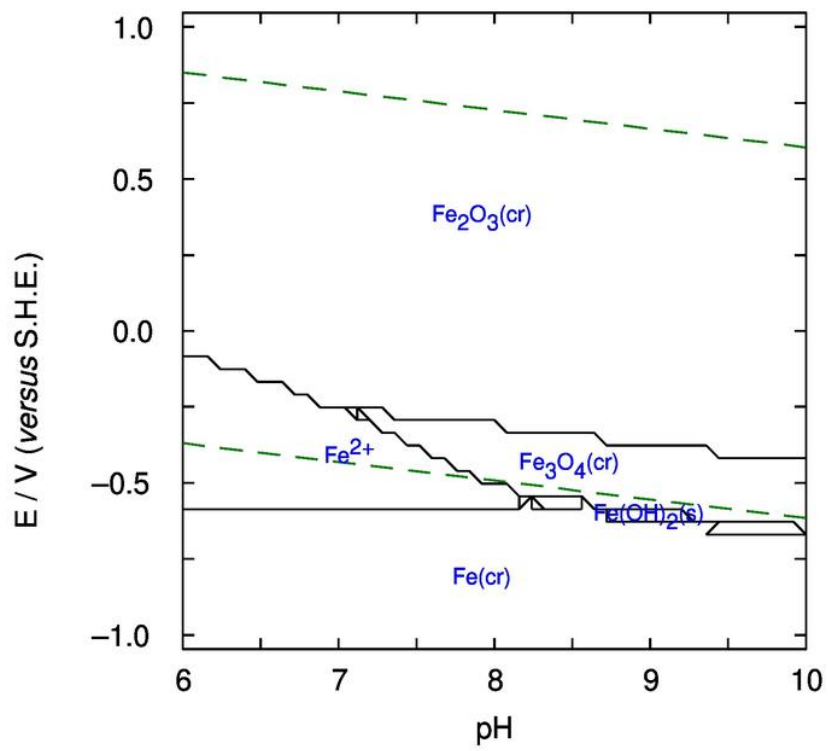

# AuGd

## Au



## Gd

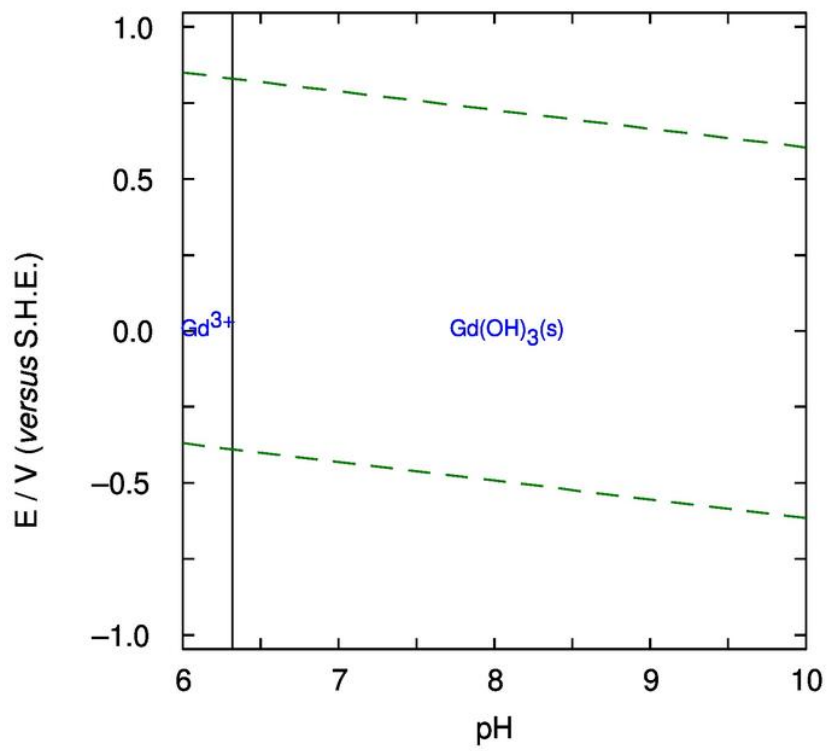

# AuIn

## Au



## In

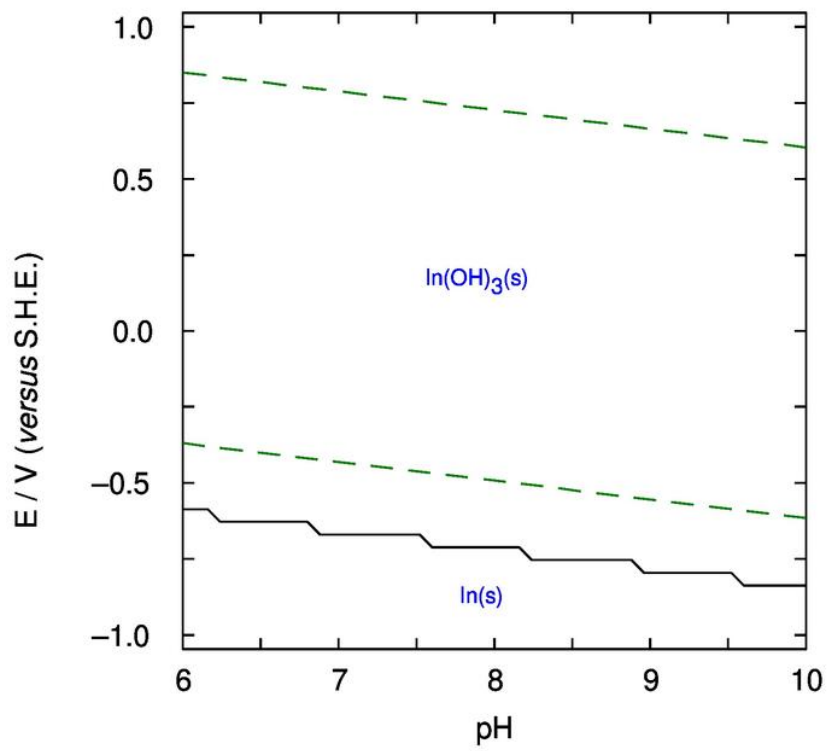

# AuLa

## Au



## La

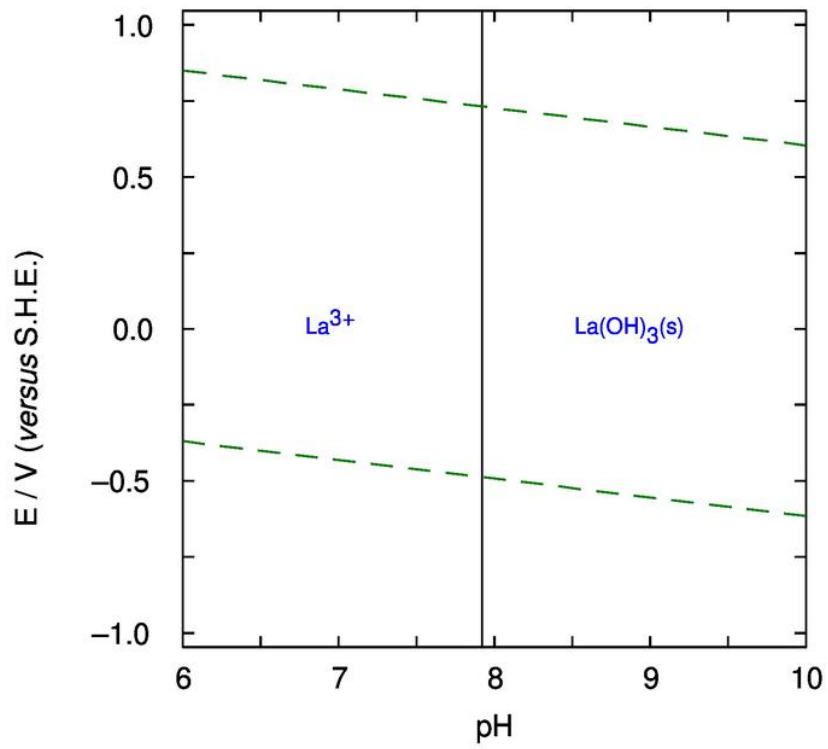

# AuMn

## Au



## Mn

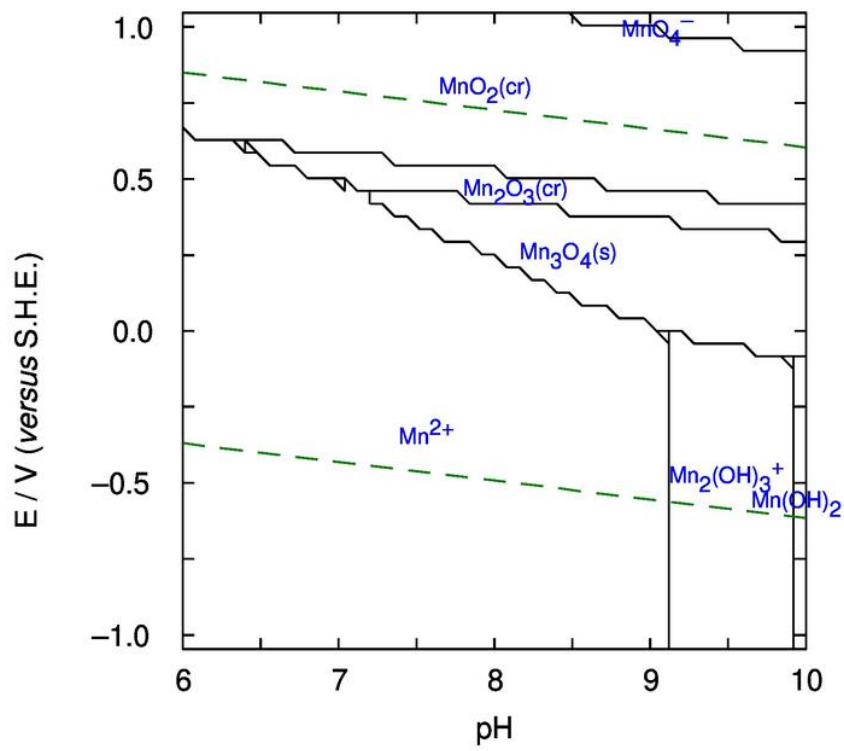



# AuMo

## Au



## Mo

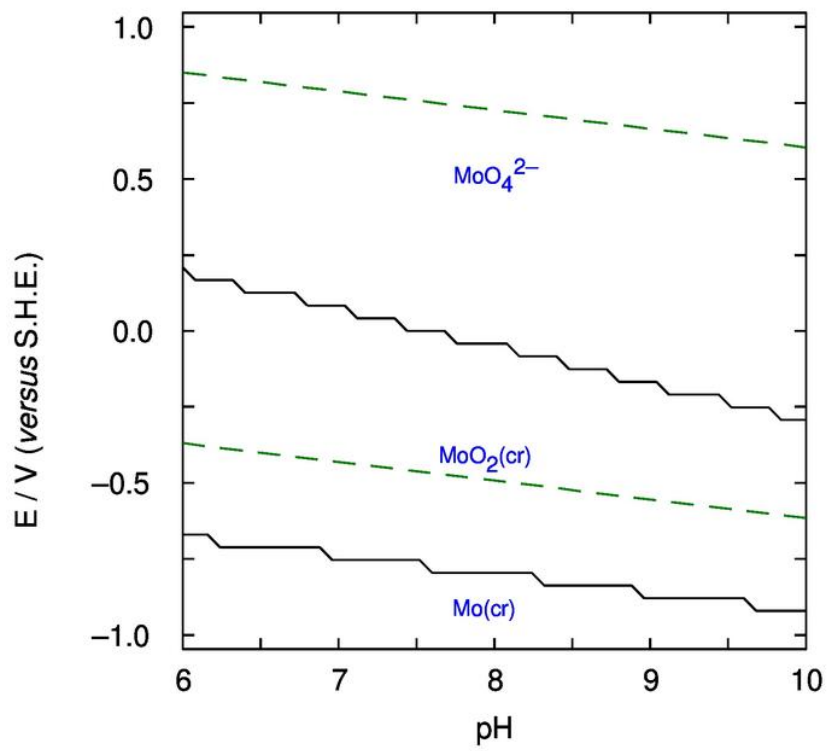

# AuNd

## Au



## Nd

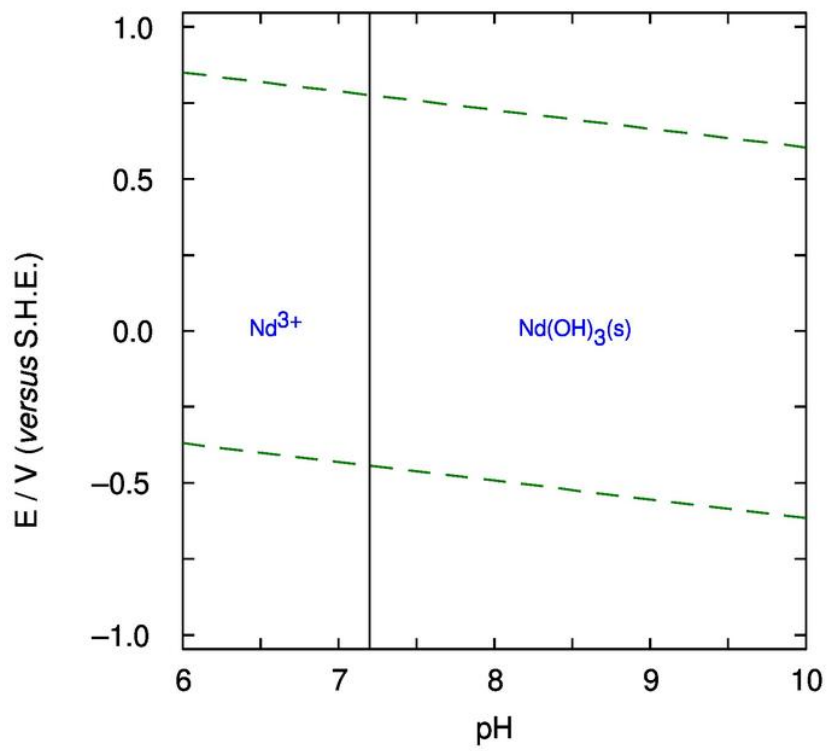

# AuNi

## Au



## Ni

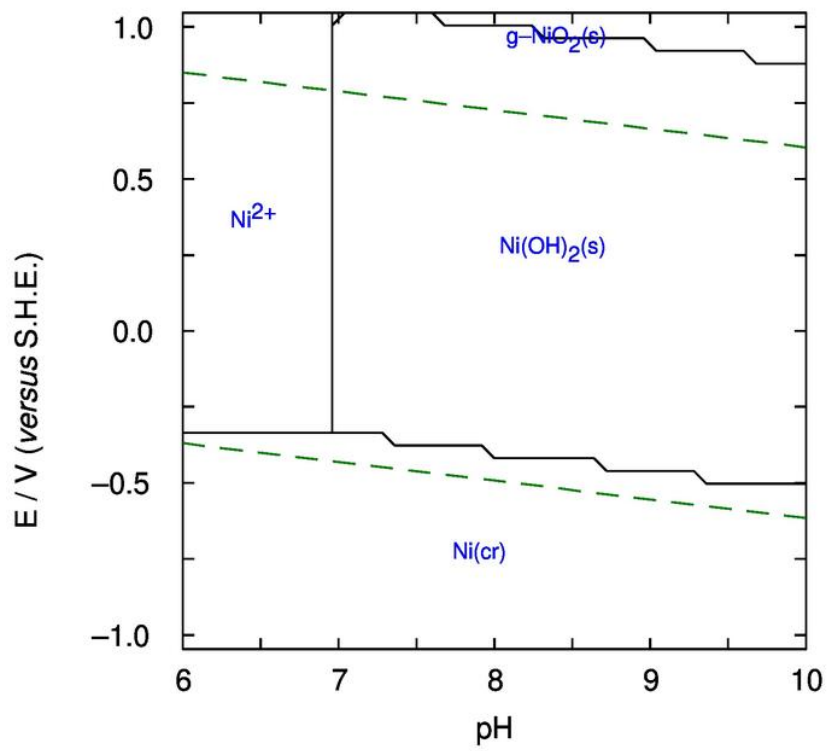

# AuPr

## Au



## Pr

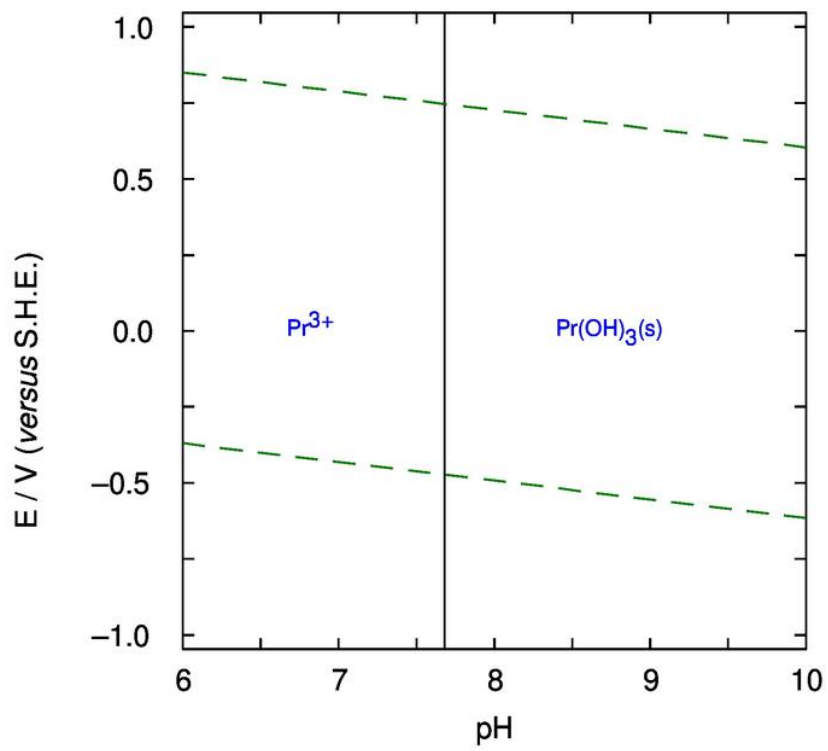

# AuRb

## Au



## Rb

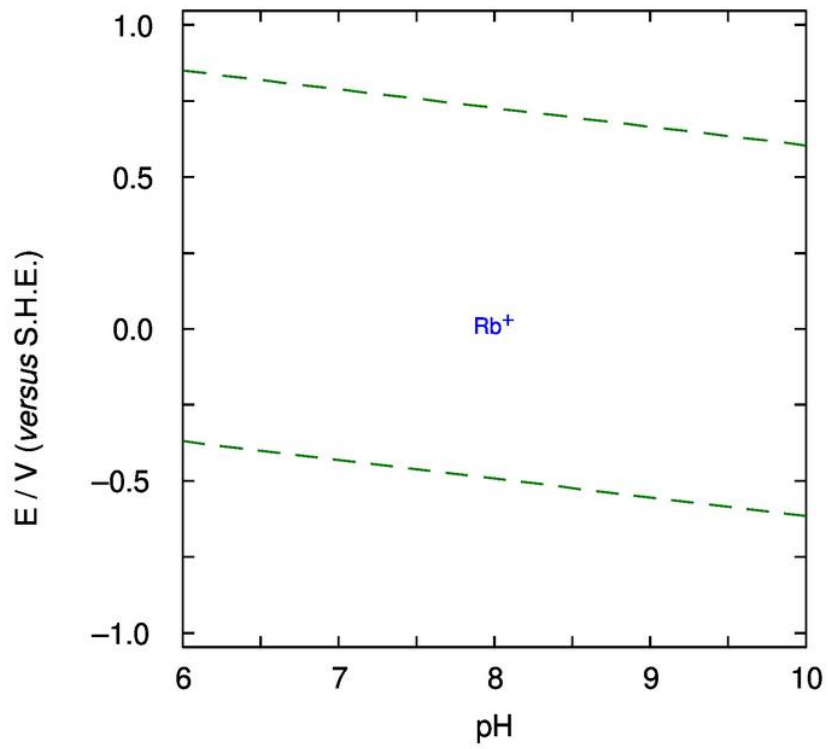

# AuS

## Au



## S

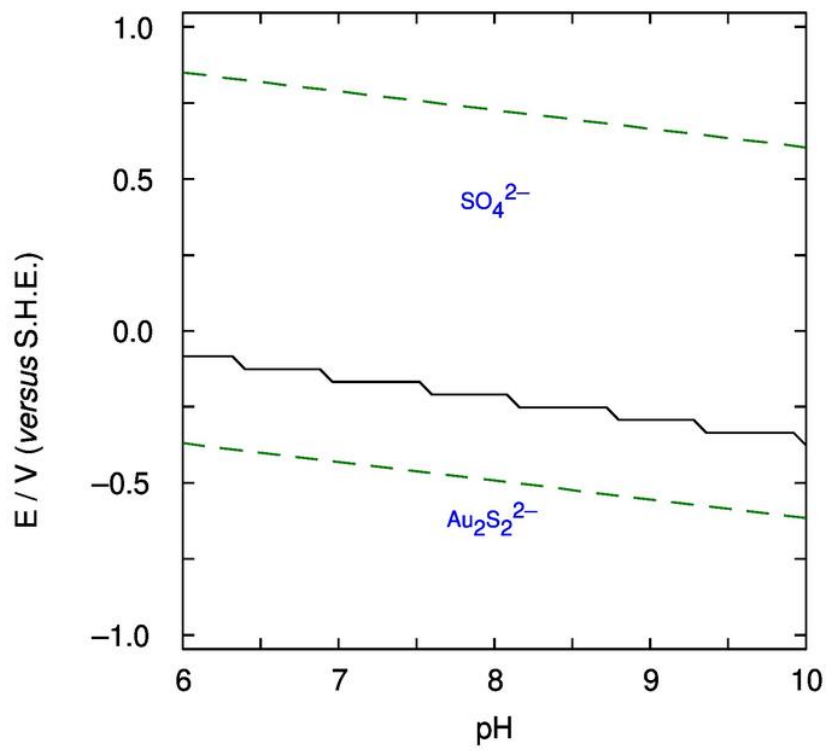

# AuSe

## Au



## Se

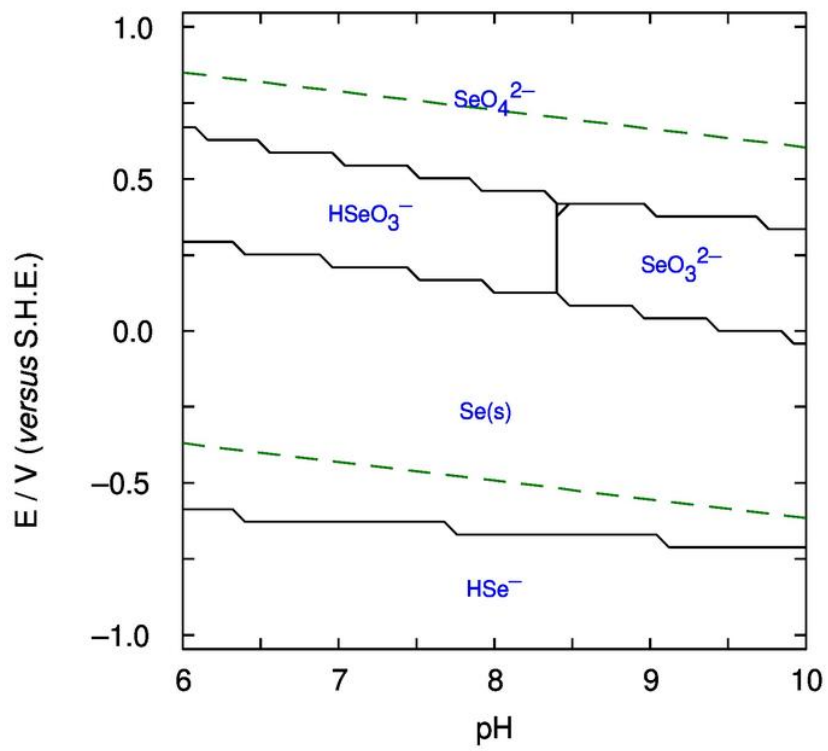

# AuSm

## Au



## Sm

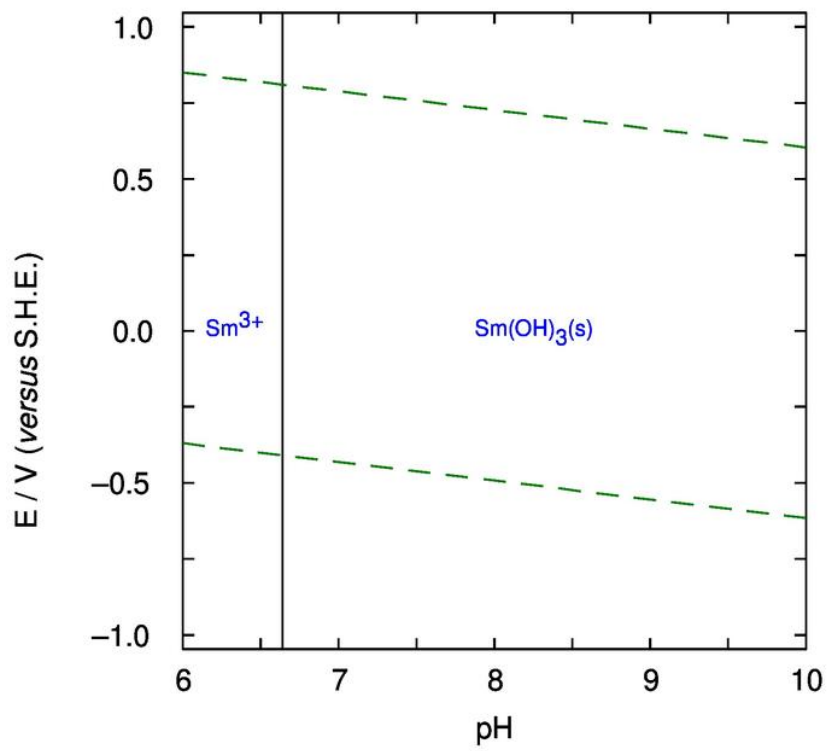



# AuSn

## Au



## Sn

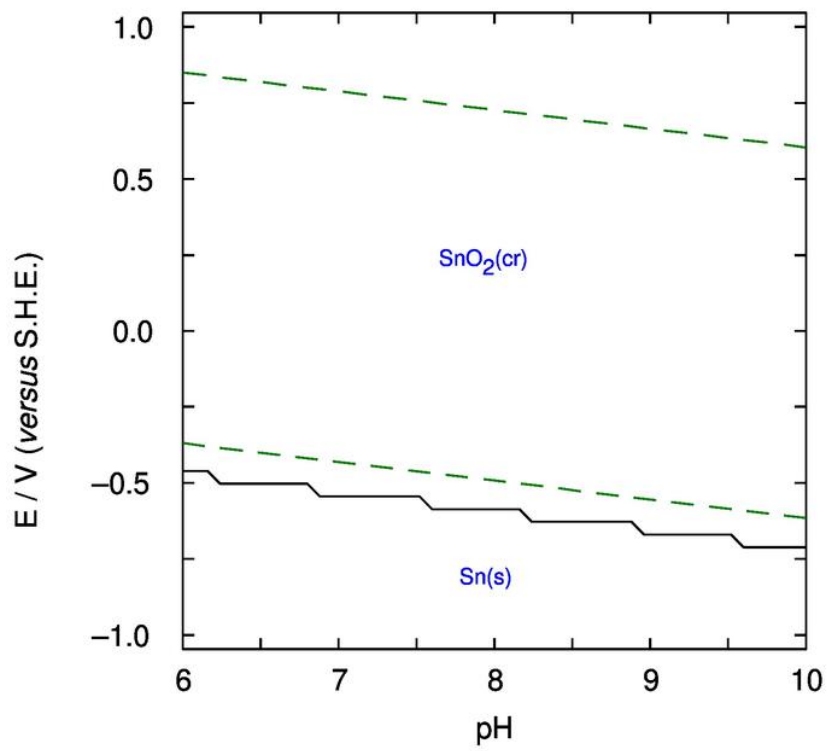

# AuSr

## Au



## Sr



# AuTe

## Au



## Te

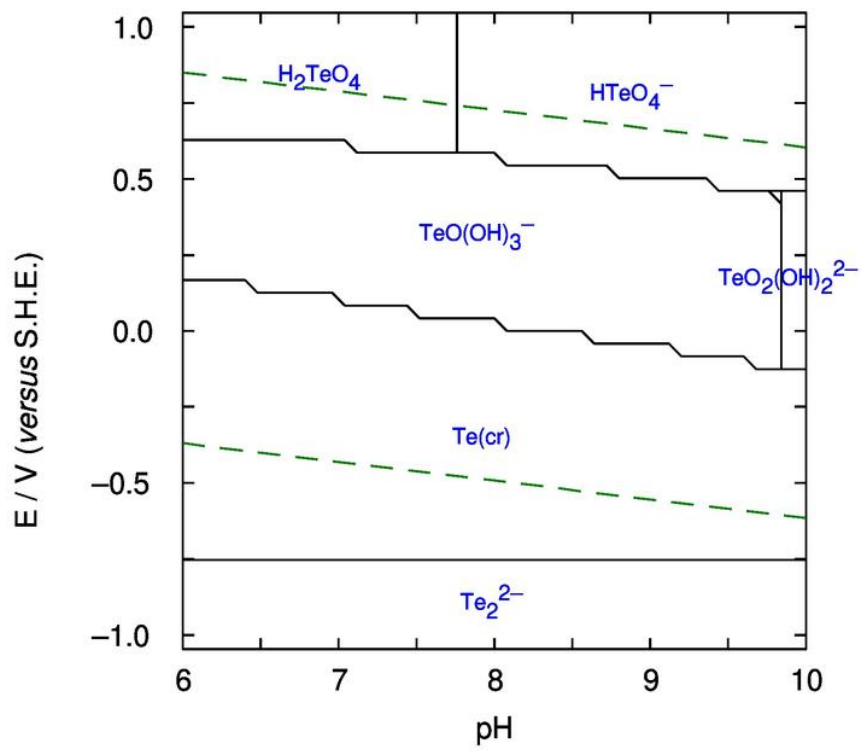

# AuV

## Au



## V

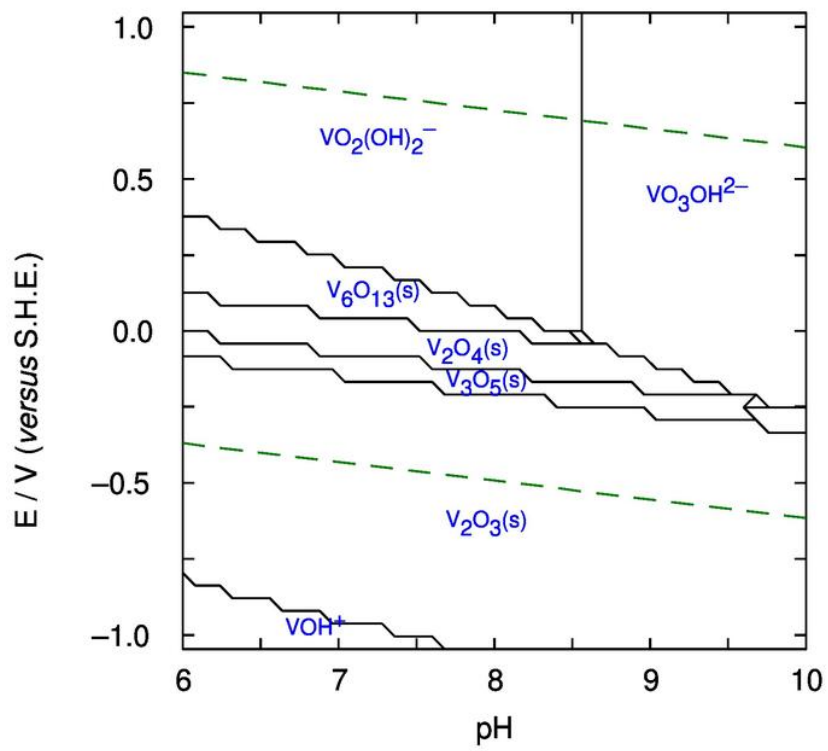

# AuW

## Au



## W

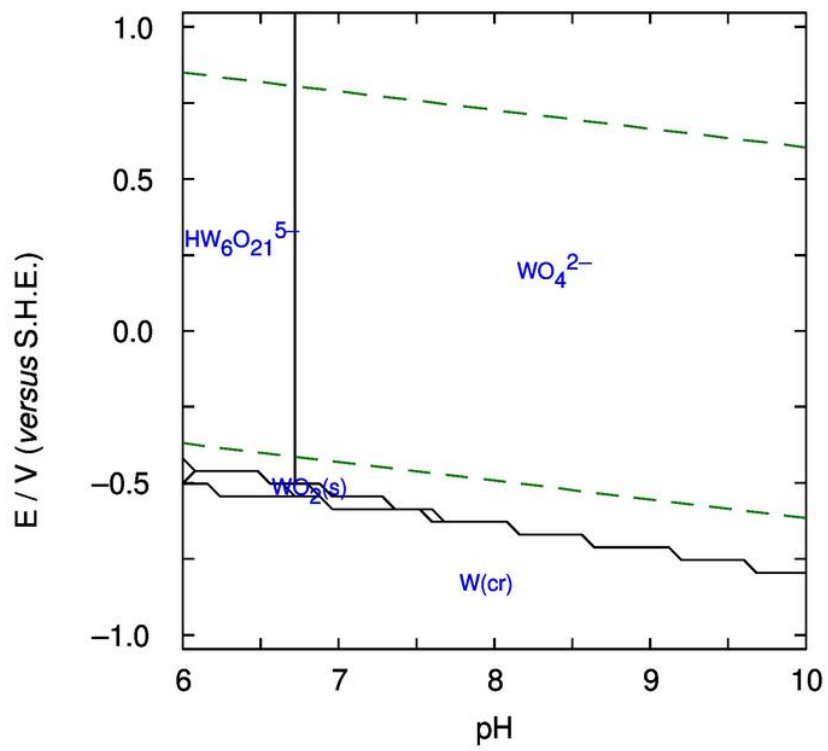

# AuY

## Au



## Y



# AuZn

## Au



## Zn

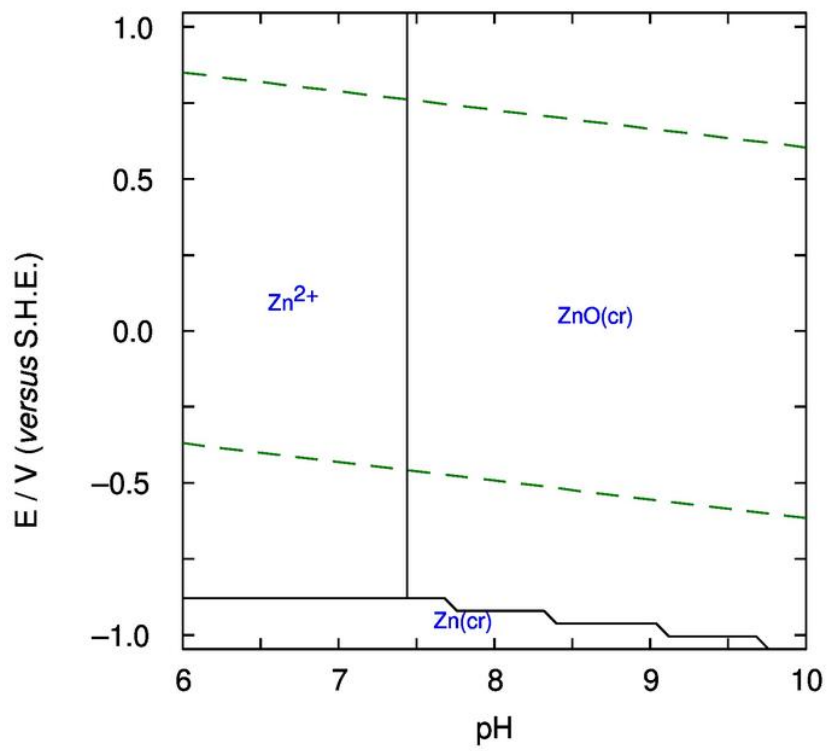

# AuZr

## Au



## Zr

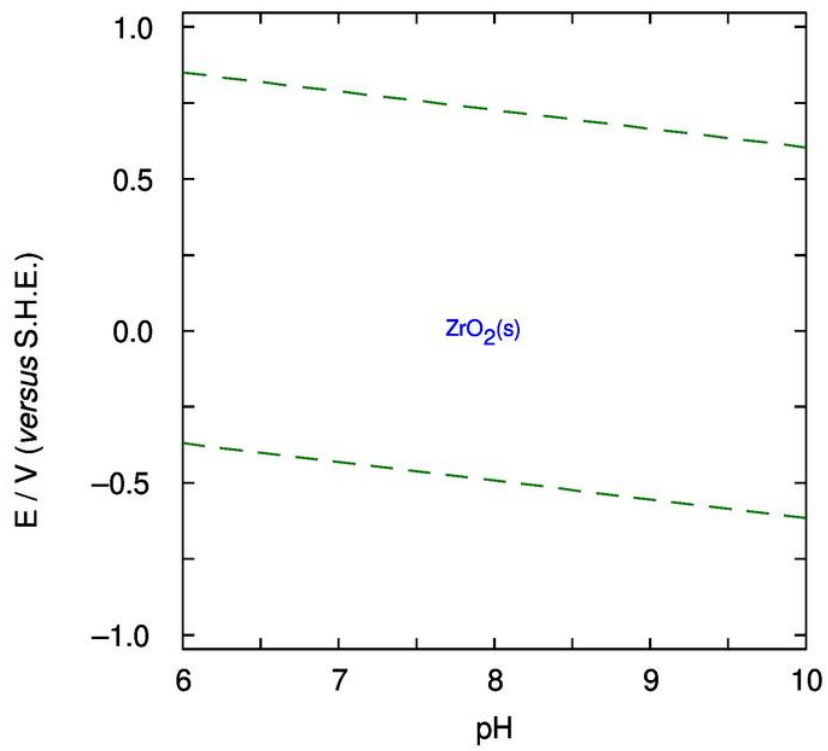



# B<sub>Ag</sub>

## B

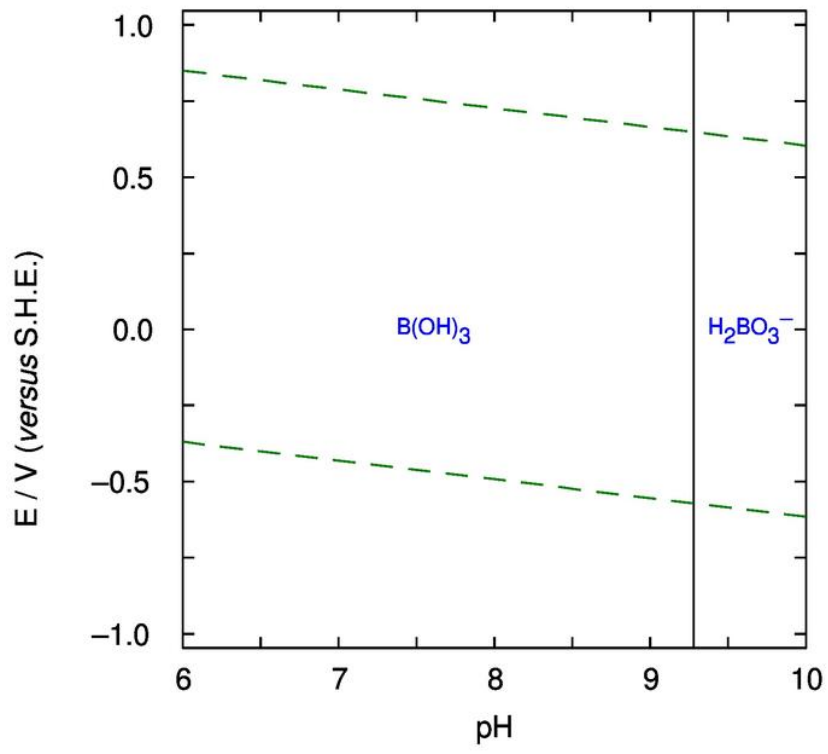

## Ag



# BAI

## B



## AI

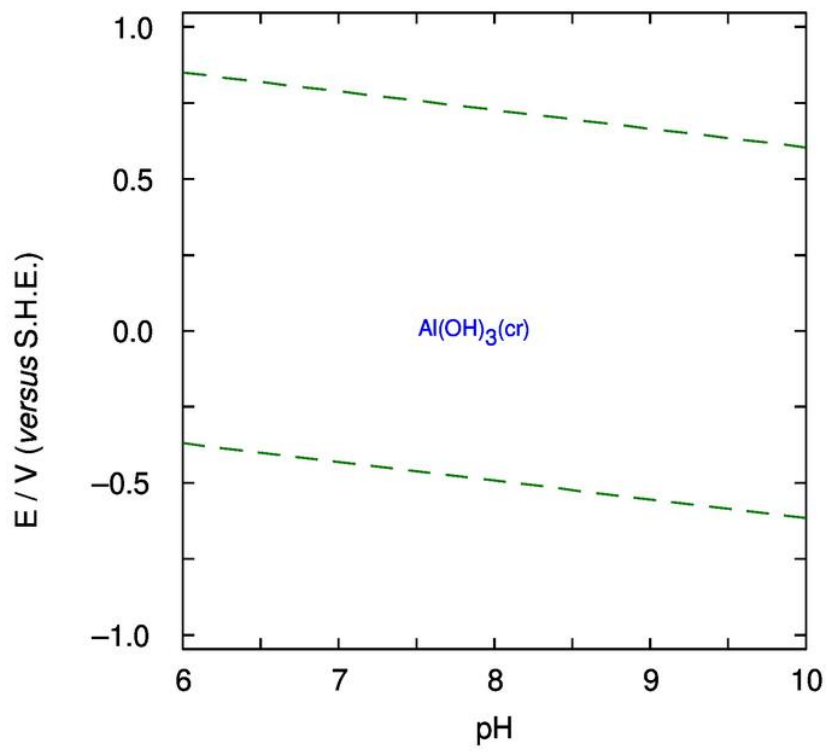

# BAu

## B

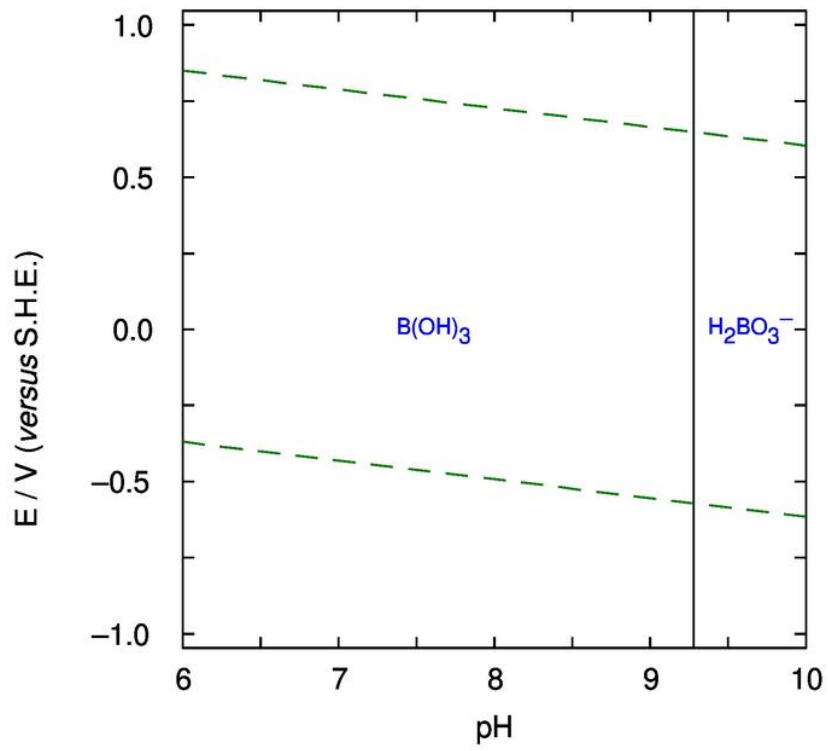

## Au

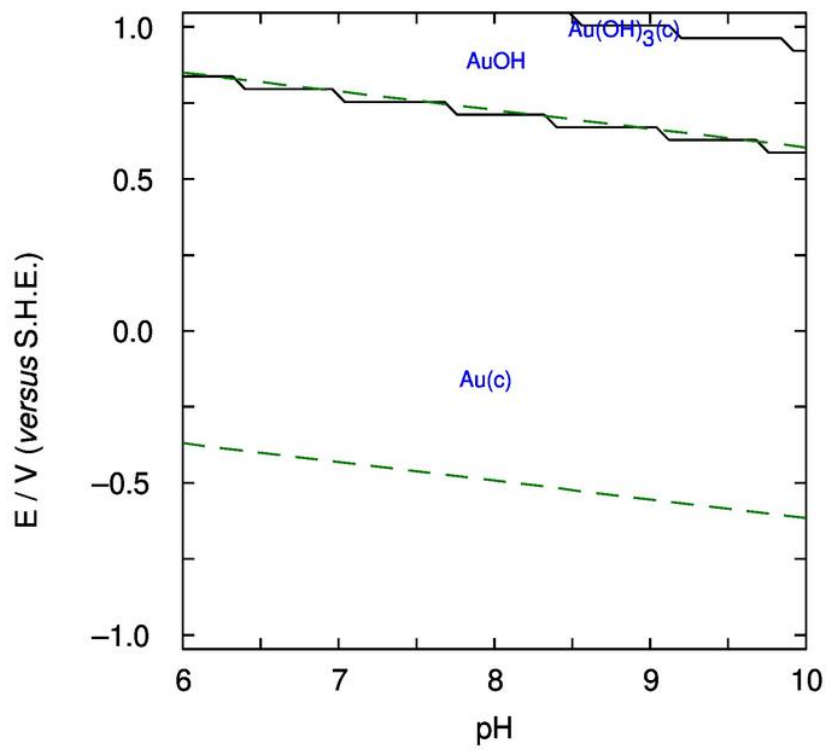

# BBa

## B



## Ba

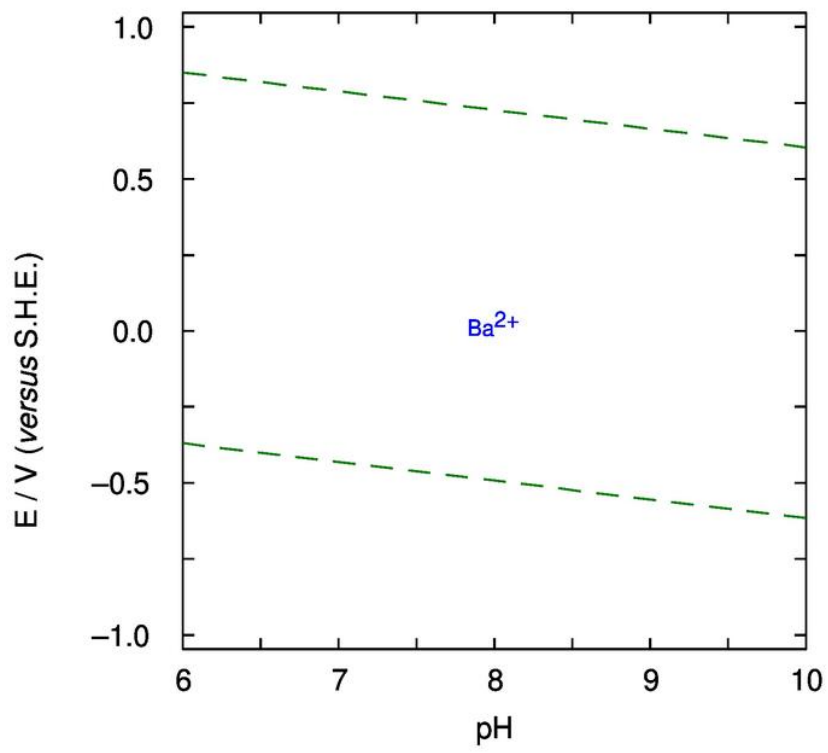

# BCd

## B



## Cd

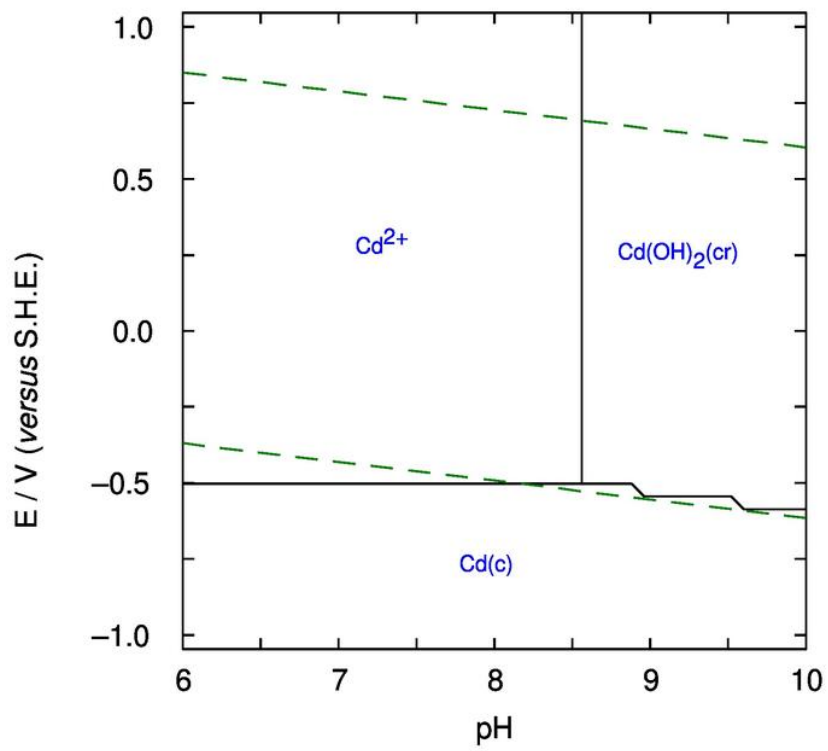

# B

## B



# Ce

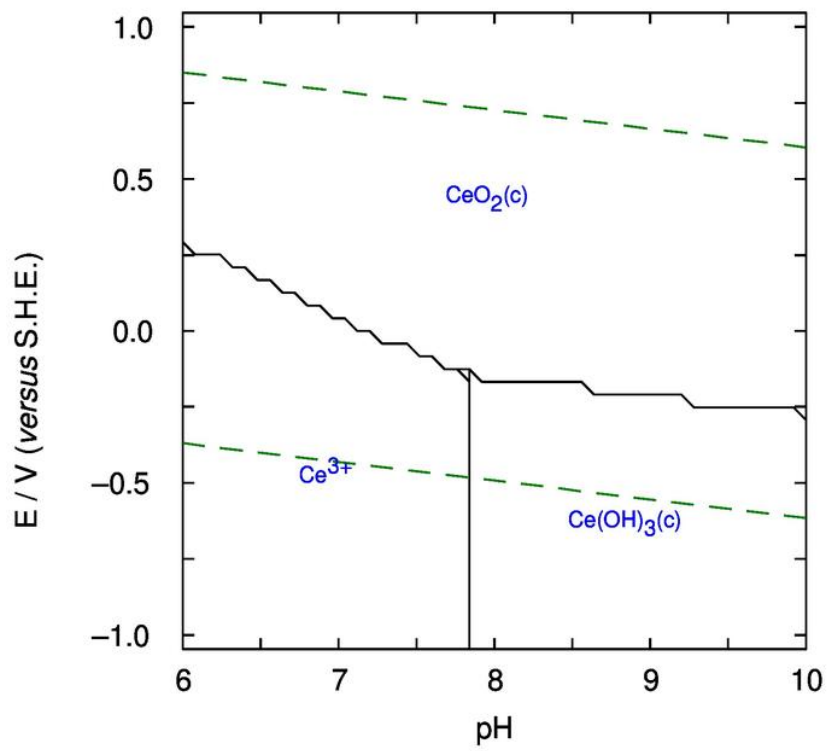

# B

## B



# Co



# B

## B



# Cr

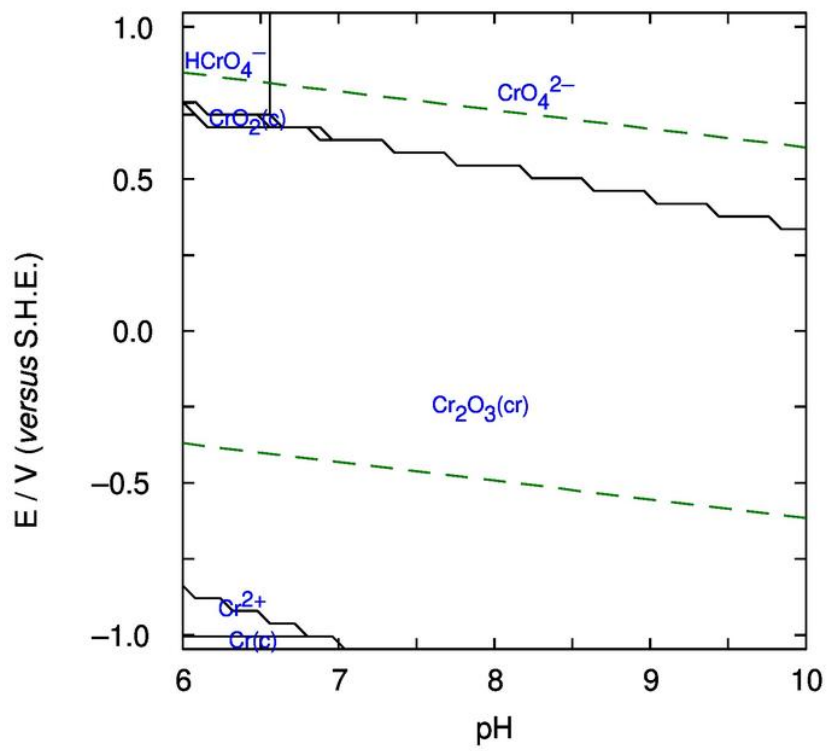



# BCu

## B



## Cu

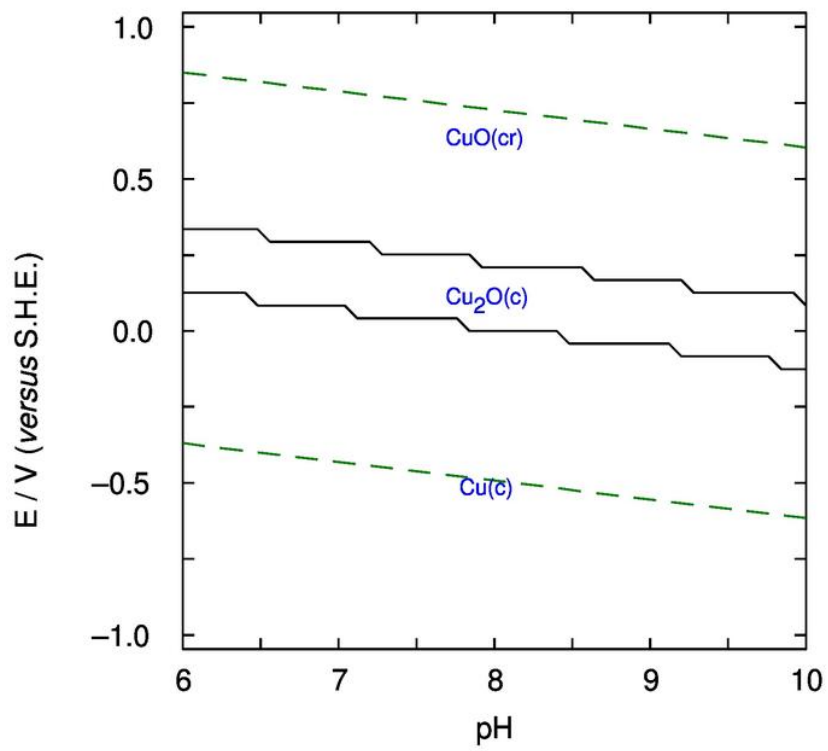

# BEu

## B

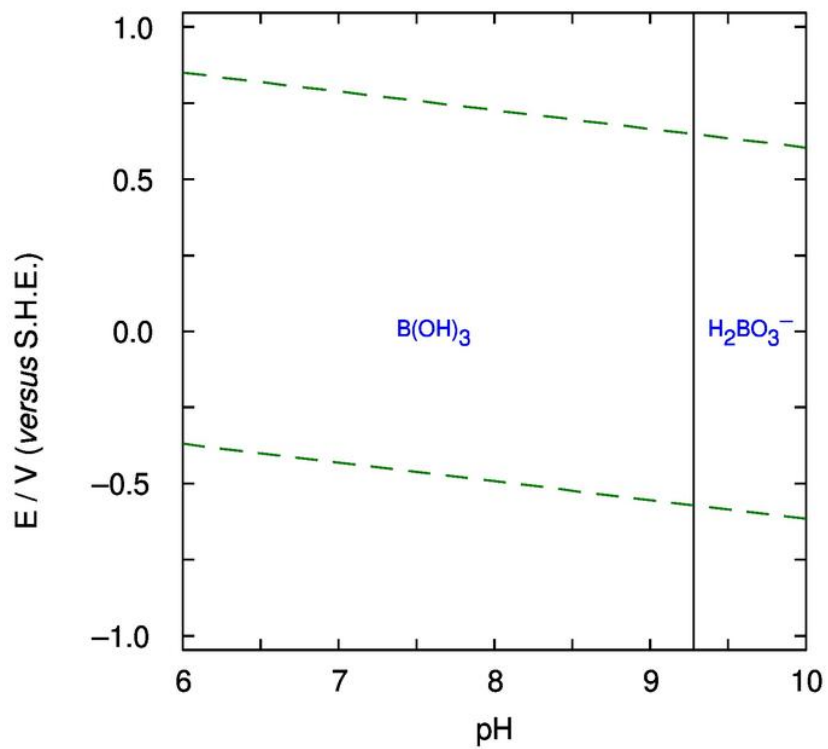

## Eu

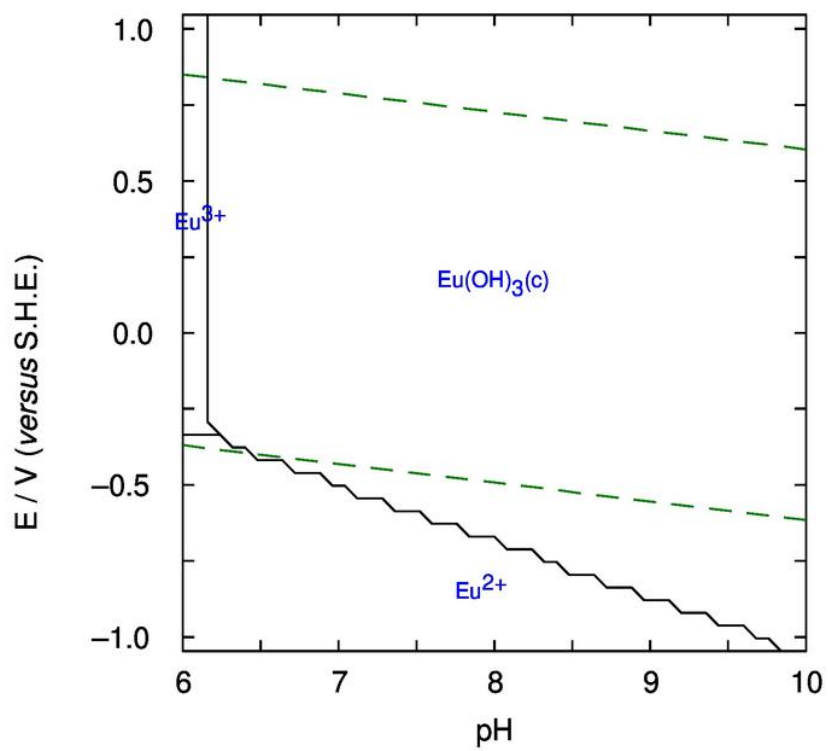

# BFe

## B



## Fe



# BGd

## B



## Gd

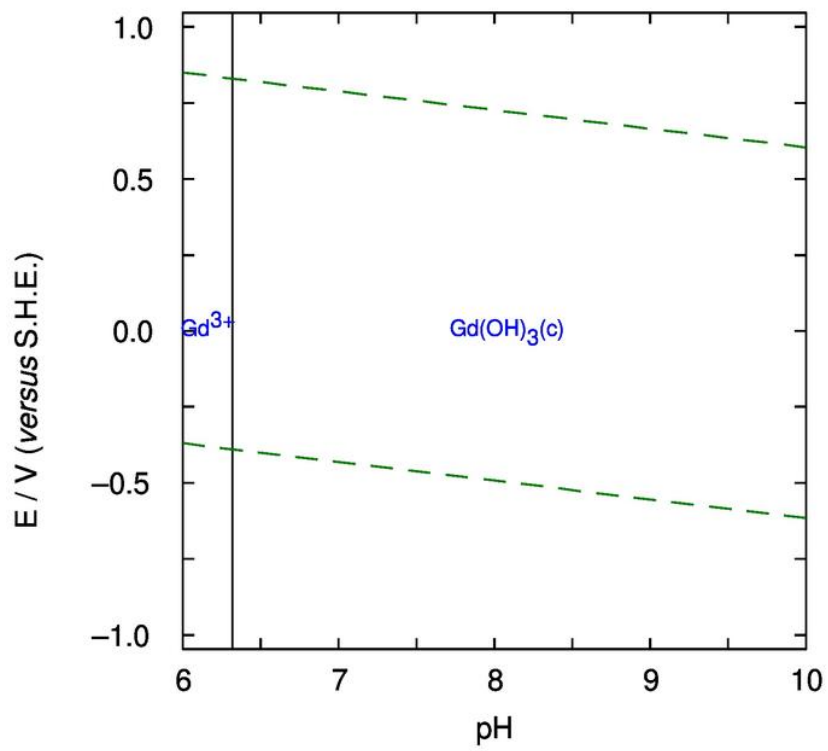

# BHg

## B



## Hg

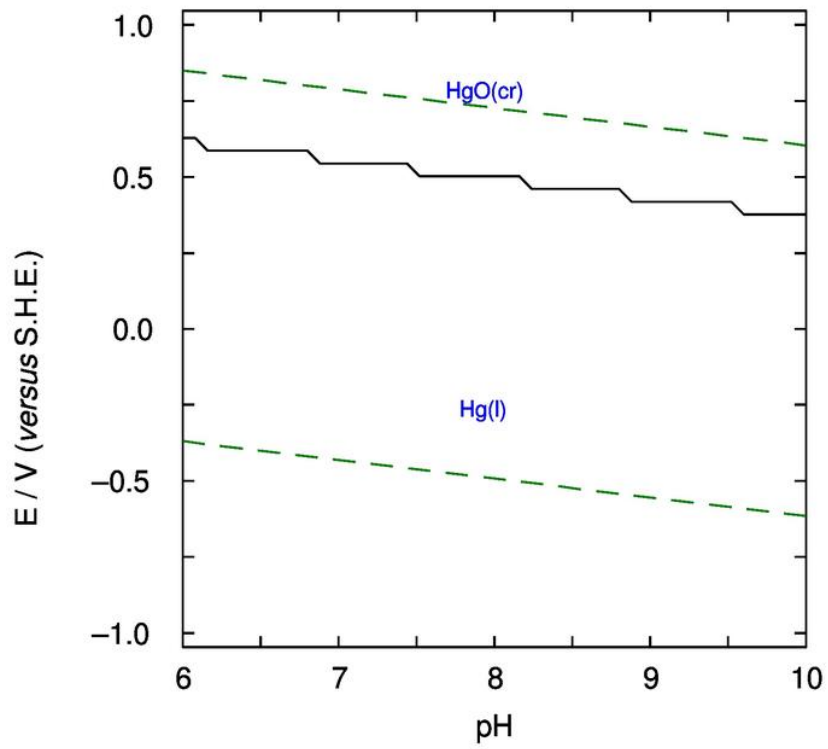

# BIn

## B



## In

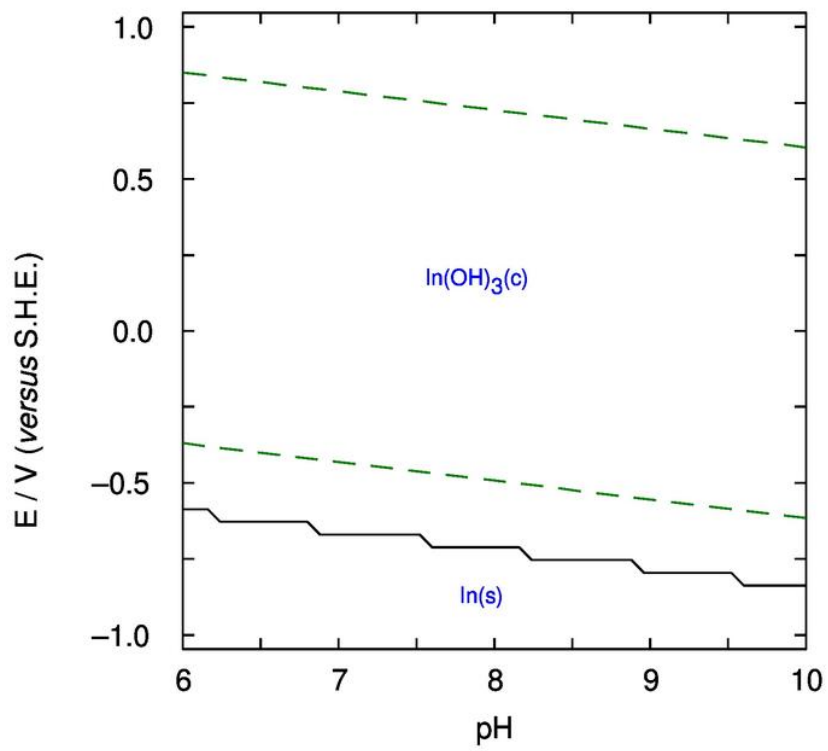

# BLa

## B



## La

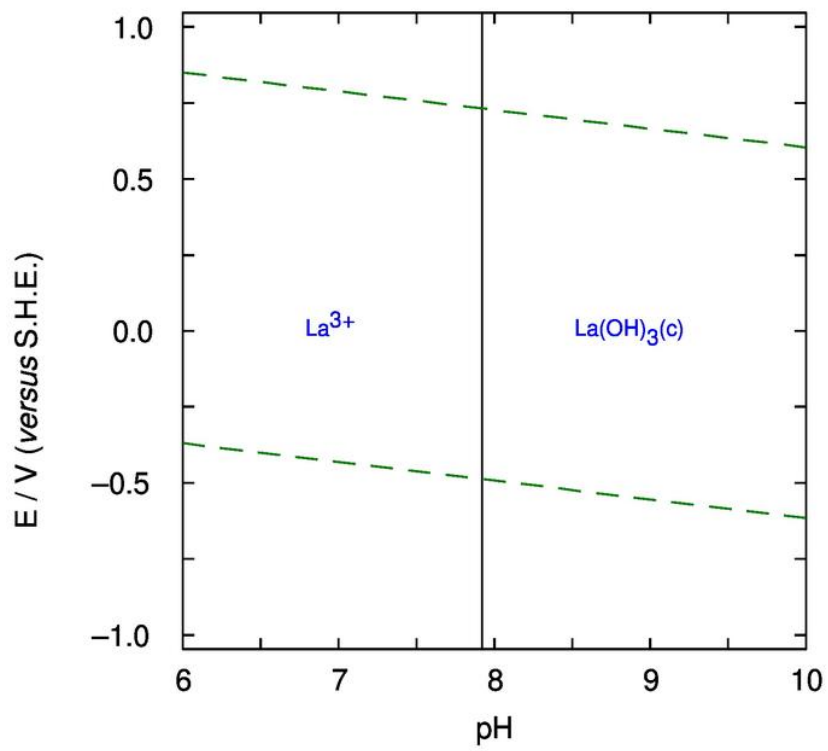

# BMn

## B



## Mn





# BMo

## B



## Mo



# BNd

## B



## Nd

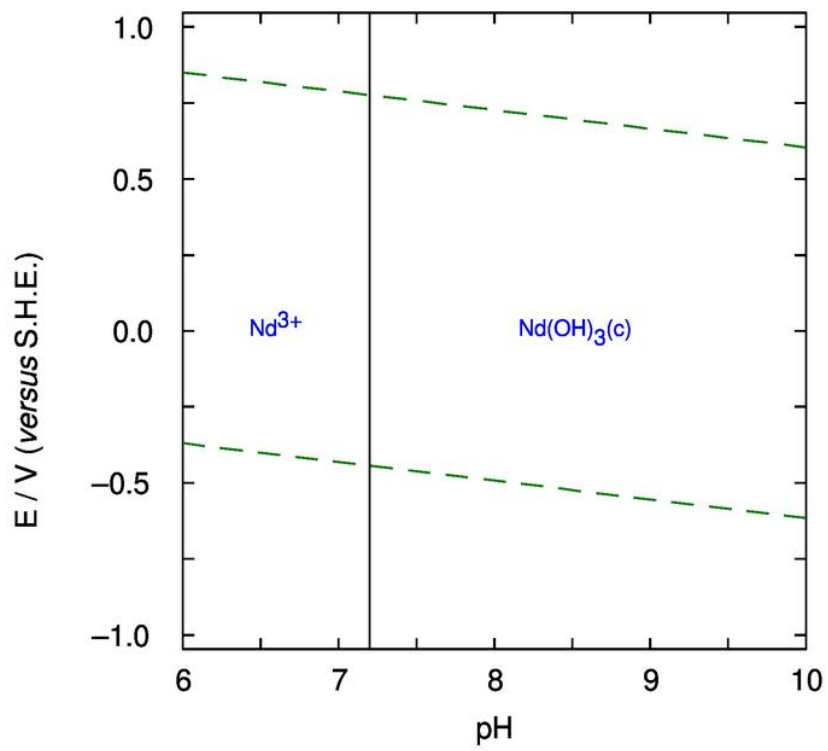

# BNi

## B



## Ni



# BPb

## B

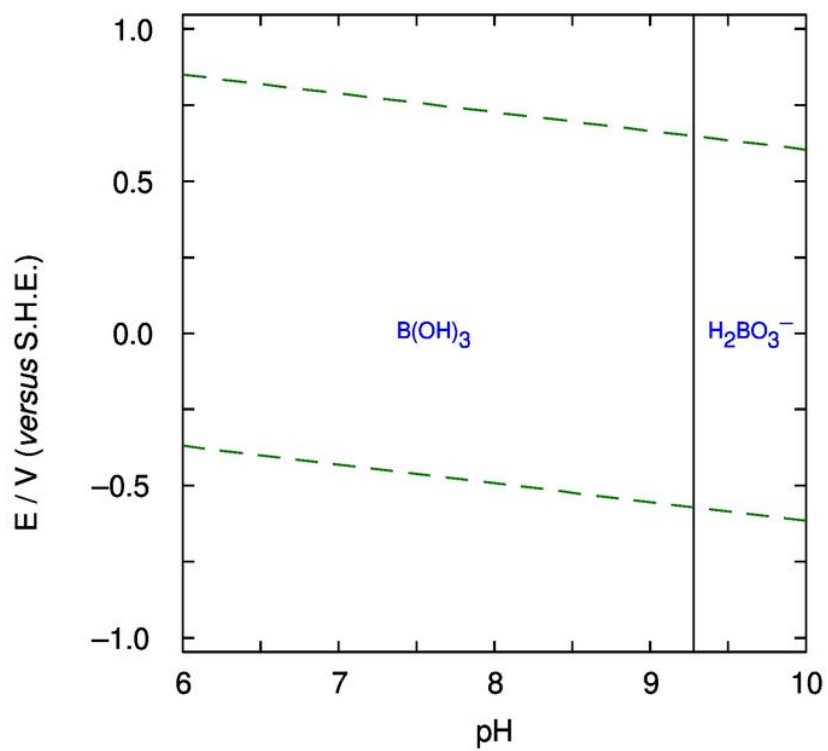

## Pb

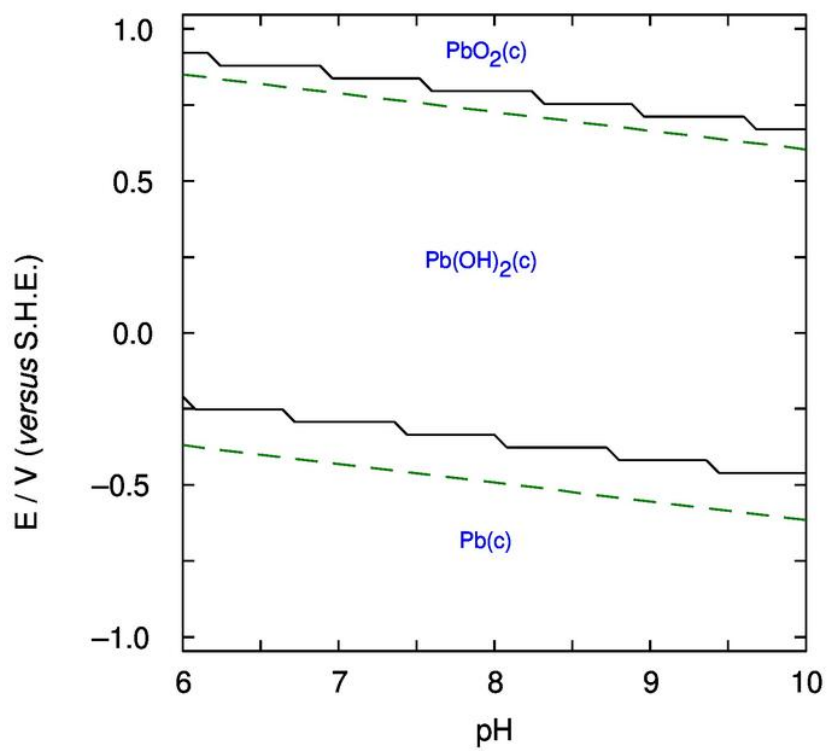

# BPr

## B



## Pr

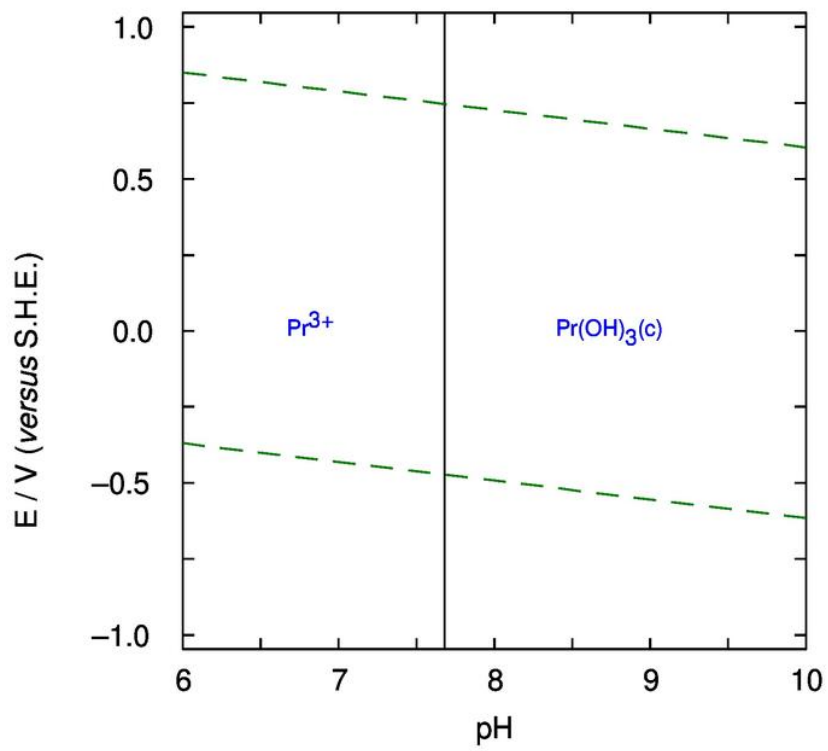

# BRb

## B



## Rb

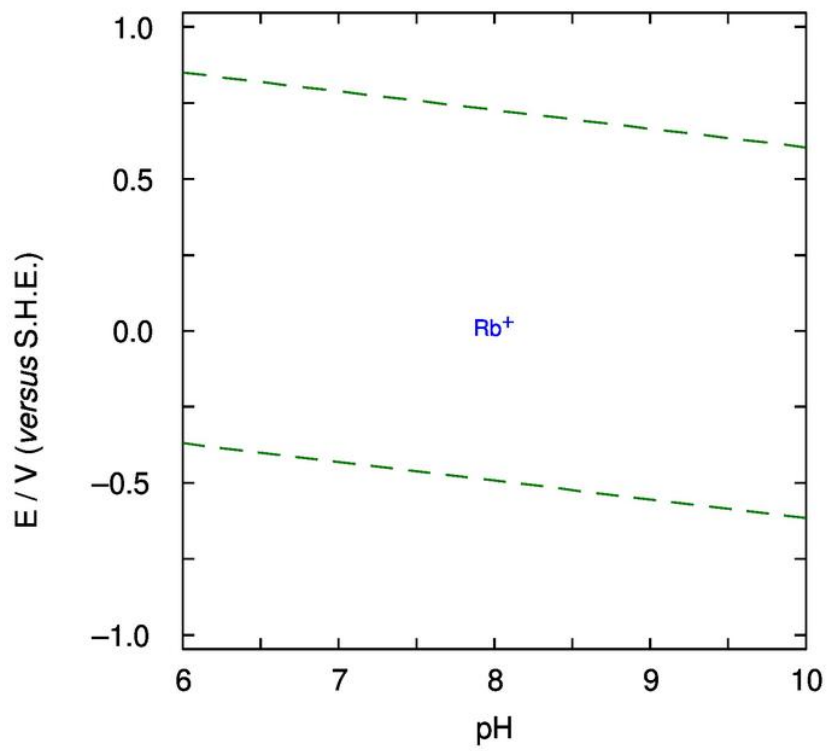

# BS

## B



## S

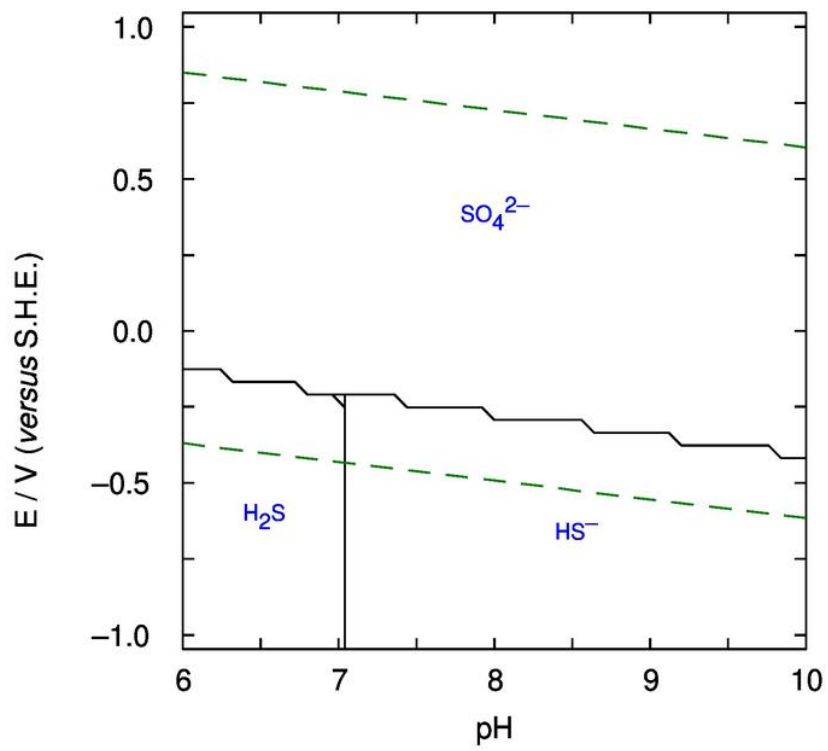

# BSe

## B



## Se





# BSm

## B



## Sm

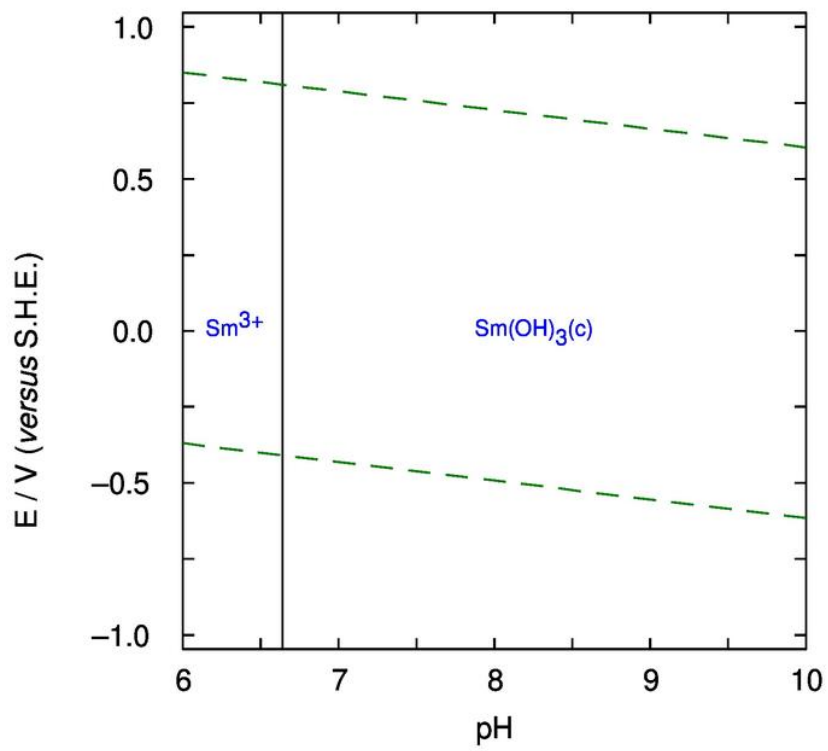

# B

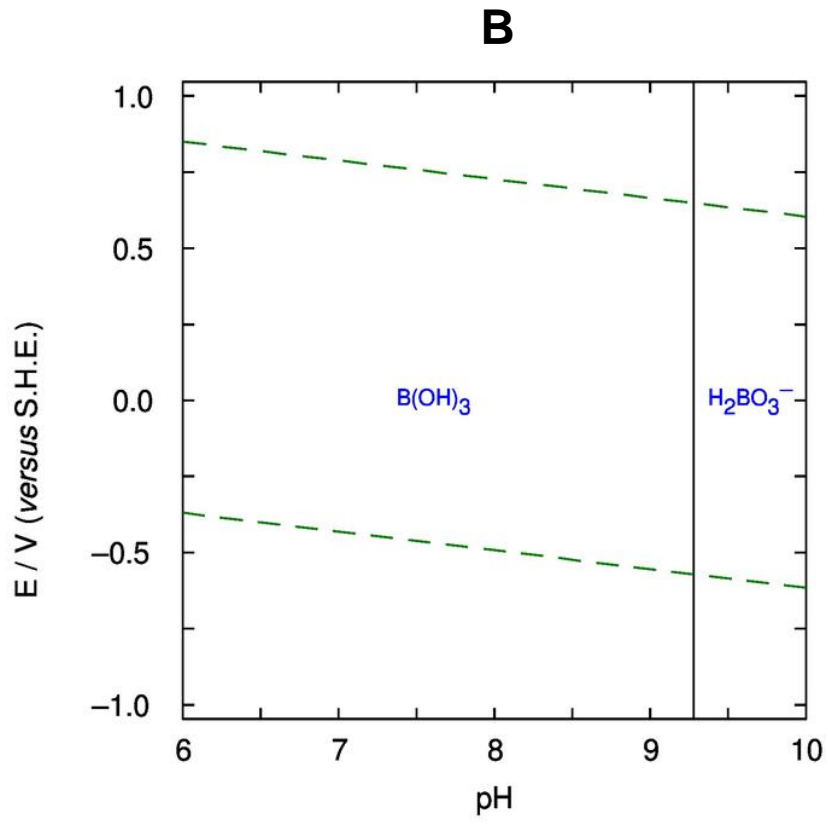

# Sn



# BSr

## B



## Sr



# BTe

## B



## Te

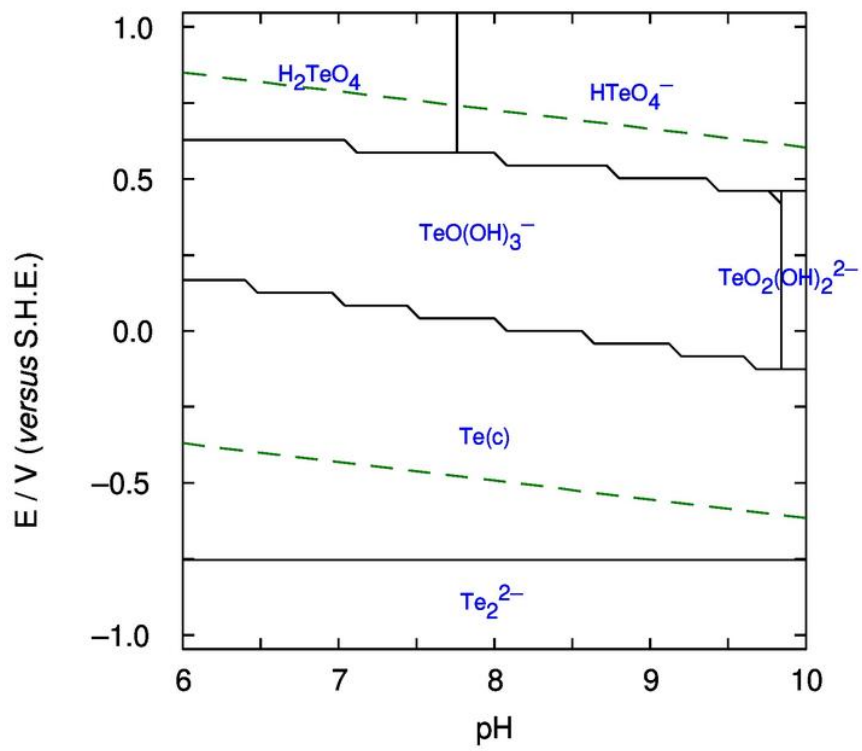

# BV

## B



## V



# BW

## B



## W

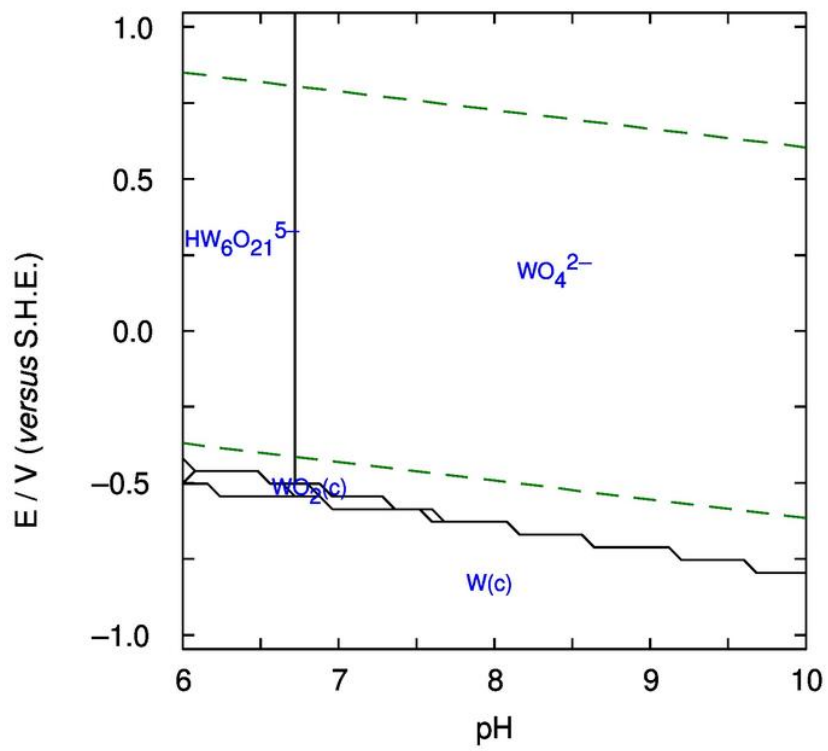

**BY**

**B**

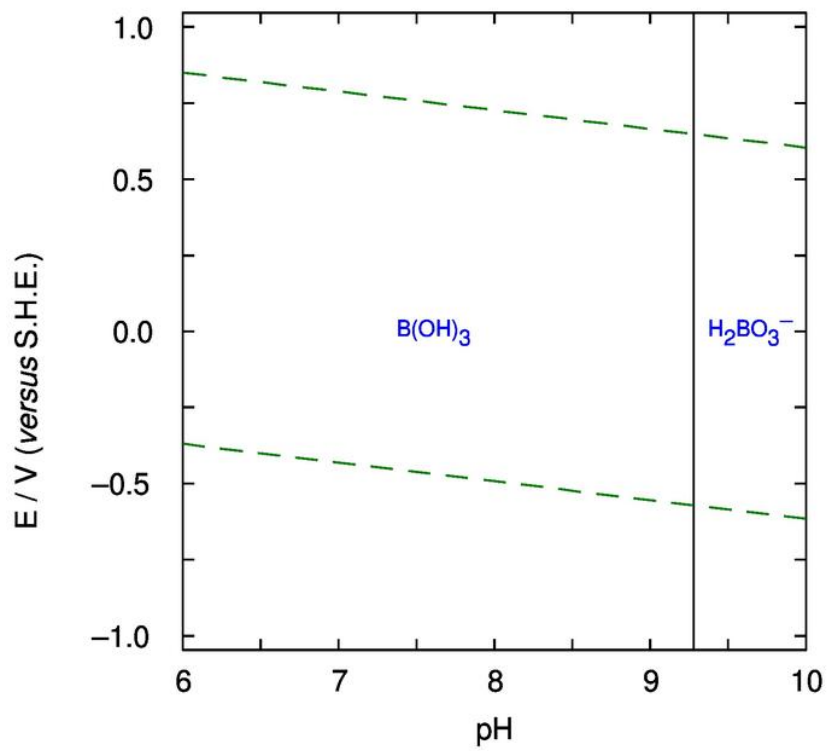

**Y**



# BZn

## B



## Zn





# BZr

## B



## Zr

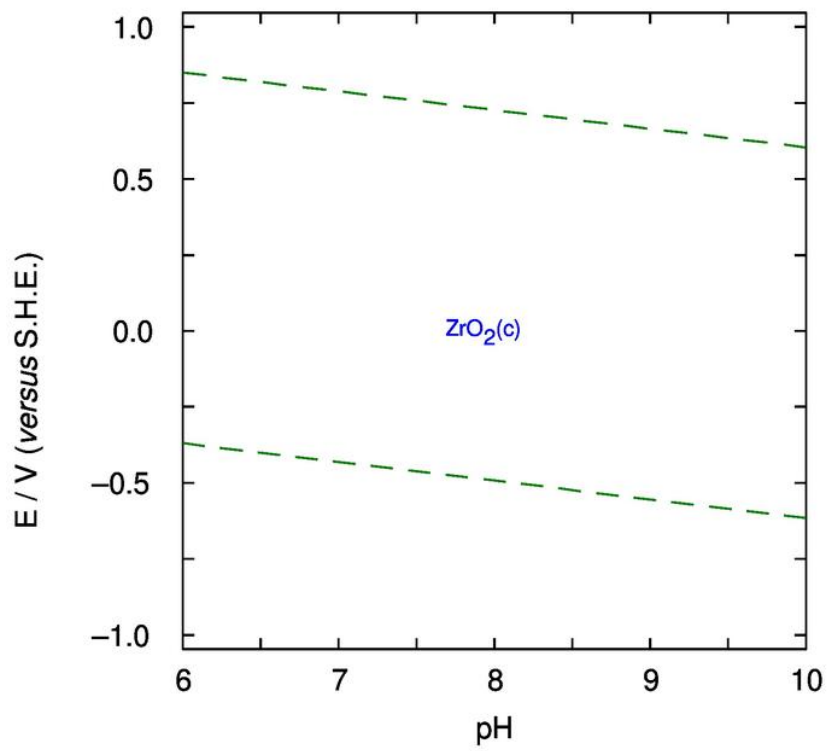

# BaAg

## Ba

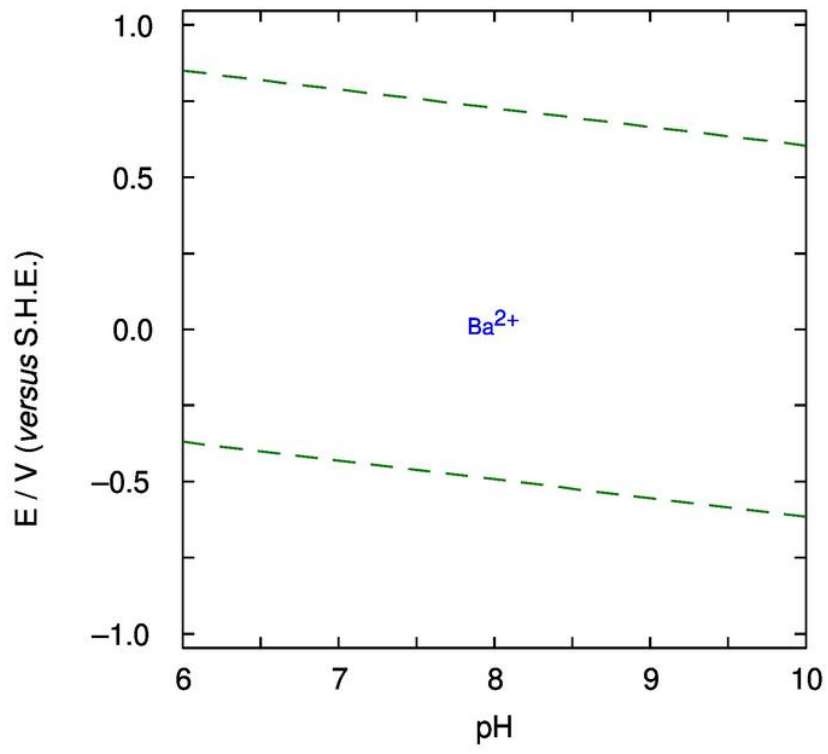

## Ag



# BaAl

## Ba



## Al

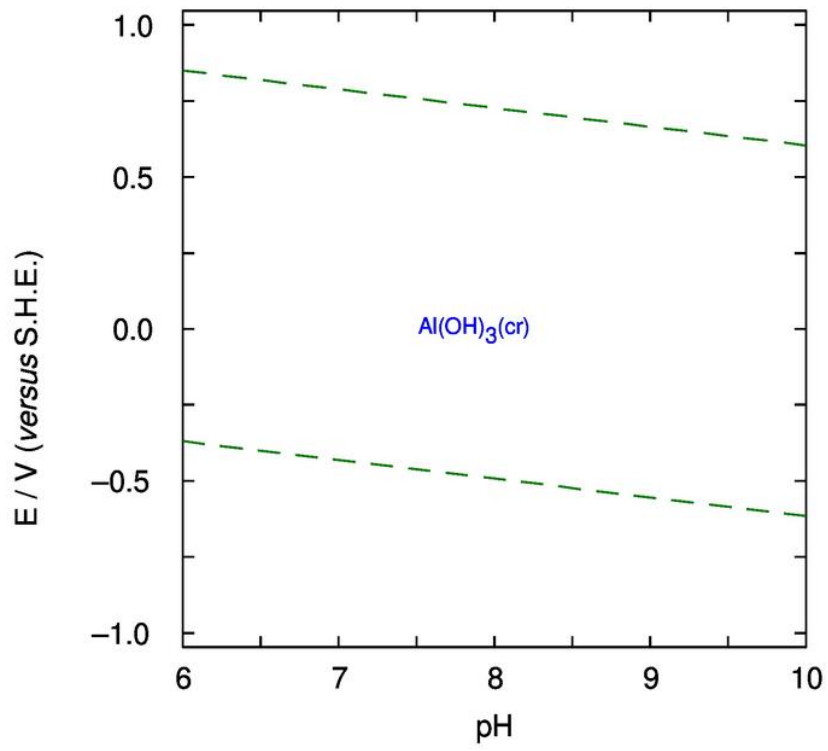

# BaCd

## Ba



## Cd



# BaCo

## Ba



## Co

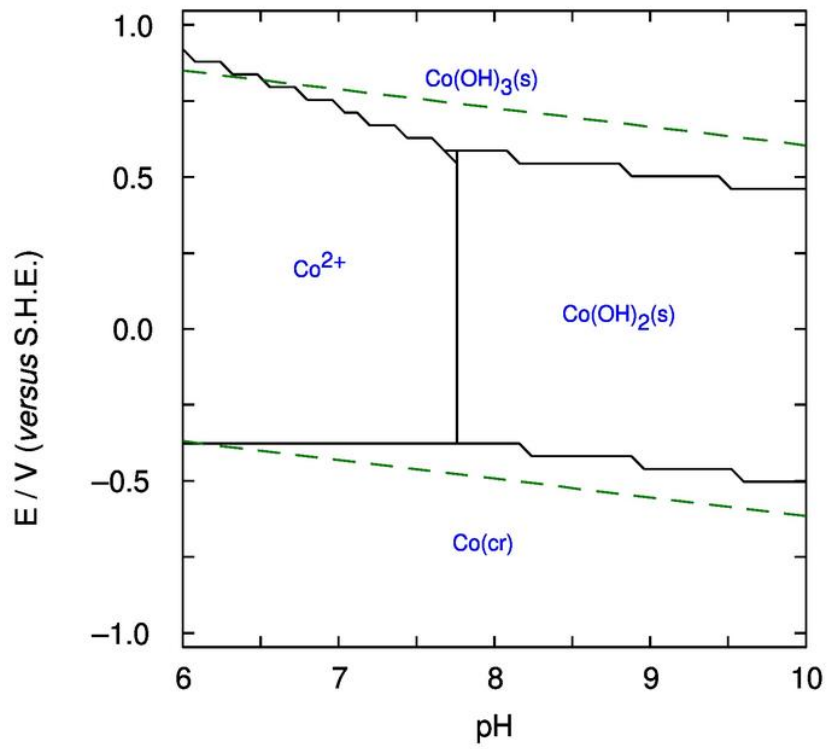

# BaCr

## Ba

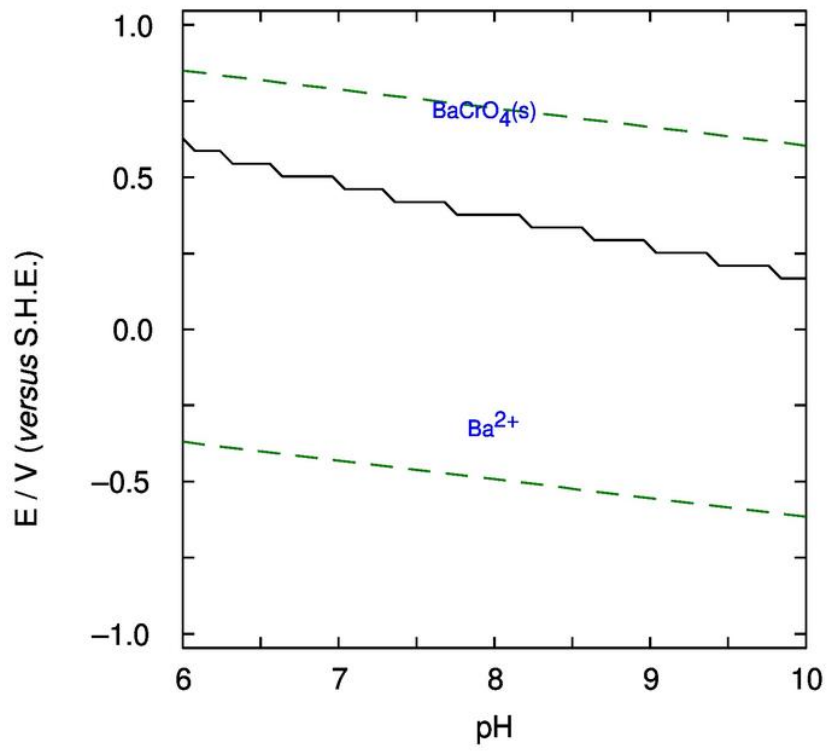

## Cr

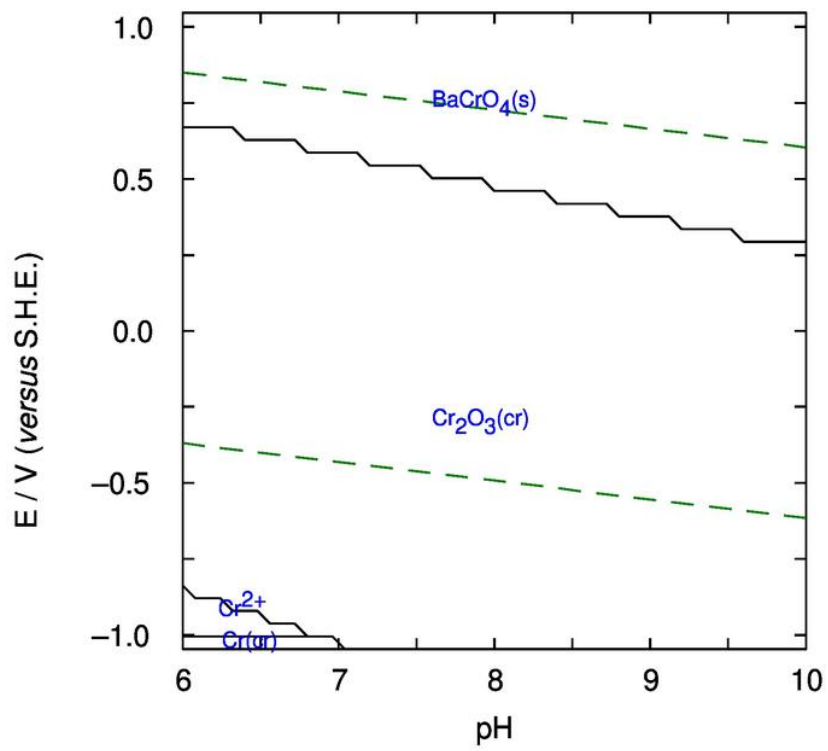

# BaCu

## Ba



## Cu



# BaFe

## Ba

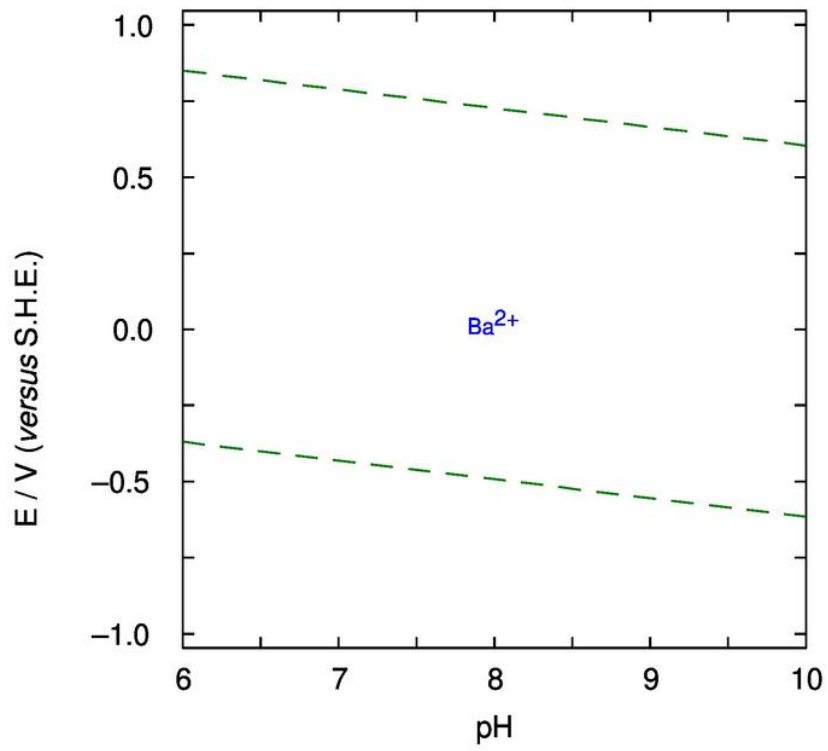

## Fe





# BaIn

## Ba



## In



# BaMn

## Ba

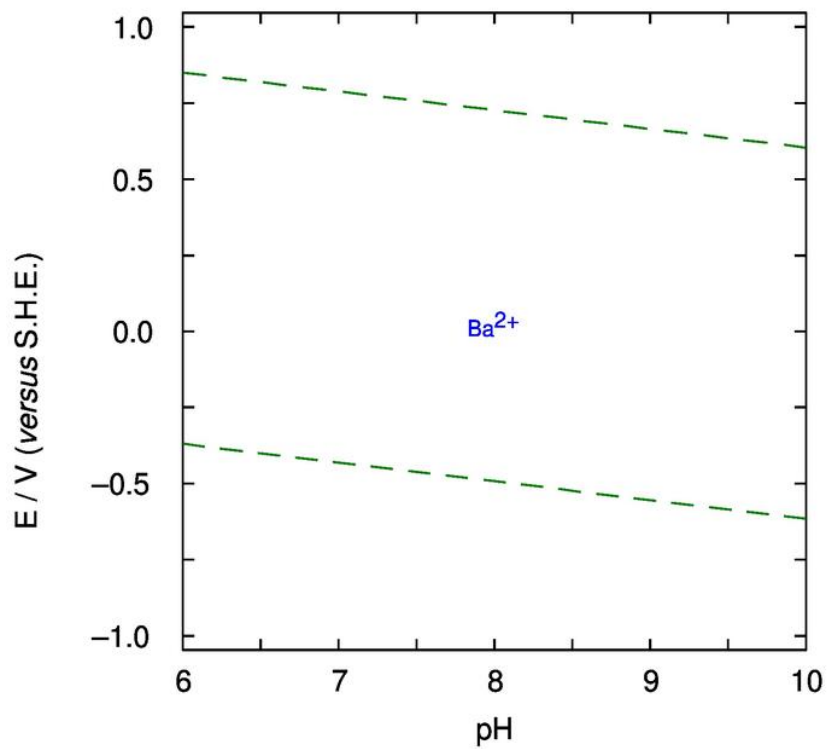

## Mn

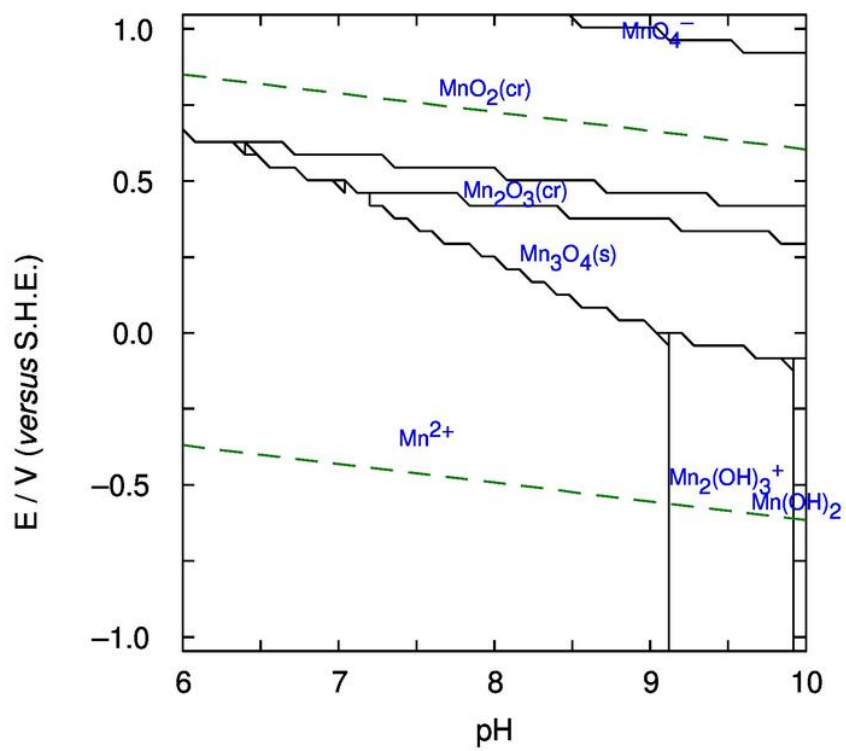

# BaMo

## Ba



## Mo



# BaNi

## Ba



## Ni



# BaRb

## Ba



## Rb



# BaS

## Ba

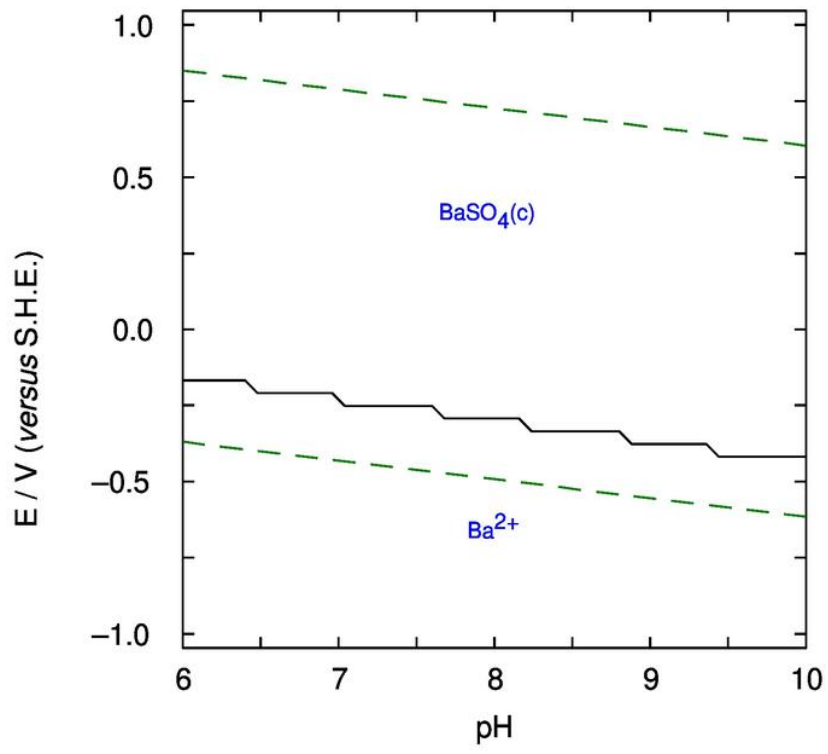

## S

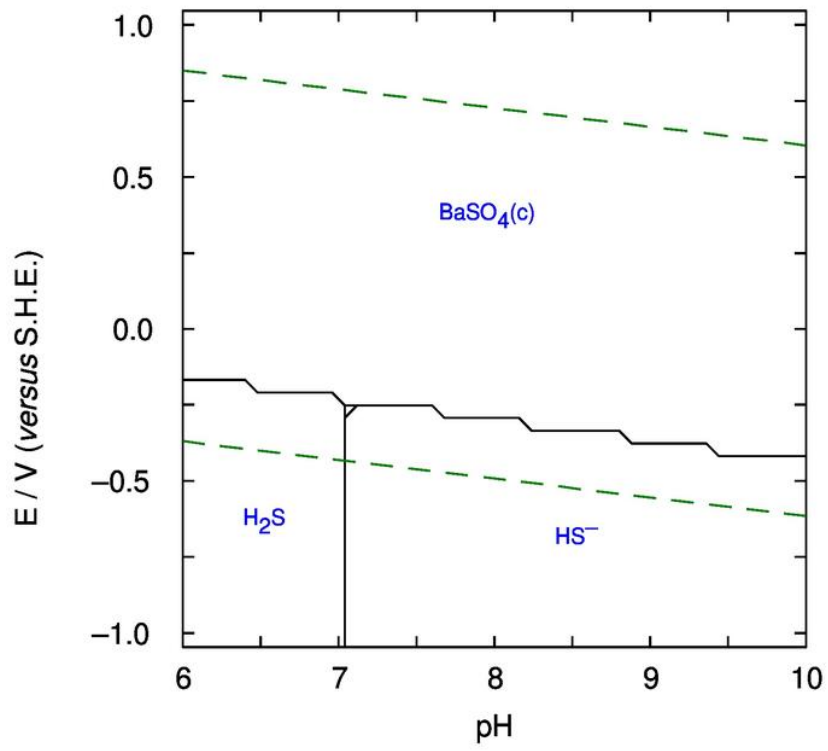

# BaSe

## Ba



## Se



# BaSn

## Ba



## Sn





# BaSr

## Ba



## Sr



# BaTe

## Ba



## Te



# BaV

## Ba



## V



# BaY

## Ba



## Y



# BaZn

## Ba



## Zn



# BaZr

## Ba



## Zr

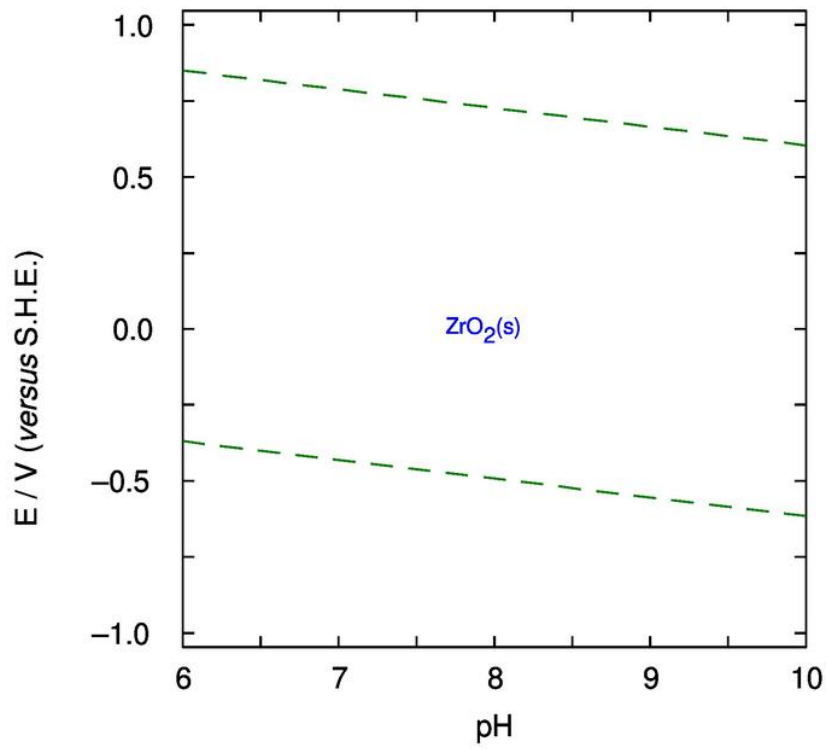

# CdAg

## Cd

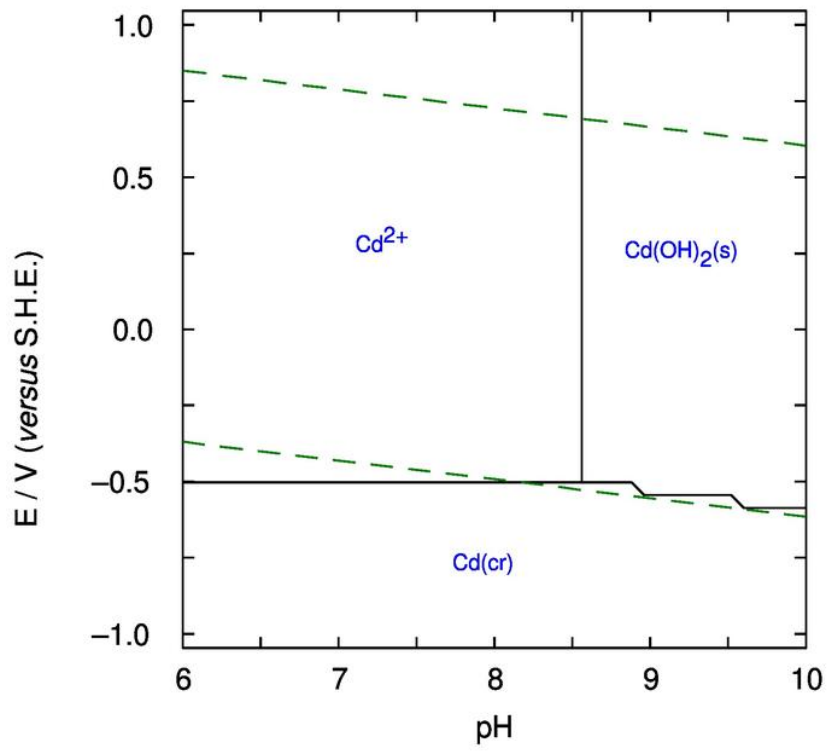

## Ag



# CdAl

## Cd

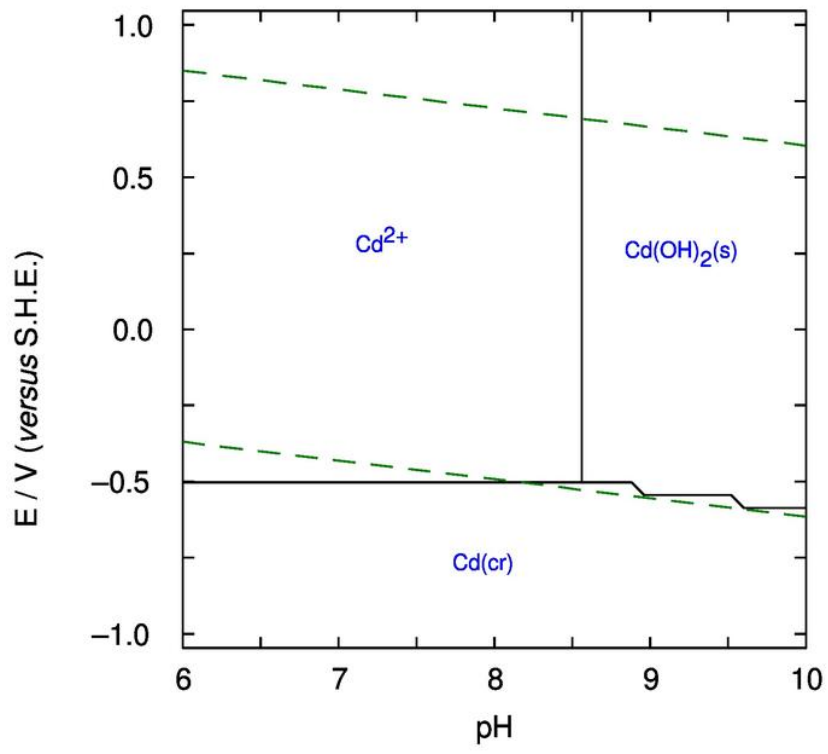

## Al





# CdCo

## Cd



## Co



# CdCr

## Cd



## Cr

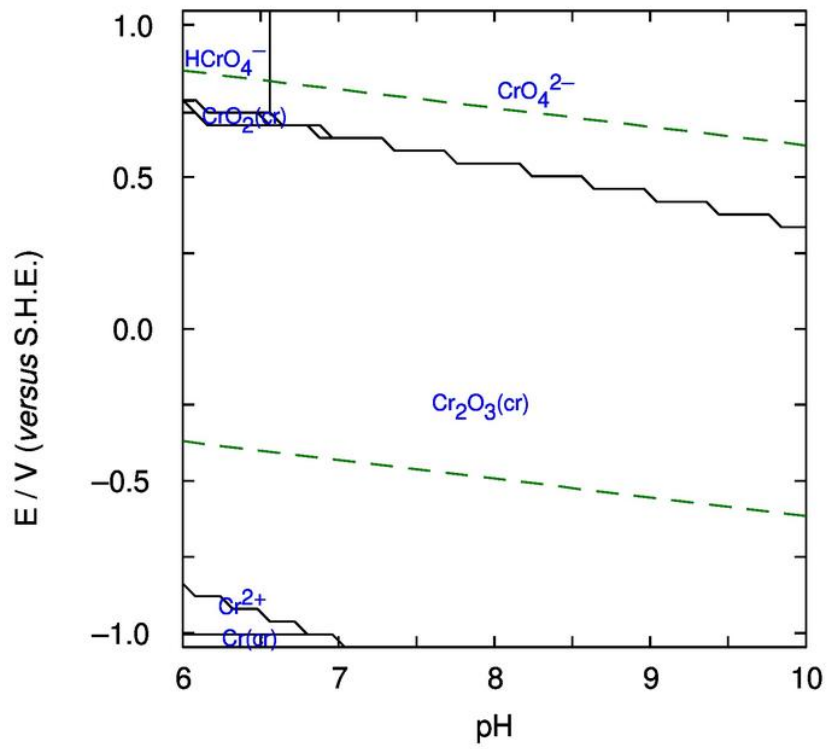

# CdCu

## Cd



## Cu



# CdFe

## Cd



## Fe

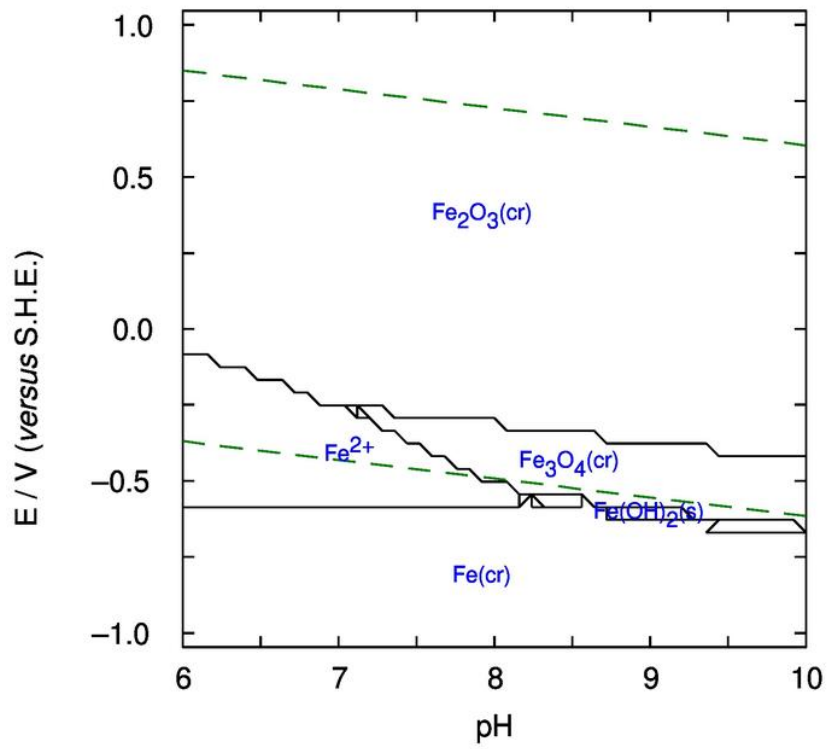

# CdMn

## Cd



## Mn

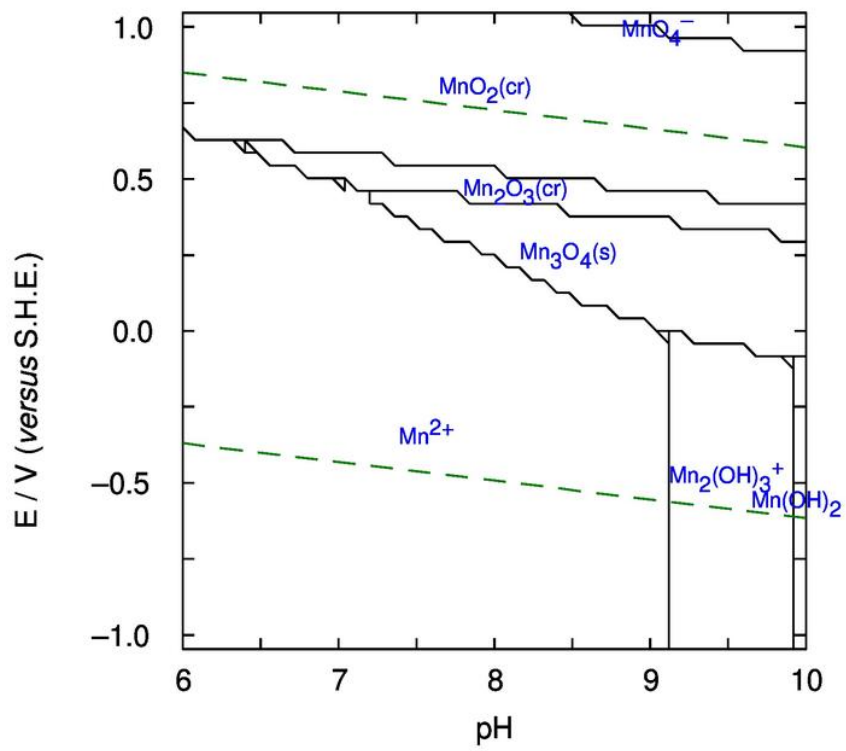

# CdMo

## Cd



## Mo



# CdNi

## Cd



## Ni



# CdRb

## Cd



## Rb





# CdS

## Cd

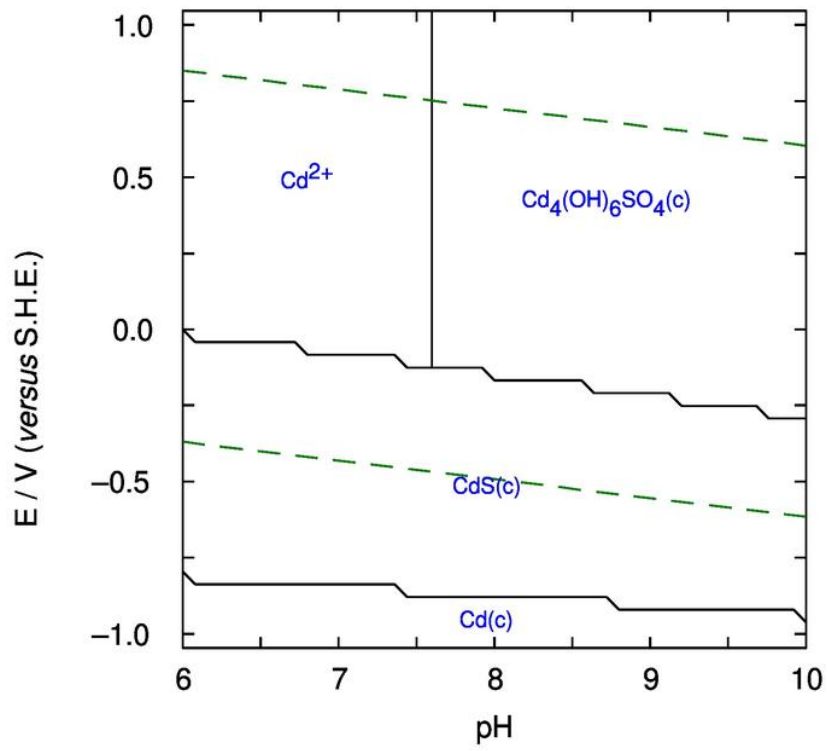

## S

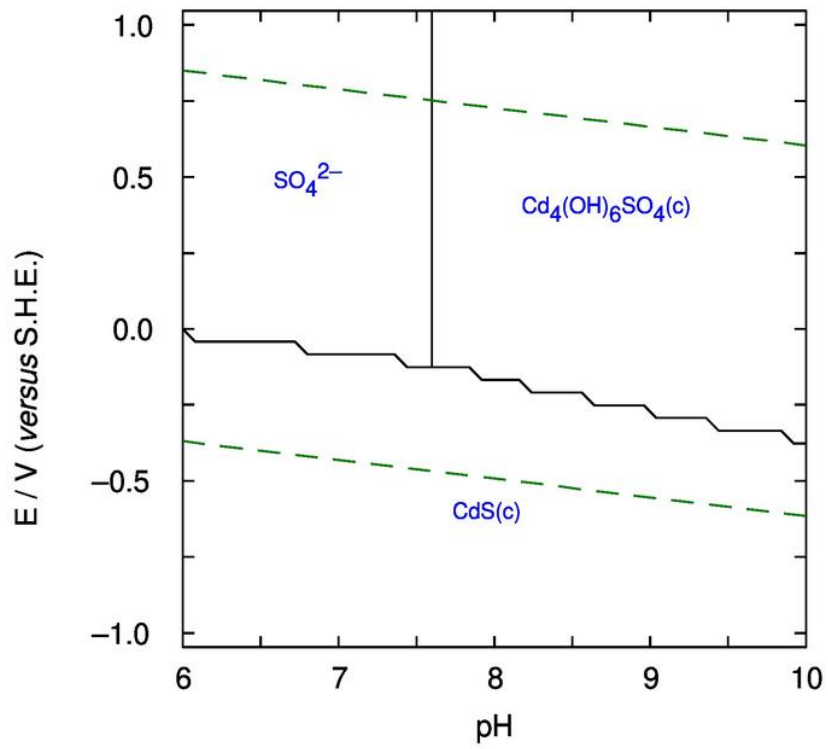

# CdSe

## Cd

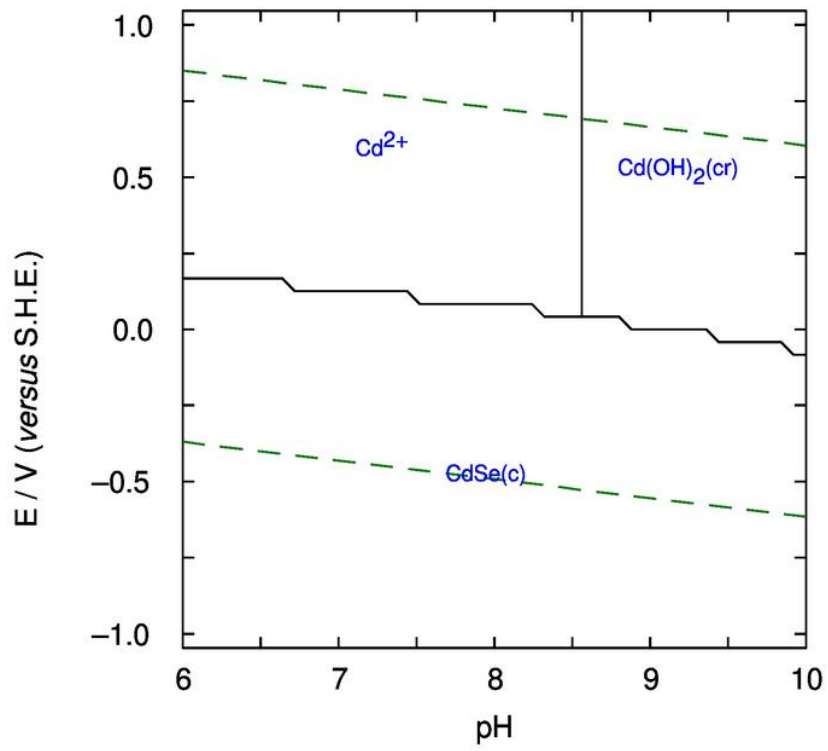

## Se

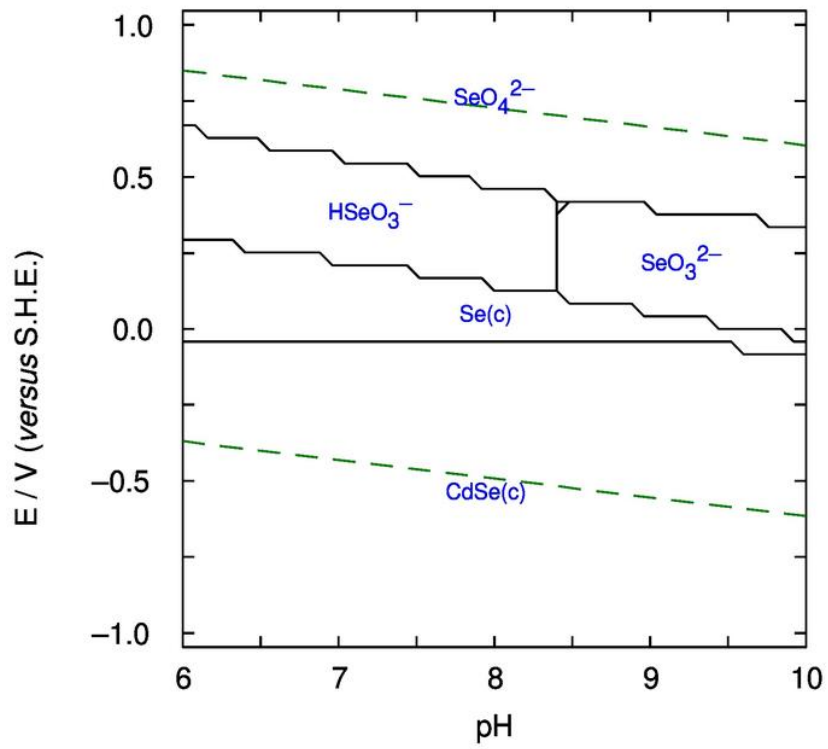

# CdSr

## Cd



## Sr

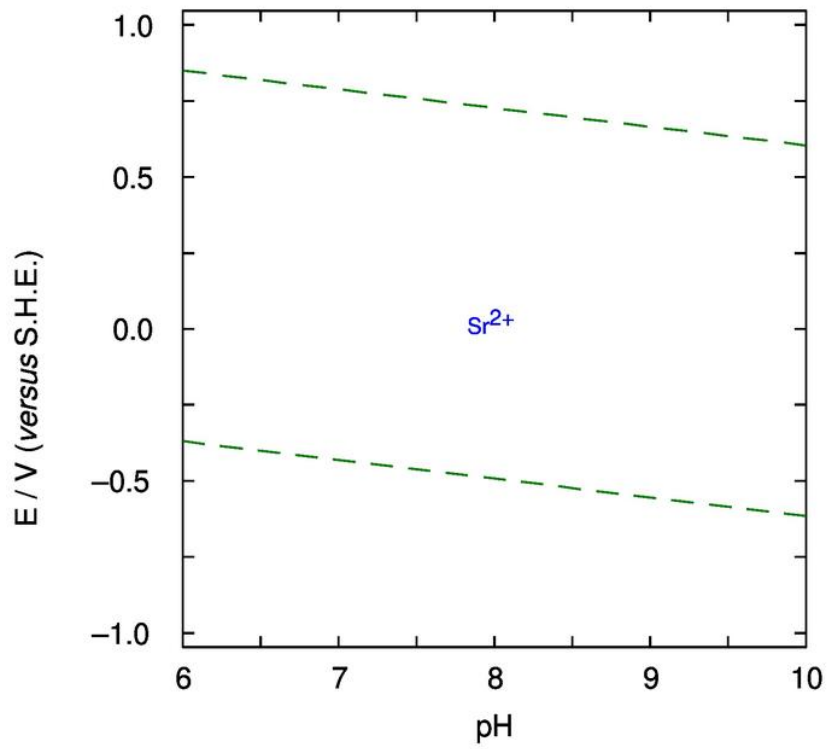

# CdV

## Cd



## V



# CdY

## Cd

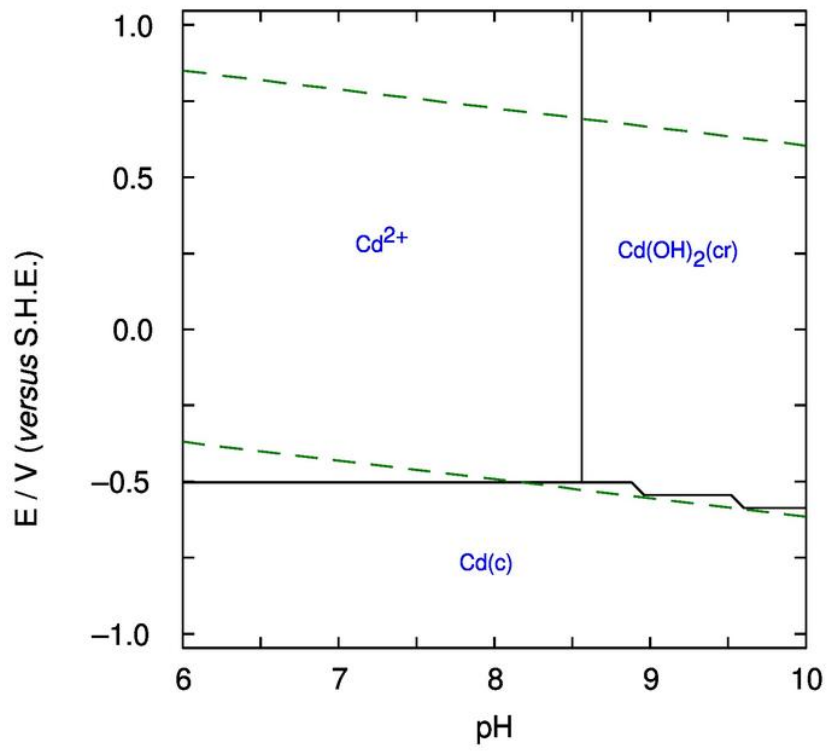

## Y



# CdZn

## Cd



## Zn



# CdZr

## Cd



## Zr



# CeAg

## Ce

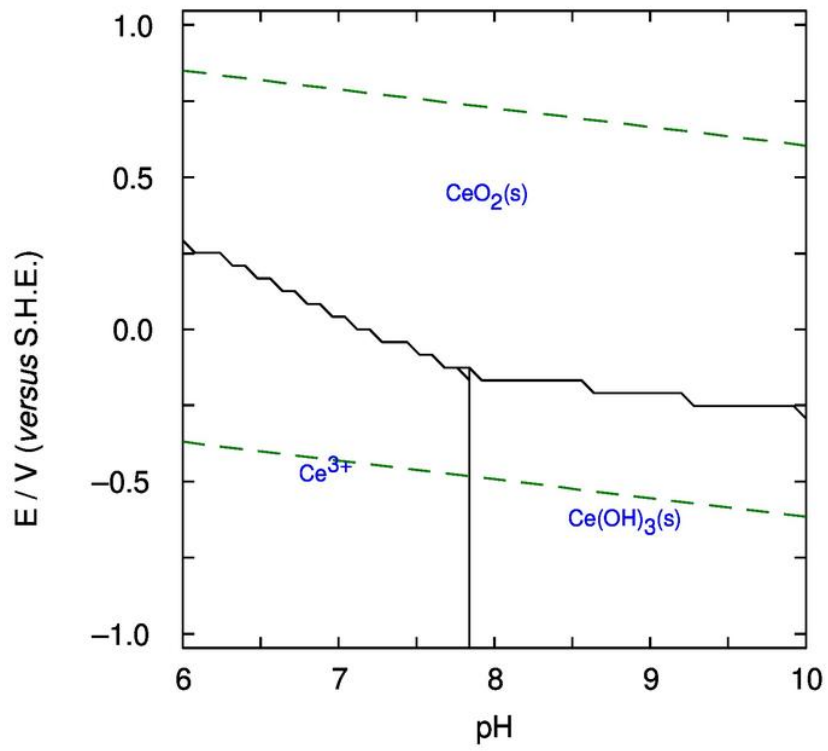

## Ag





# CeAl

## Ce



## Al

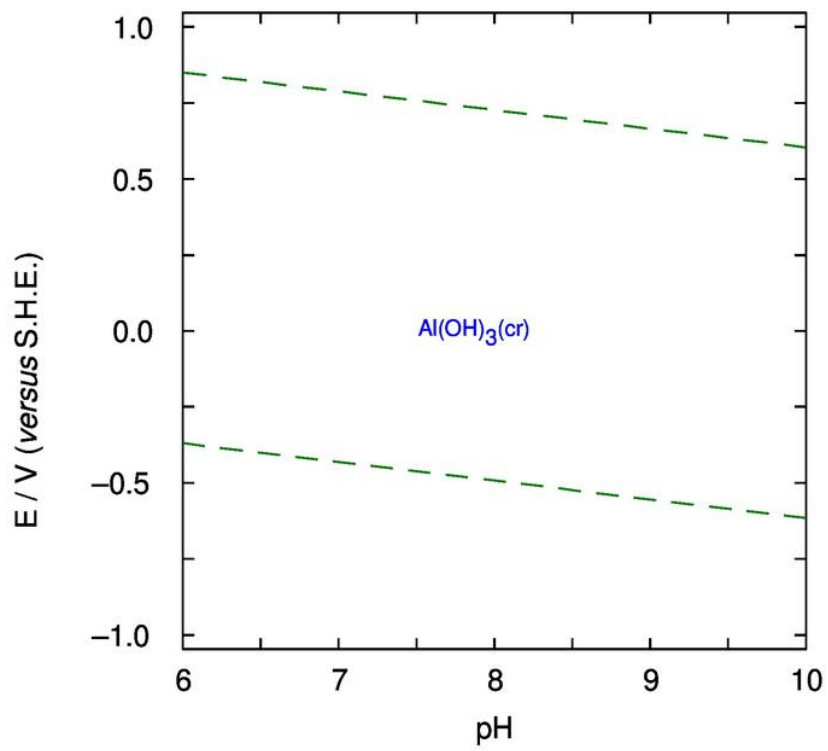

# CeBa

## Ce



## Ba



# CeCd

## Ce



## Cd



# CeCo

## Ce



## Co



# CeCr

## Ce



## Cr



# CeCu

## Ce



## Cu



# CeFe

## Ce



## Fe



# CeIn

## Ce



## In

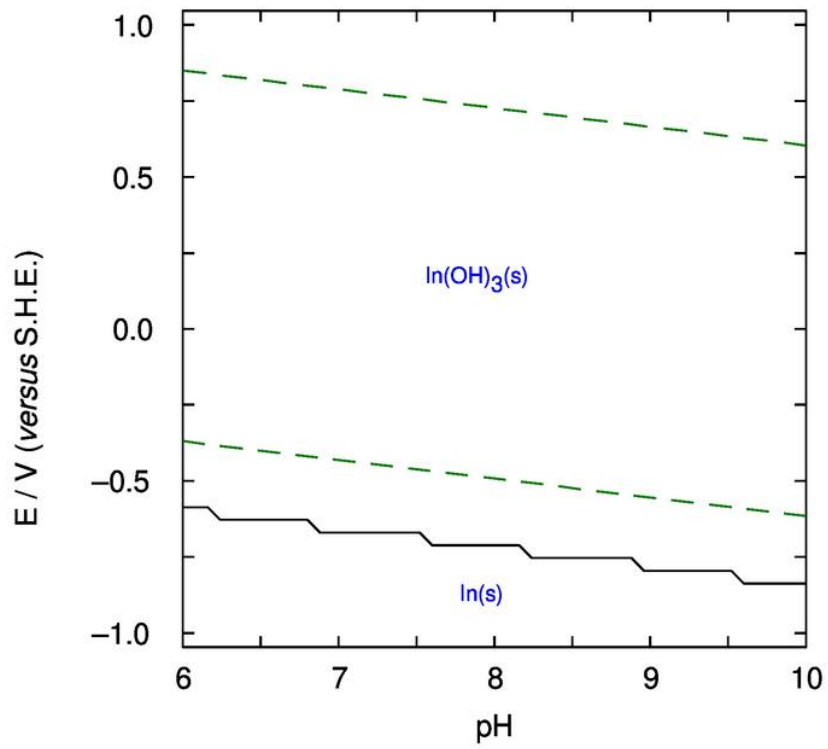



# CeLa

## Ce



## La

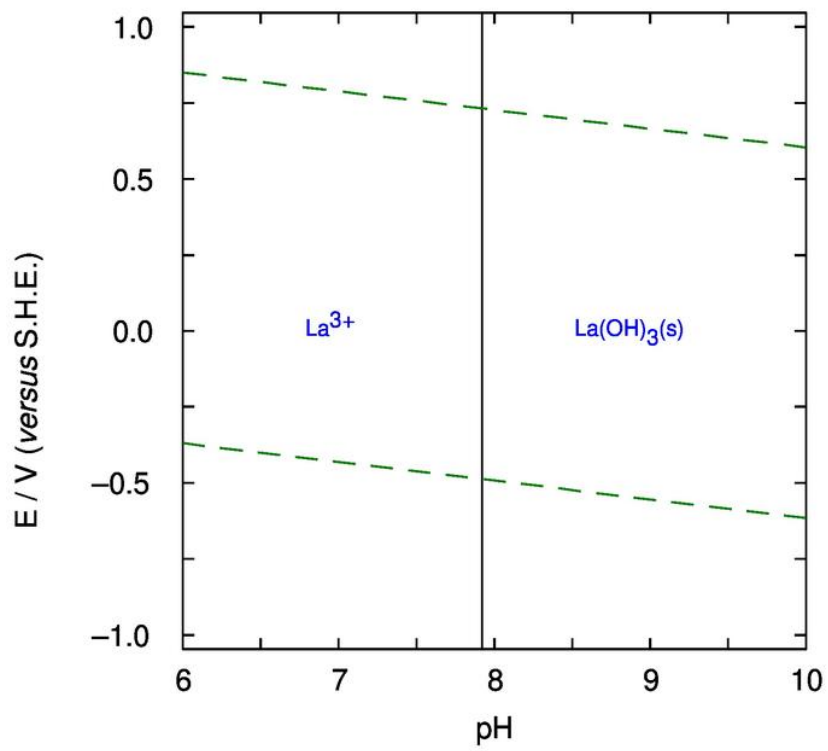

# CeMn

## Ce



## Mn



# CeMo

## Ce



## Mo



# CeNi

## Ce



## Ni



# CeRb

## Ce



## Rb



# CeS

## Ce

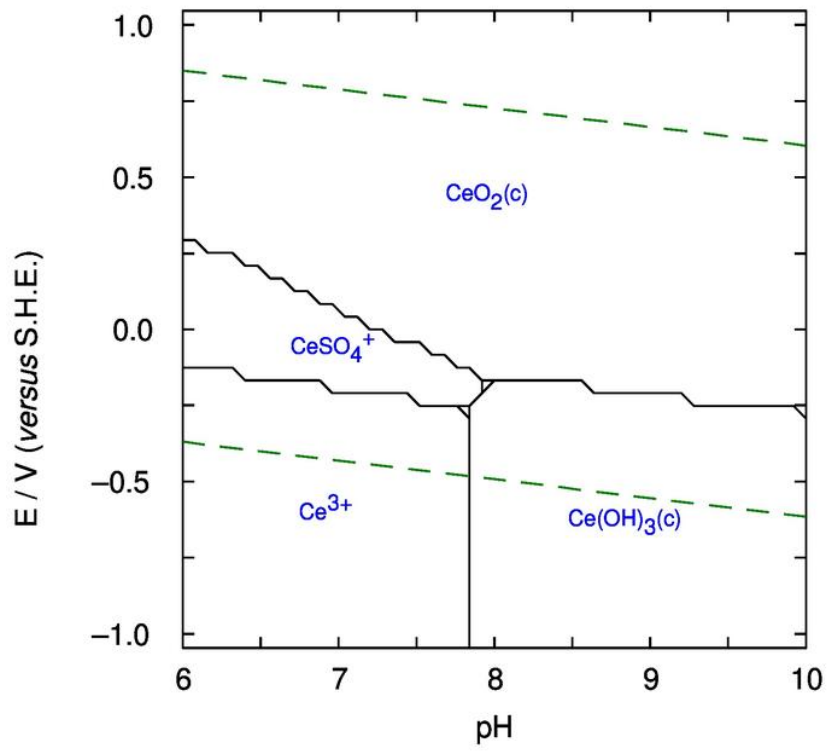

## S

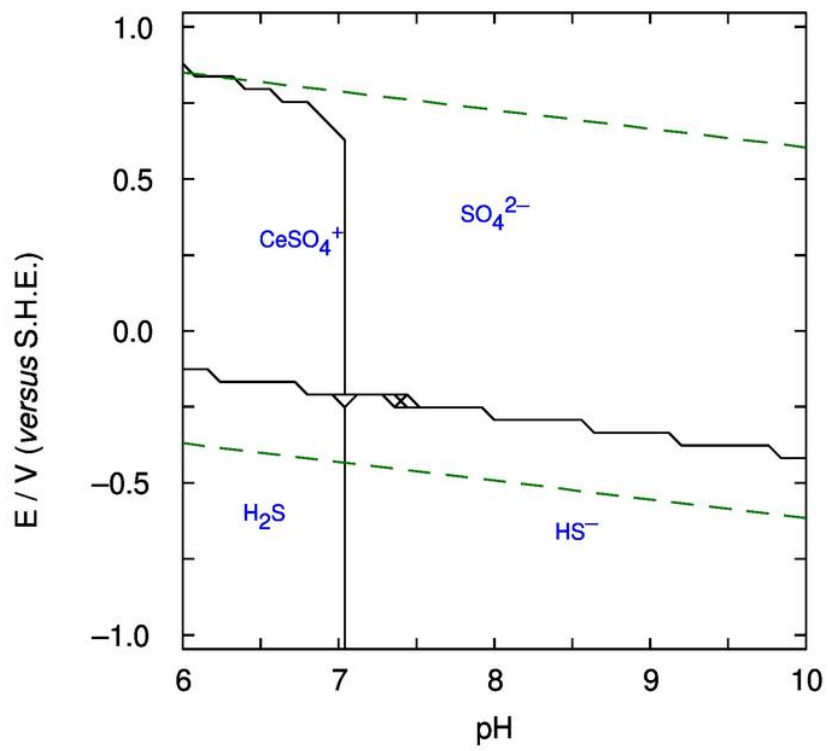

# CeSe

## Ce



## Se

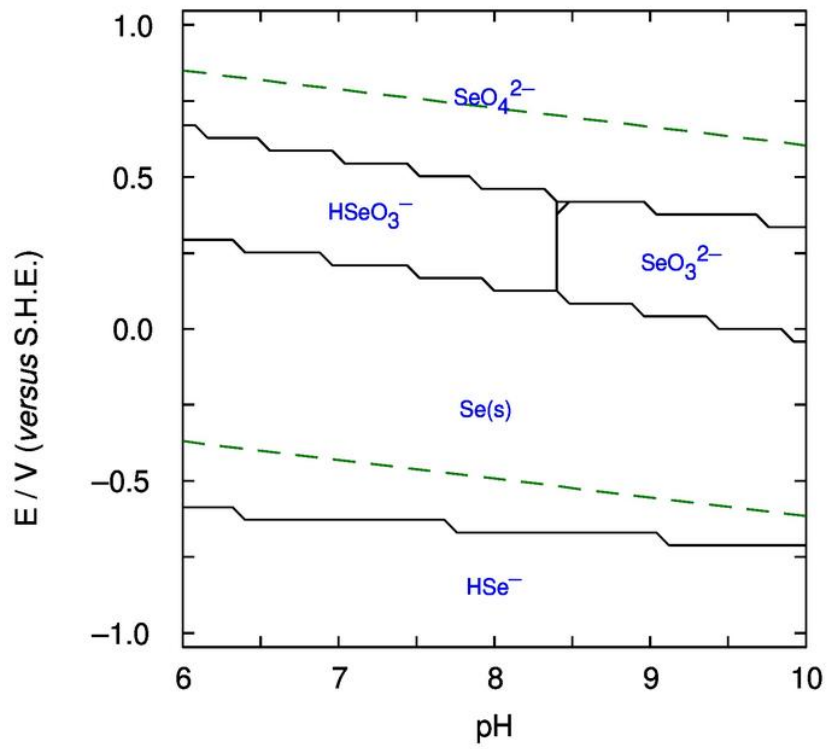

# CeSn

## Ce



## Sn





# CeSr

## Ce

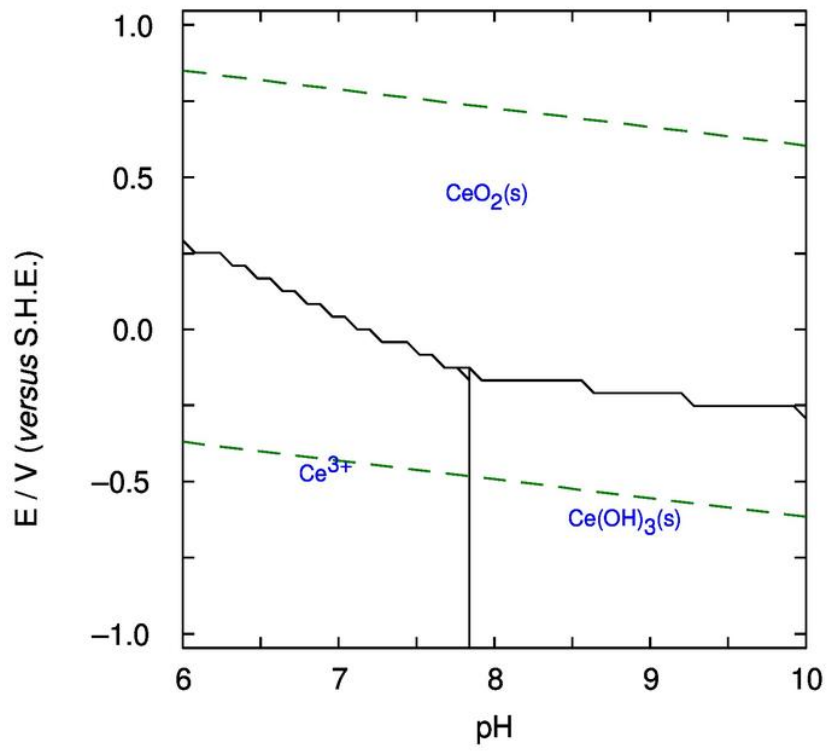

## Sr



# CeTe

## Ce



## Te



# CeV

## Ce



## V



# CeY

## Ce



## Y



# CeZn

## Ce



## Zn



# CeZr

## Ce



## Zr



# CoFe

## Co

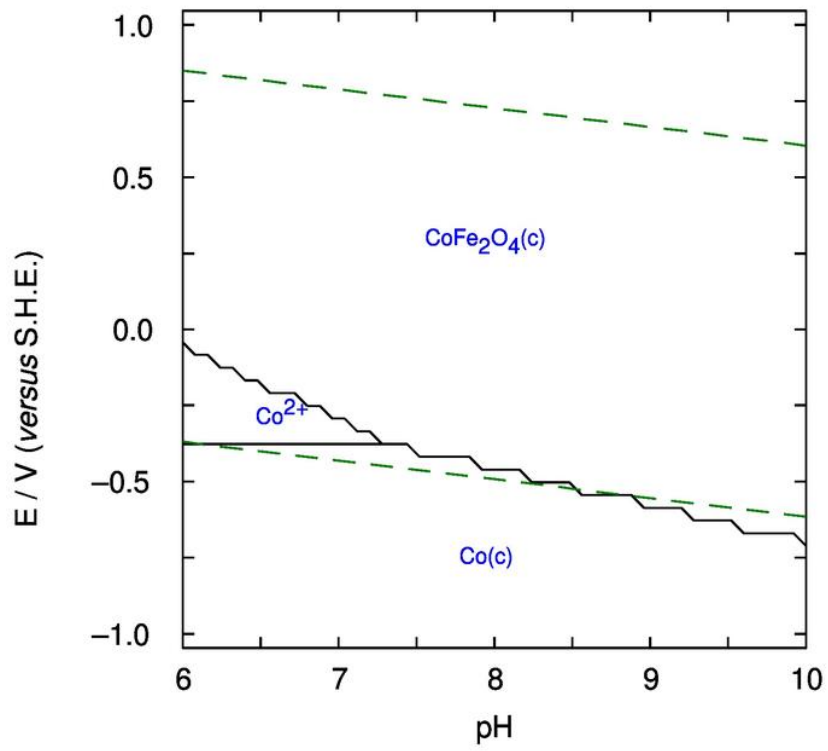

## Fe

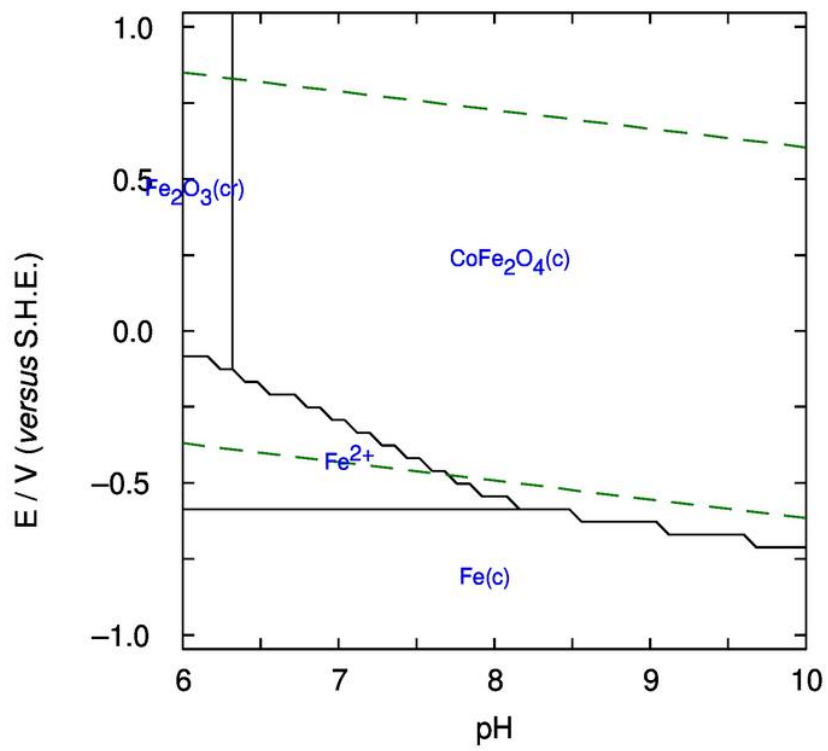

# CoMn

## Co

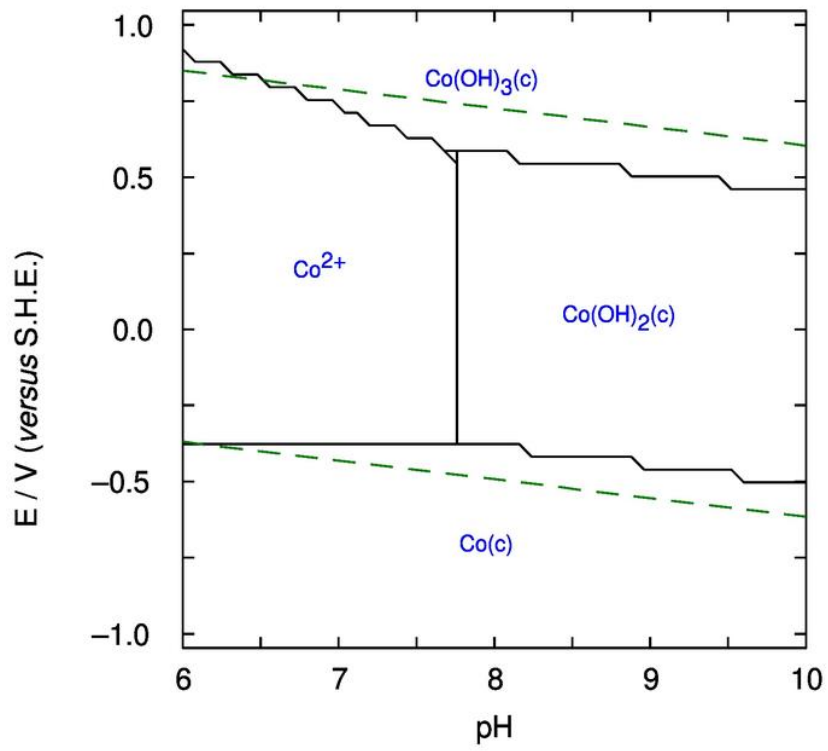

## Mn





# CoRb

## Co



## Rb



# CoS

## Co

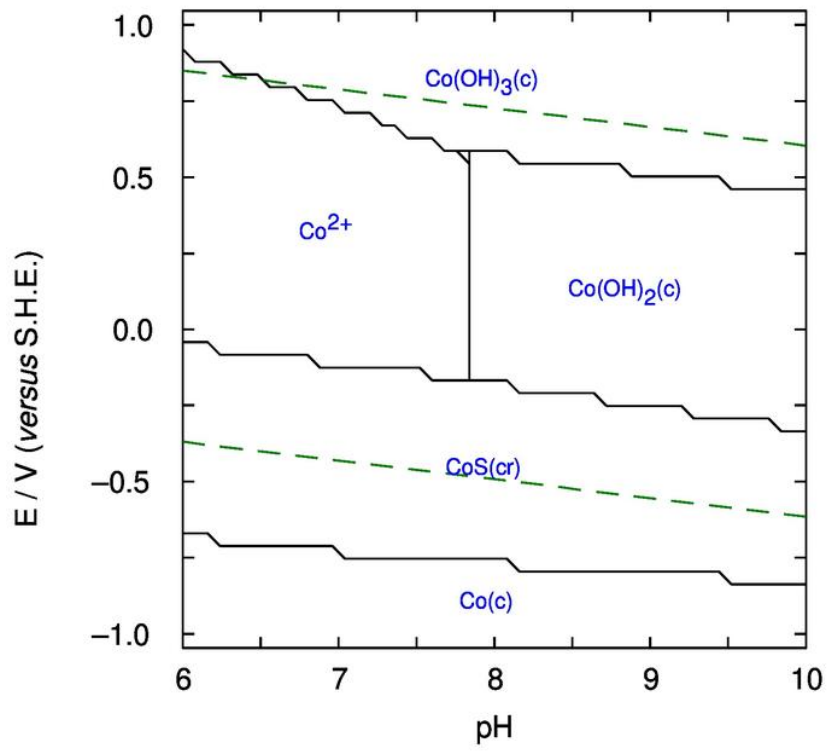

## S

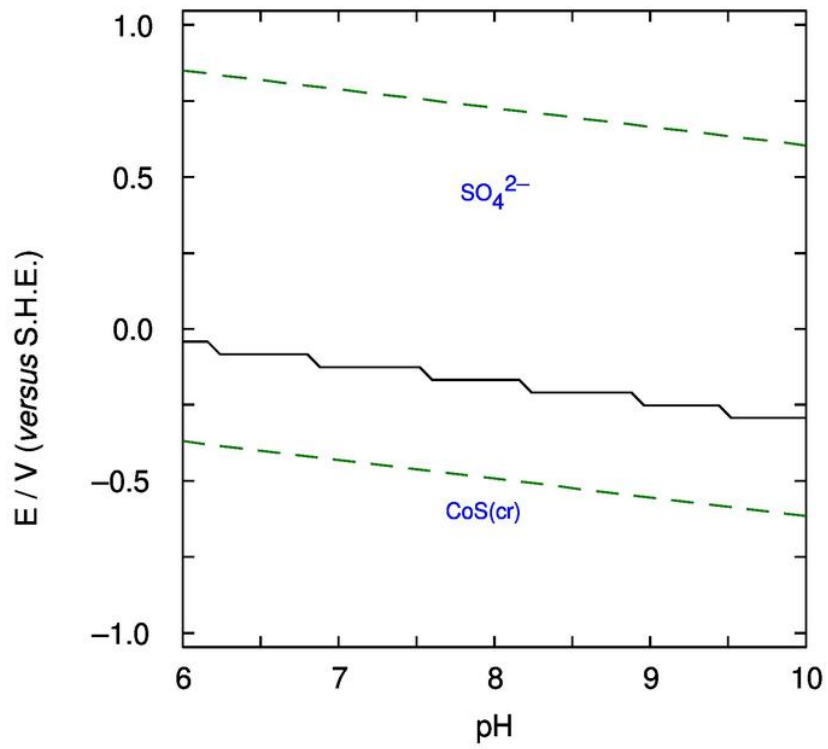

# CoSe

## Co

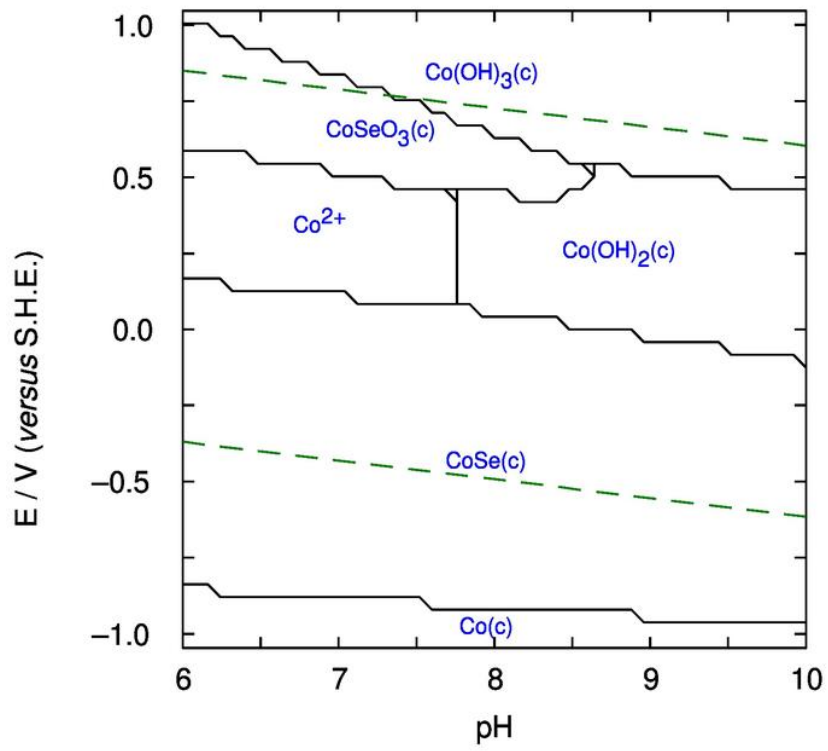

## Se

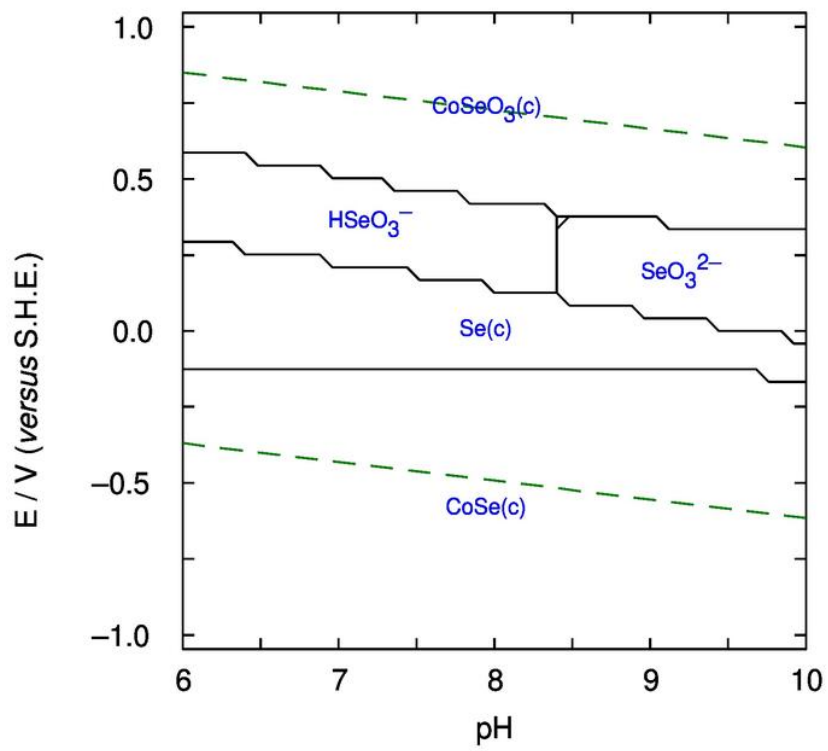

# CoY

## Co



## Y



# CoZr

## Co



## Zr



# CrAg

## Cr

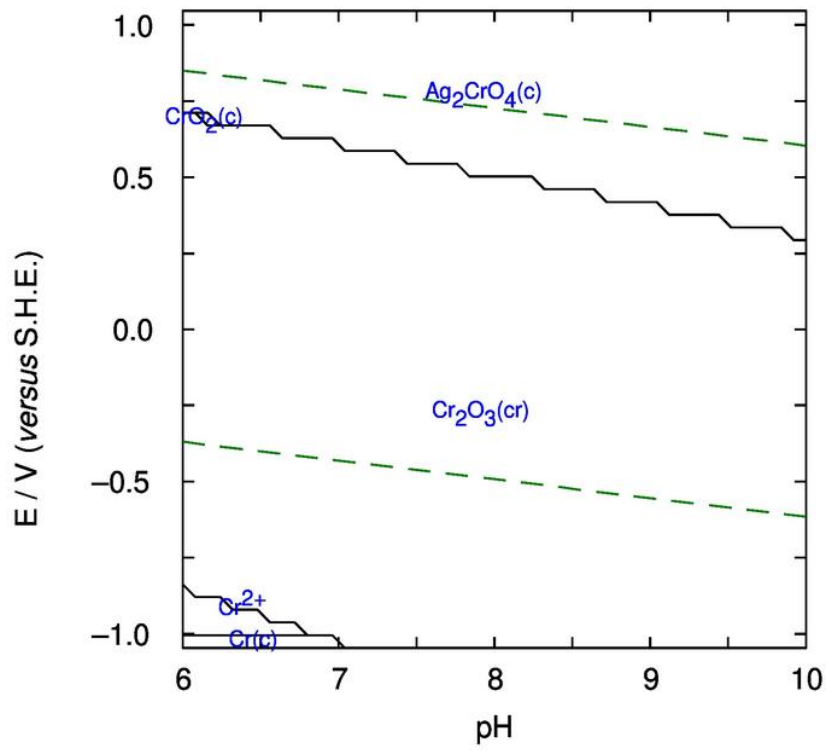

## Ag

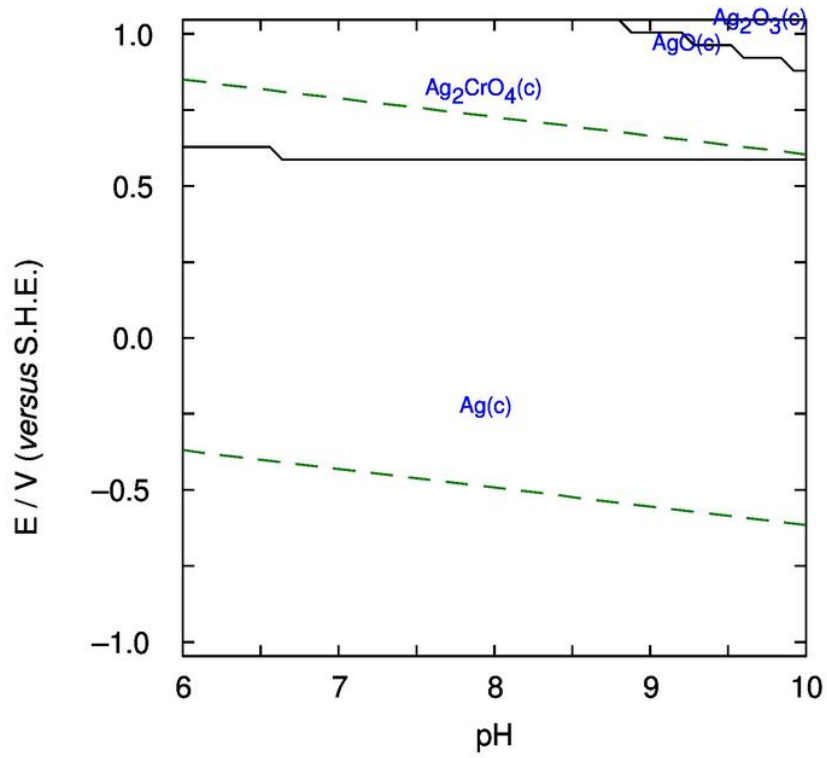

# CrCo

## Cr

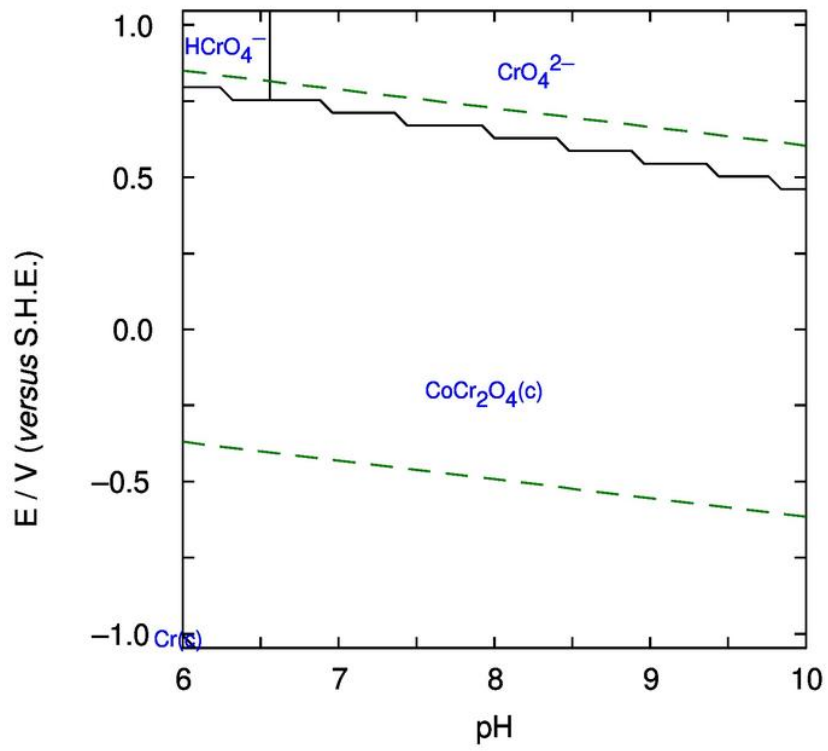

## Co

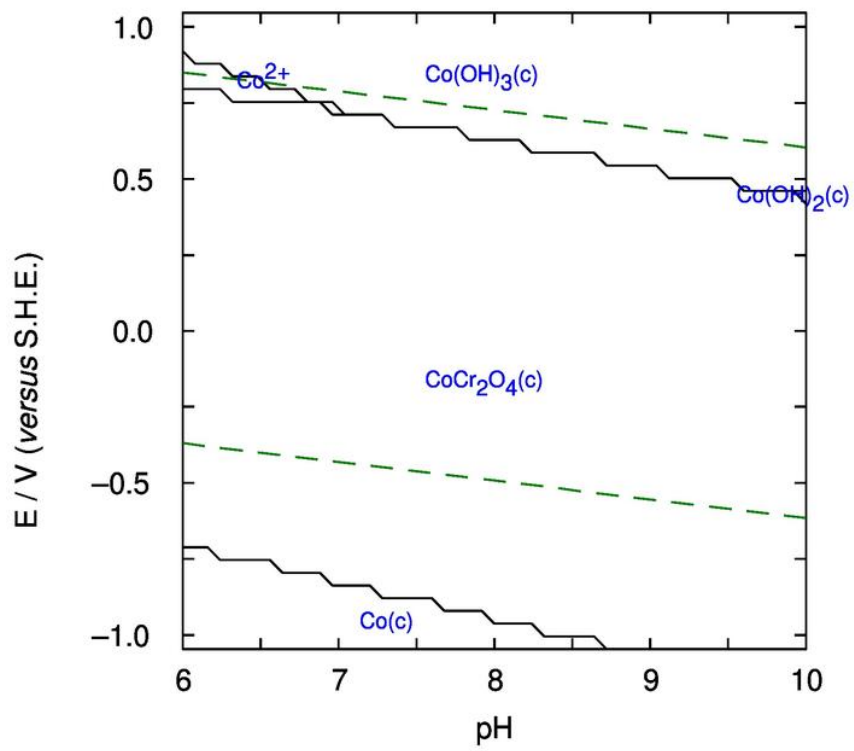

# CrCu

## Cr

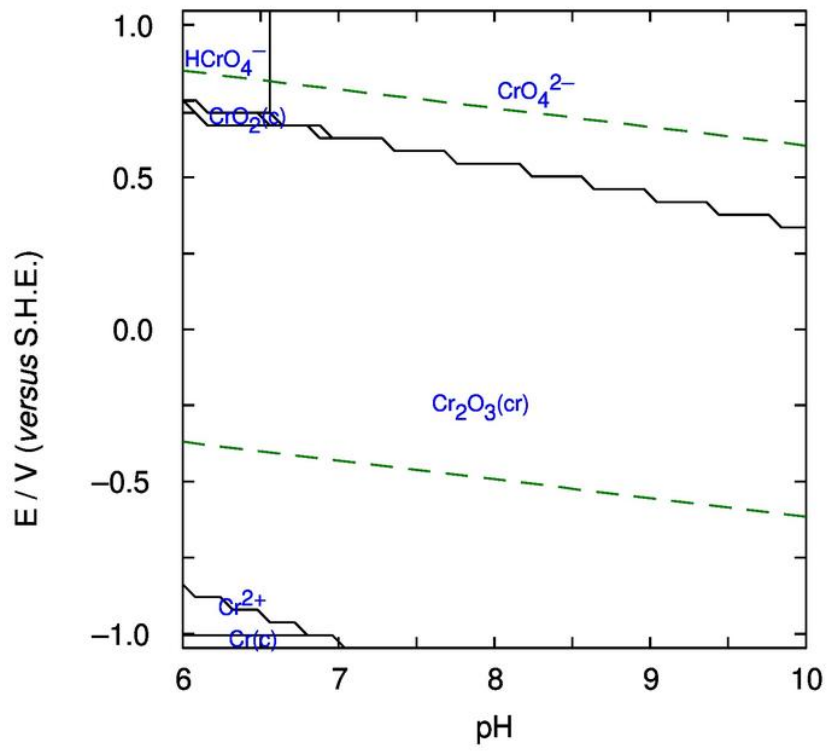

## Cu

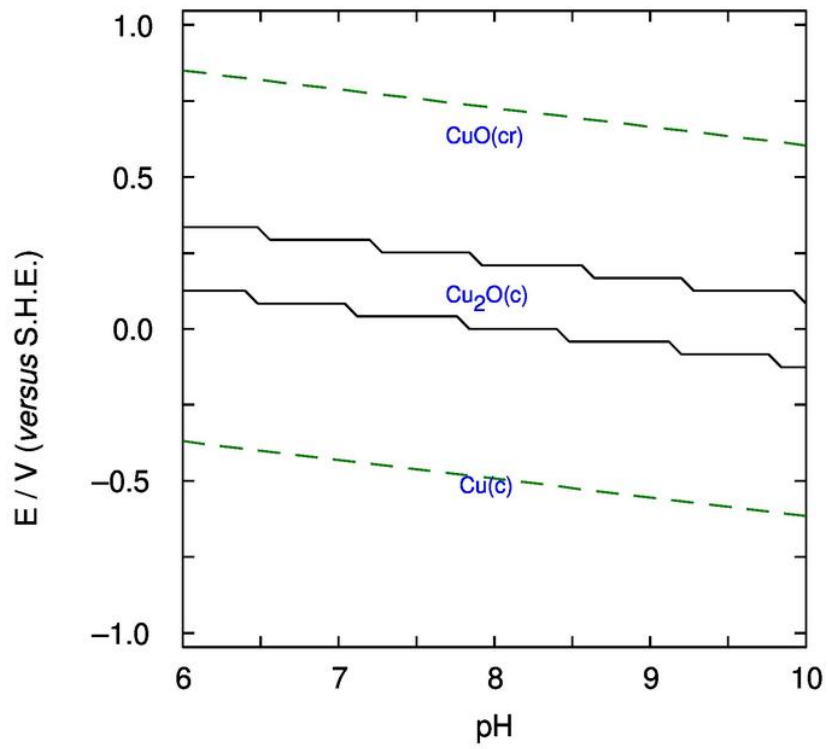



# CrFe

## Cr

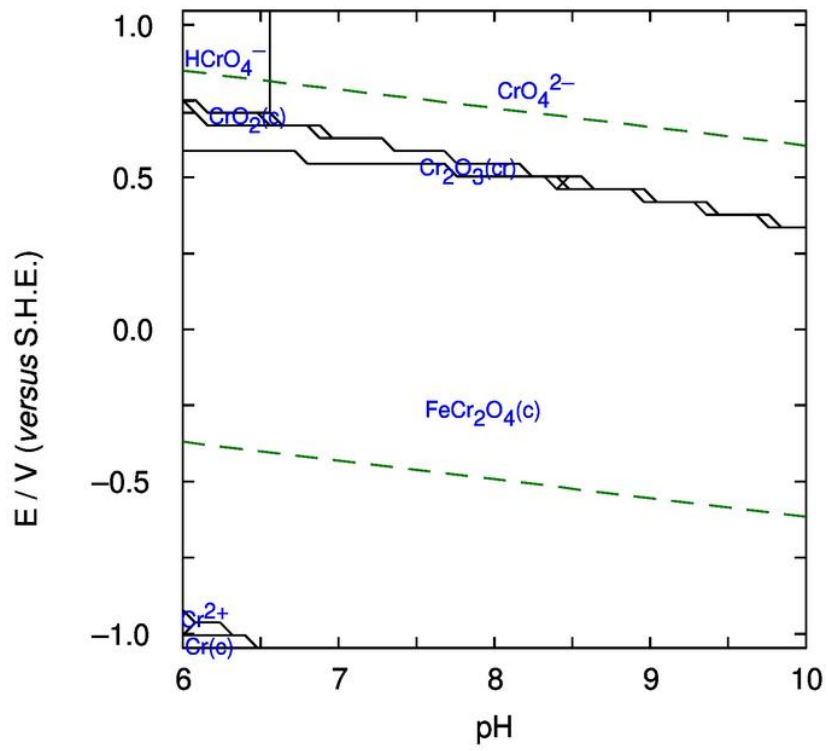

## Fe

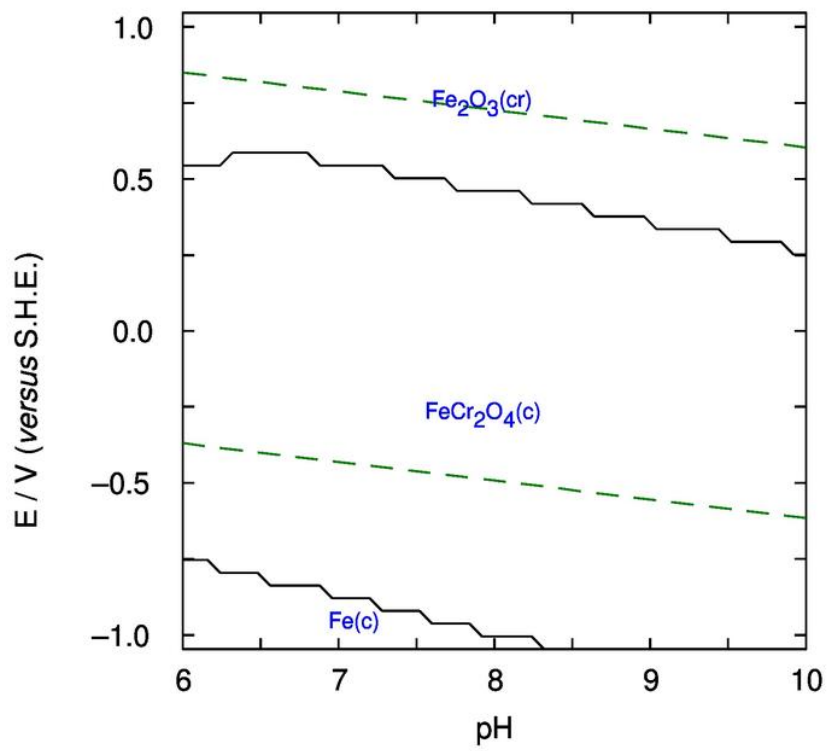

# CrMn

## Cr

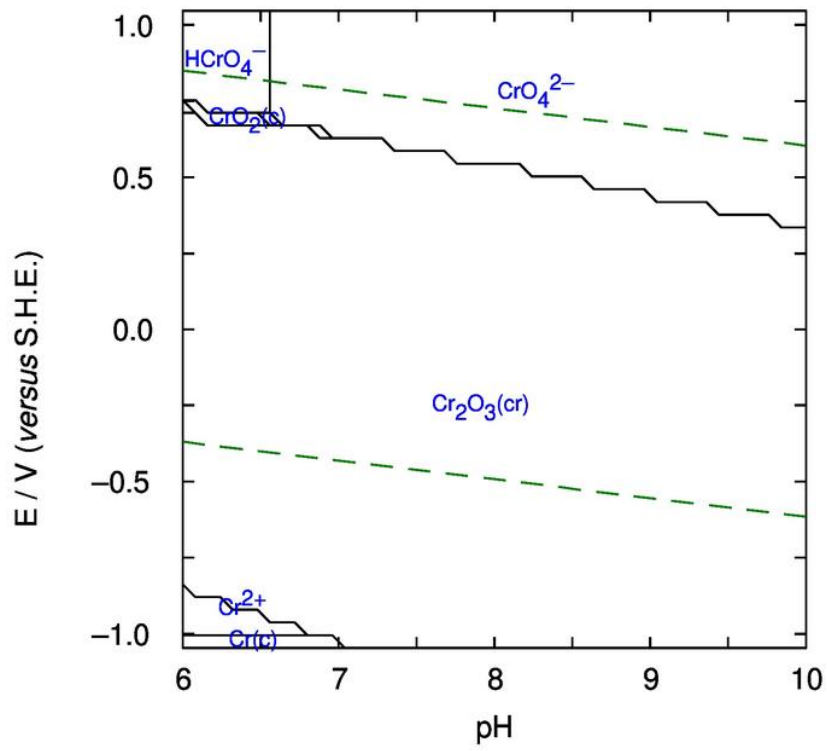

## Mn

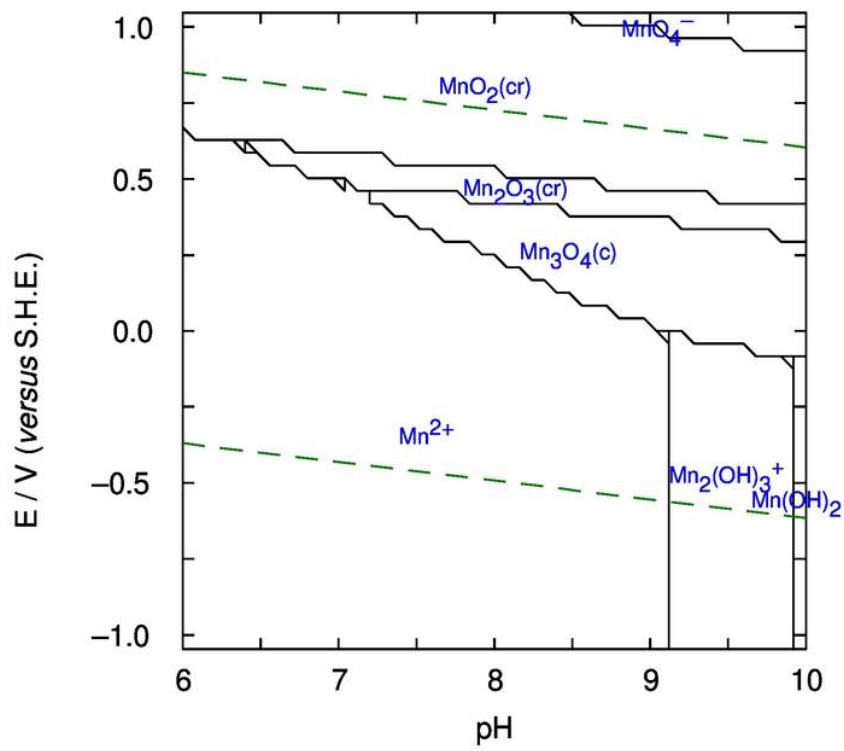

# CrMo

## Cr



## Mo

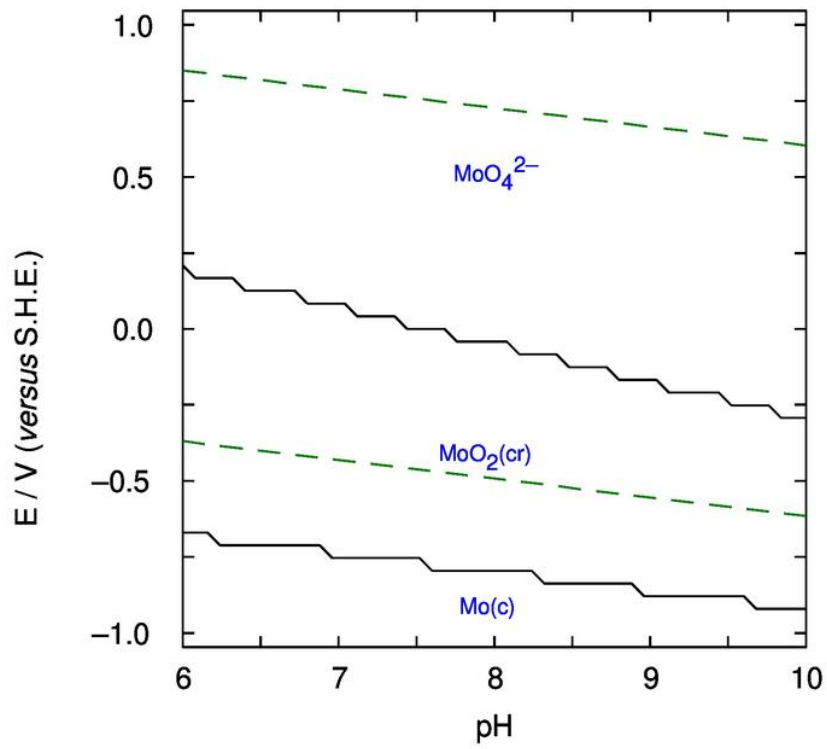

# CrNi

## Cr

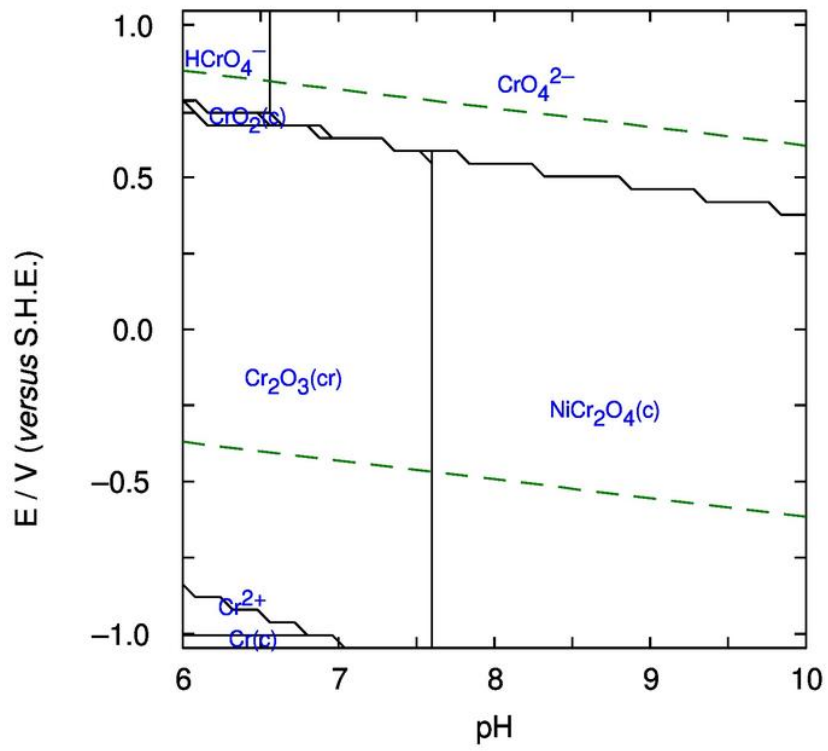

## Ni

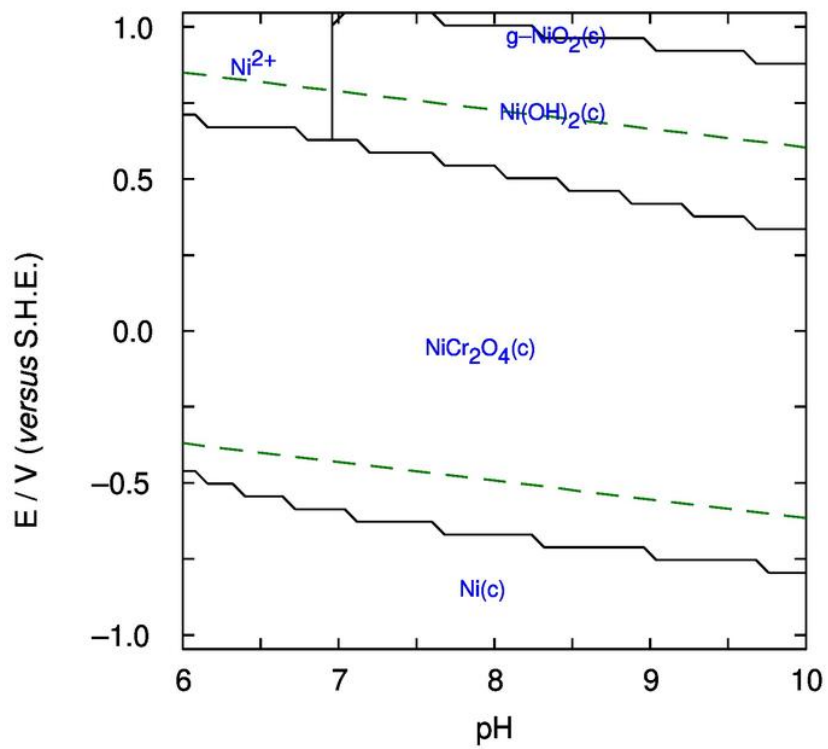

# CrS

## Cr

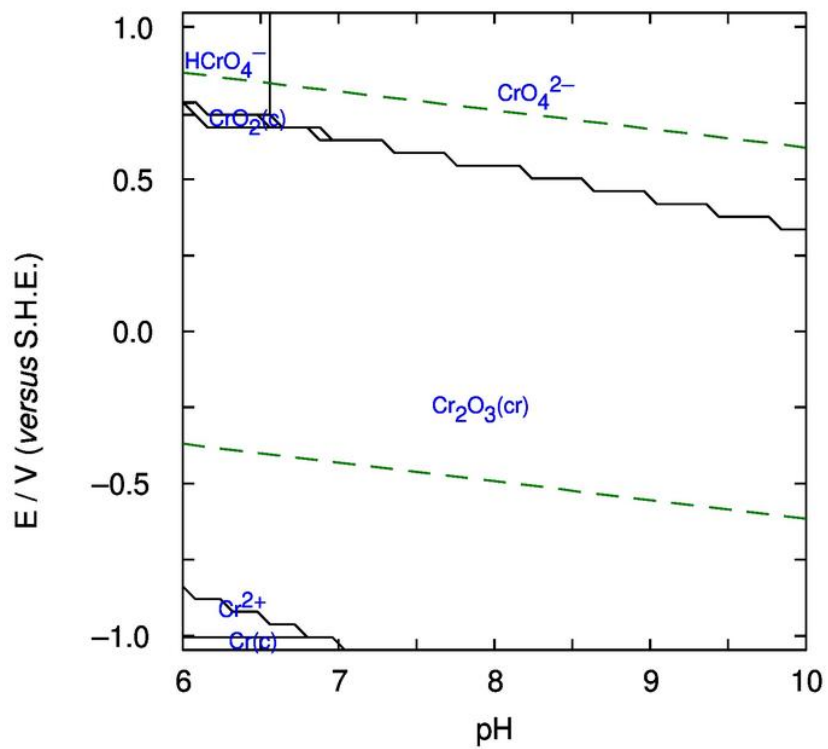

## S

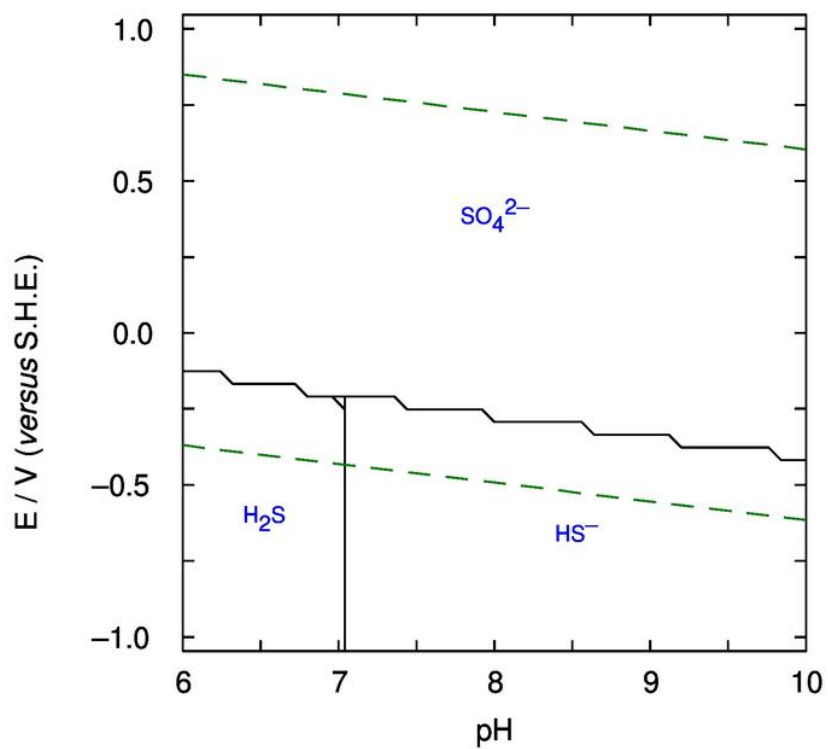

# CrSe

## Cr



## Se



# CrSr

## Cr



## Sr



# CrY

## Cr



## Y





# CrZr

## Cr

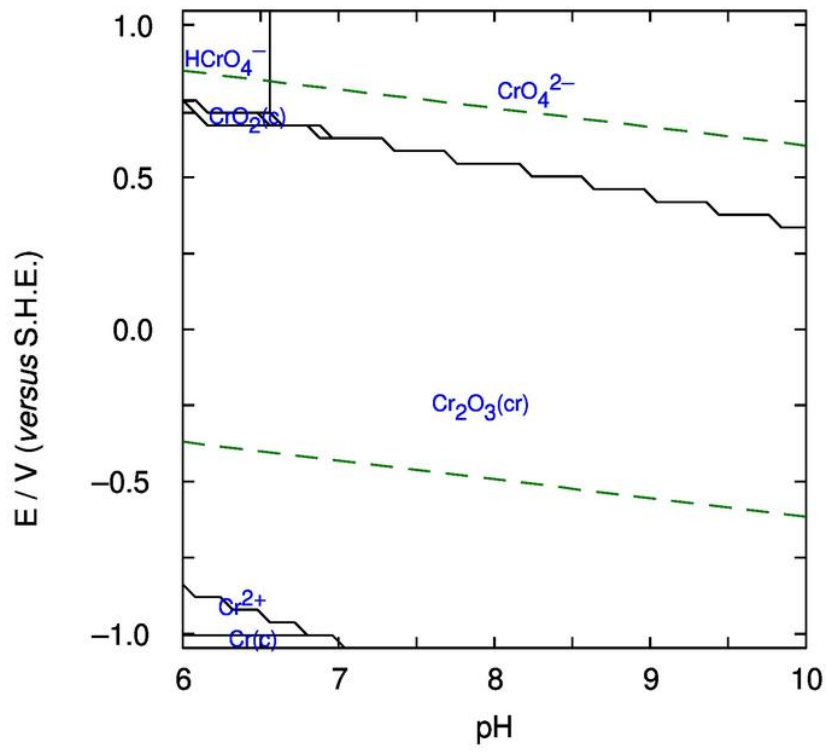

## Zr

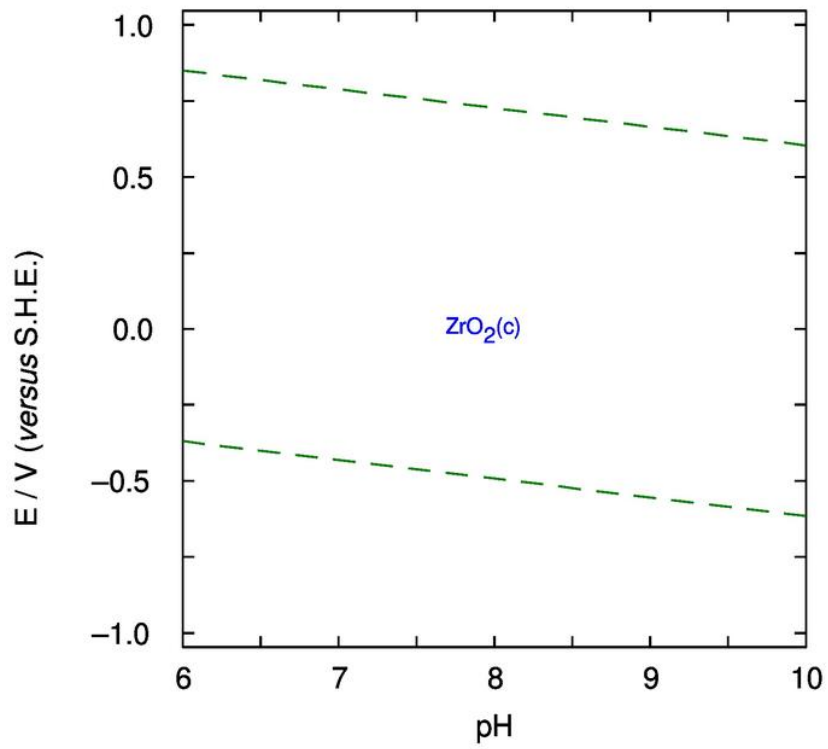

# CuCo

## Cu

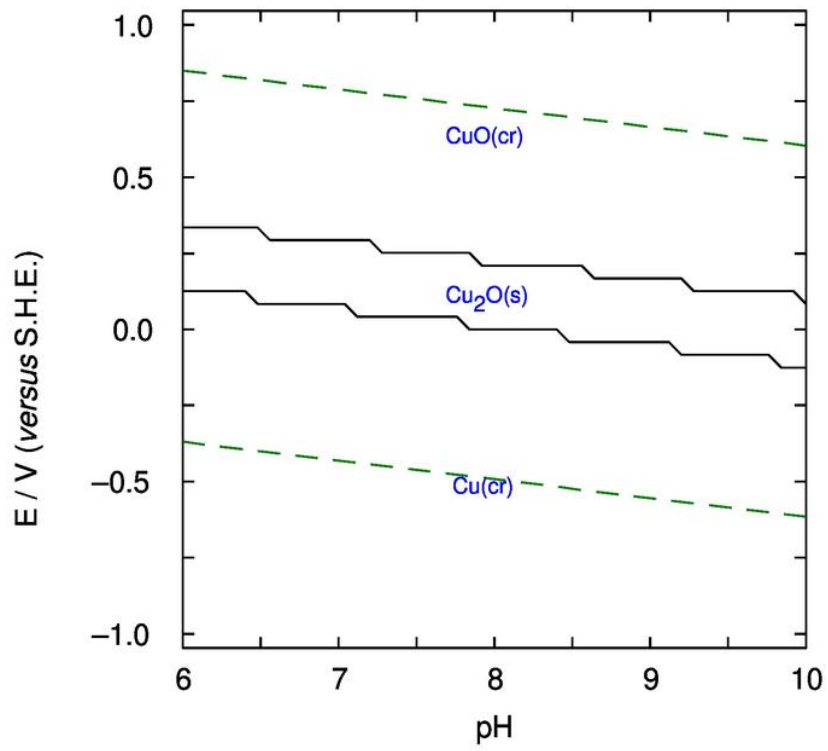

## Co



# CuFe

## Cu

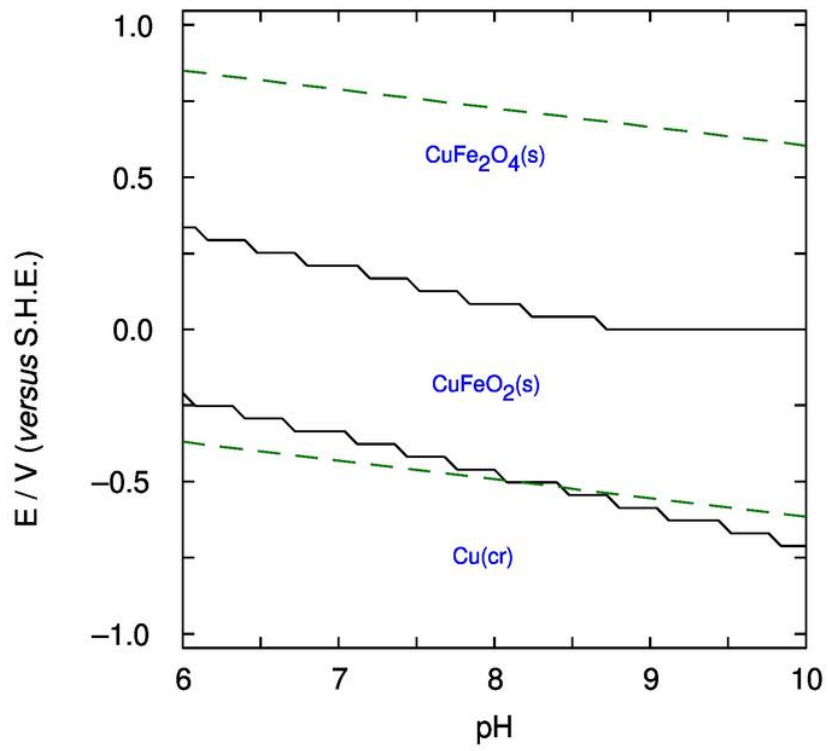

## Fe

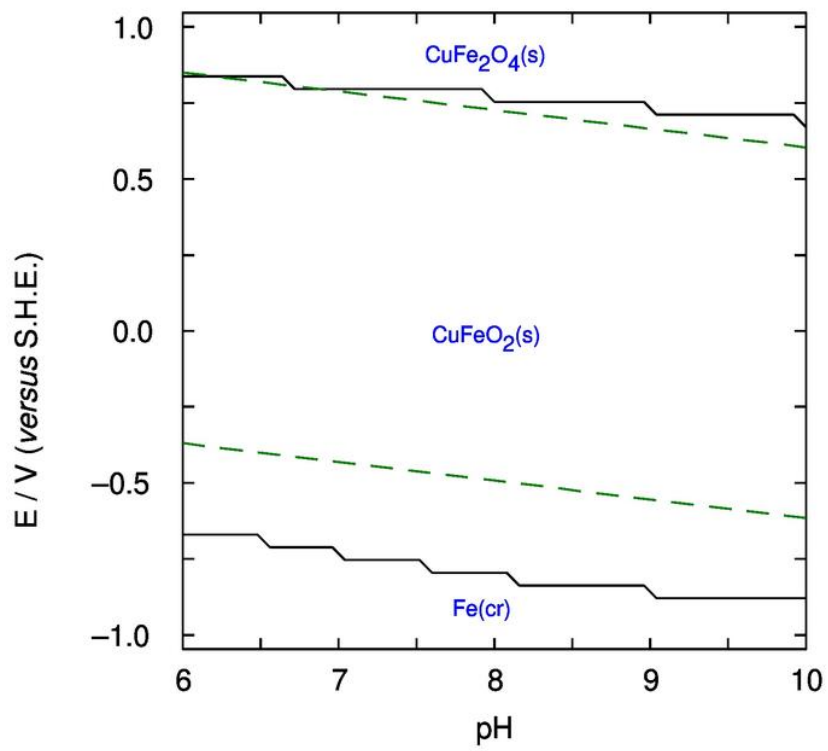

# CuRb

## Cu



## Rb



# CuS

## Cu

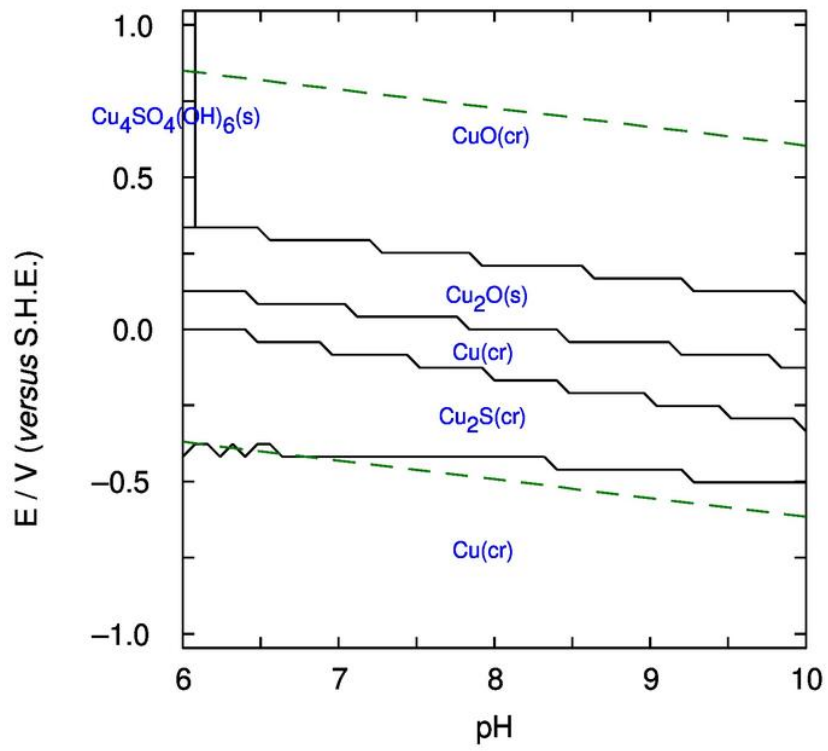

## S

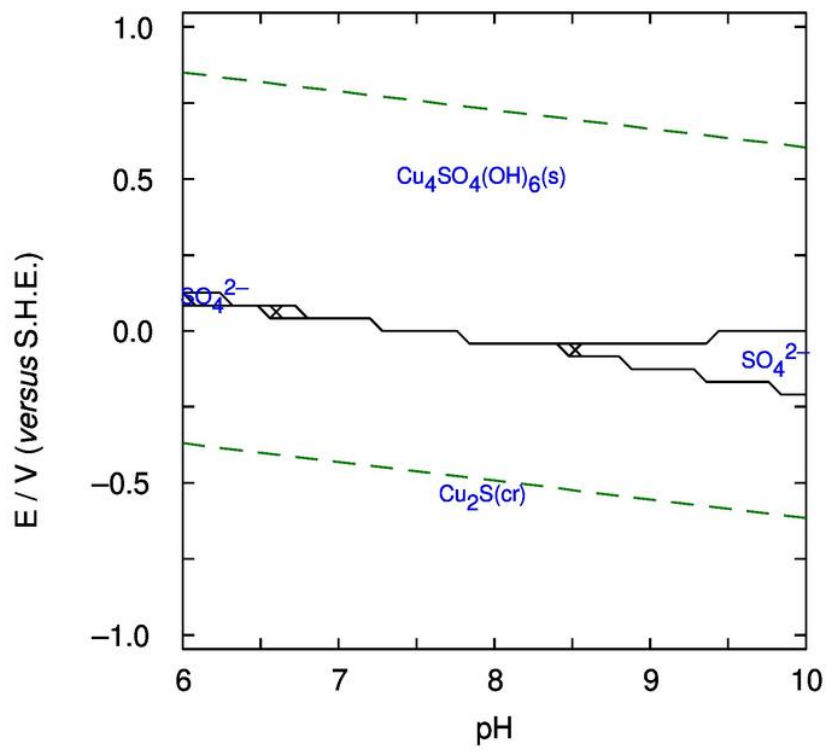

# CuSe

## Cu

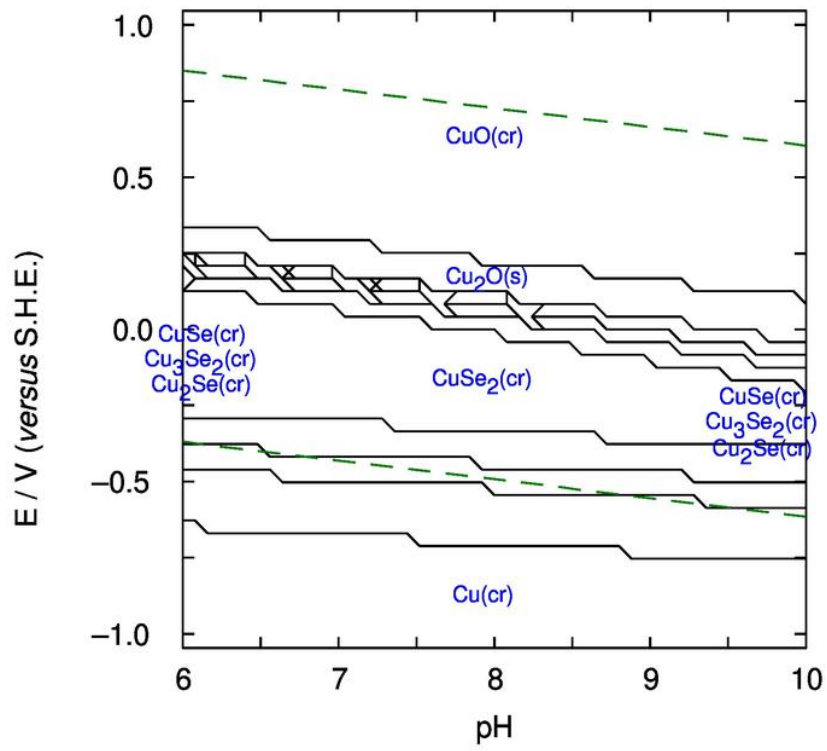

## Se

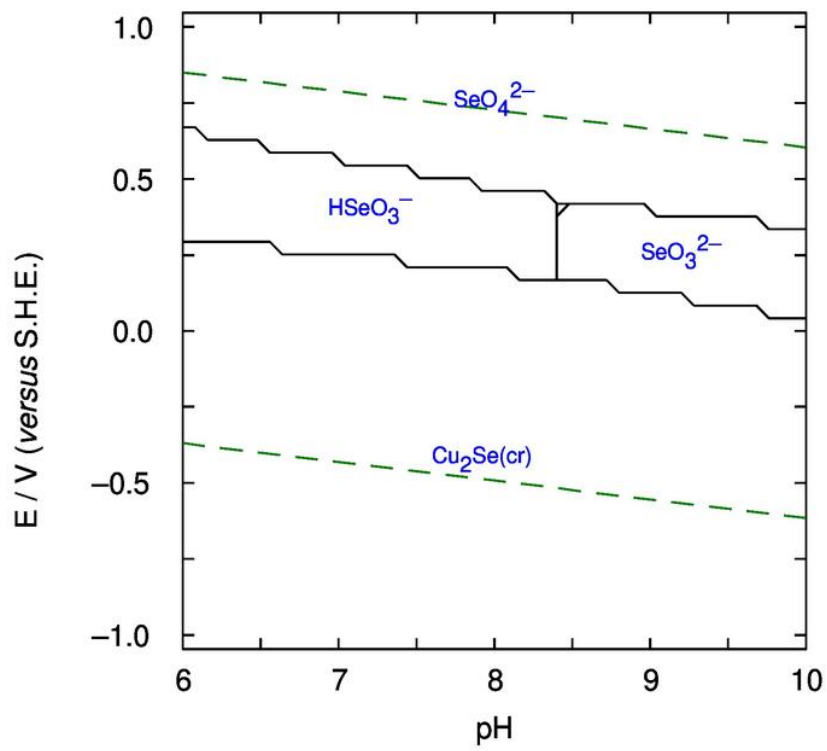

# CuY

## Cu



## Y



# CuZr

## Cu

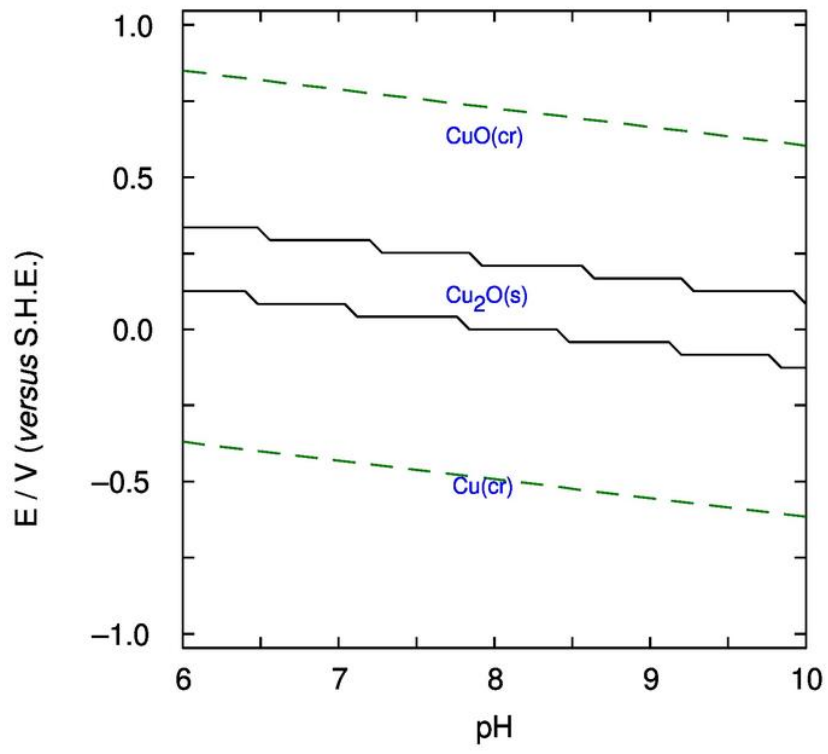

## Zr





# EuAg

## Eu

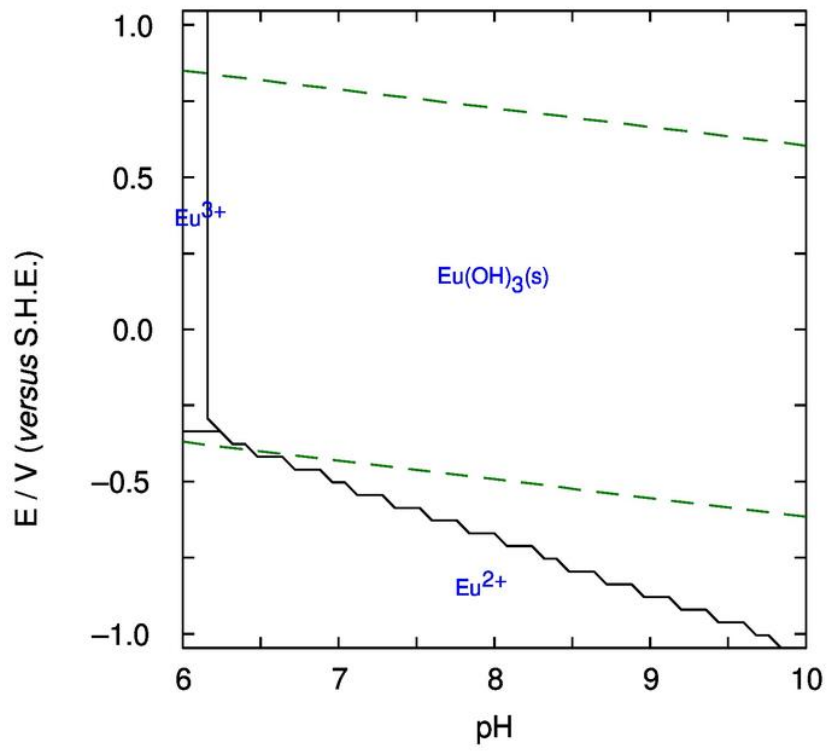

## Ag



# EuAl

## Eu



## Al



# EuBa

## Eu



## Ba

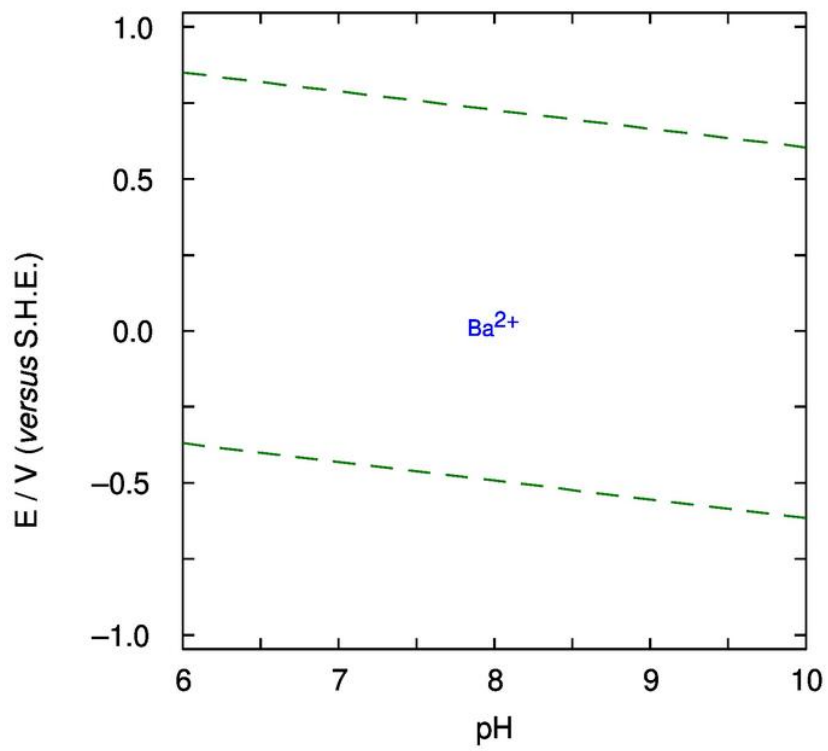

# EuCd

## Eu



## Cd



# EuCe

## Eu

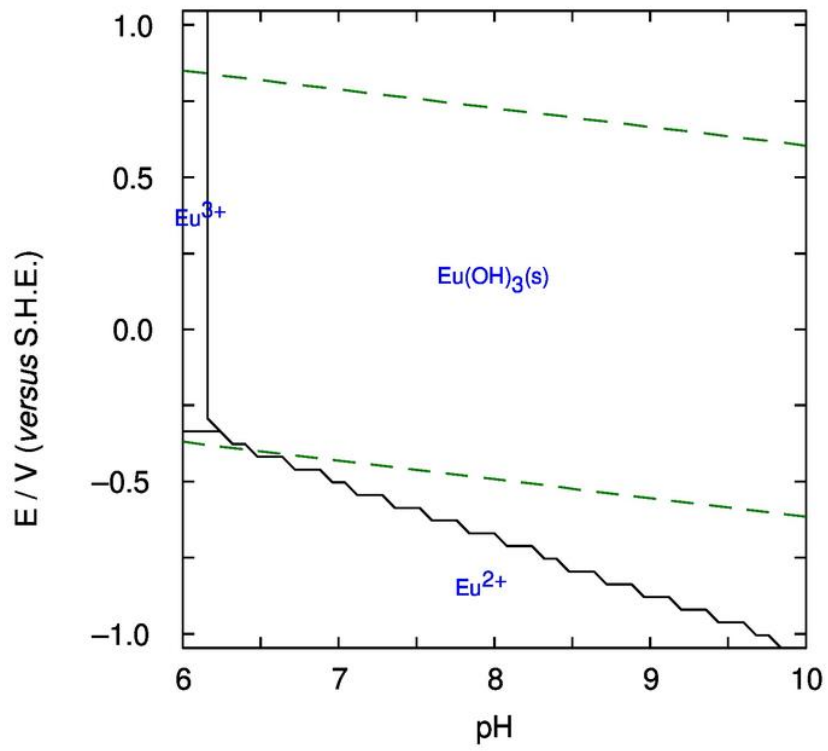

## Ce



# EuCo

## Eu



## Co



# EuCr

## Eu



## Cr



# EuCu

## Eu

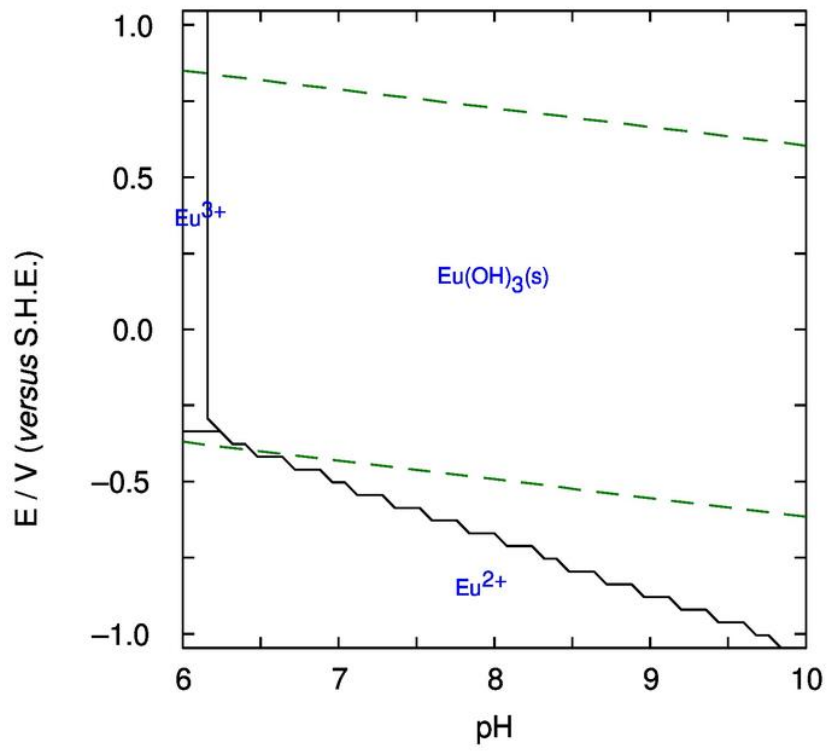

## Cu

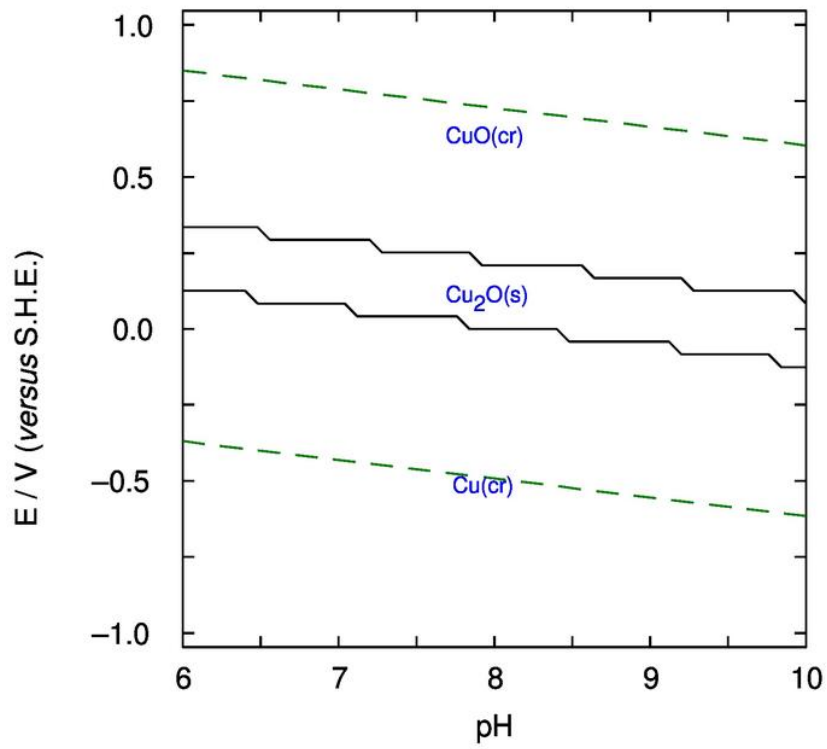



# EuFe

## Eu



## Fe



# EuIn

## Eu



## In



# EuLa

## Eu



## La



# EuMn

## Eu



## Mn



# EuMo

## Eu



## Mo



# EuNd

## Eu



## Nd

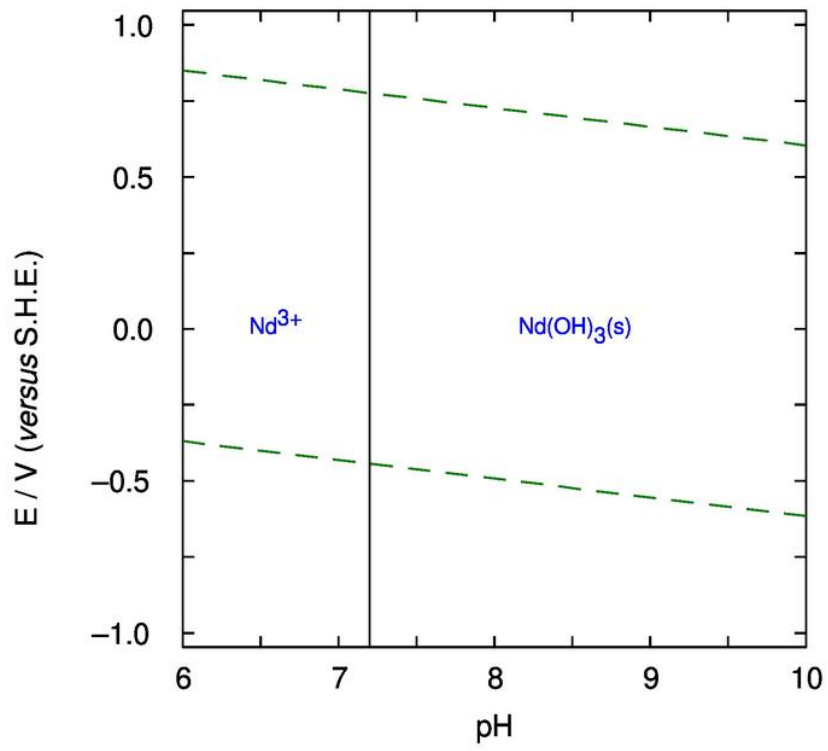

# EuNi

## Eu



## Ni



# EuPr

## Eu



## Pr

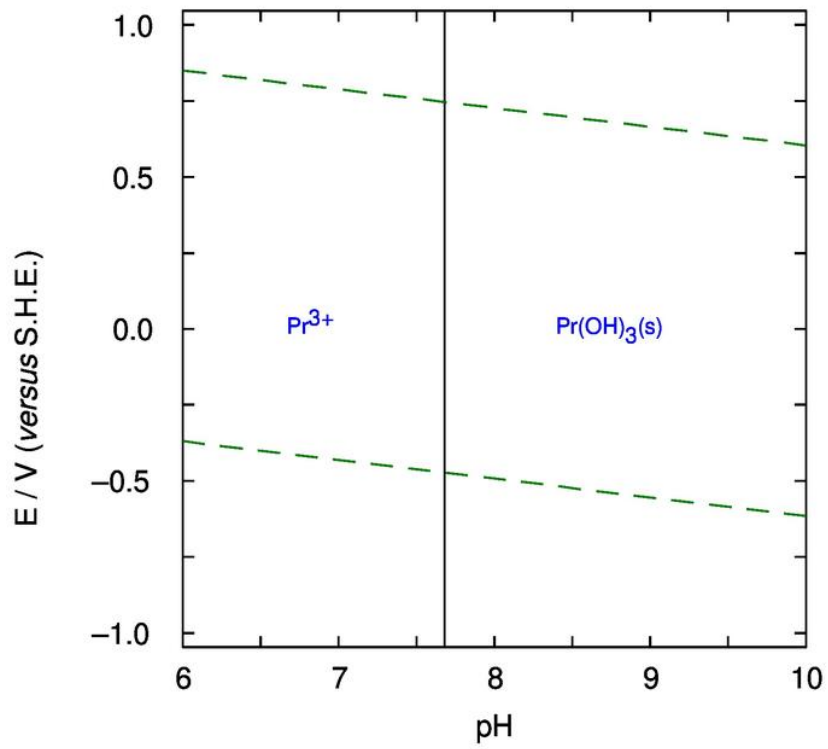



# EuRb

## Eu



## Rb



# EuS

## Eu

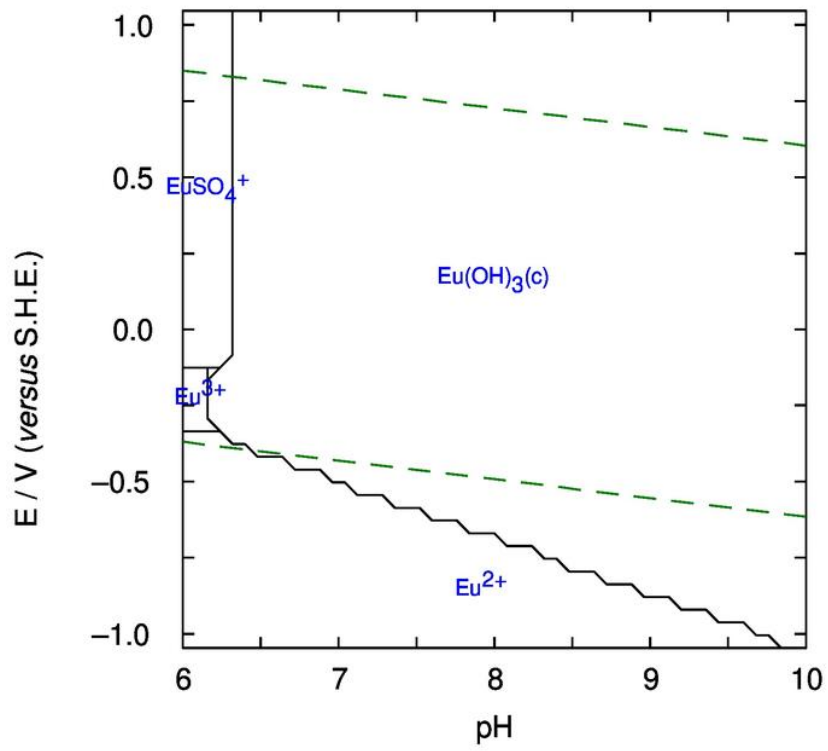

## S

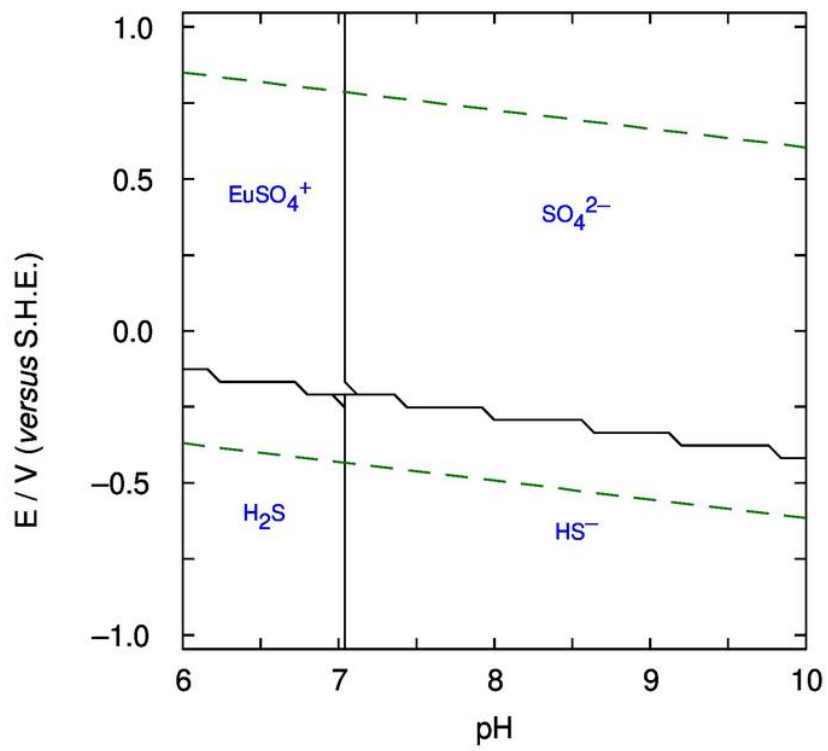

# EuSe

## Eu

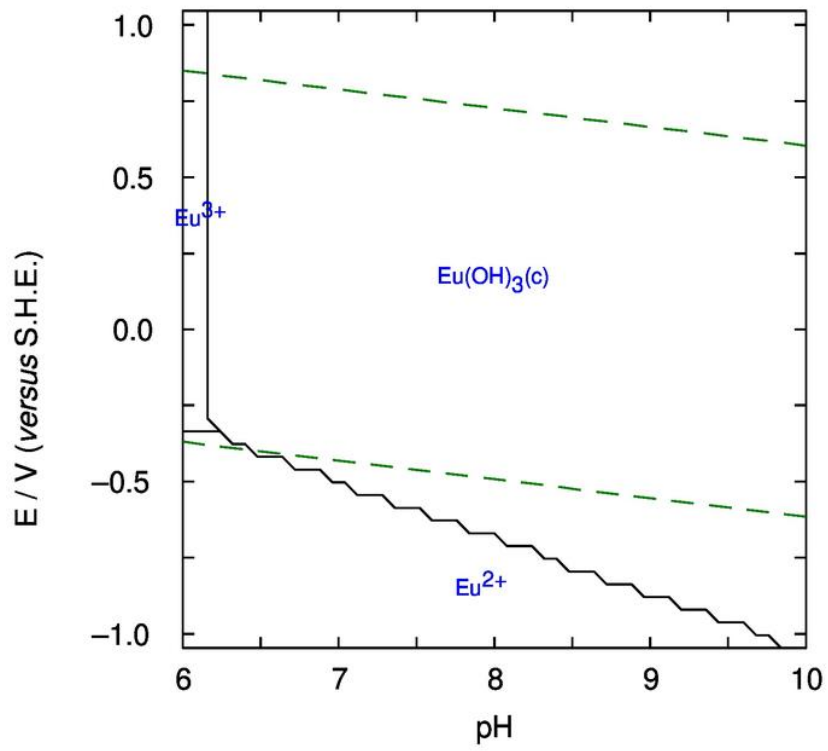

## Se

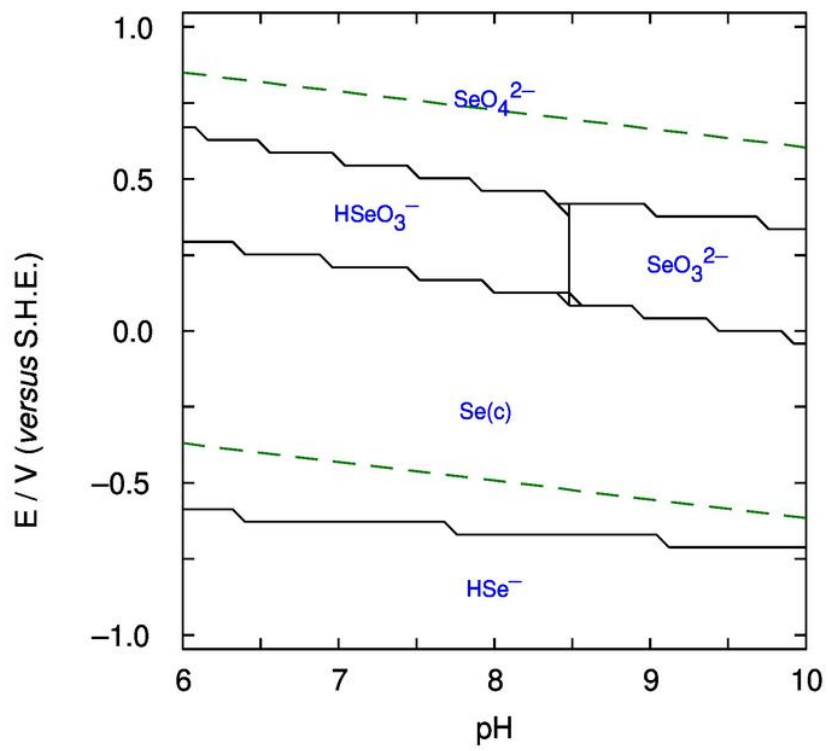

# EuSm

## Eu



## Sm



# EuSn

## Eu



## Sn

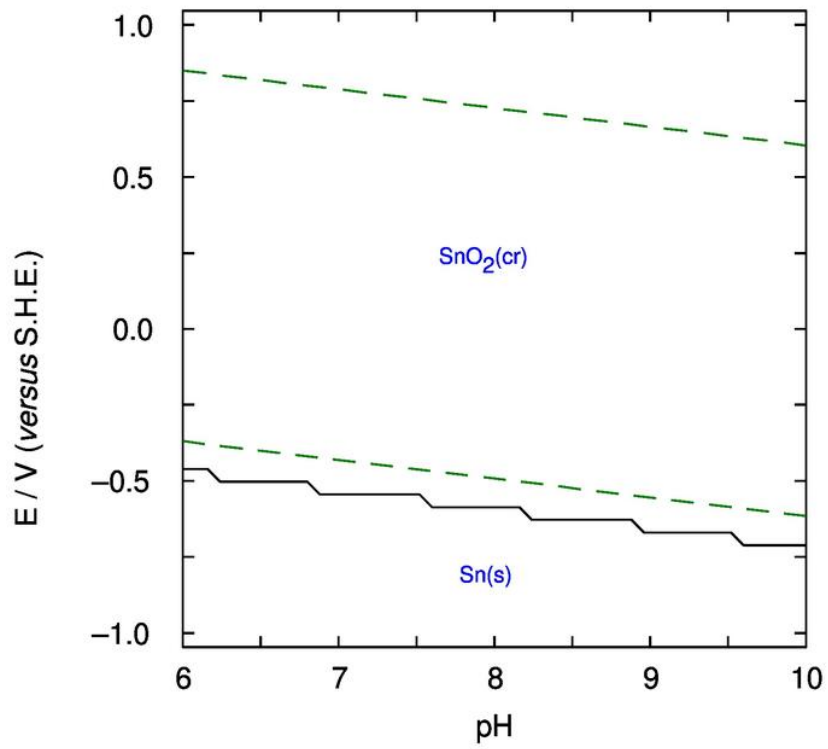

# EuSr

## Eu



## Sr



# EuTe

## Eu



## Te



# EuV

## Eu



## V





# EuY

## Eu



## Y



# EuZn

## Eu



## Zn



# EuZr

## Eu



## Zr



# FeRb

## Fe

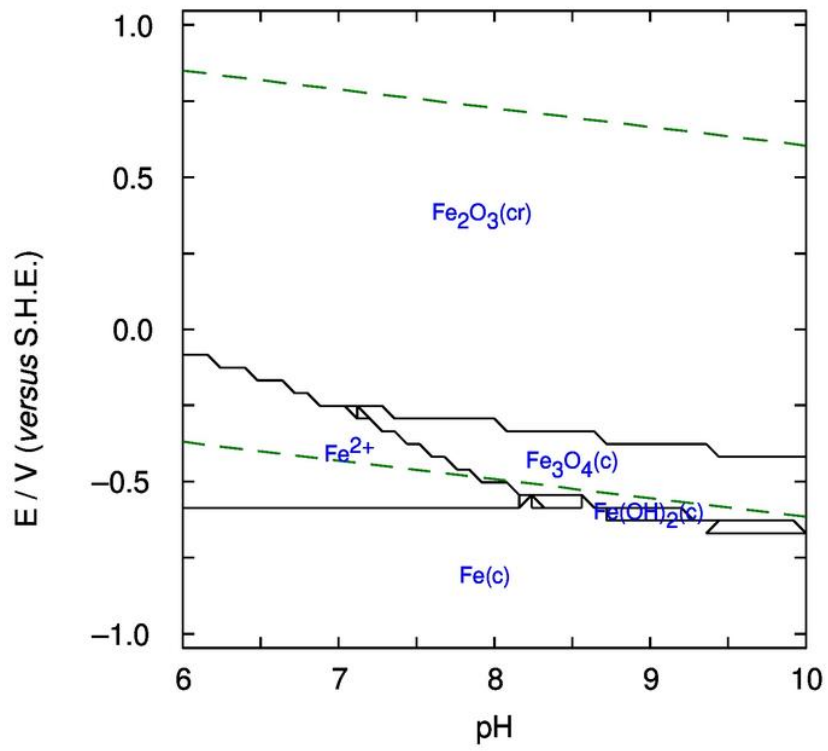

## Rb



# FeS

## Fe

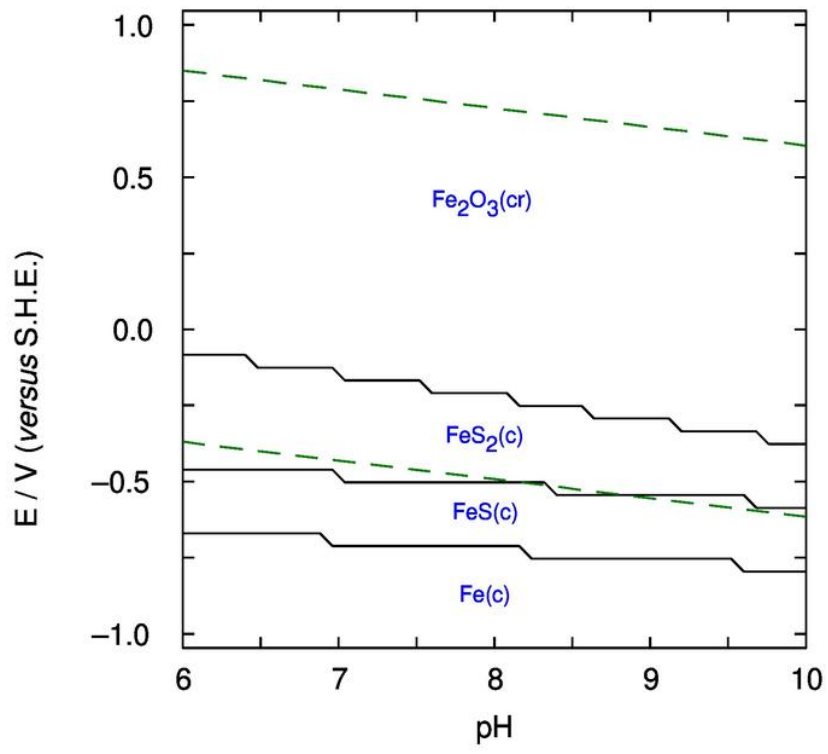

## S

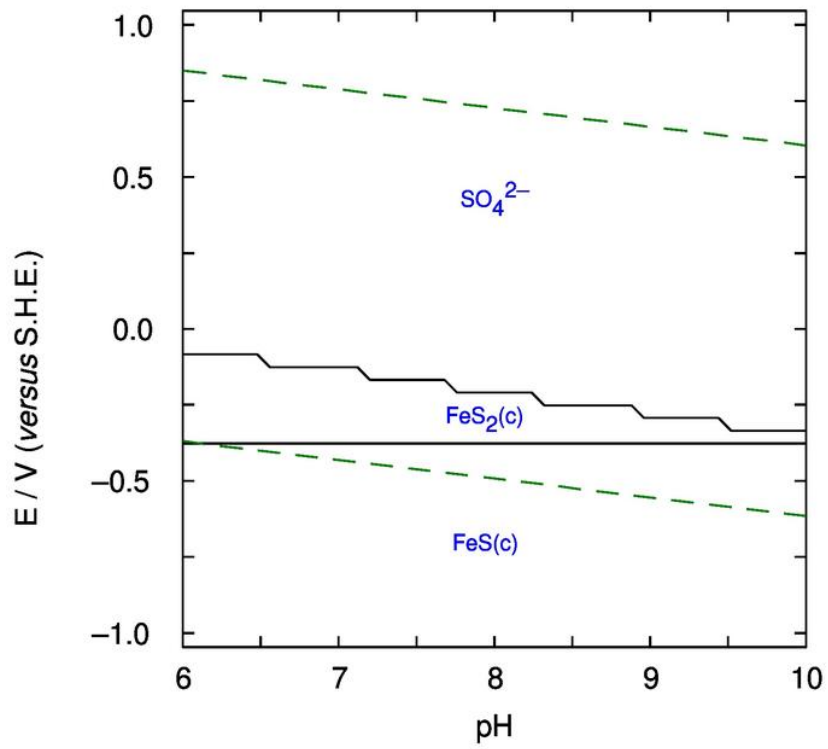

# FeSe

## Fe

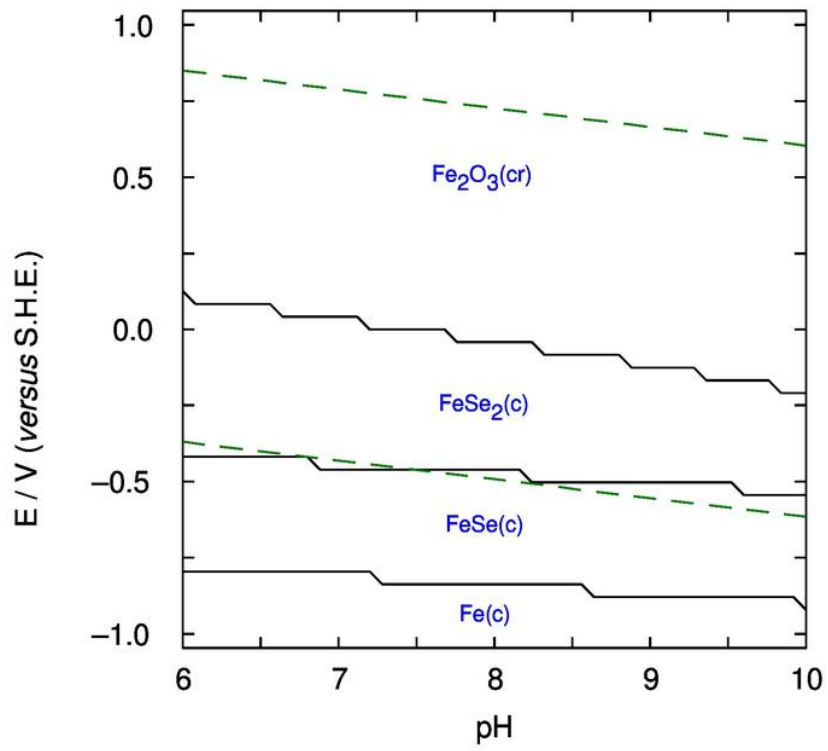

## Se

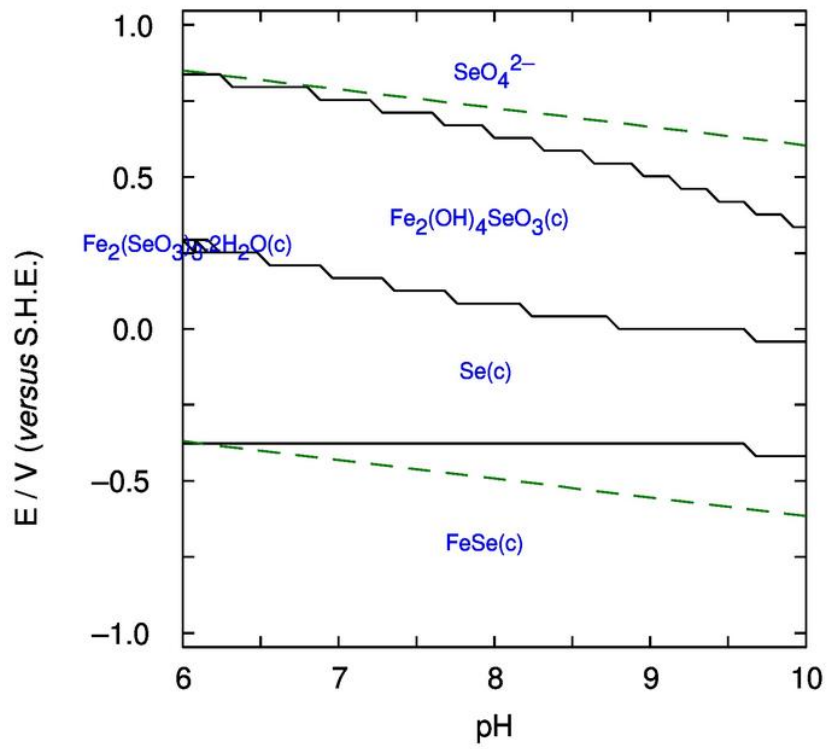

# FeY

## Fe



## Y



# FeZr

## Fe



## Zr





# GdAg

## Gd

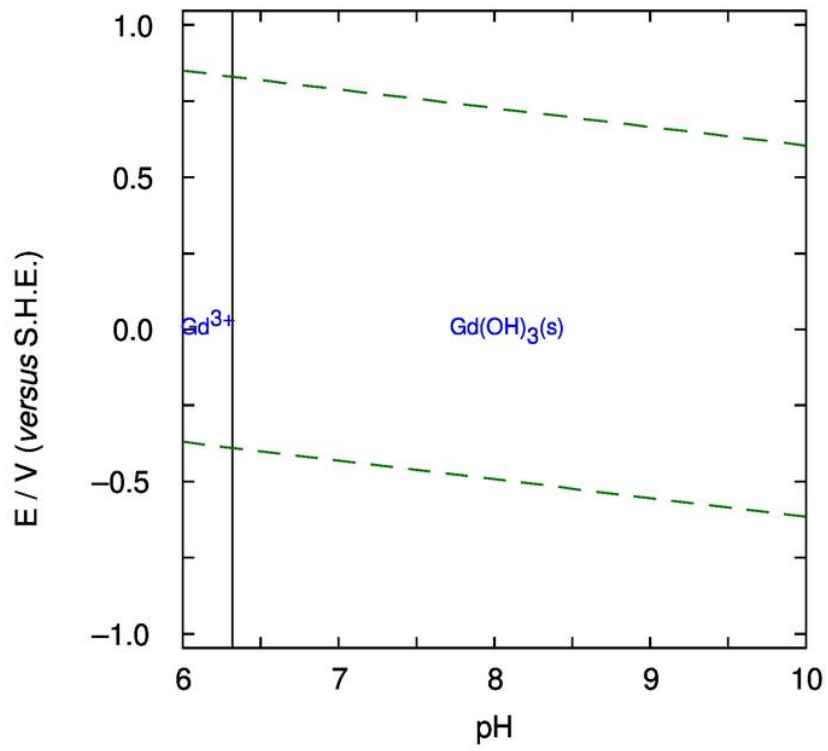

## Ag



# GdAl

## Gd

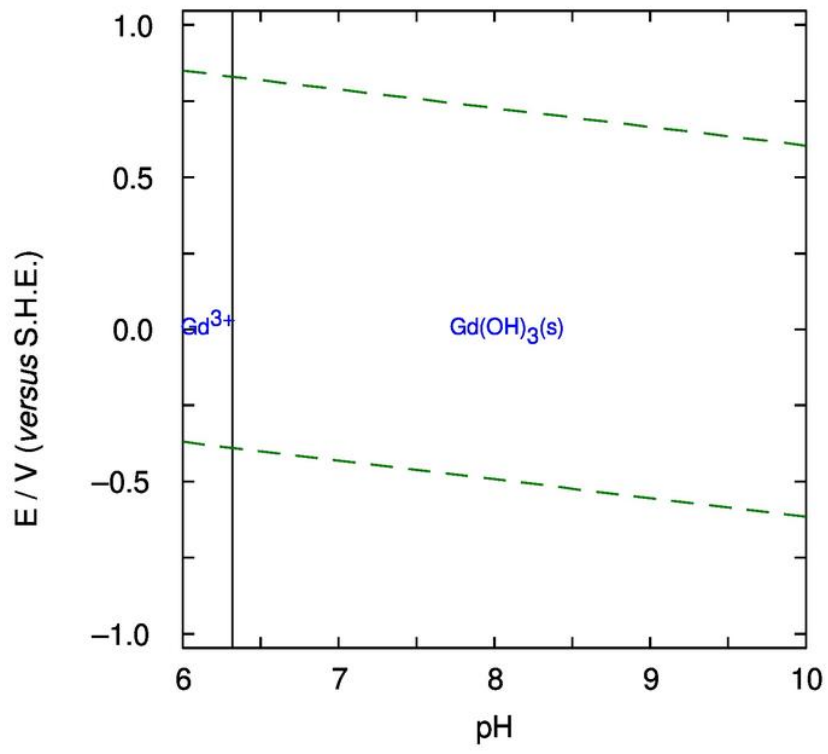

## Al



# GdBa

## Gd



## Ba



# GdCd

## Gd



## Cd



# GdCe

## Gd



## Ce



# GdCo

## Gd



## Co



# GdCr

## Gd



## Cr



# GdCu

## Gd



## Cu





# GdEu

## Gd



## Eu



# GdFe

## Gd



## Fe



# GdIn

## Gd



## In



# GdLa

## Gd



## La



# GdMn

## Gd

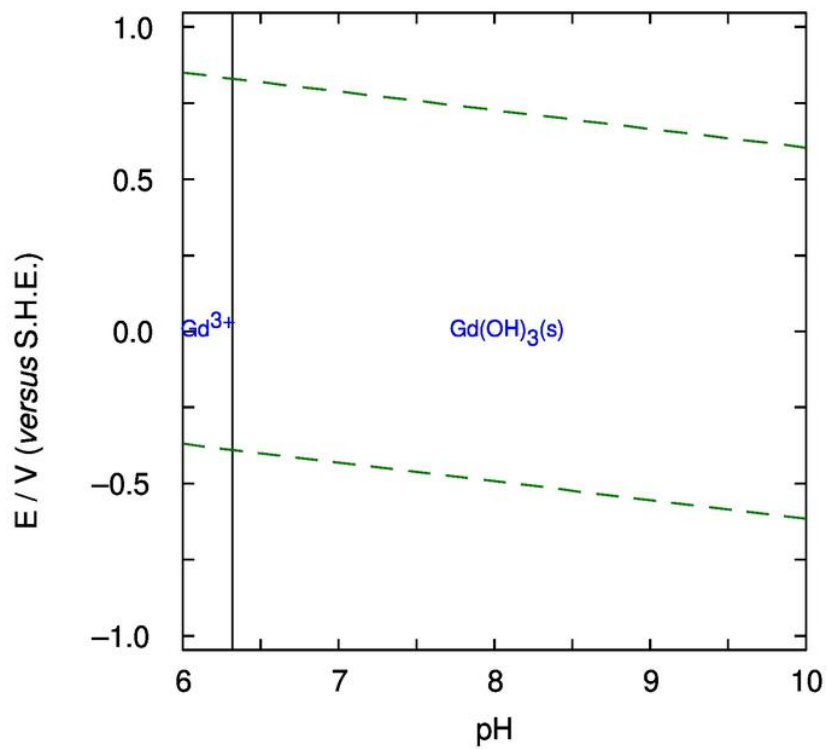

## Mn



# GdMo

## Gd



## Mo

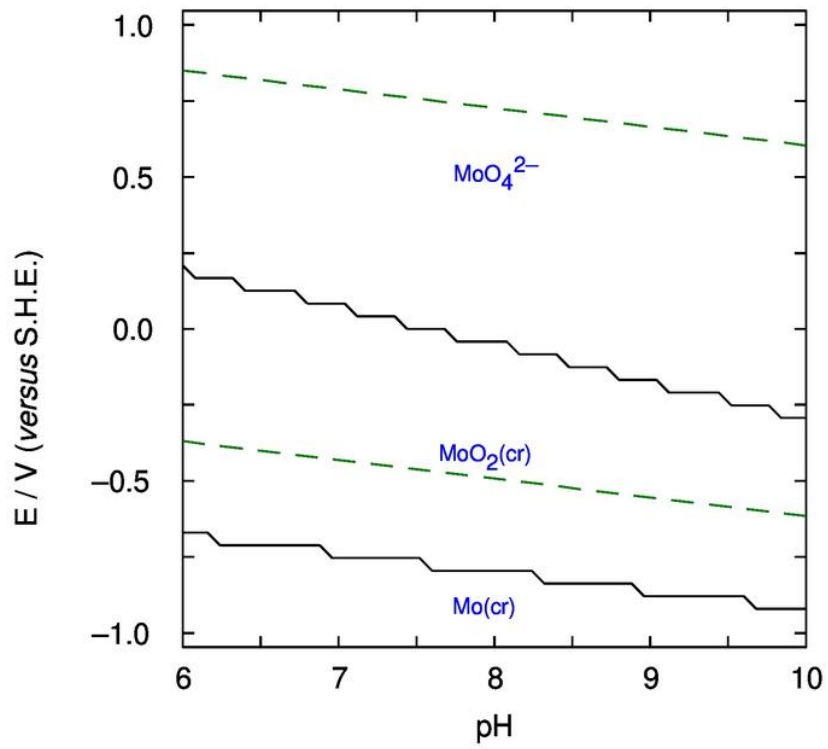

# GdNd

## Gd



## Nd



# GdNi

## Gd



## Ni





# GdPr

## Gd



## Pr

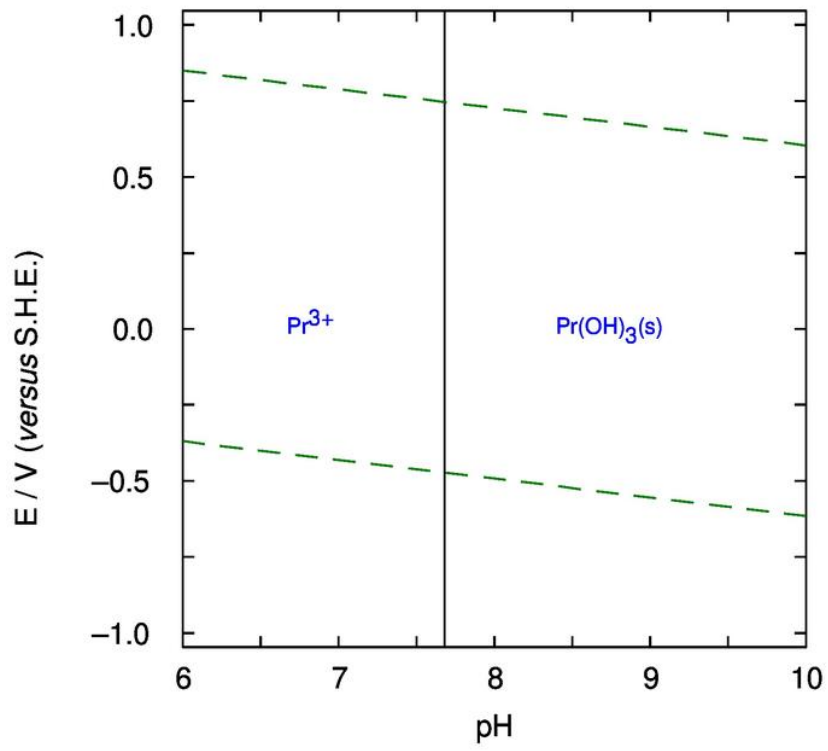

# GdRb

## Gd



## Rb



# GdS

## Gd

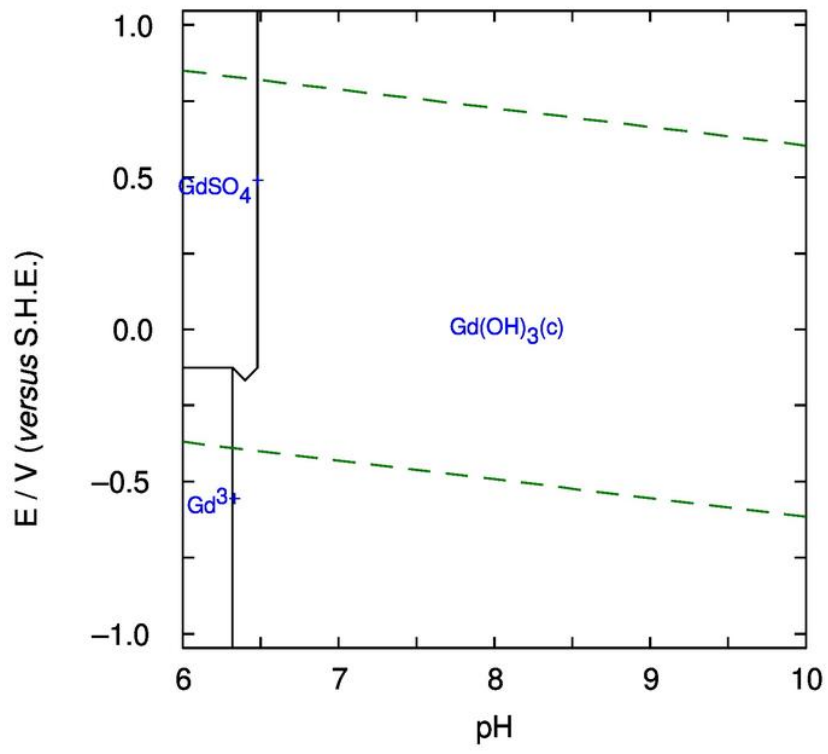

## S

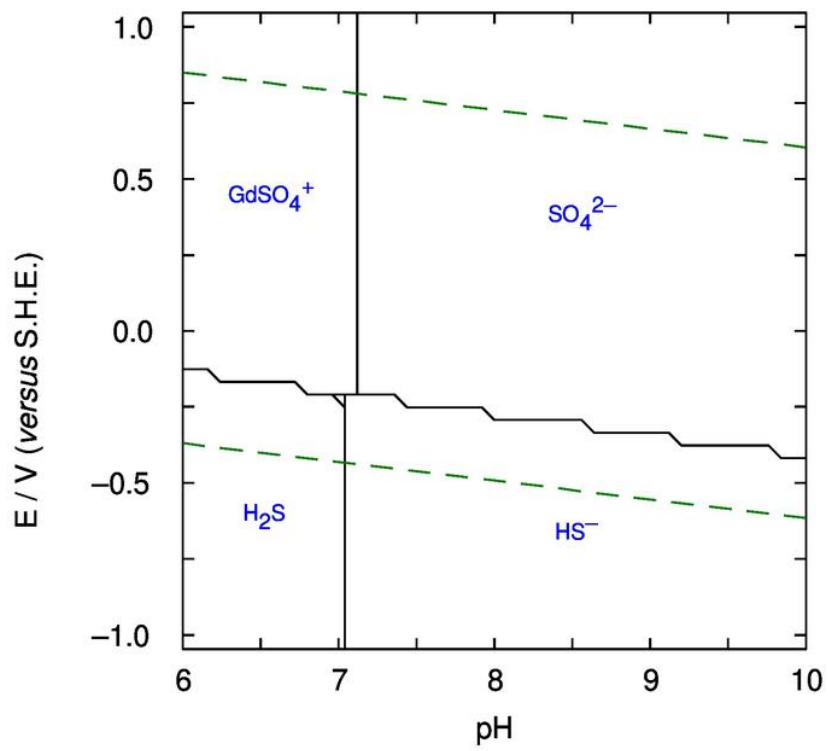

# GdSe

## Gd



## Se



# GdSm

## Gd



## Sm



# GdSn

## Gd



## Sn



# GdSr

## Gd



## Sr



# GdTe

## Gd



## Te





# GdV

## Gd



## V



# GdY

## Gd



## Y



# GdZn

## Gd



## Zn



# GdZr

## Gd



## Zr



# HgAg

## Hg

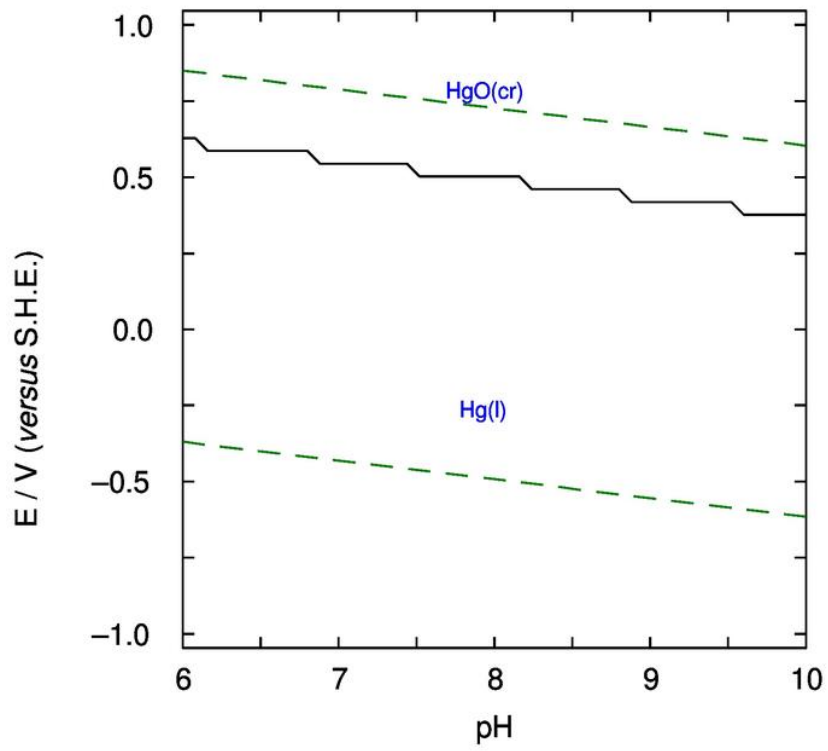

## Ag



# HgAl

## Hg

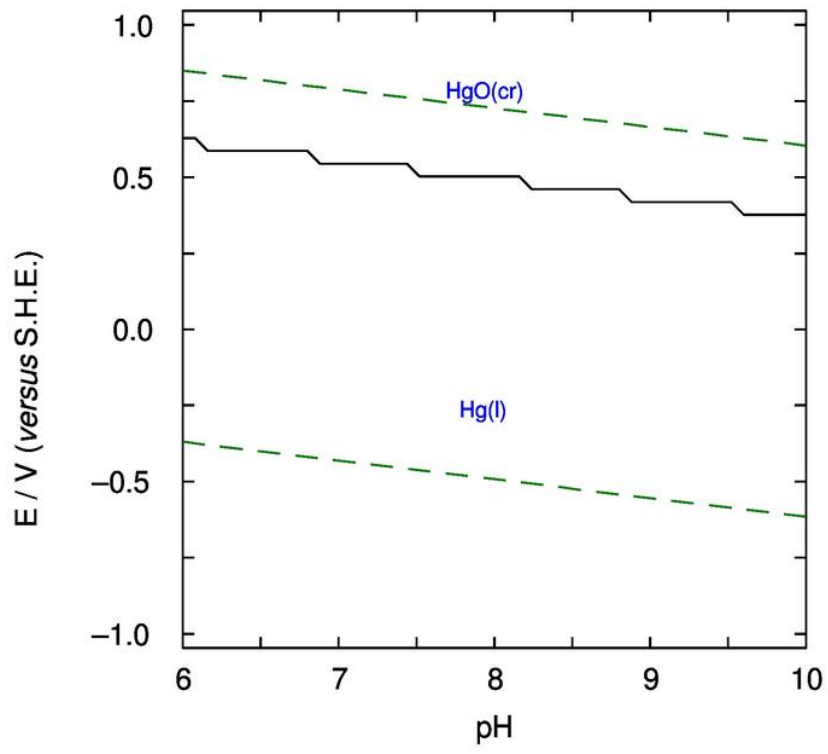

## Al



# HgAu

## Hg



## Au

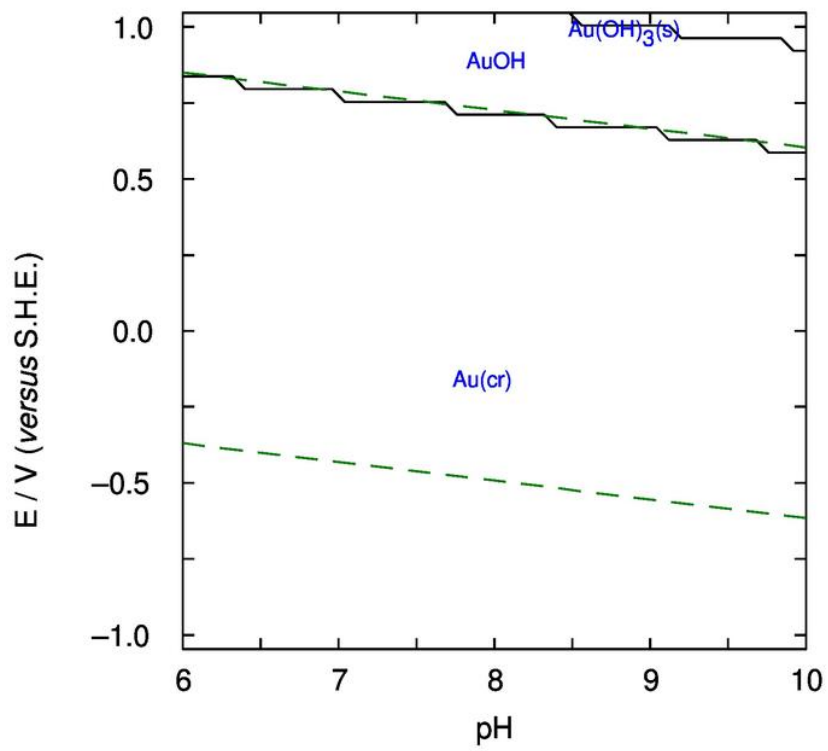

# HgBa

## Hg



## Ba





# HgCd

## Hg



## Cd



# HgCe

## Hg



## Ce



# HgCo

## Hg



## Co



# HgCr

## Hg



## Cr



# HgCu

## Hg



## Cu



# HgEu

## Hg



## Eu



# HgFe

## Hg



## Fe



# HgGd

## Hg



## Gd





# HgIn

## Hg



## In



# HgLa

## Hg



## La



# HgMn

## Hg



## Mn



# HgMo

## Hg



## Mo



# HgNd

## Hg



## Nd



# HgNi

## Hg



## Ni



# HgPr

## Hg



## Pr



# HgRb

## Hg



## Rb





# HgS

## Hg

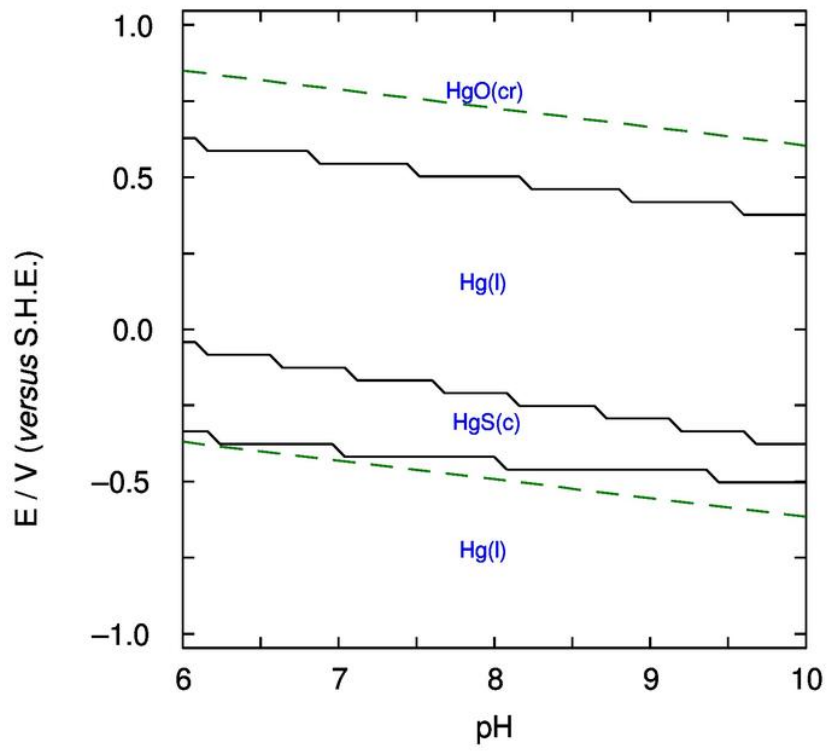

## S

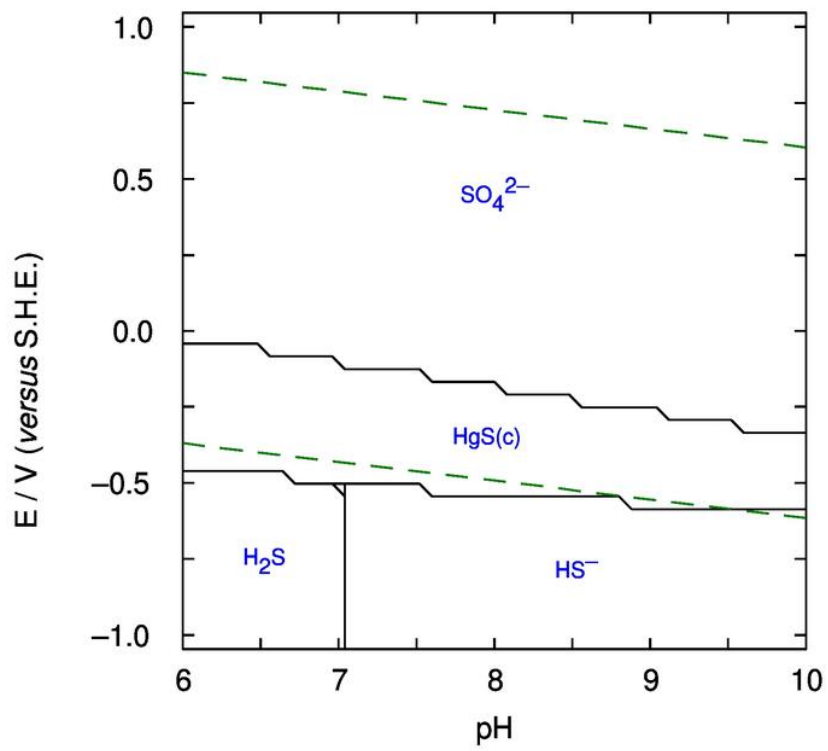

# HgSe

## Hg



## Se

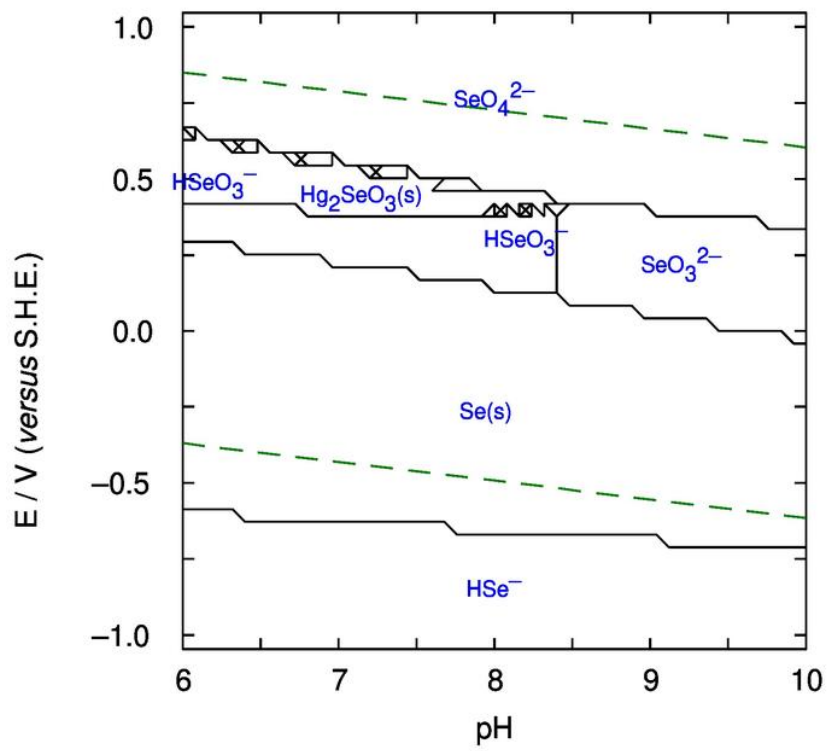

# HgSm

## Hg



## Sm



# HgSn

## Hg



## Sn



# HgSr

## Hg



## Sr



# HgTe

## Hg



## Te



# HgV

## Hg



## V



# HgW

## Hg



## W

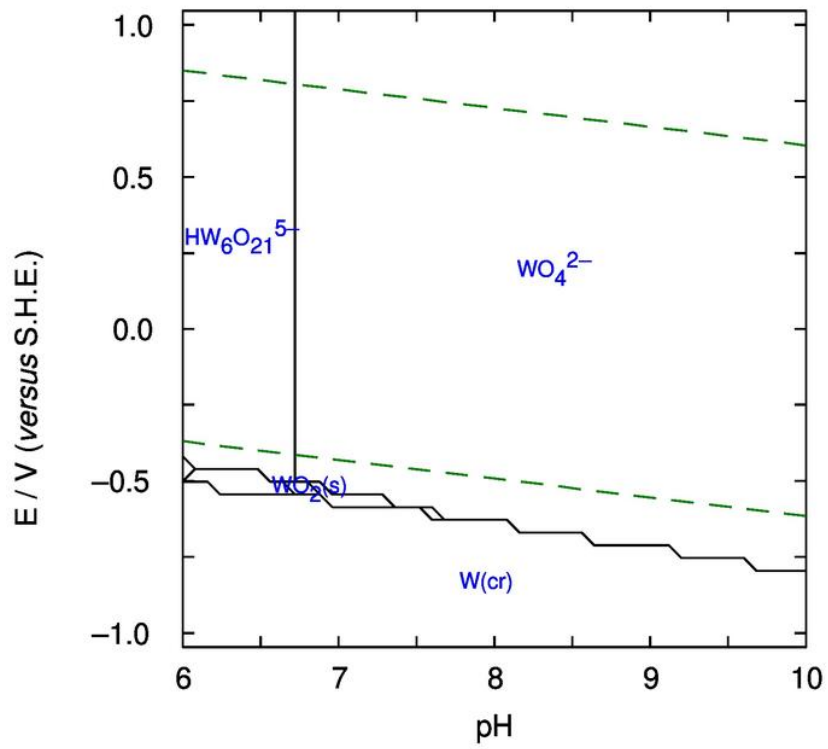



# HgY

## Hg



## Y



# HgZn

## Hg



## Zn



# HgZr

## Hg



## Zr



# InAg

## In

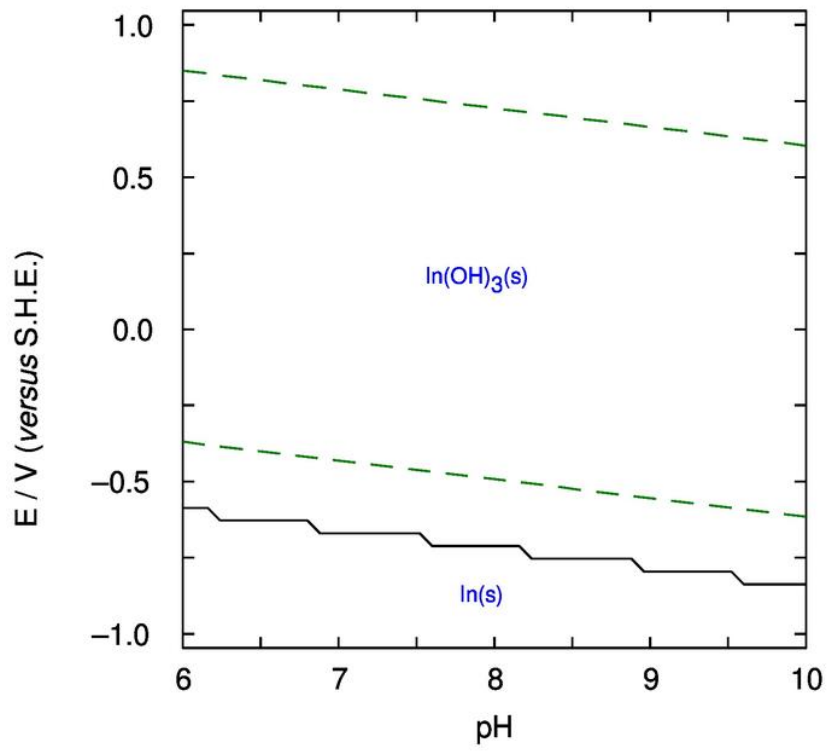

## Ag



# InAl

## In

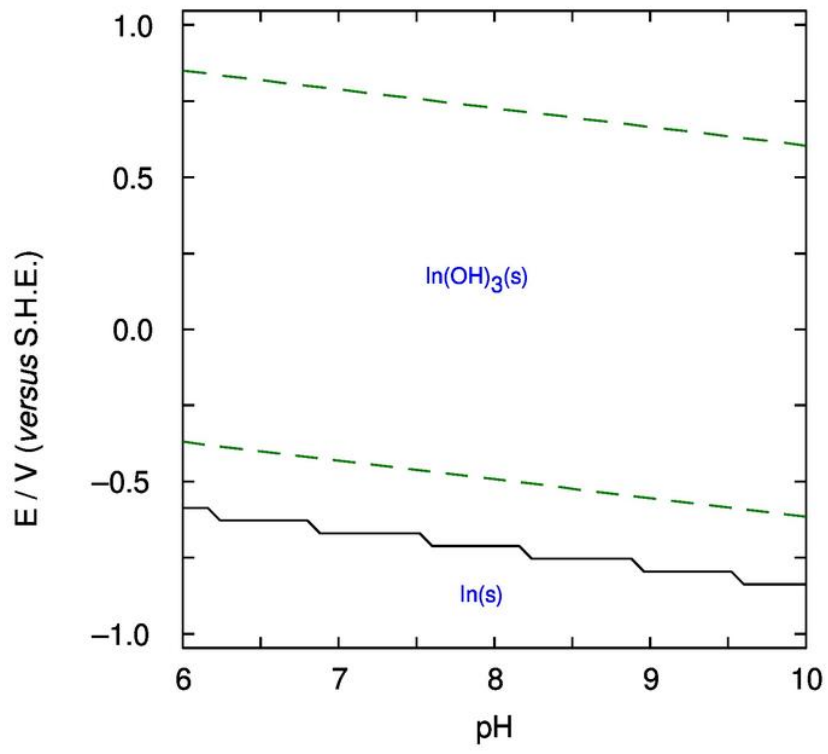

## Al



# InCd

## In



## Cd



# InCo

## In



## Co



# InCr

## In



## Cr





# InCu

## In



## Cu



# InFe

## In



## Fe



# InMn

## In



## Mn



# InMo

## In



## Mo



# InNi

## In



## Ni



# InRb

## In



## Rb



# InS

## In



## S

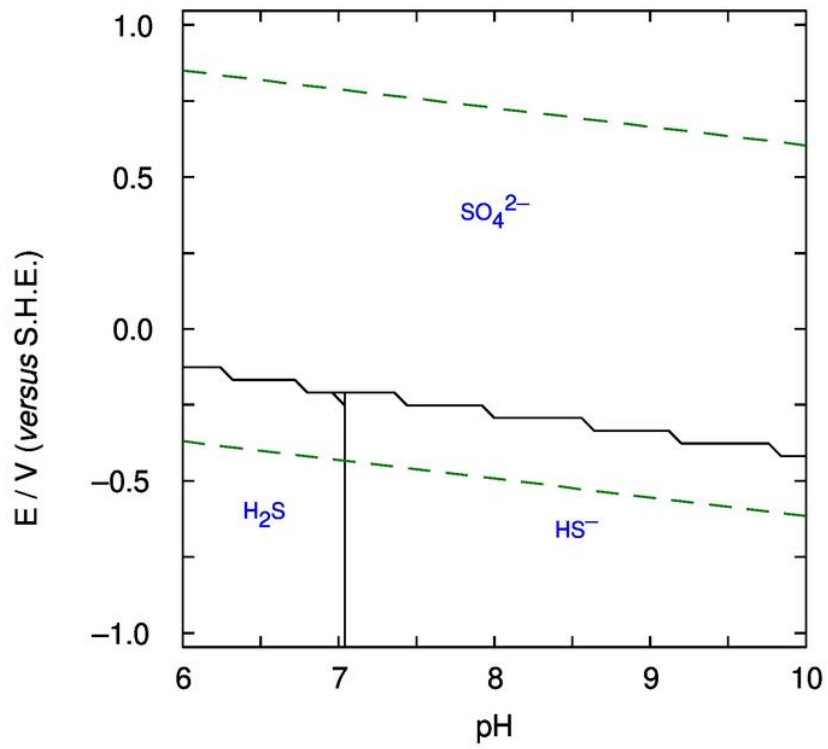

# InSe

## In

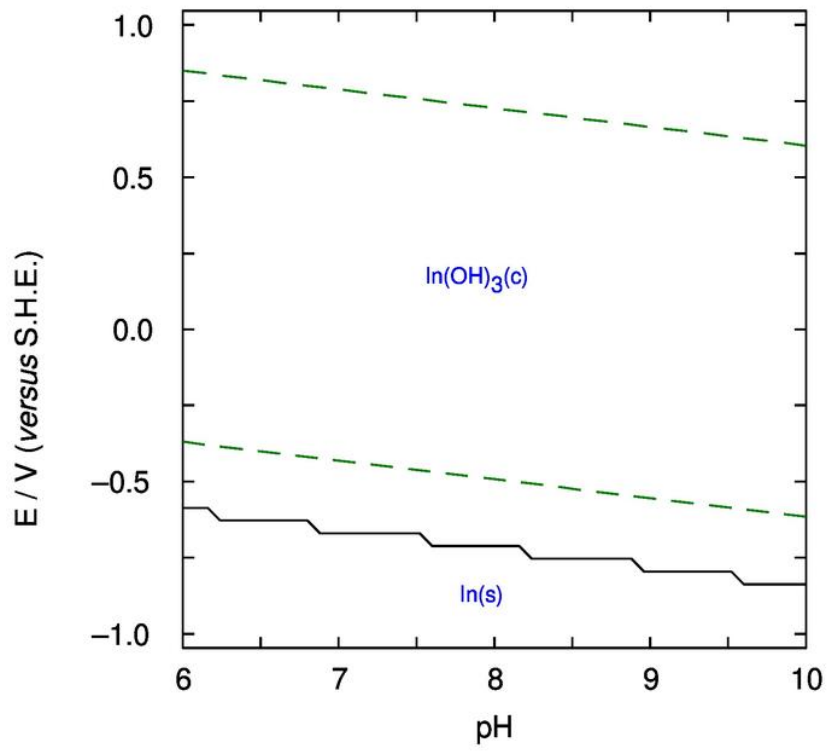

## Se

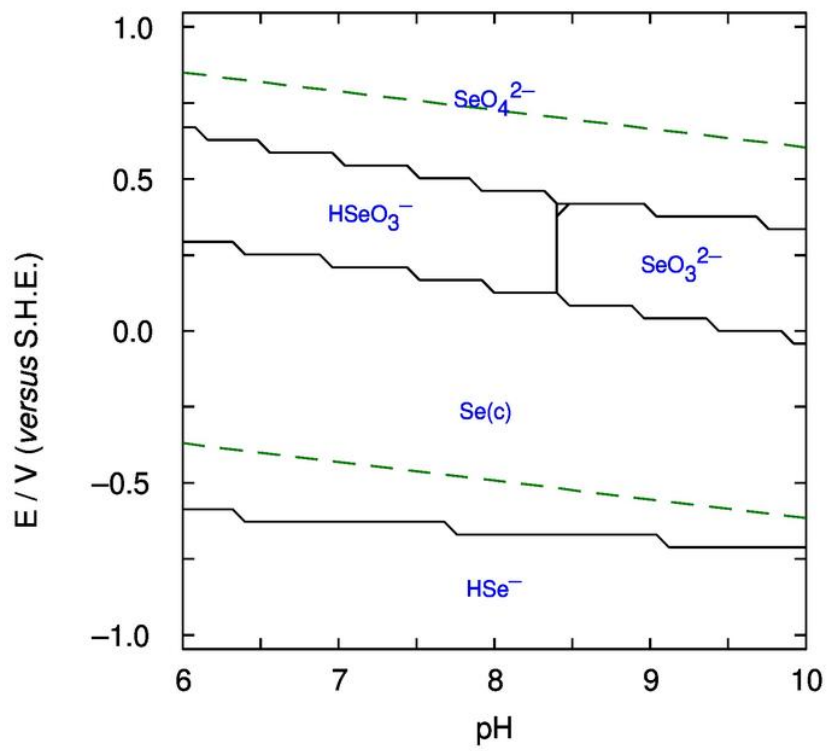



# InSr

## In



## Sr



# InV

## In



## V



# InY

## In



## Y



# InZn

## In



## Zn



# InZr

## In



## Zr

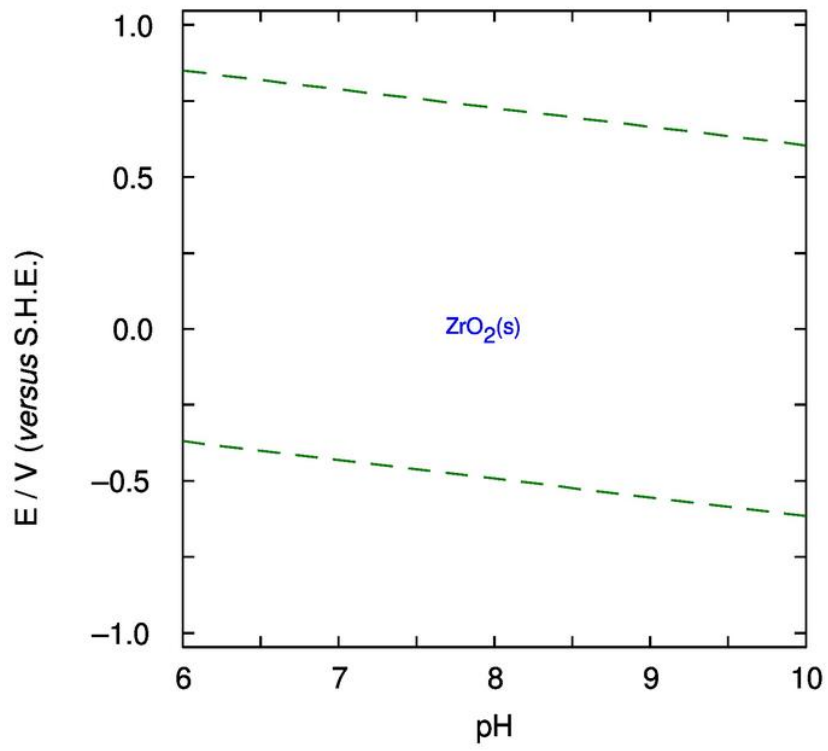

# LaAg

## La

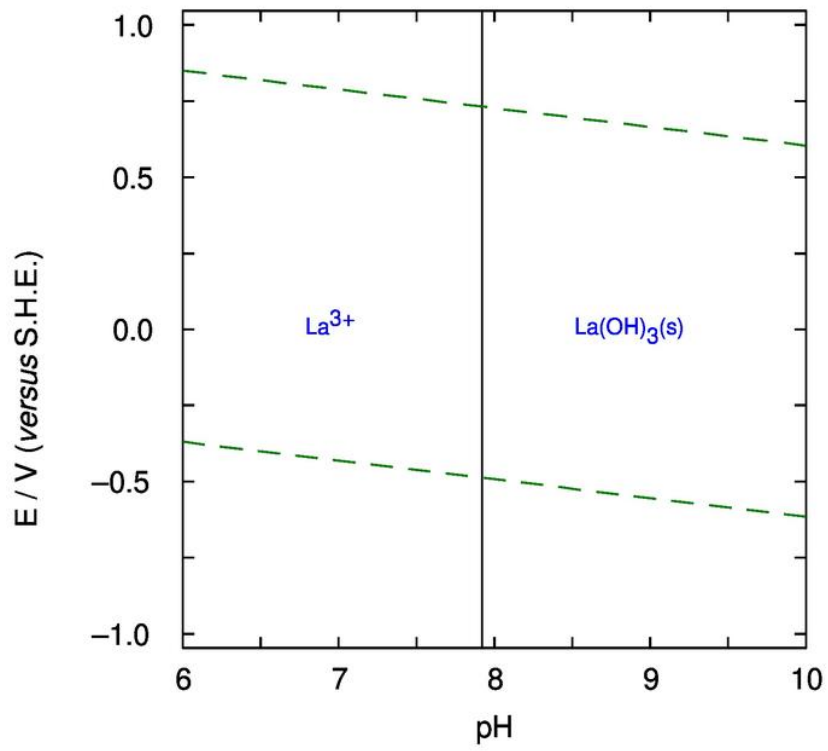

## Ag



# LaAl

## La



## Al



# LaBa

## La



## Ba





# LaCd

## La



## Cd



# LaCo

## La



## Co



# LaCr

## La



## Cr



# LaCu

## La



## Cu



# LaFe

## La



## Fe



# LaIn

## La



## In



# LaMn

## La



## Mn



# LaMo

## La



## Mo





# LaNi

## La



## Ni



# LaRb

## La

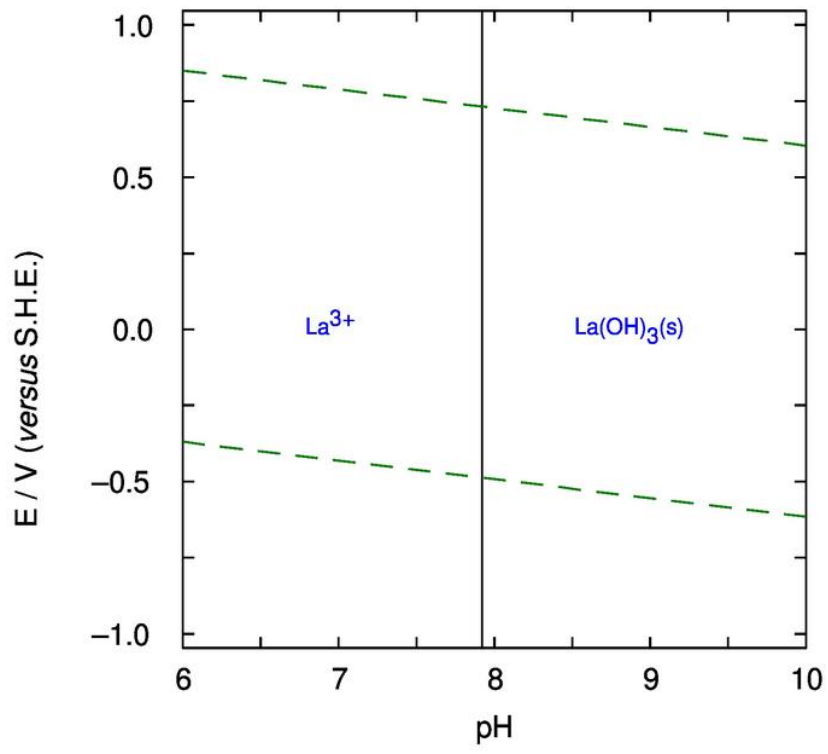

## Rb



# LaS

## La

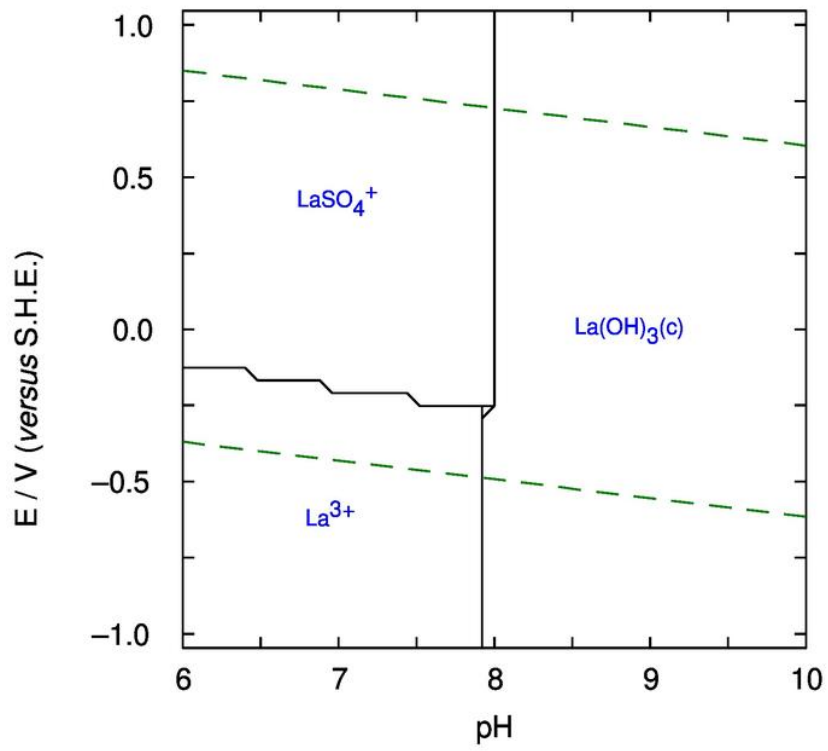

## S

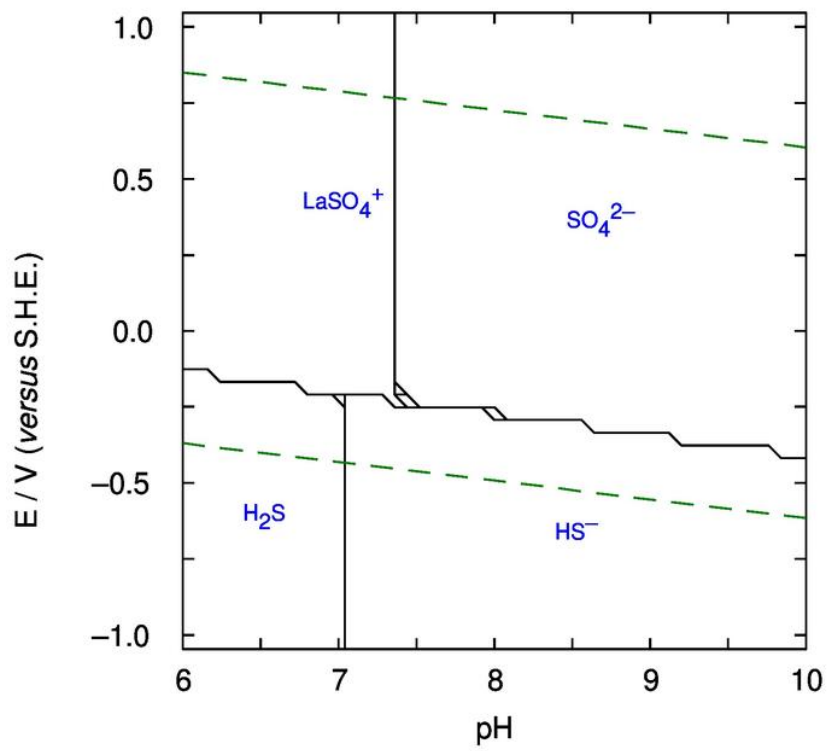

# LaSe

## La



## Se



# LaSn

## La



## Sn



# LaSr

## La



## Sr



# LaTe

## La



## Te



# LaV

## La



## V





# LaY

## La



## Y



# LaZn

## La



## Zn



# LaZr

## La



## Zr



# LiAg

## Li

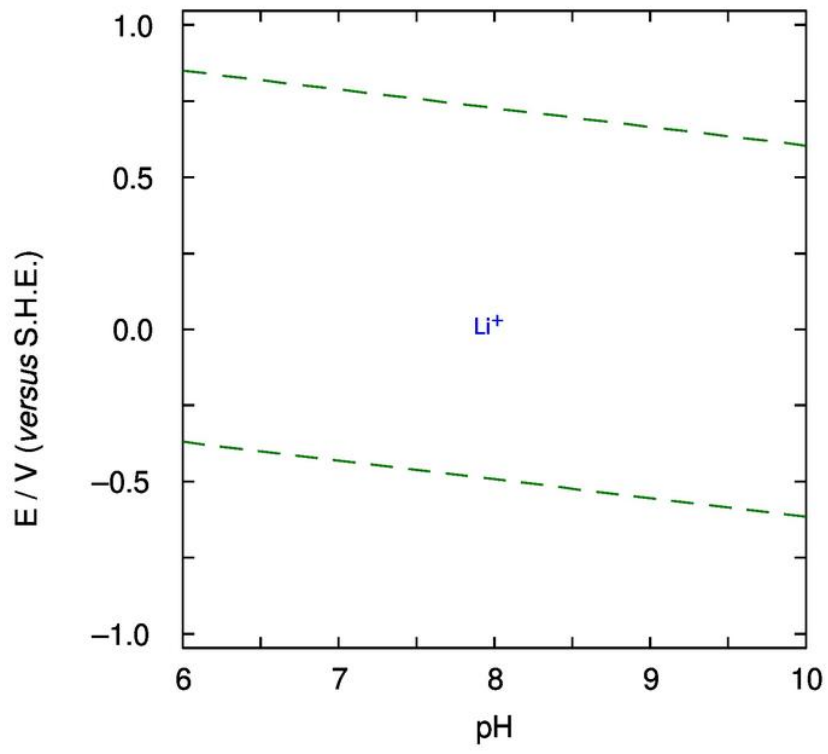

## Ag



# LiAl

## Li



## Al



# LiAu

## Li



## Au



# LiB

## Li



## B

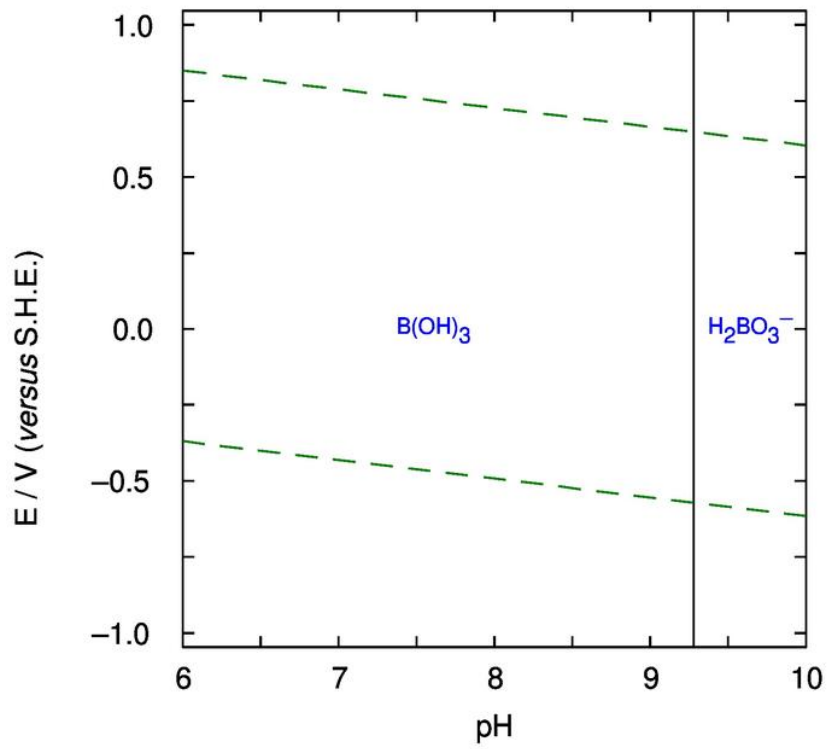

# LiBa

## Li



## Ba

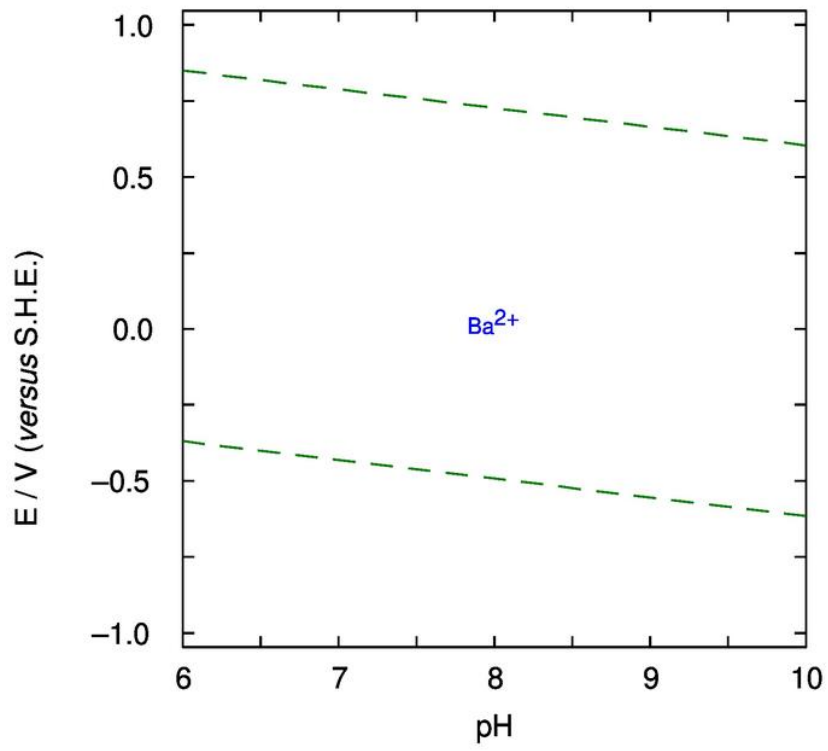



# LiCd

## Li



## Cd



# LiCe

## Li



## Ce



# LiCo

## Li



## Co



# LiCr

## Li



## Cr



# LiCu

## Li



## Cu



# LiEu

## Li



## Eu

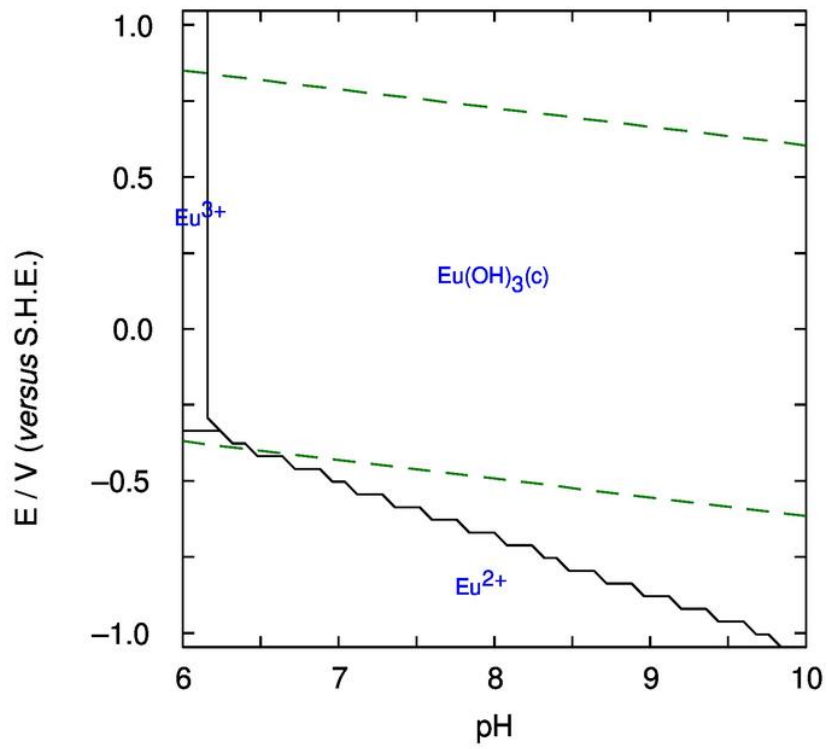

# LiFe

## Li



## Fe

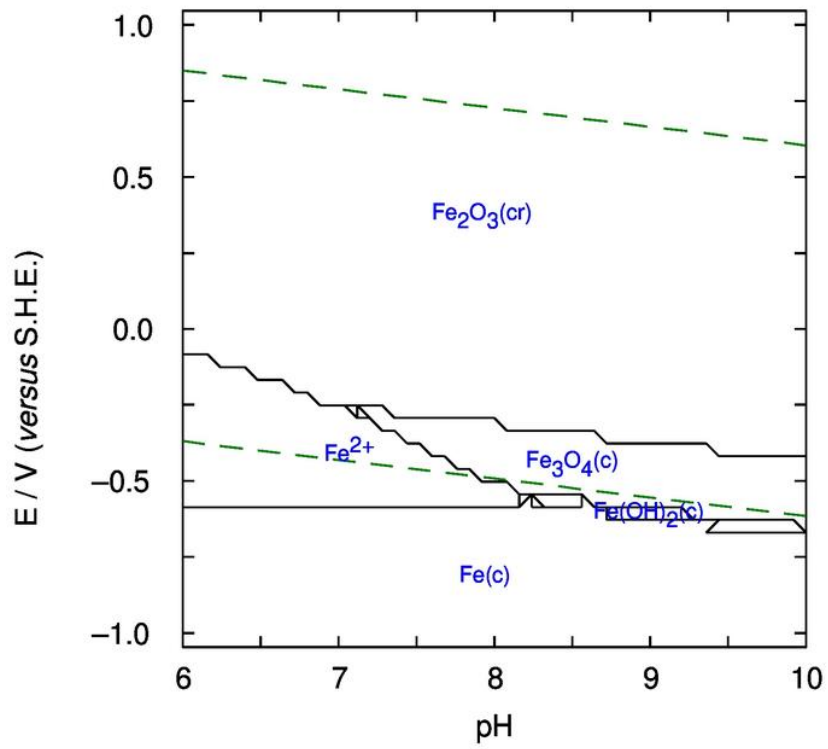

# LiGd

## Li



## Gd

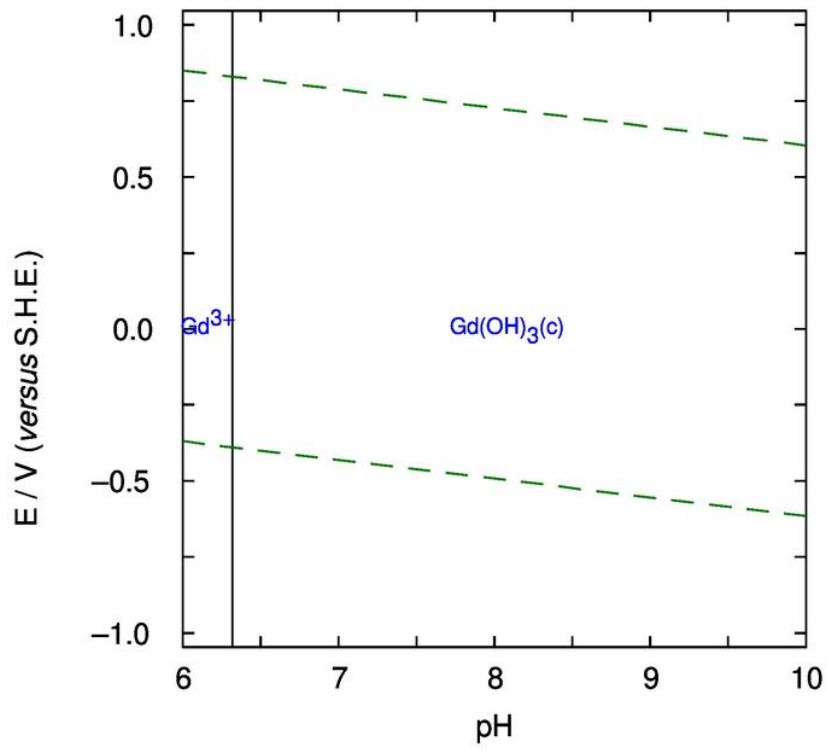



# LiHg

## Li



## Hg



# LiIn

## Li



## In

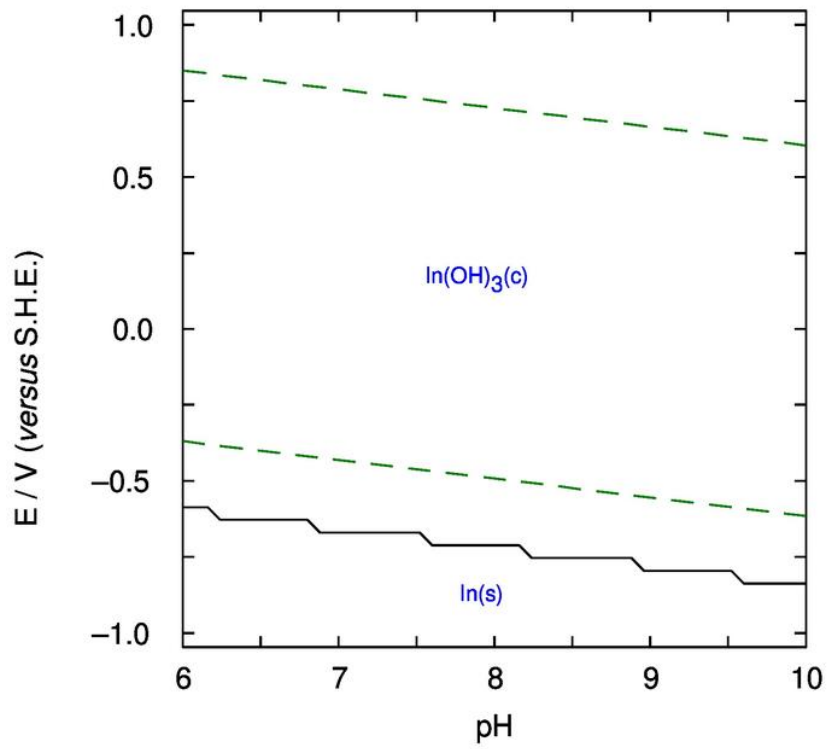

# LiLa

## Li



## La



# LiMn

## Li



## Mn

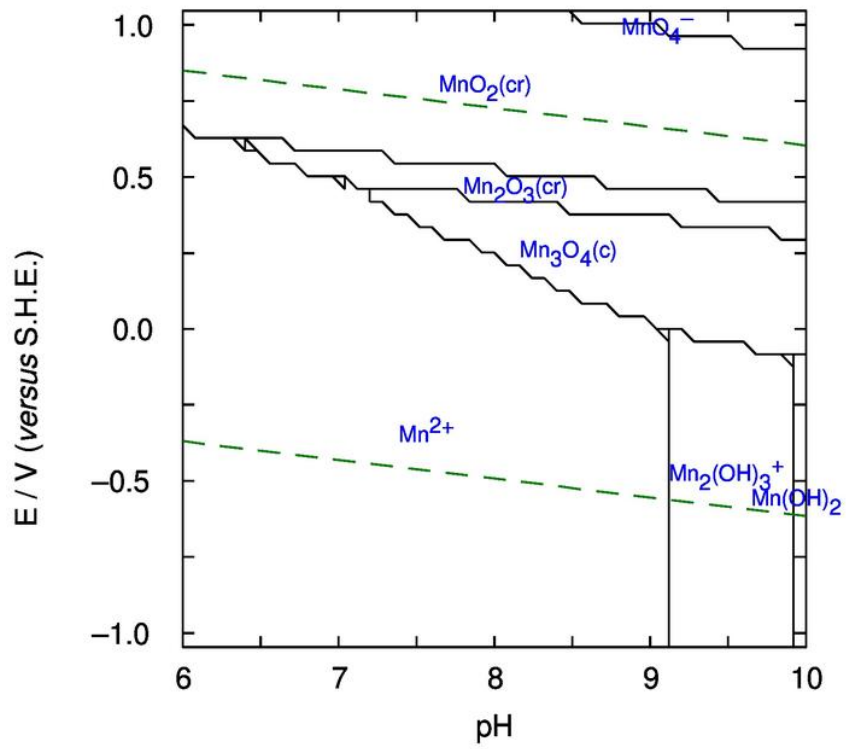

# LiMo

## Li



## Mo



# LiNd

## Li



## Nd



# LiNi

## Li



## Ni



# LiPb

## Li



## Pb

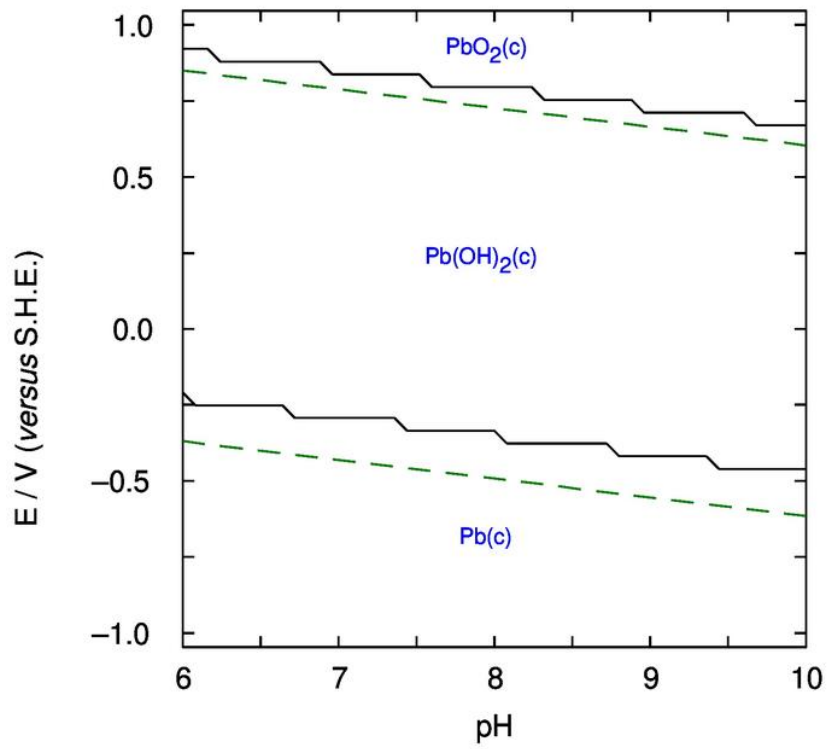



# LiPr

## Li

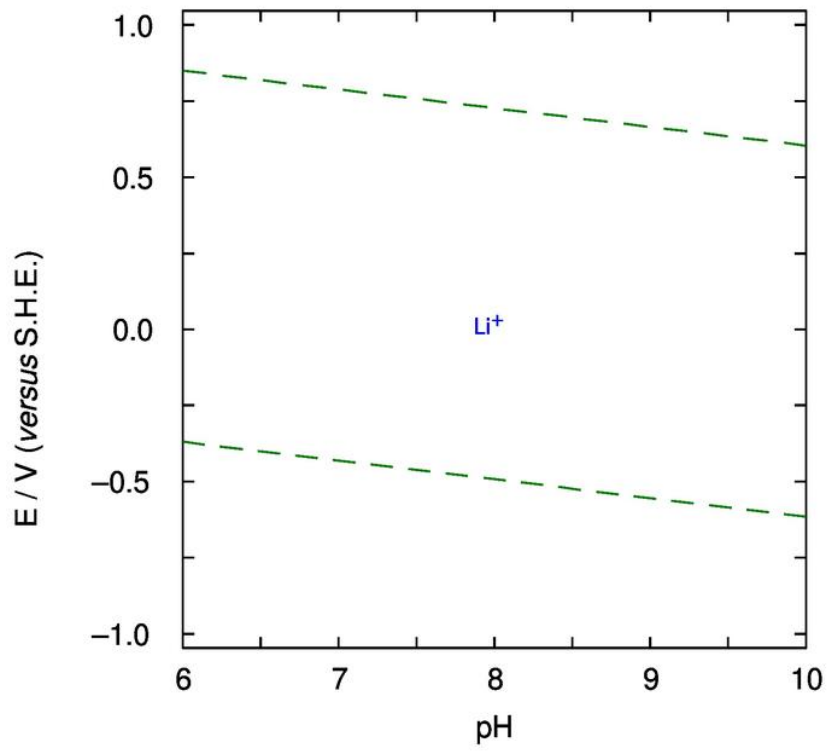

## Pr



# LiRb

## Li

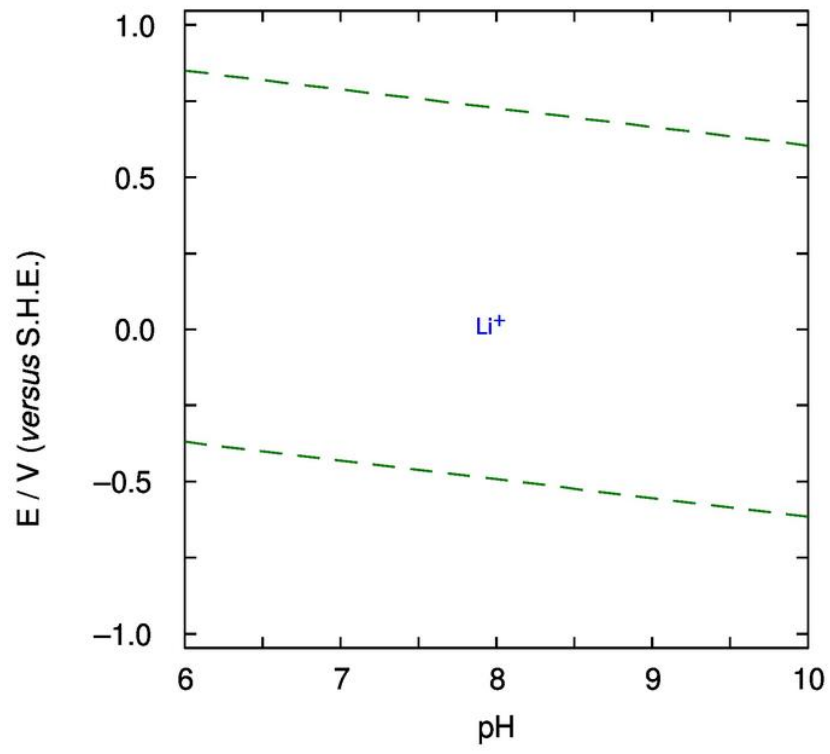

## Rb

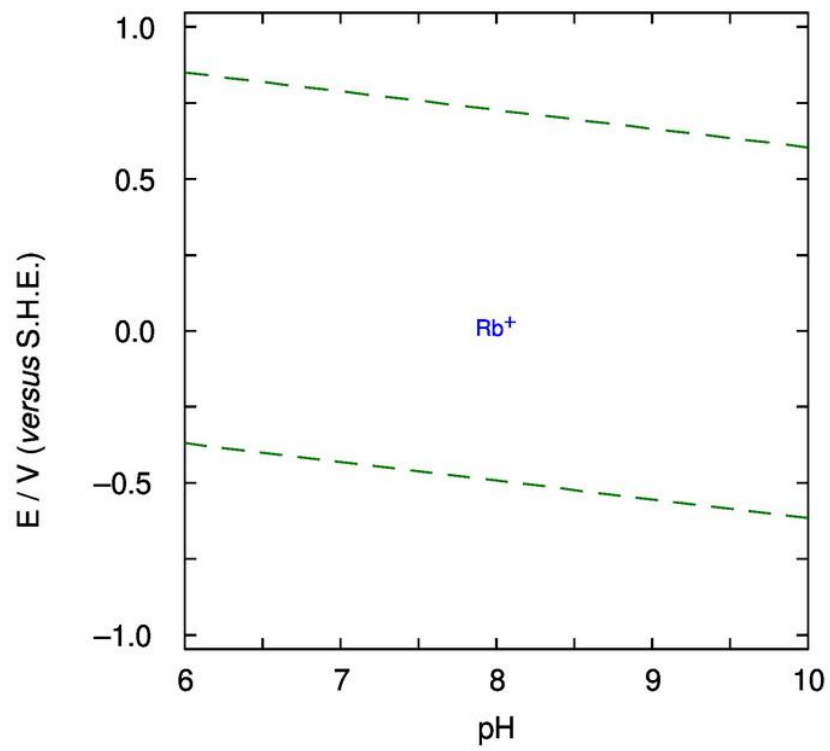

# LiS

## Li



## S

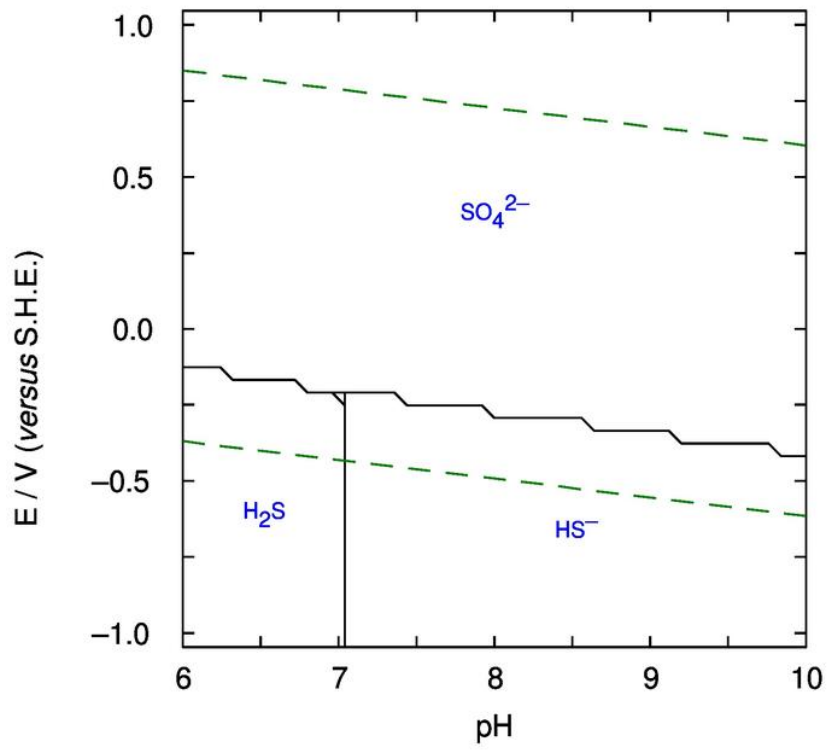

# LiSe

## Li



## Se



# LiSm

## Li



## Sm



# LiSn

## Li

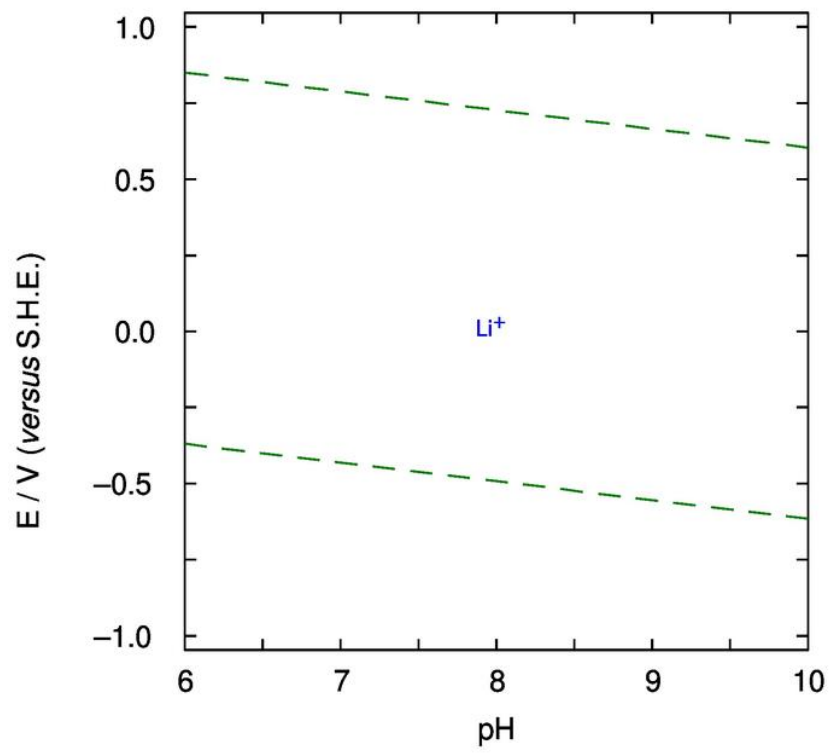

## Sn

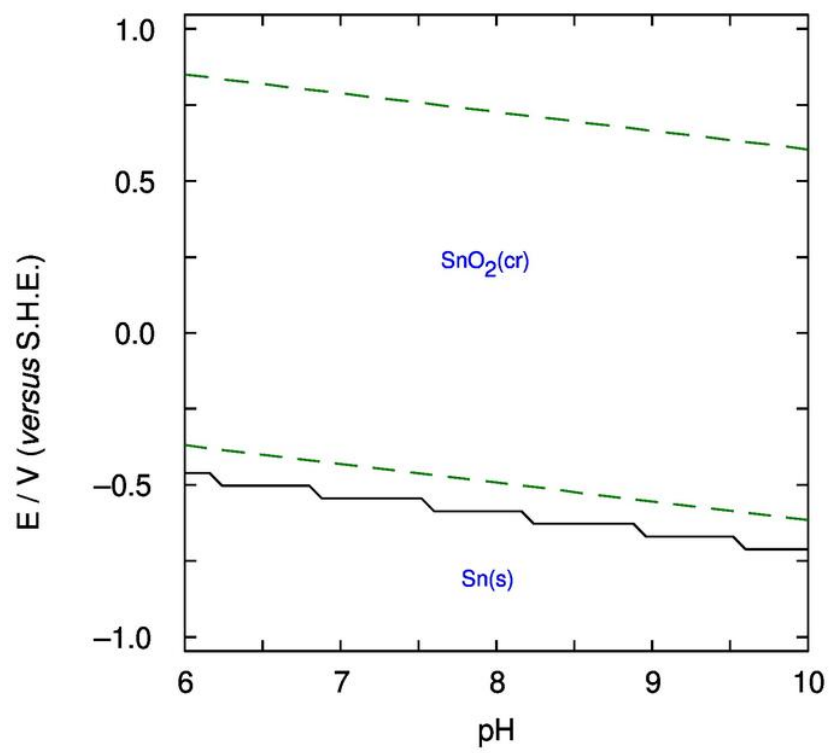

# LiSr

## Li



## Sr



# LiTe

## Li

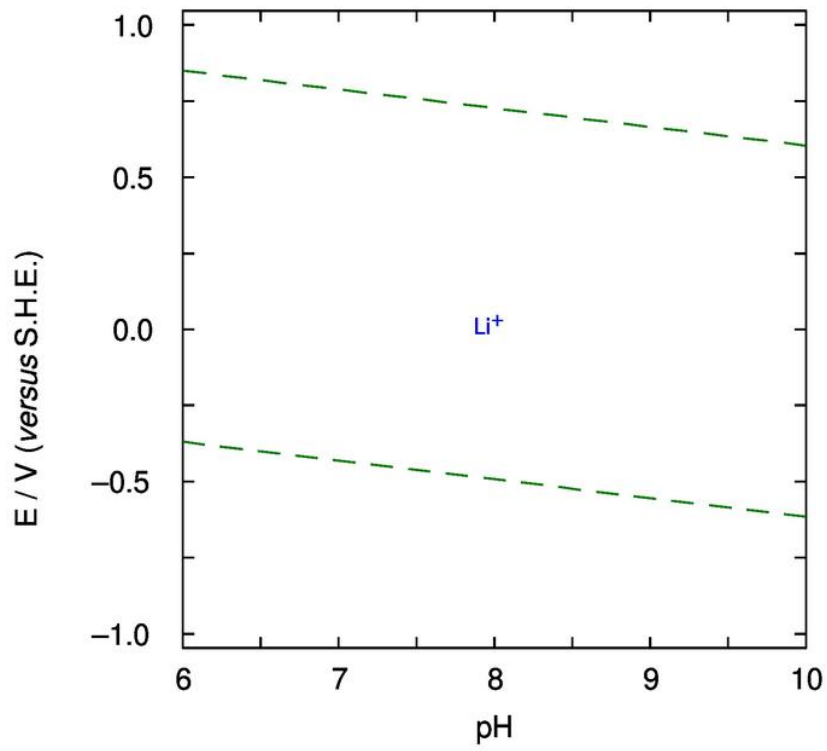

## Te





# LiV

## Li



## V



# LiW

## Li



## W



# LiY

## Li



## Y



# LiZn

## Li



## Zn



# LiZr

## Li



## Zr

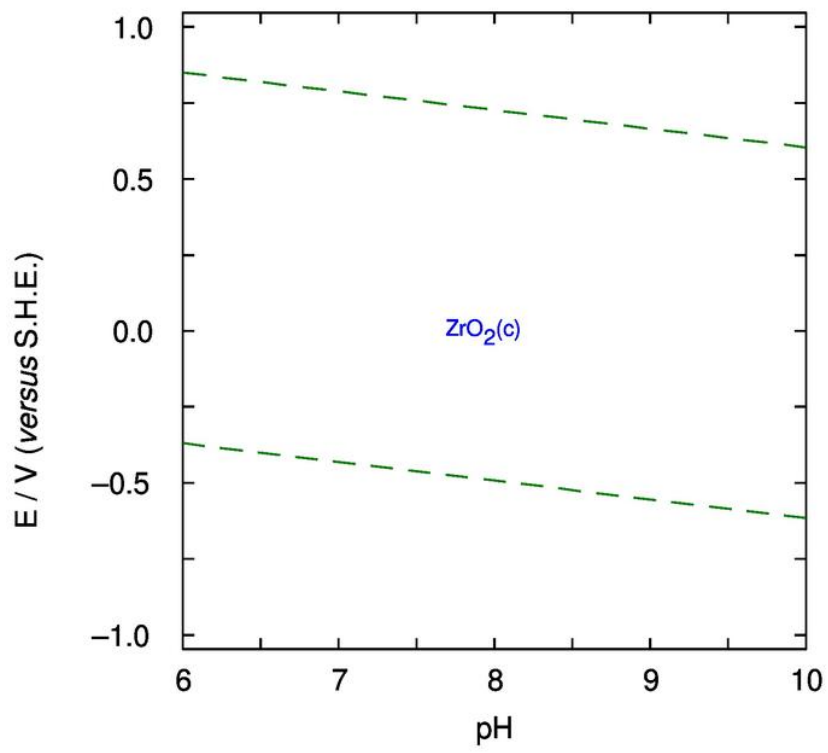

# MnCu

## Mn

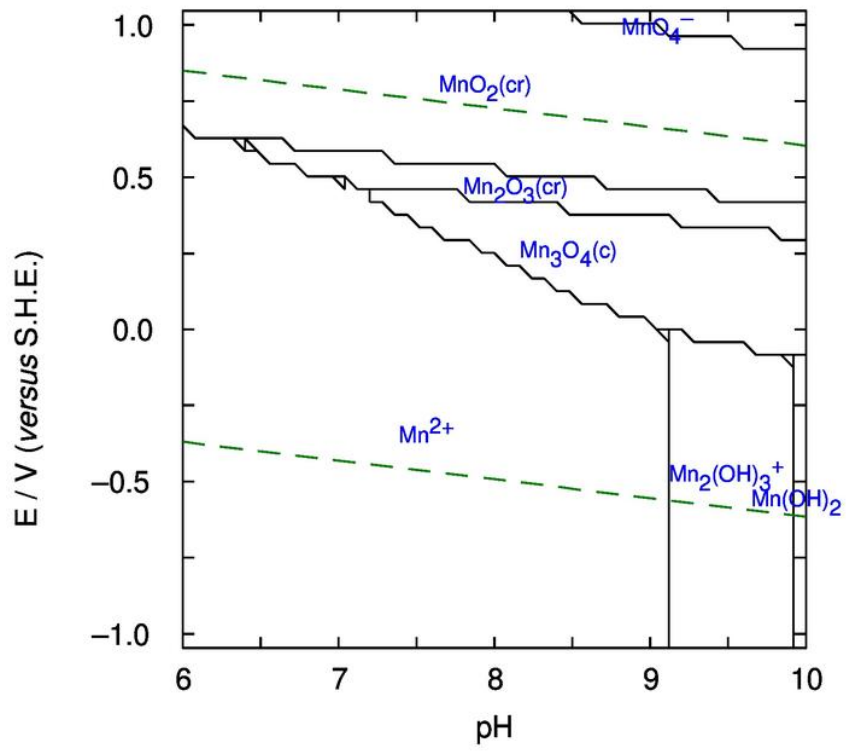

## Cu



# MnFe

## Mn

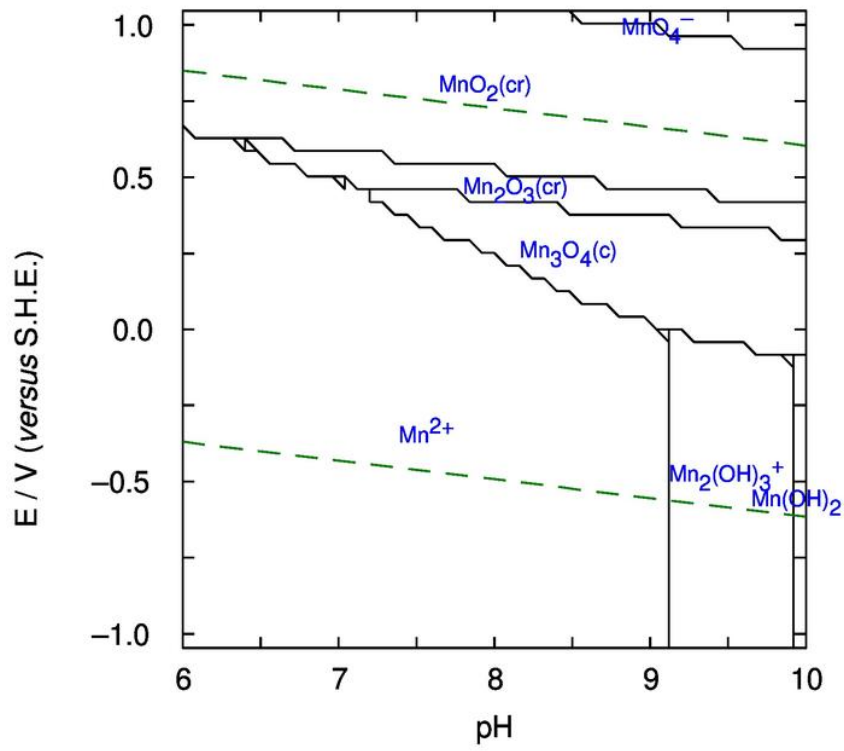

## Fe



# MnRb

## Mn



## Rb





# MnS

## Mn

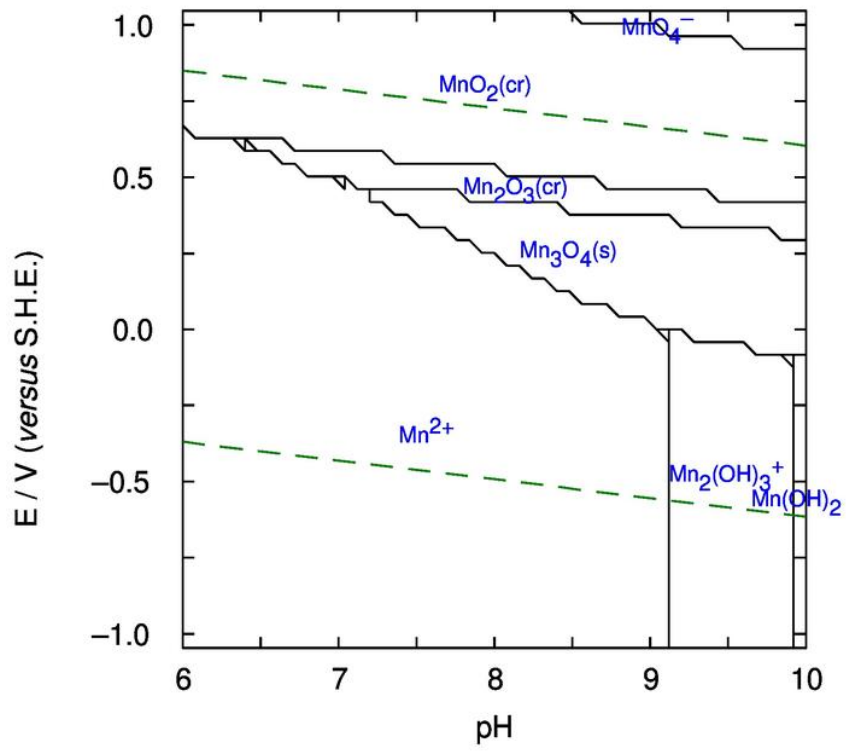

## S



# MnSe

## Mn

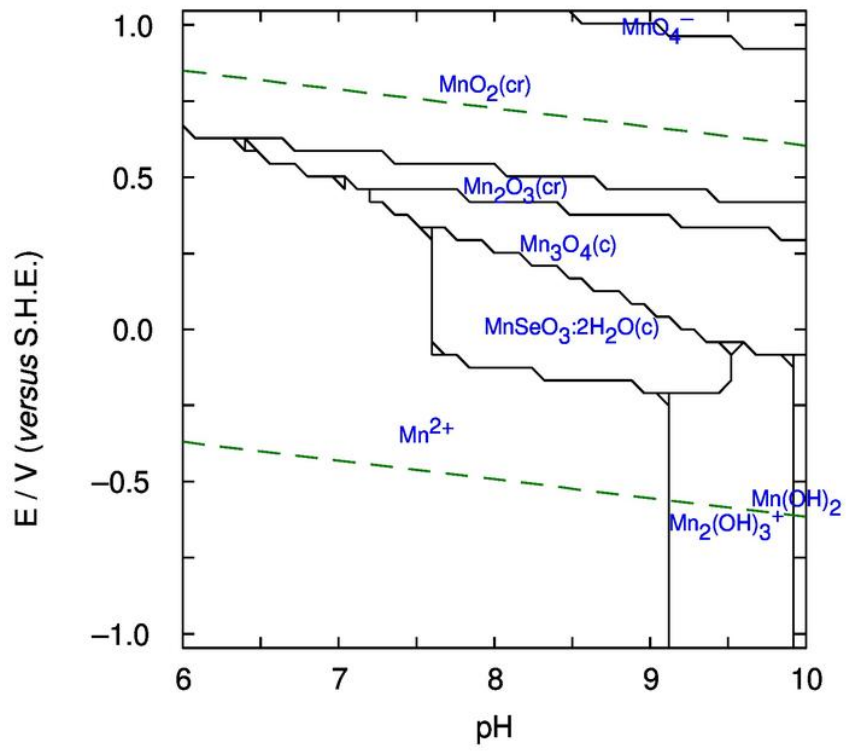

## Se

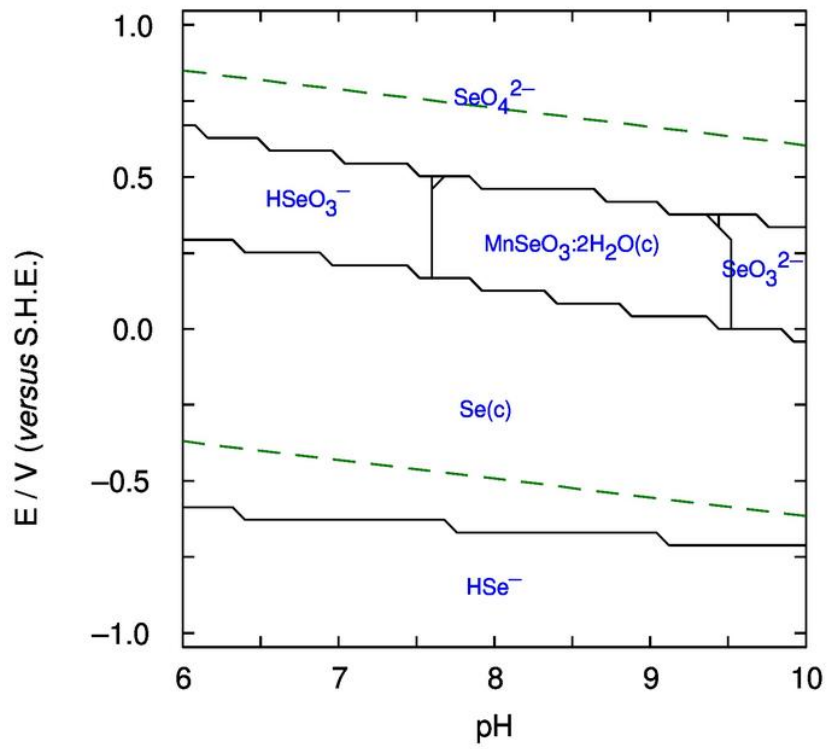

# MnV

## Mn



## V



# MnY

## Mn



## Y



# MnZr

## Mn



## Zr



# MoAg

## Mo

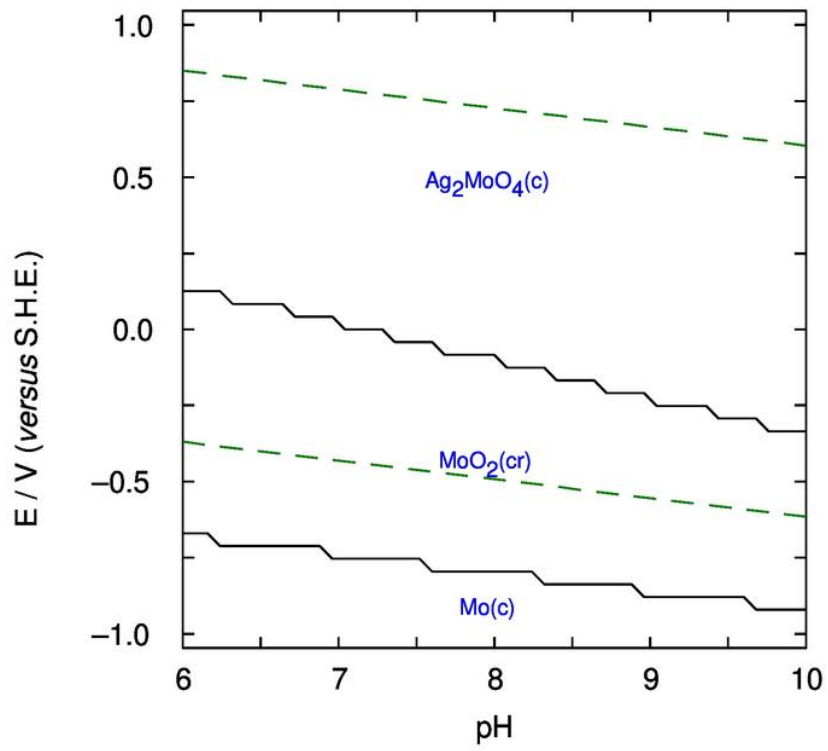

## Ag

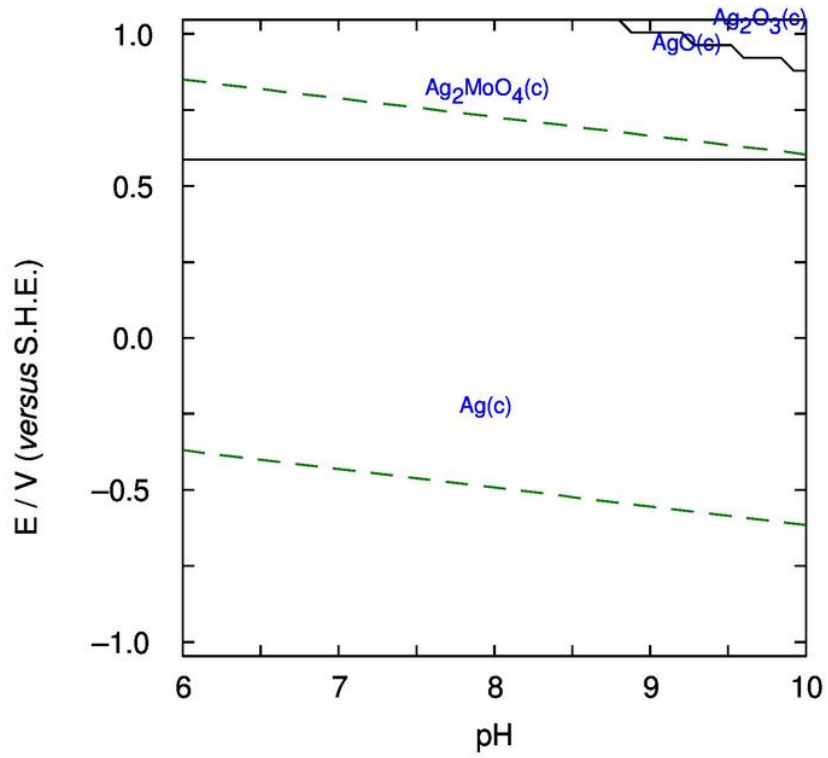

# MoCo

## Mo

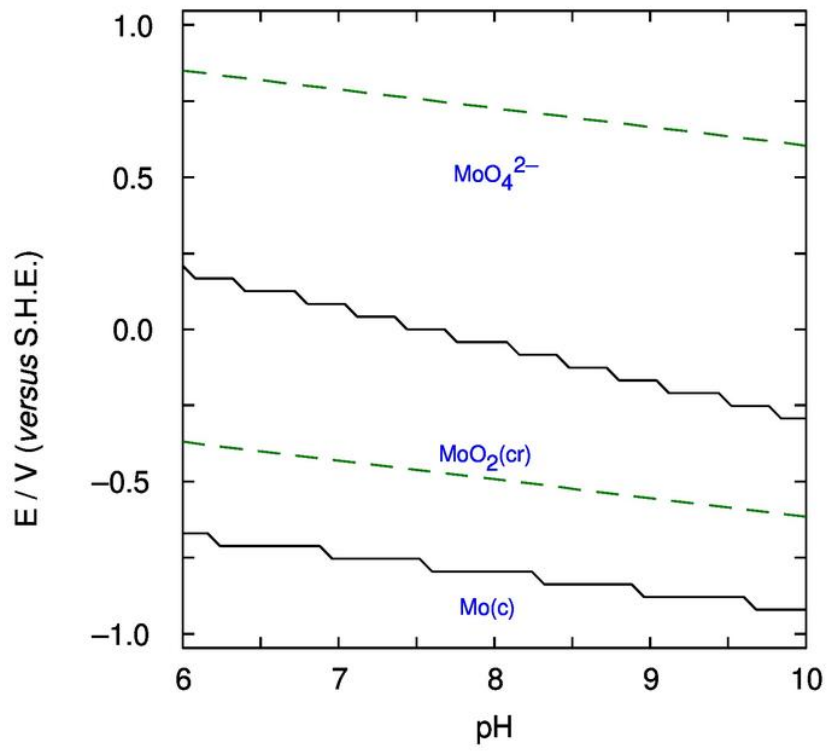

## Co



# MoCu

## Mo



## Cu





# MoFe

## Mo



## Fe



# MoMn

## Mo



## Mn



# MoNi

## Mo



## Ni



# MoS

## Mo

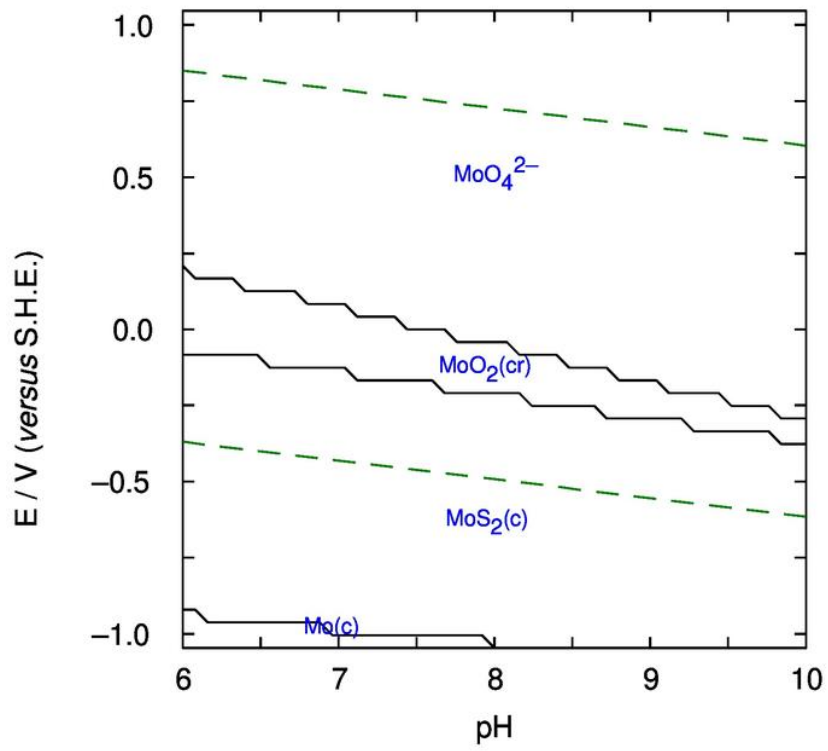

## S

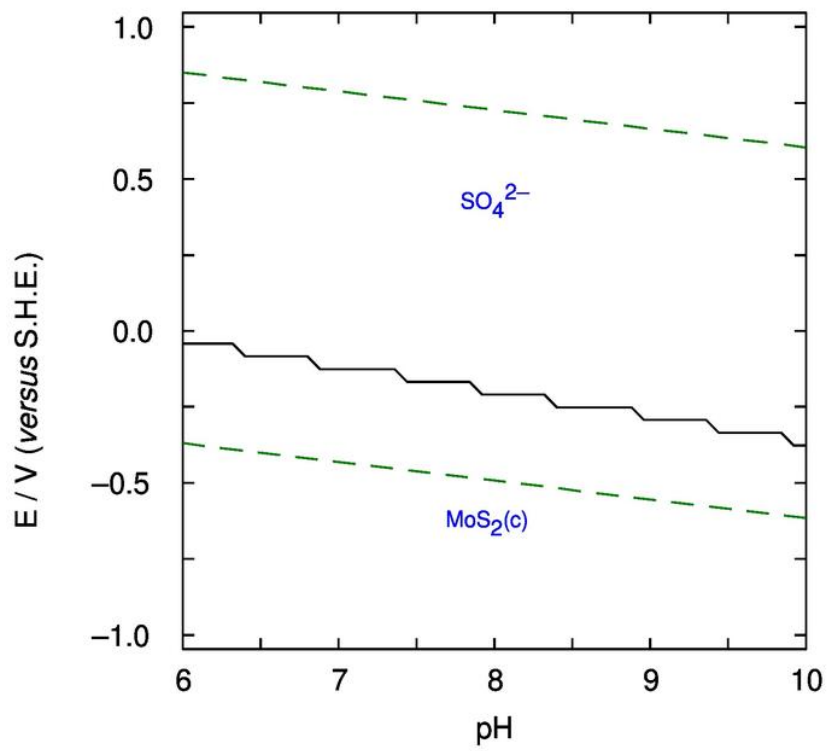

# MoSe

## Mo

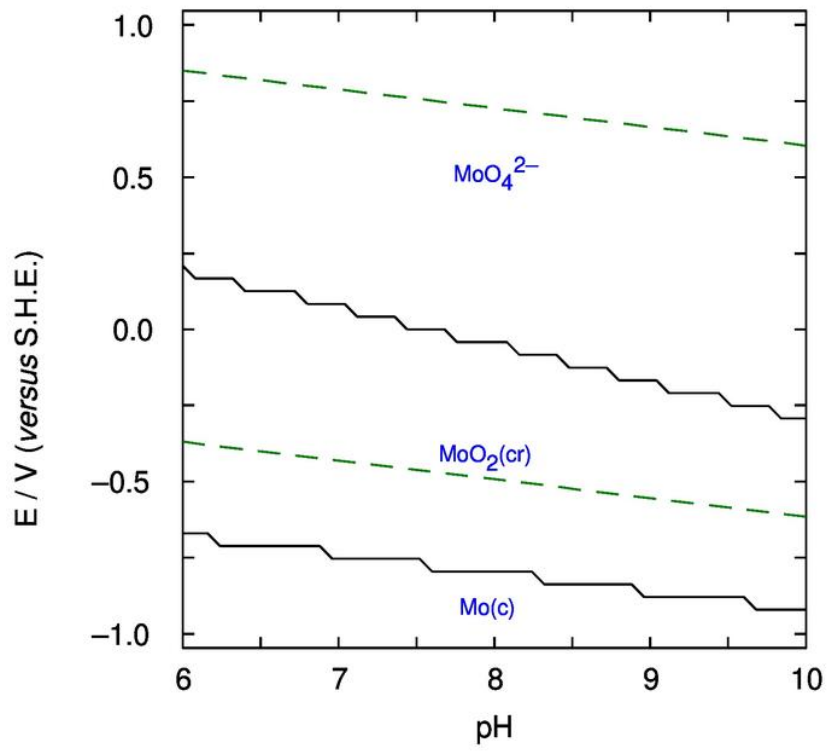

## Se

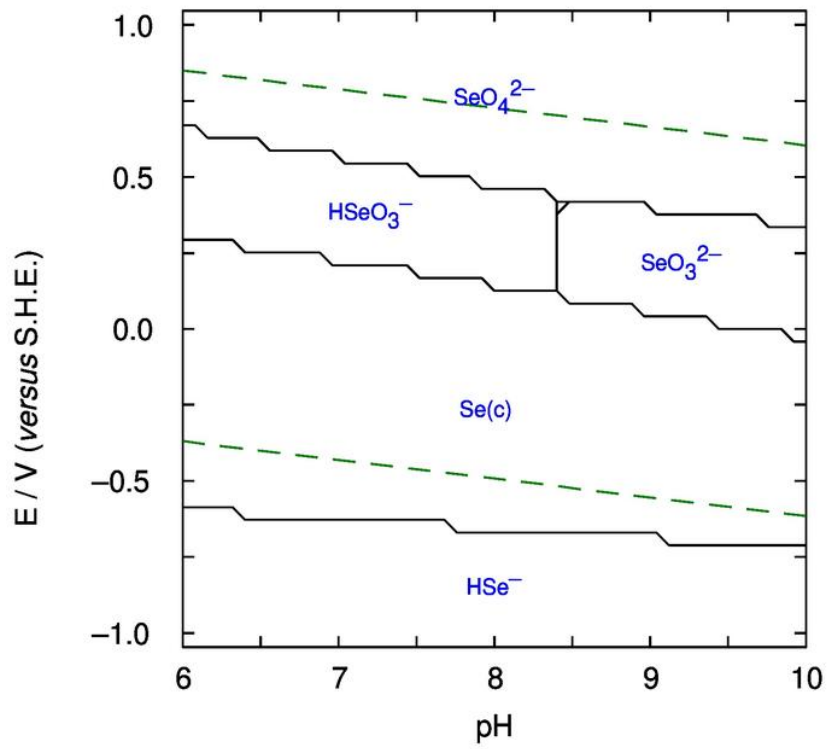

# MoZn

## Mo



## Zn

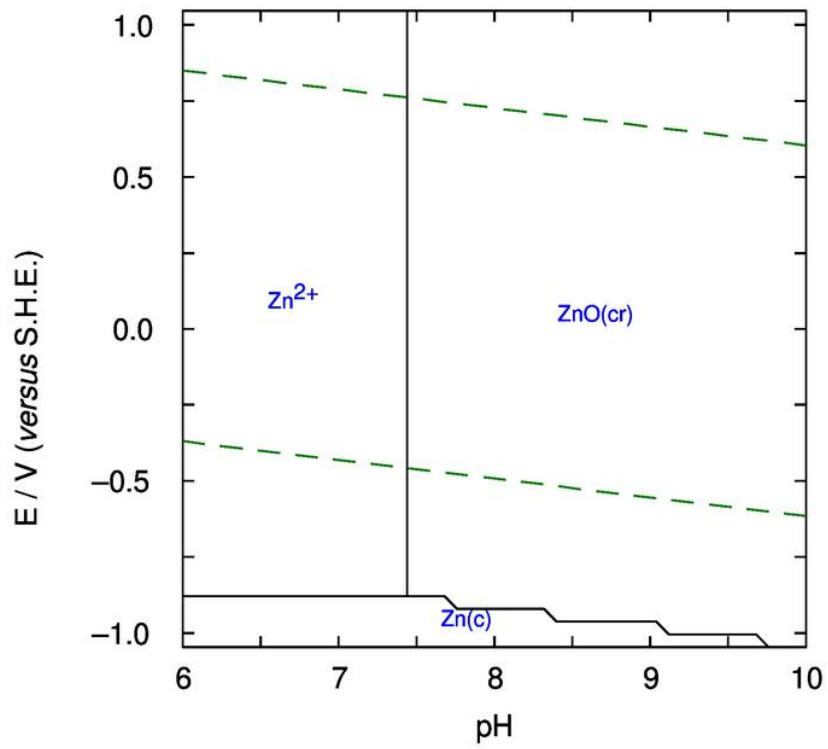

# NdAg

## Nd

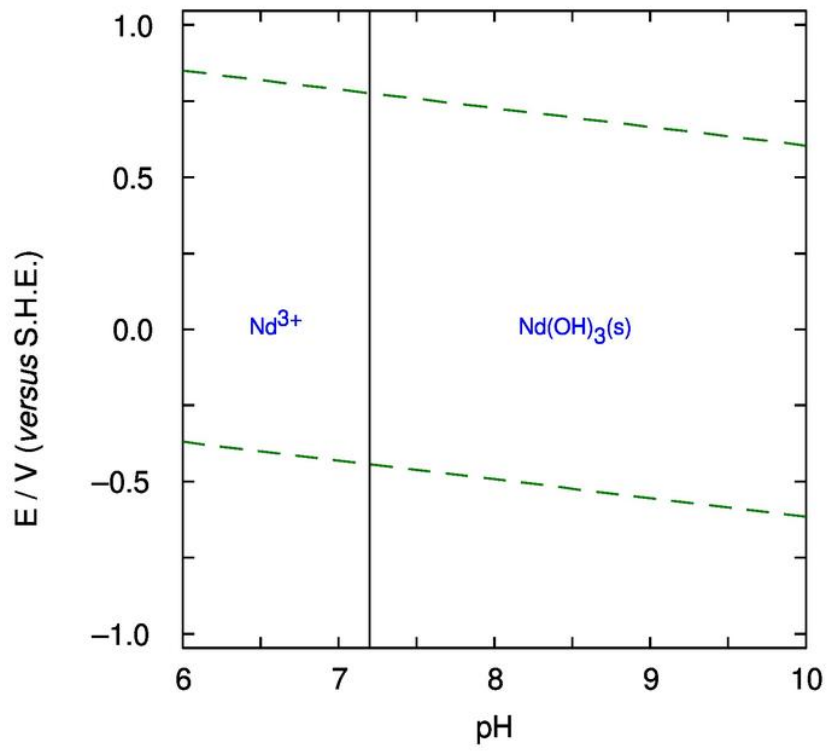

## Ag



# NdAl

## Nd



## Al





# NdBa

## Nd

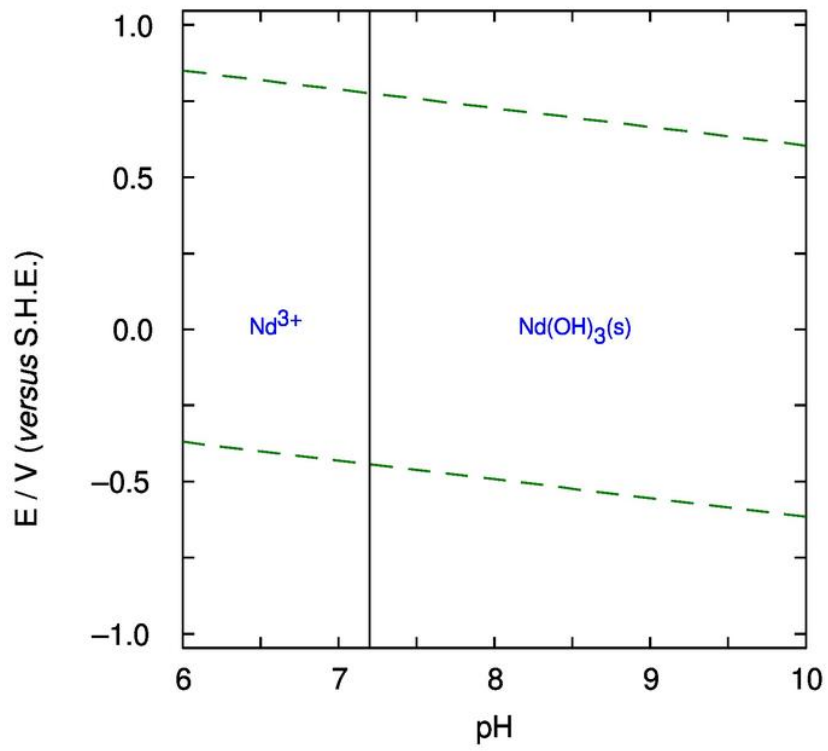

## Ba



# NdCd

## Nd



## Cd



# NdCe

## Nd



## Ce



# NdCo

## Nd



## Co



# NdCr

## Nd



## Cr



# NdCu

## Nd



## Cu



# NdFe

## Nd



## Fe



# NdIn

## Nd



## In





# NdLa

## Nd



## La



# NdMn

## Nd



## Mn



# NdMo

## Nd



## Mo



# NdNi

## Nd



## Ni



# NdPr

## Nd



## Pr



# NdRb

## Nd



## Rb



# NdS

## Nd

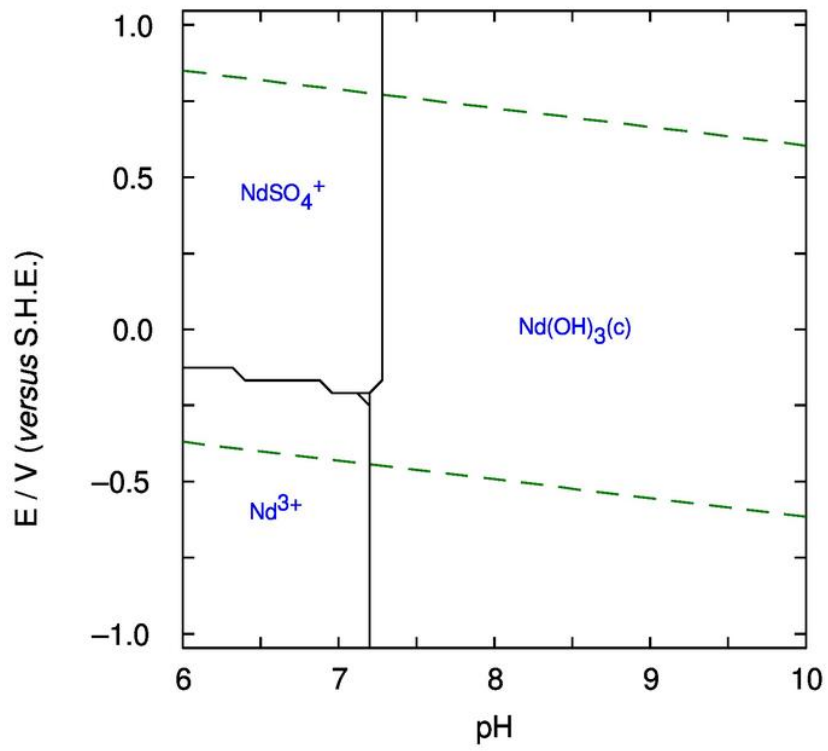

## S

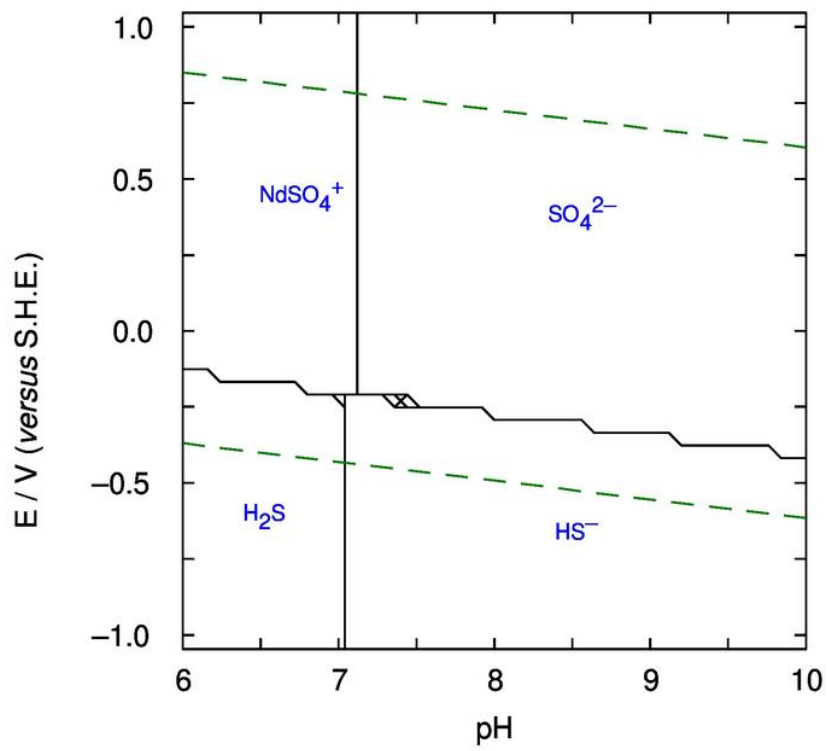

# NdSe

## Nd



## Se





# NdSn

## Nd



## Sn



# NdSr

## Nd



## Sr



# NdTe

## Nd



## Te



# NdV

## Nd



## V



# NdY

## Nd



## Y



# NdZn

## Nd



## Zn



# NdZr

## Nd



## Zr



# NiCo

## Ni

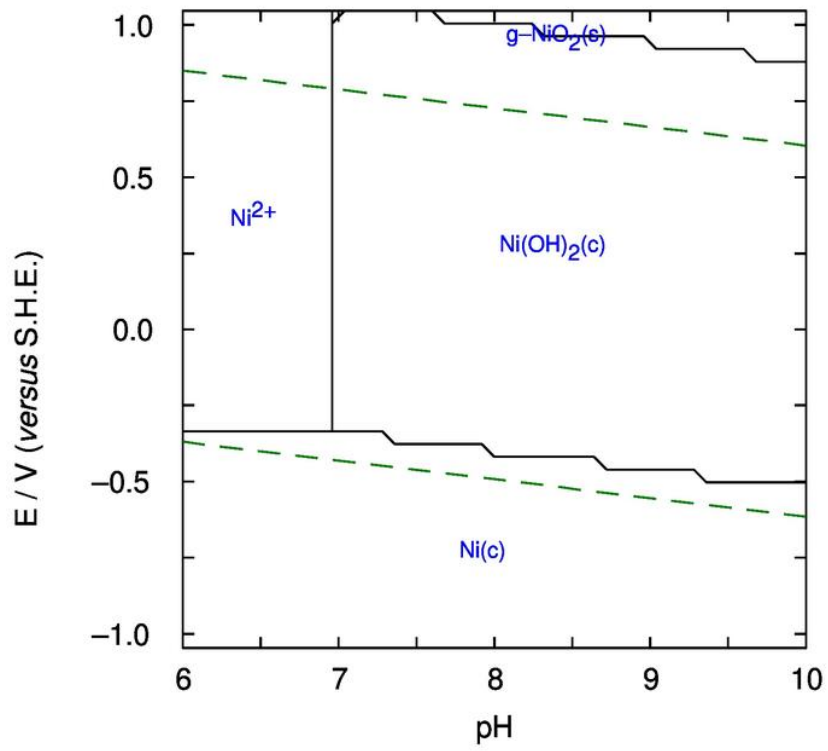

## Co





# NiCu

## Ni

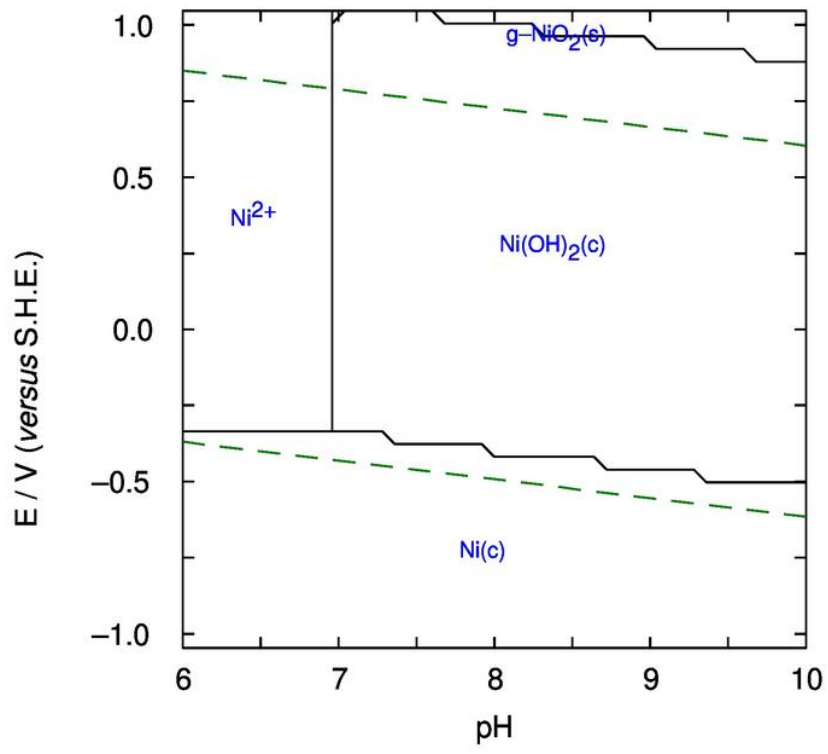

## Cu



# NiFe

## Ni

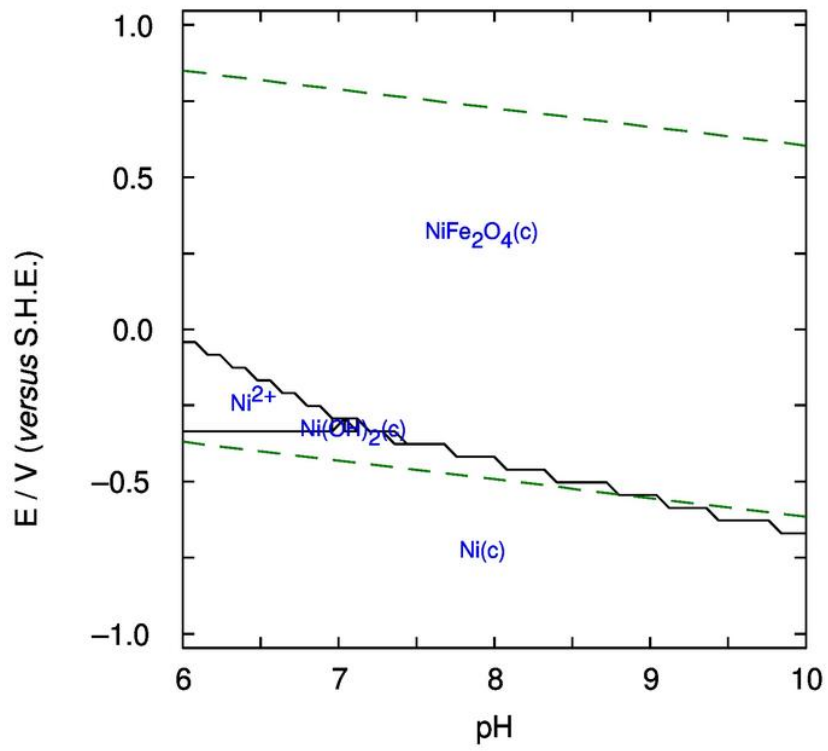

## Fe

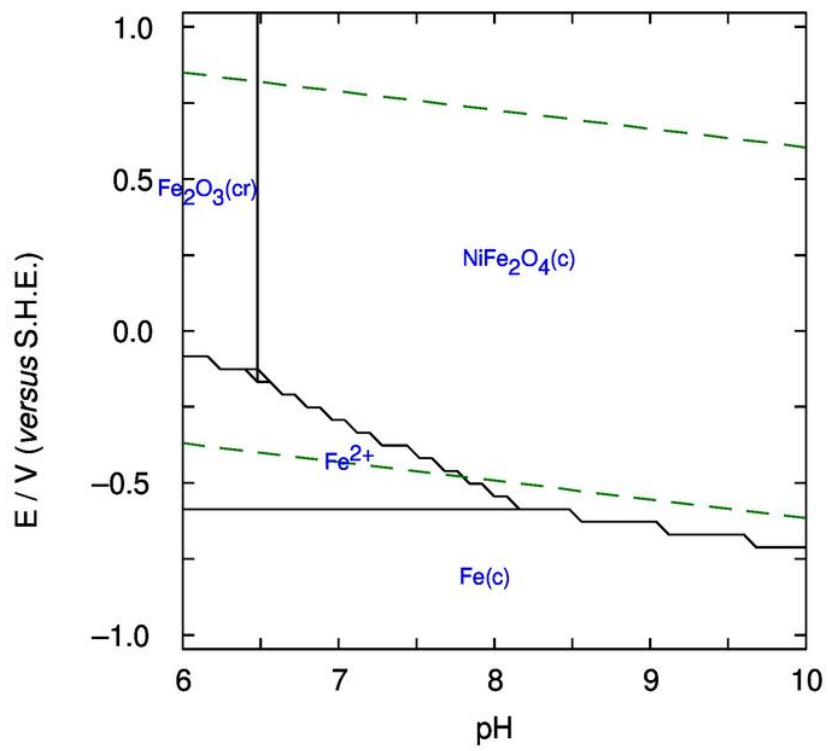

# NiMn

## Ni

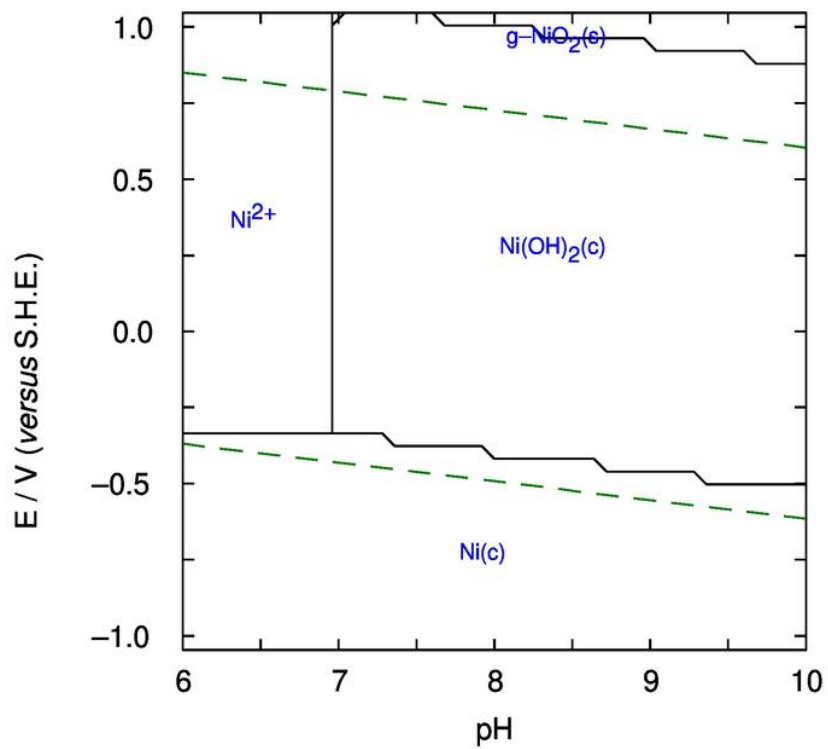

## Mn

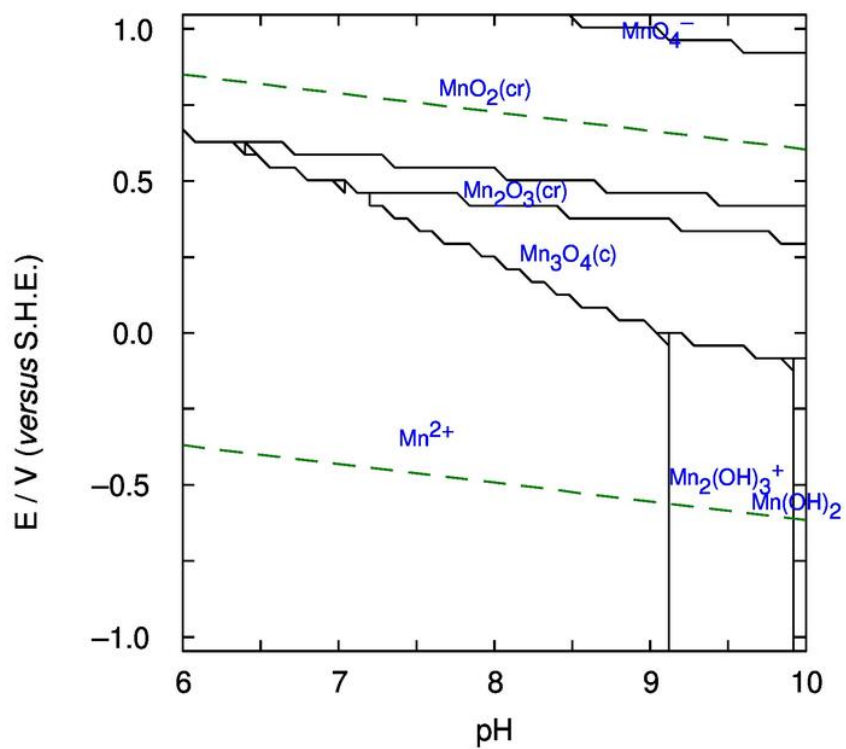

# NiRb

## Ni



## Rb



# NiS

## Ni

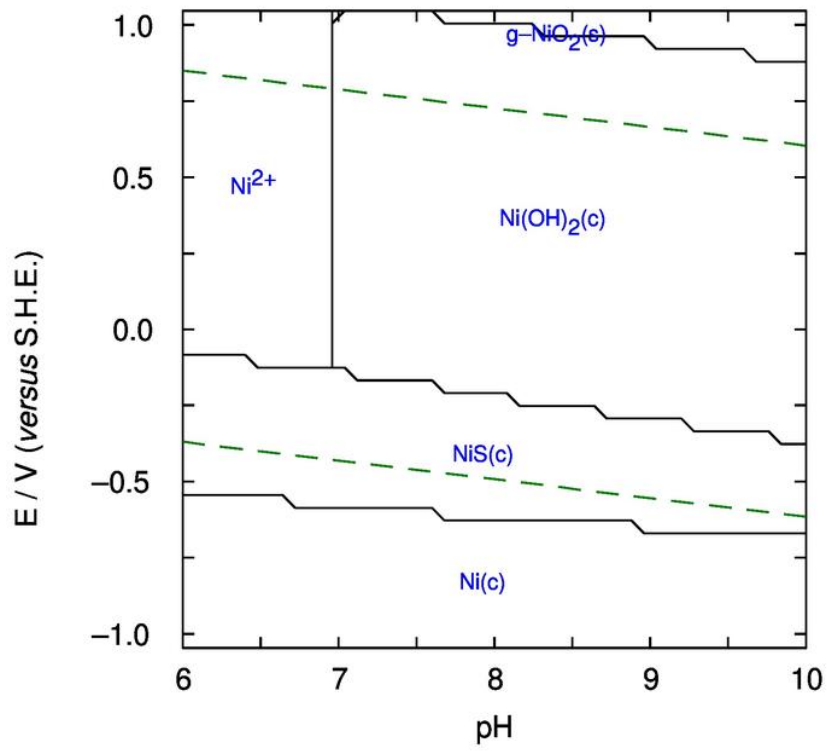

## S

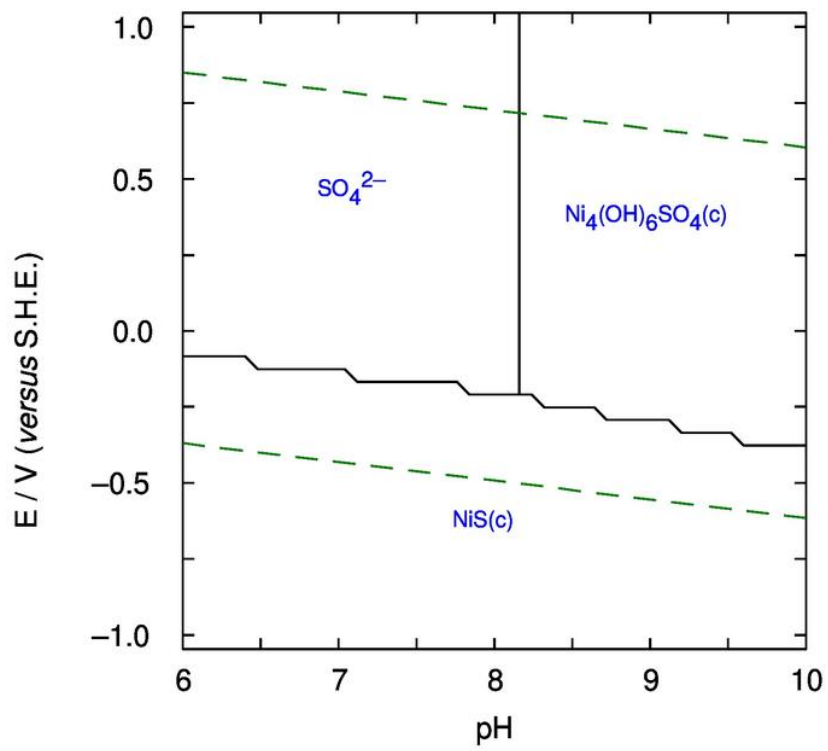

# NiSe

## Ni

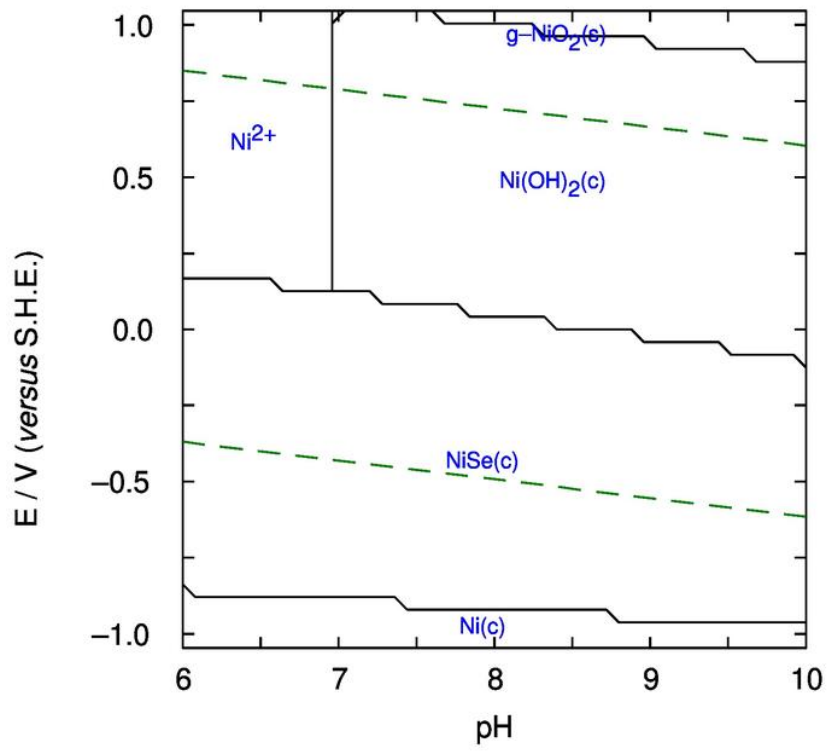

## Se

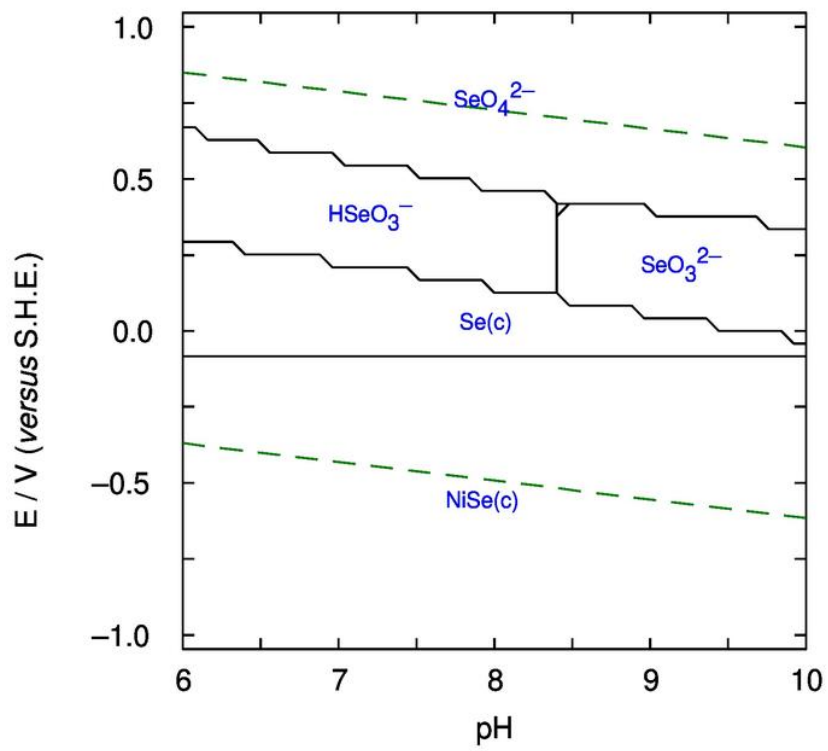

# NiY

## Ni



## Y



# NiZr

## Ni



## Zr





# PbAg

## Pb

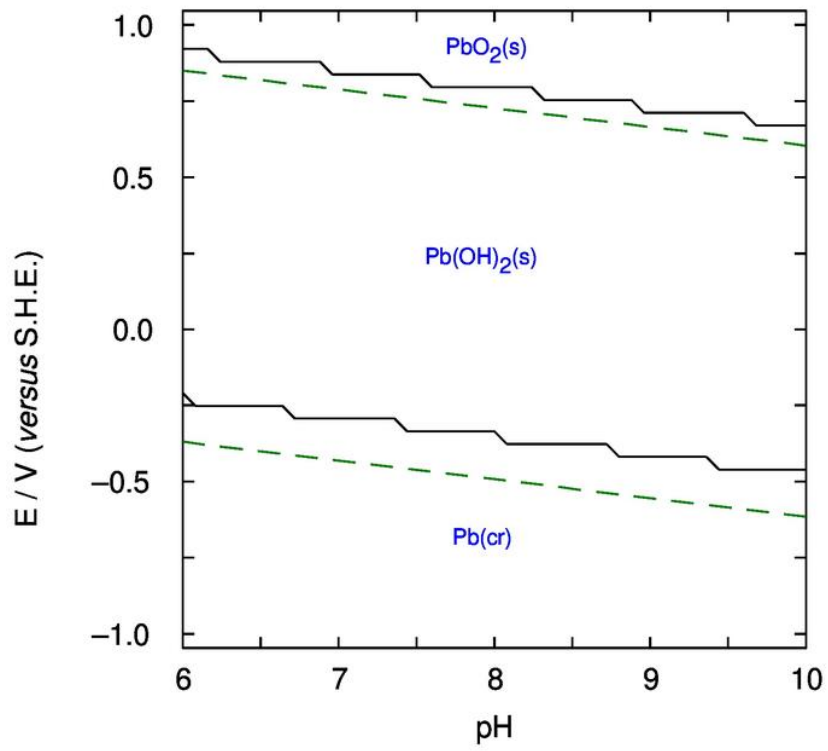

## Ag



# PbAl

## Pb



## Al



# PbAu

## Pb



## Au



# PbBa

## Pb

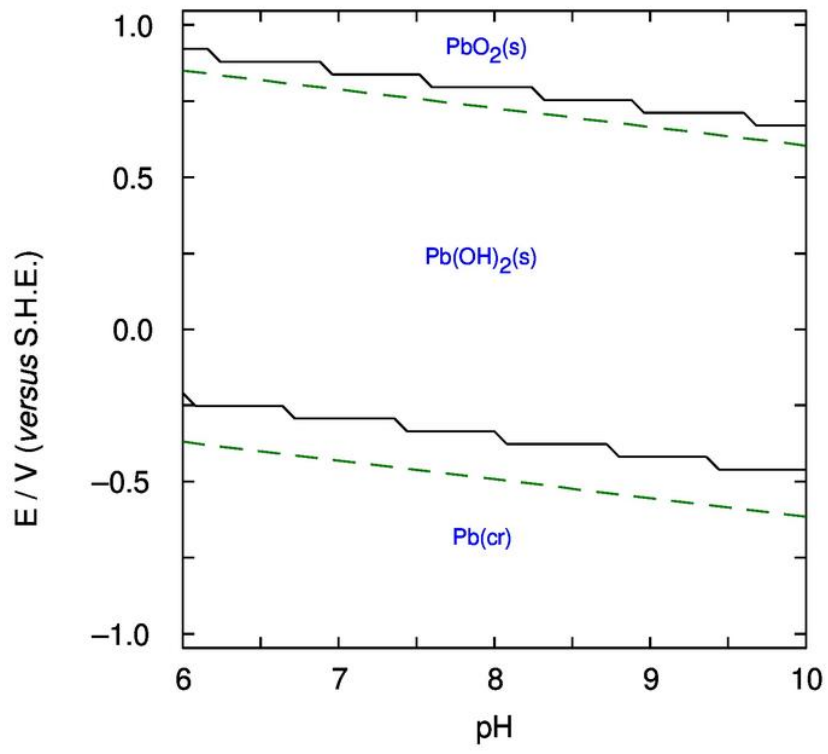

## Ba



# PbCd

## Pb



## Cd



# PbCe

## Pb



## Ce



# PbCo

## Pb



## Co



# PbCr

## Pb

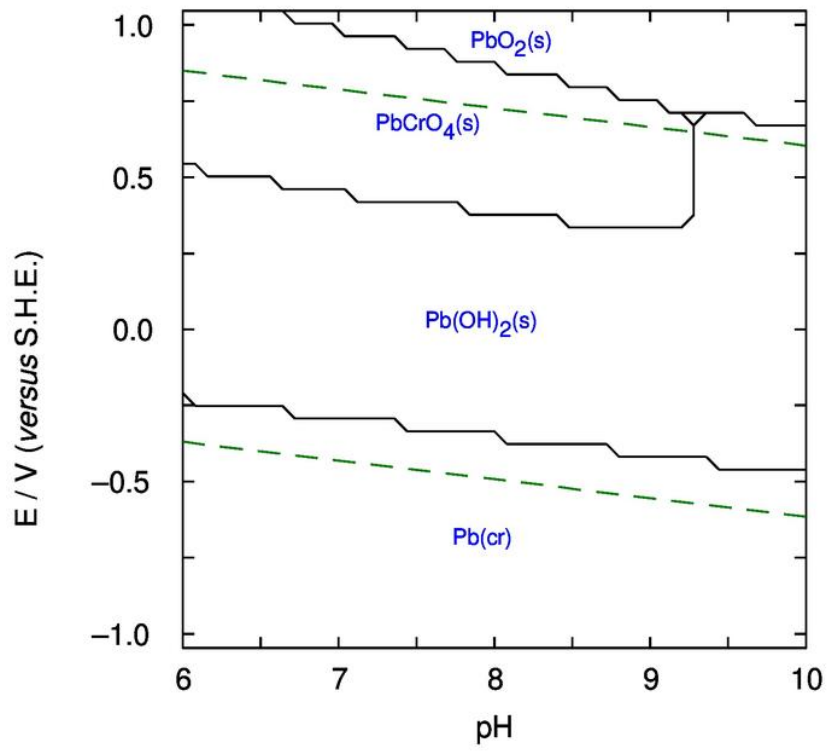

## Cr

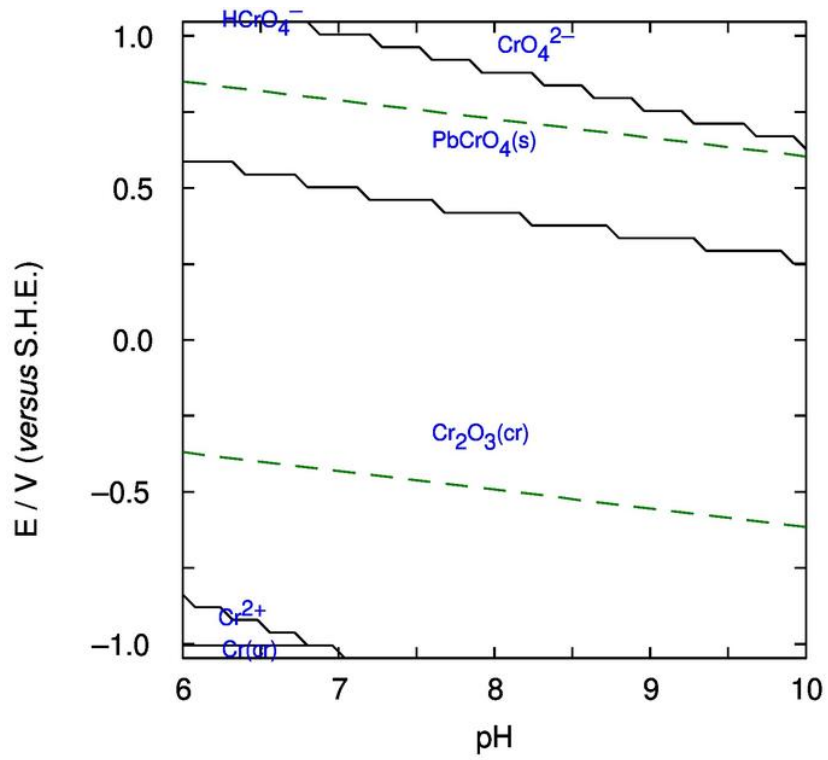



# PbCu

## Pb



## Cu



# PbEu

## Pb



## Eu

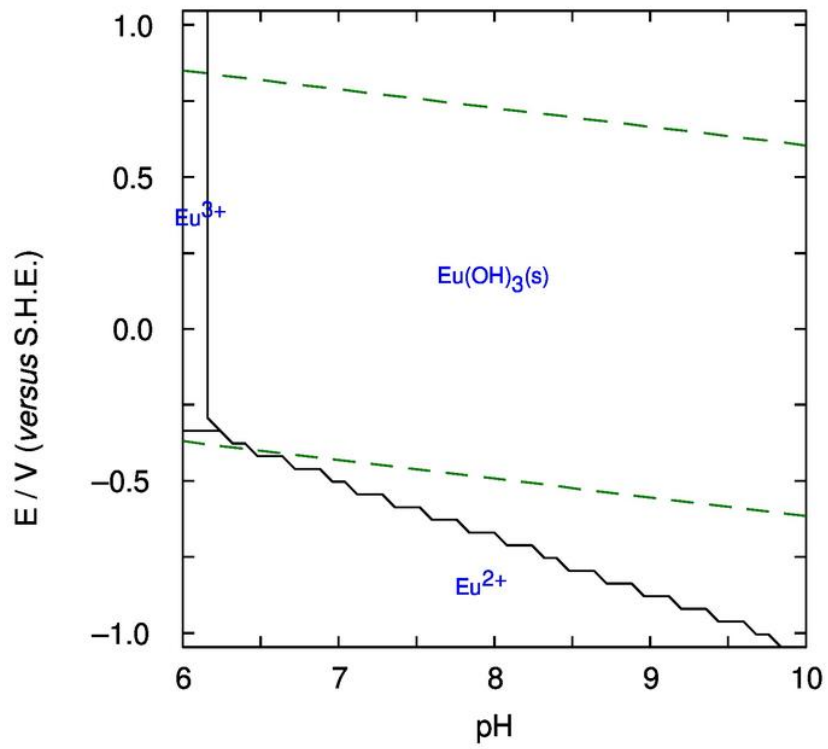

# PbFe

## Pb



## Fe



# PbGd

## Pb



## Gd



# PbHg

## Pb



## Hg



# PbIn

## Pb



## In



# PbLa

## Pb



## La



# PbMn

## Pb



## Mn





# PbMo

## Pb

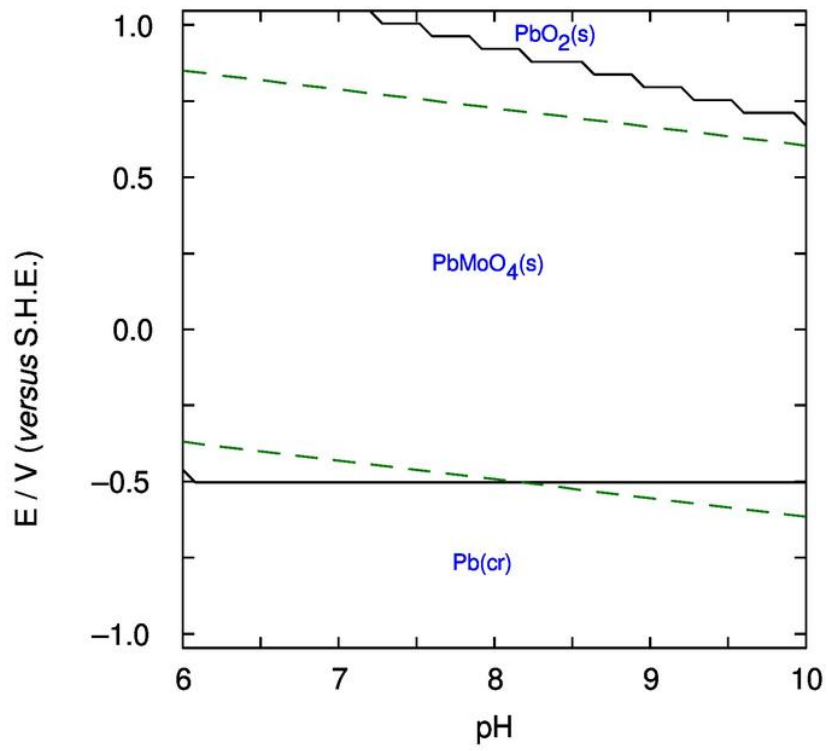

## Mo

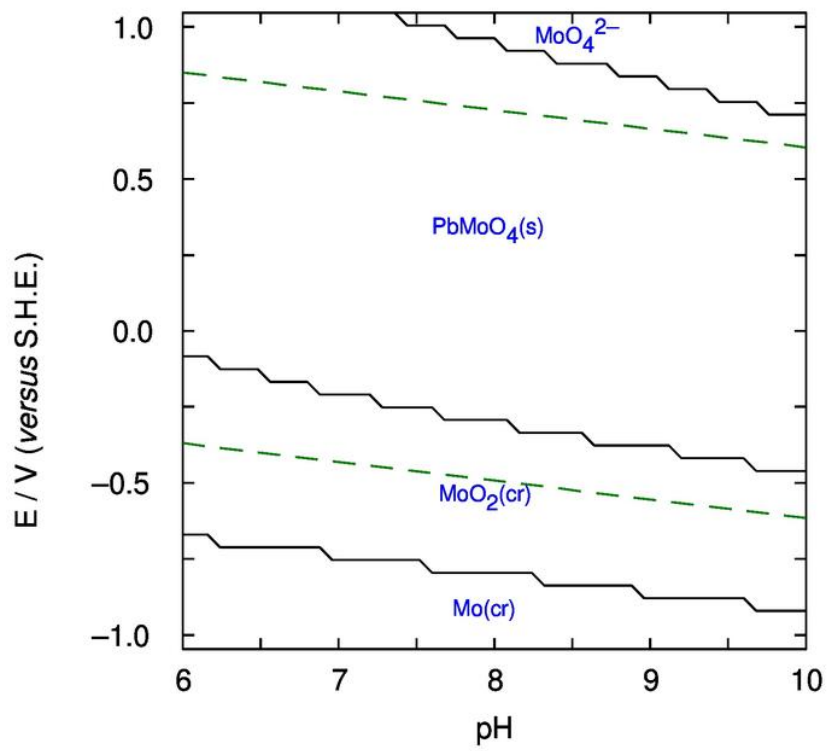

# PbNd

## Pb



## Nd

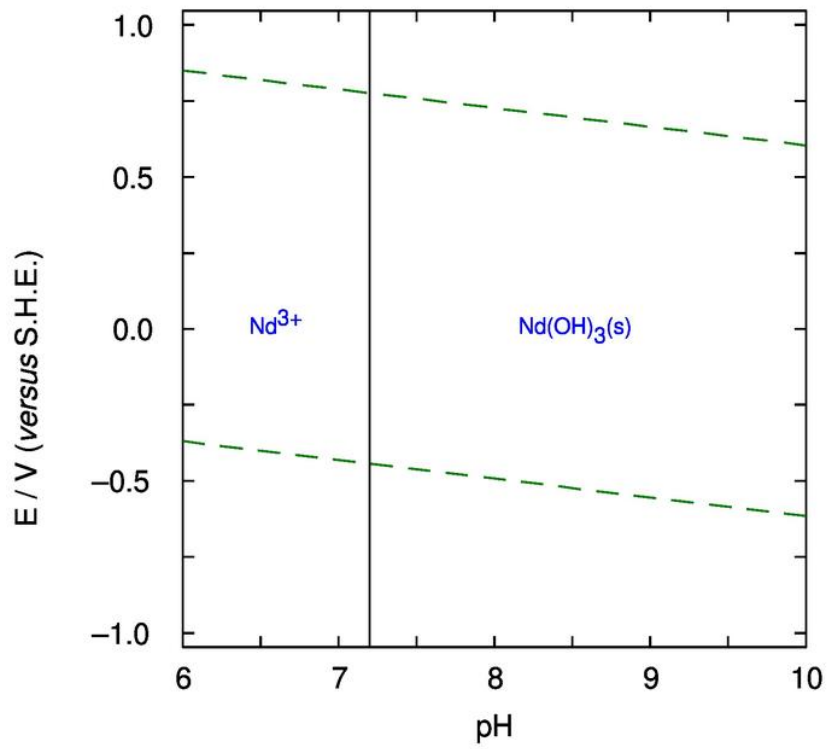

# PbNi

## Pb



## Ni



# PbPr

## Pb



## Pr



# PbRb

## Pb



## Rb



# PbS

## Pb

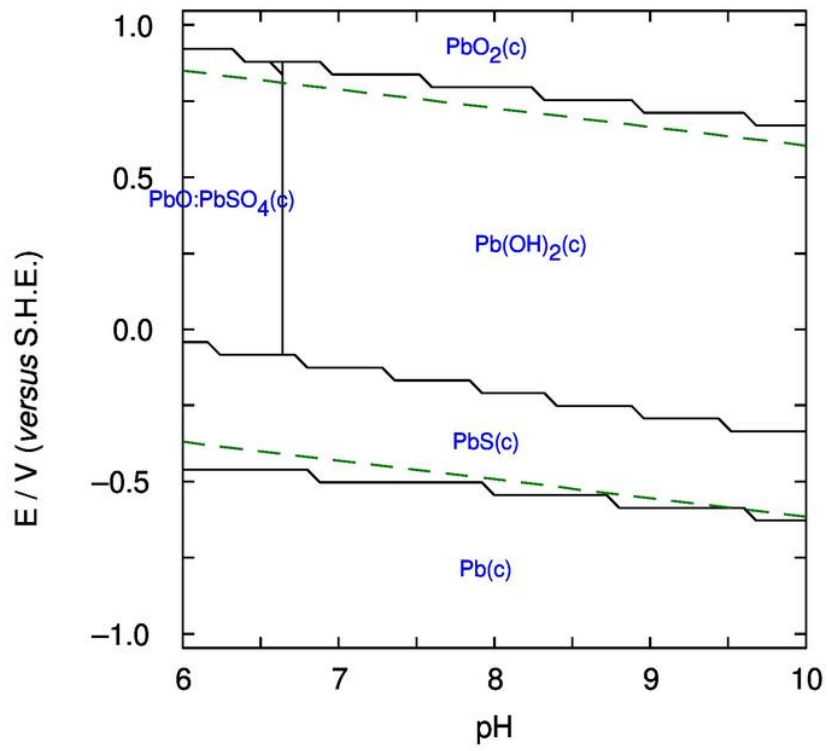

## S

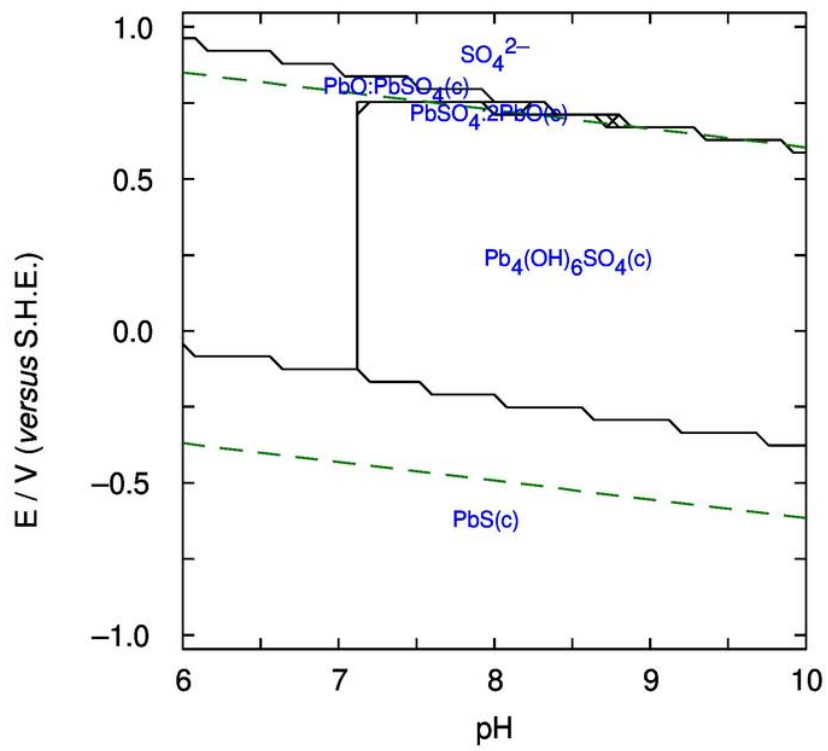

# PbSe

## Pb

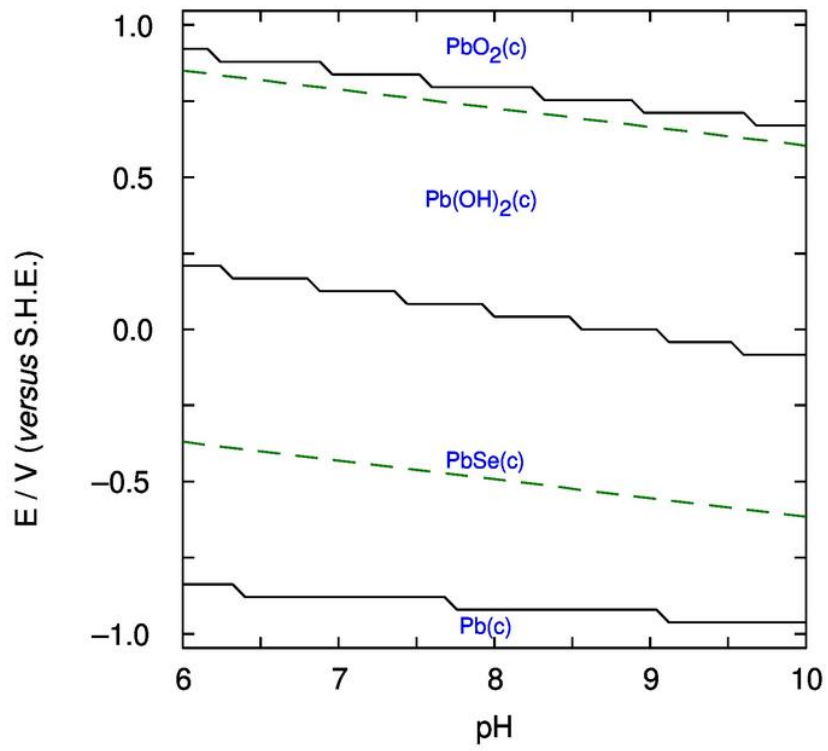

## Se

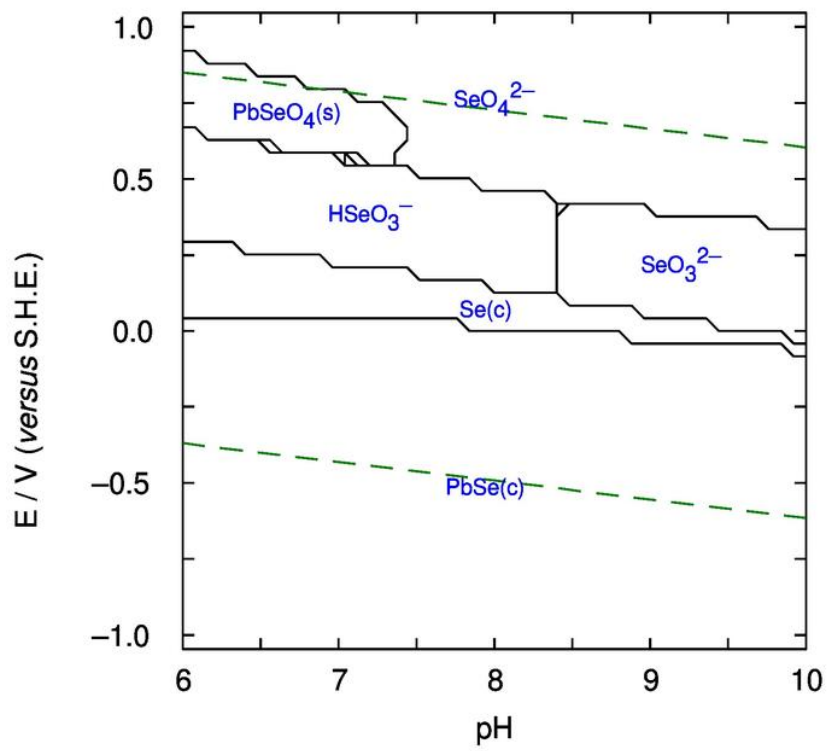

# PbSm

## Pb



## Sm





# PbSn

## Pb



## Sn



# PbSr

## Pb



## Sr



# PbTe

## Pb



## Te



# PbV

## Pb

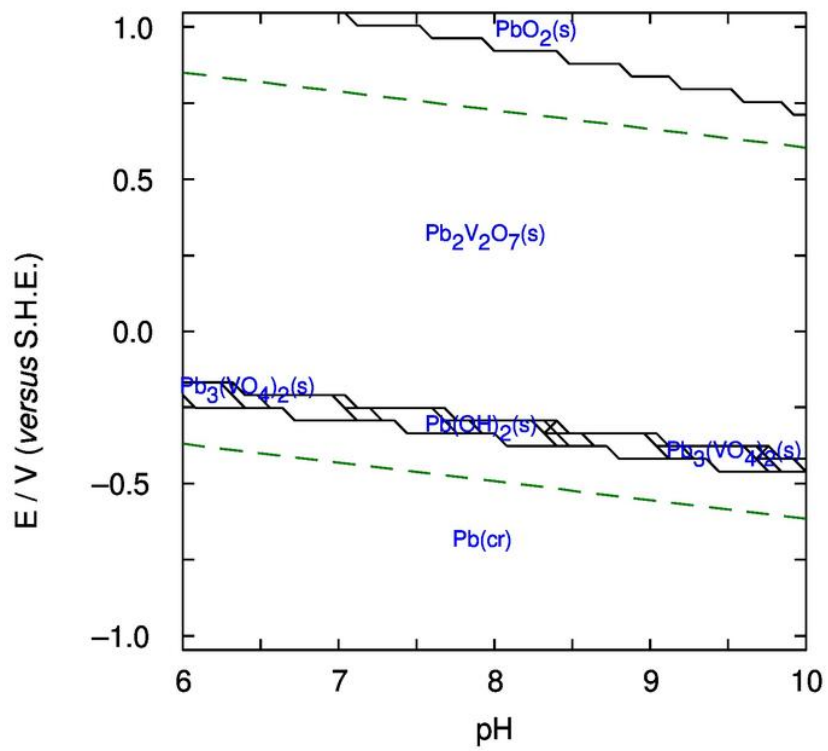

## V

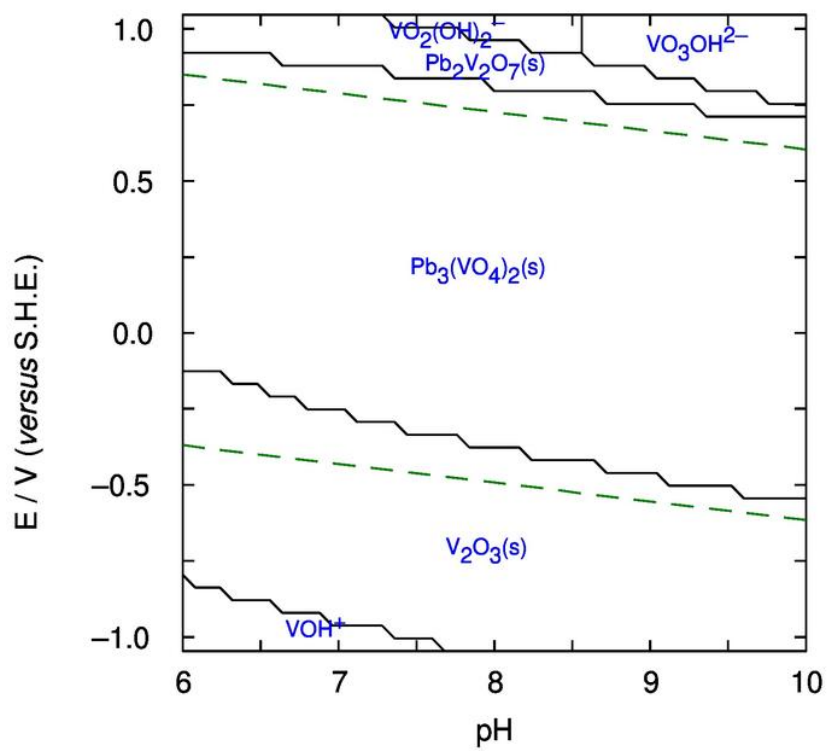

# PbW

## Pb

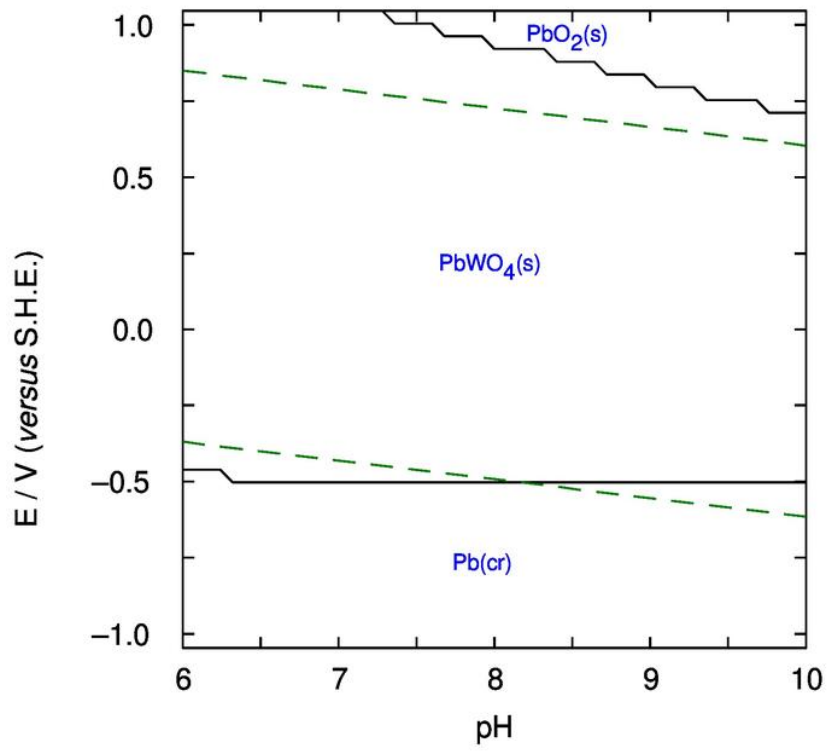

## W

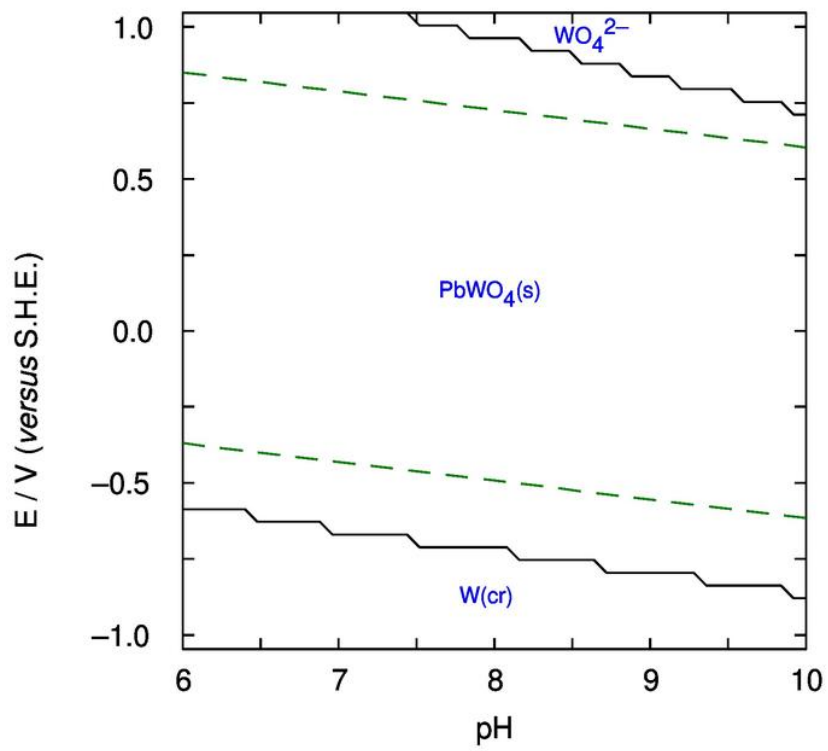

# PbY

## Pb



## Y



# PbZn

## Pb



## Zn



# PbZr

## Pb



## Zr





# PrAg

## Pr

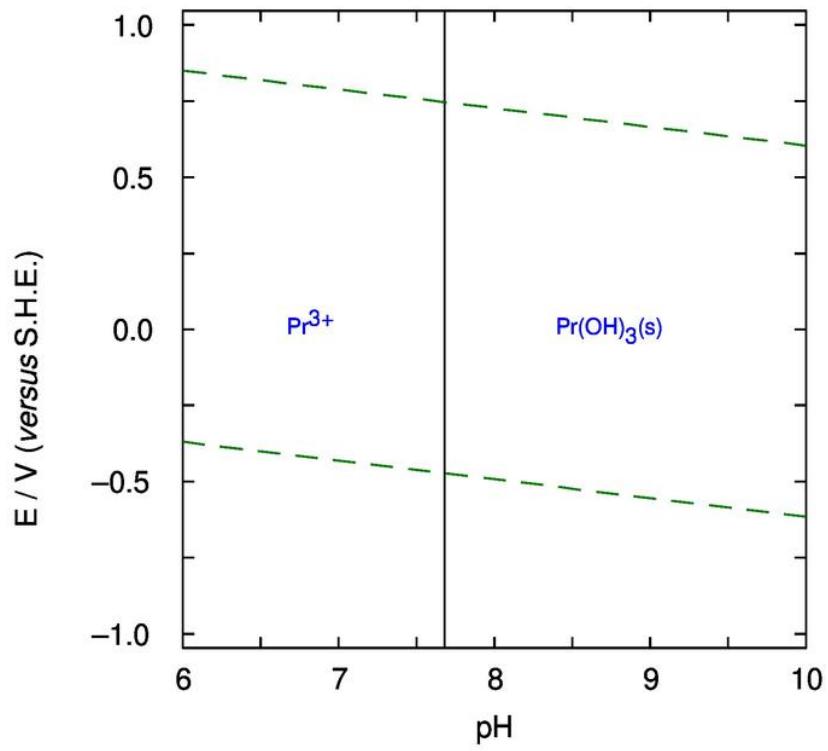

## Ag



# PrAl

## Pr

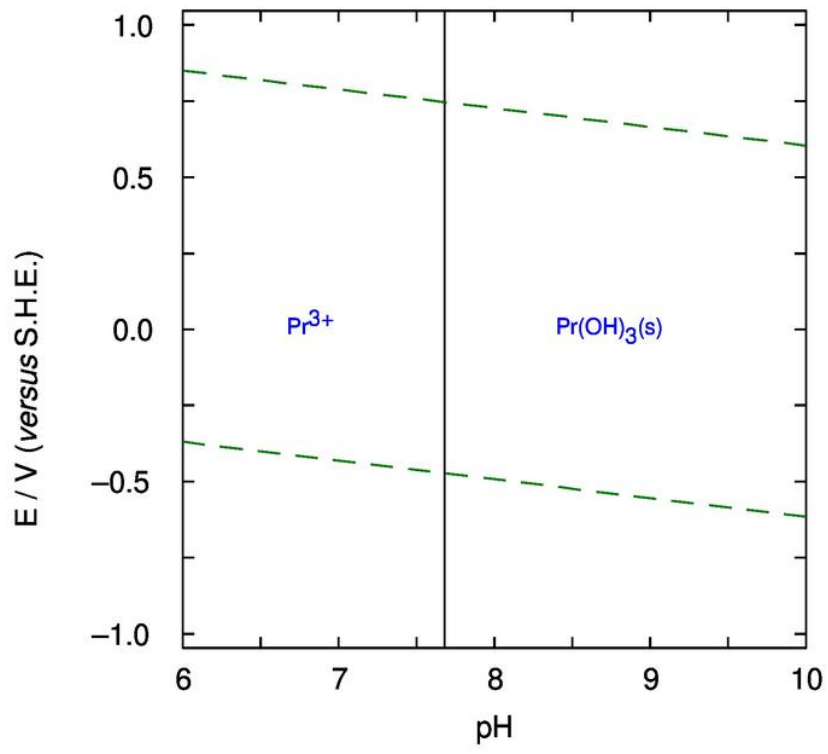

## Al



# PrBa

## Pr



## Ba



# PrCd

## Pr

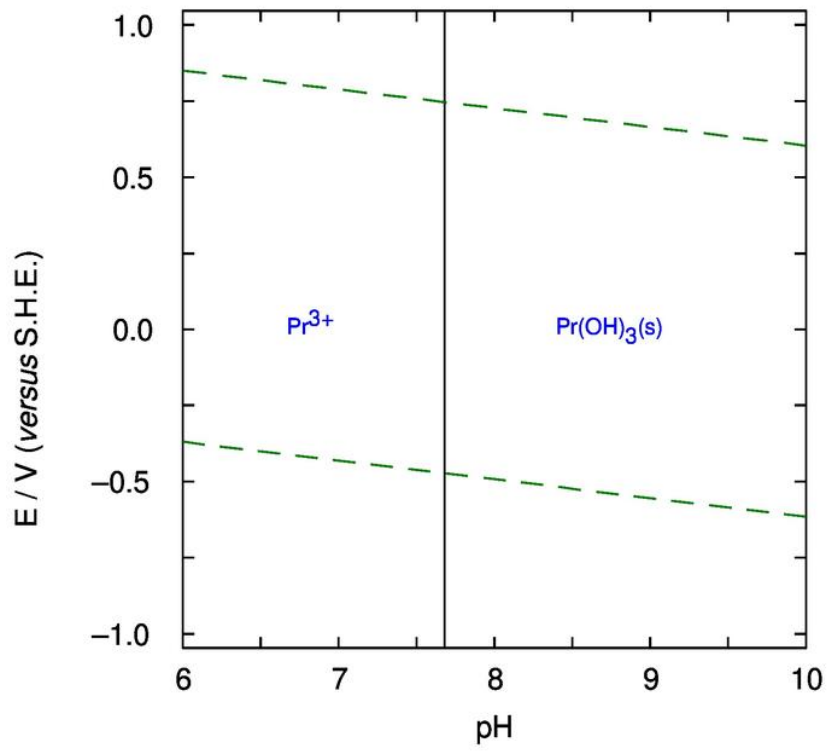

## Cd

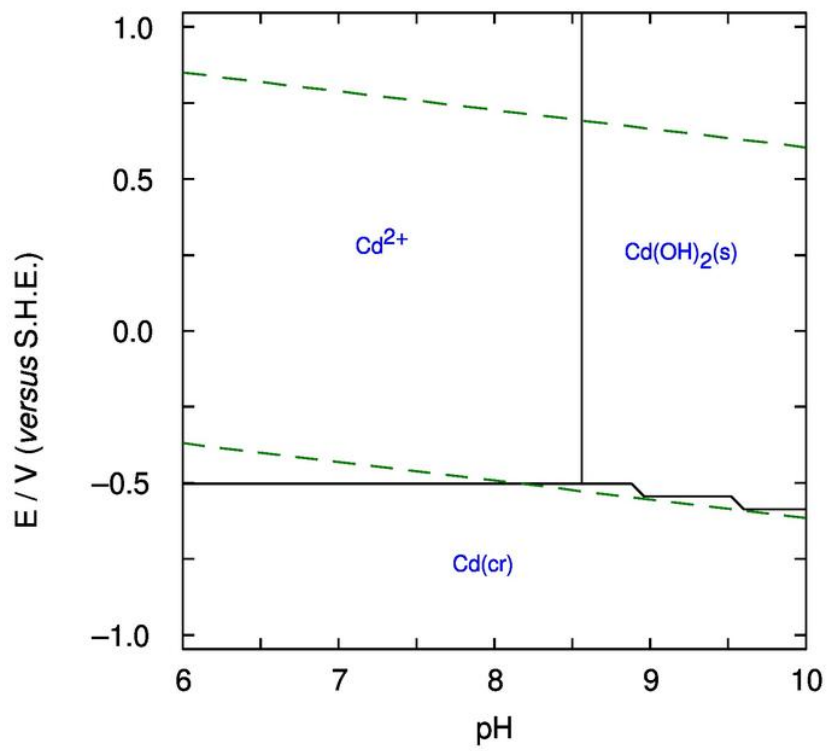

# PrCe

## Pr



## Ce



# PrCo

## Pr



## Co



# PrCr

## Pr

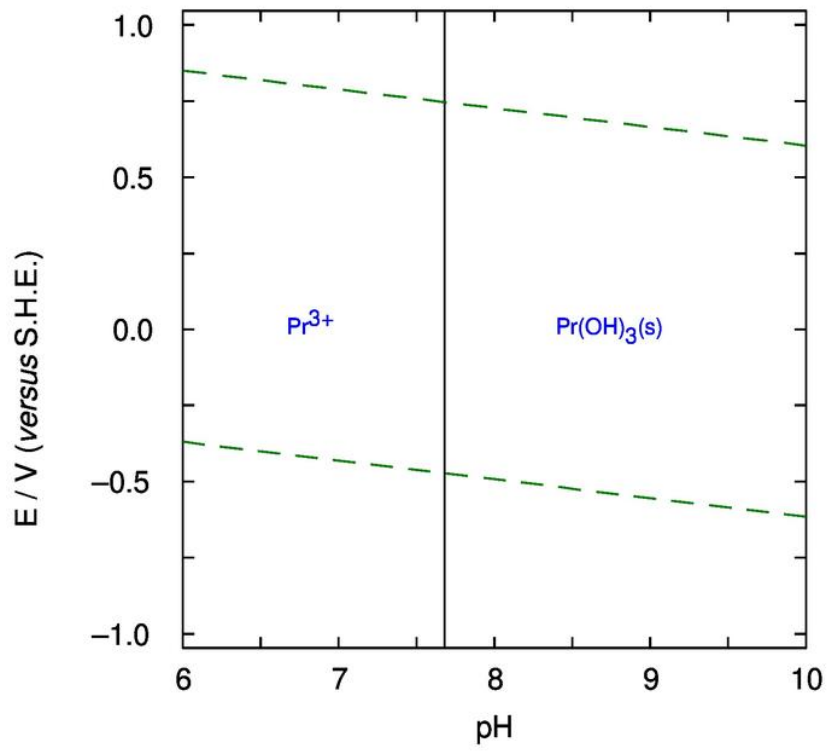

## Cr

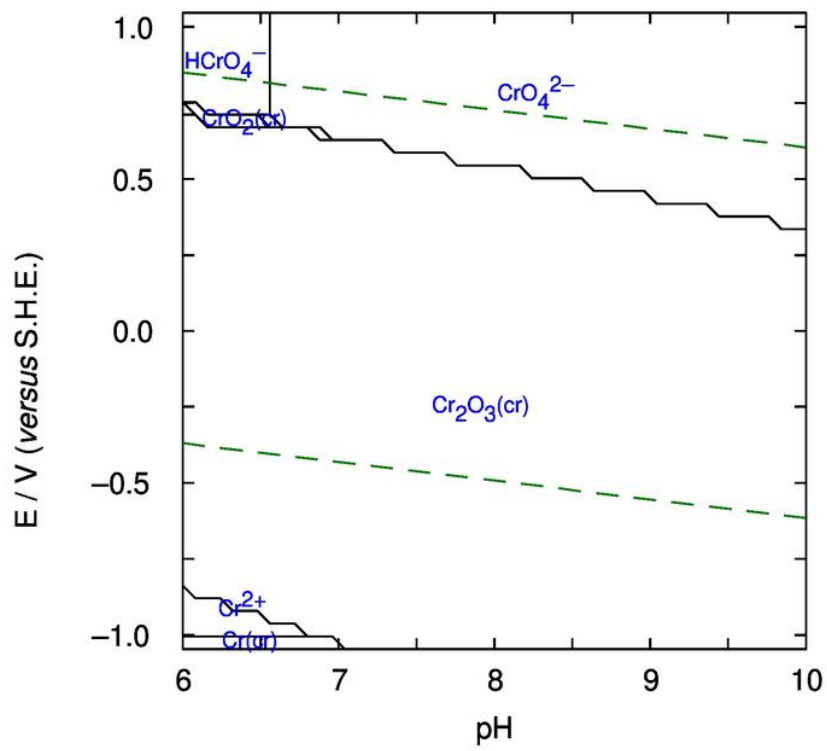

# PrCu

## Pr



## Cu





# PrFe

## Pr



## Fe



# PrIn

## Pr



## In



# PrLa

## Pr

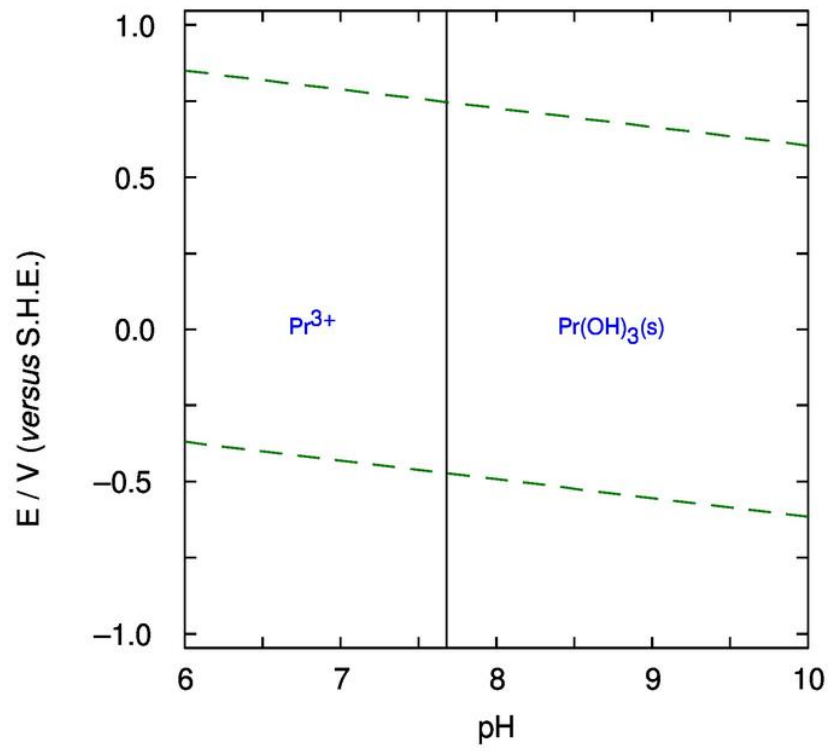

## La

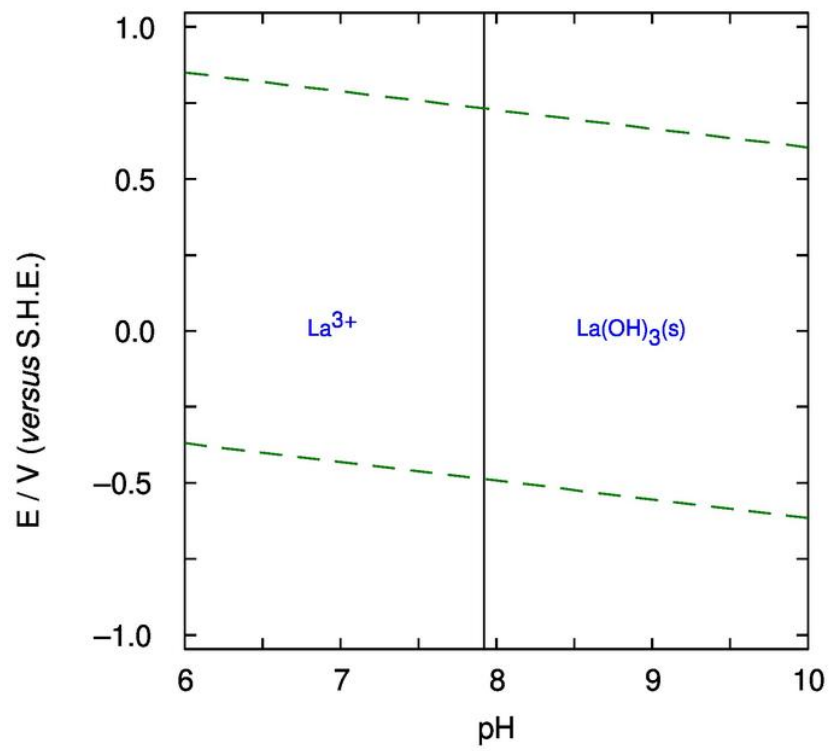

# PrMn

## Pr



## Mn



# PrMo

## Pr



## Mo



# PrNi

## Pr



## Ni



# PrRb

## Pr



## Rb



# PrS

## Pr

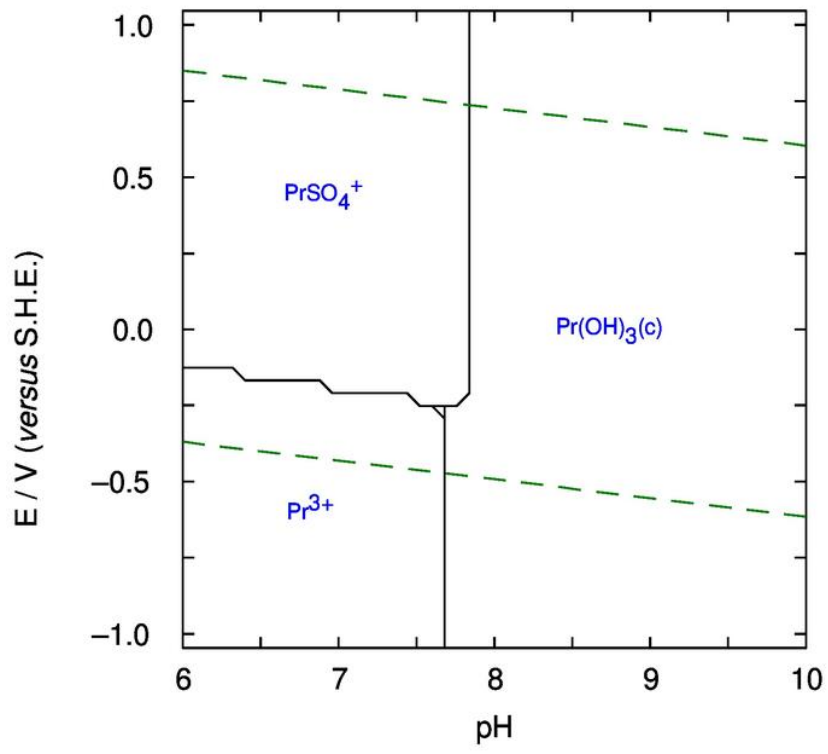

## S

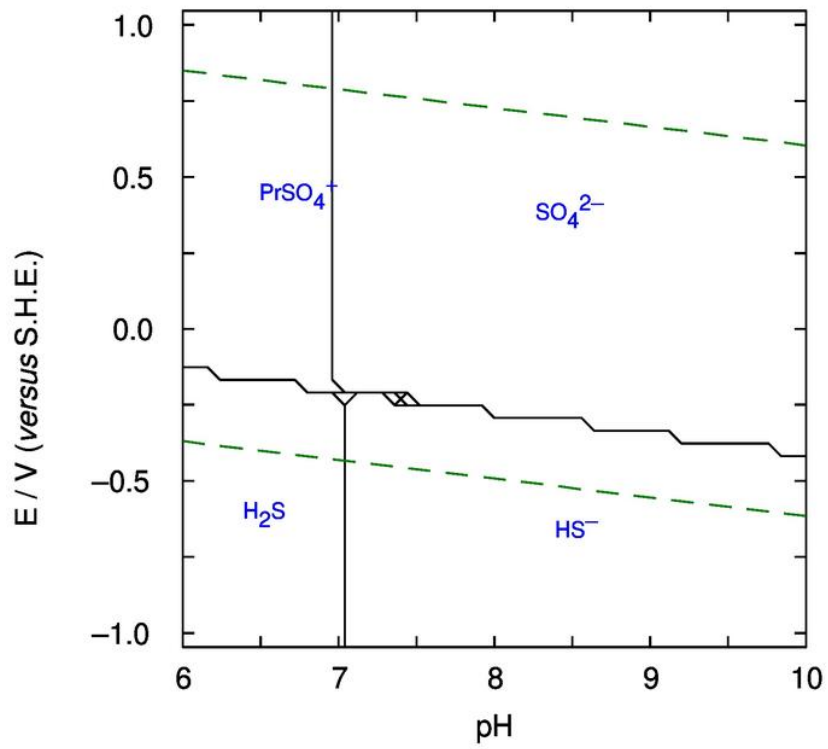



# PrSe

## Pr



## Se



# PrSn

## Pr



## Sn



# PrSr

## Pr



## Sr



# PrTe

## Pr



## Te



# PrV

## Pr



## V



# PrY

## Pr



## Y



# PrZn

## Pr



## Zn



# PrZr

## Pr



## Zr

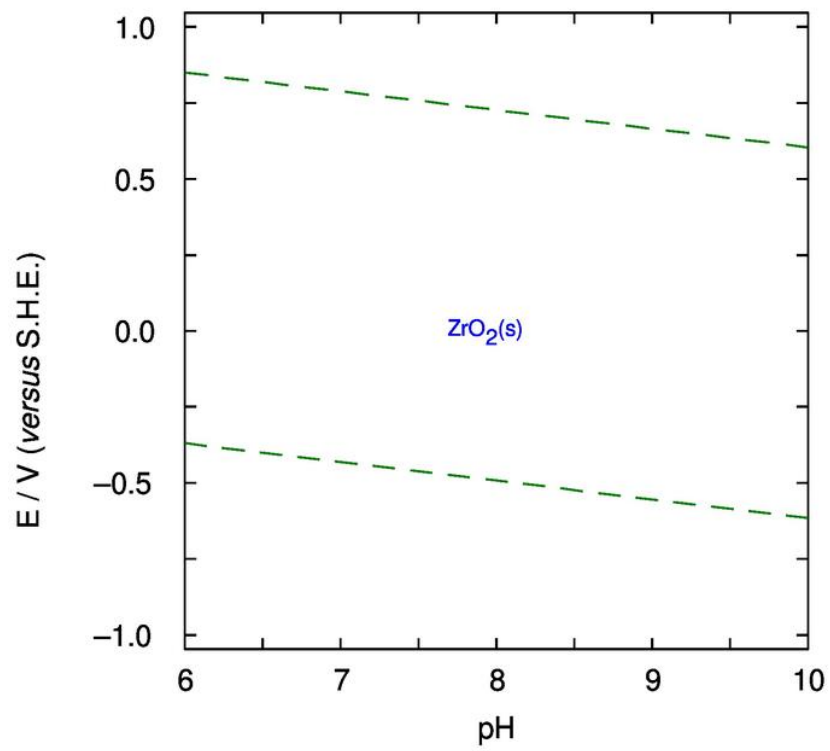



# RbAg

## Rb

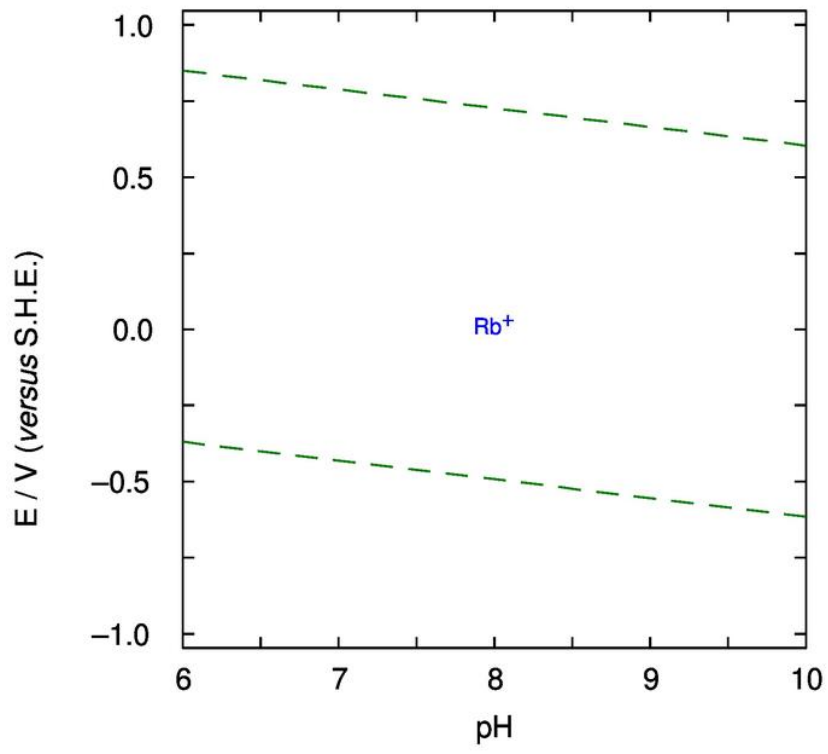

## Ag



# RbCr

## Rb

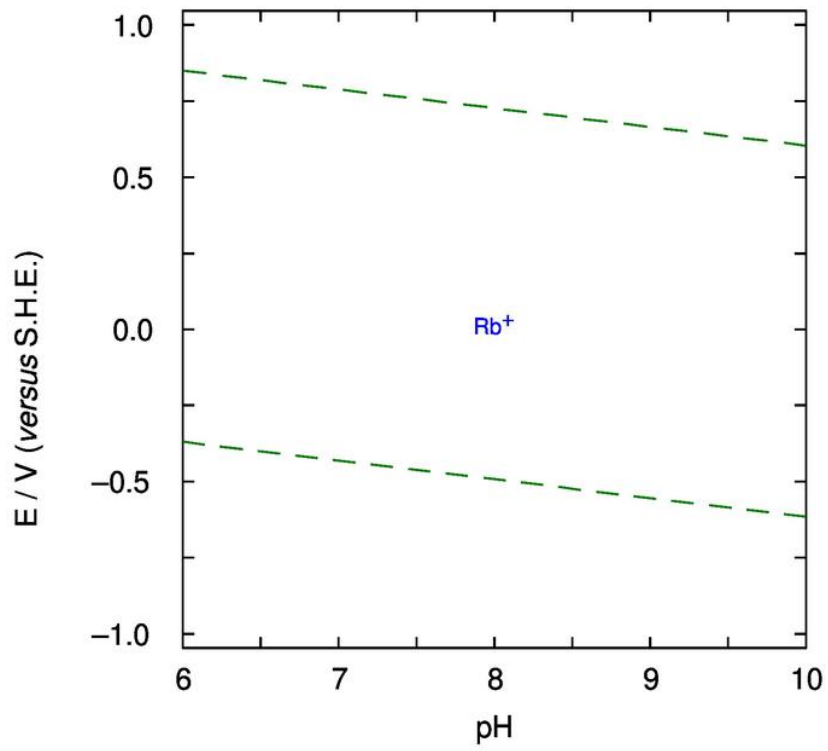

## Cr



# RbMo

## Rb



## Mo



# RbS

## Rb



## S



# RbSr

## Rb



## Sr

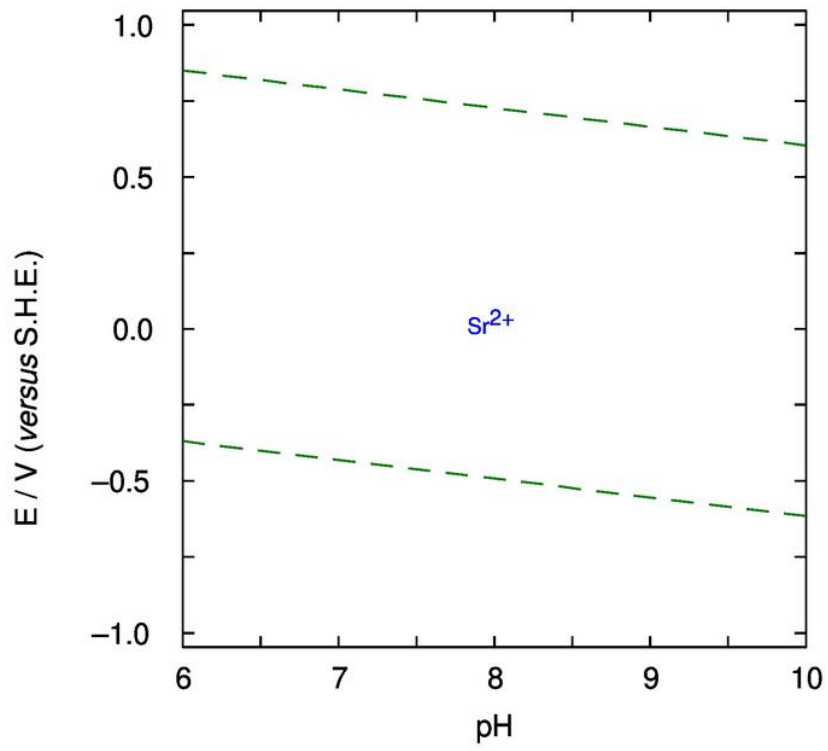

# RbY

## Rb



## Y



# RbZr

## Rb



## Zr



# SeRb

## Se

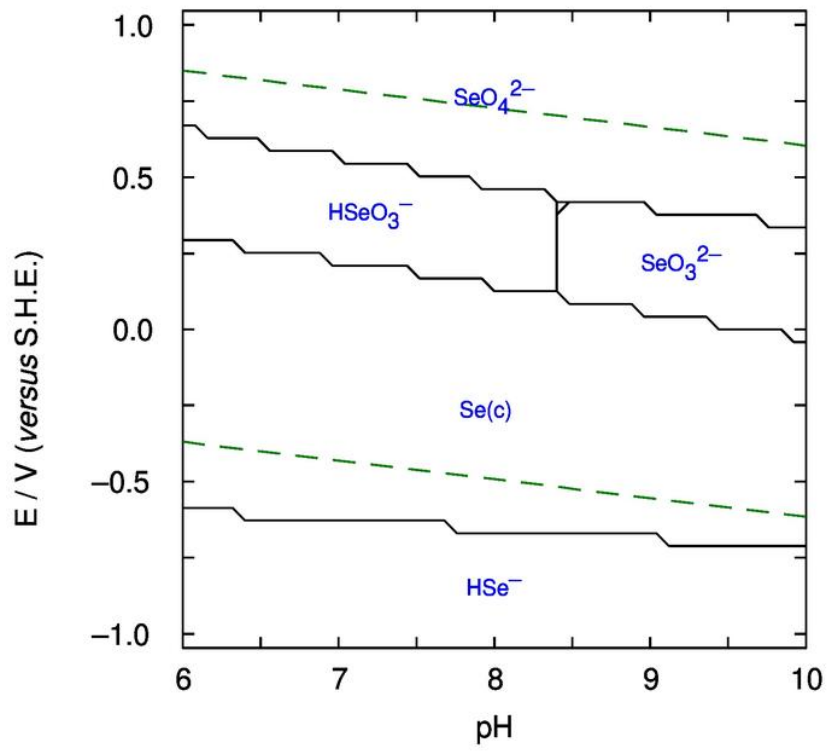

## Rb





# SeS

## Se



## S



# SeY

## Se



## Y



# SmAg

## Sm

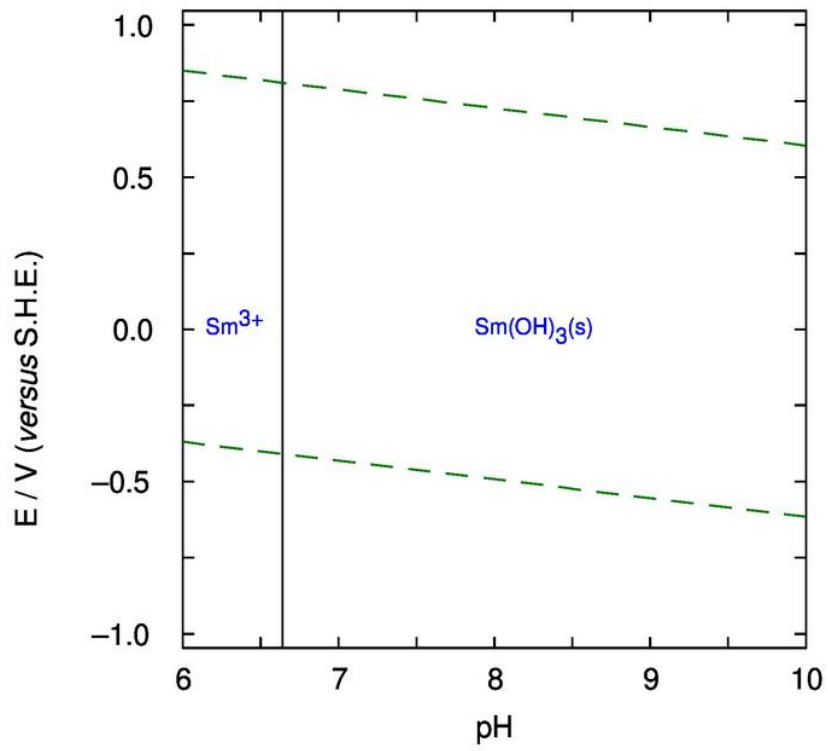

## Ag



# SmAl

## Sm

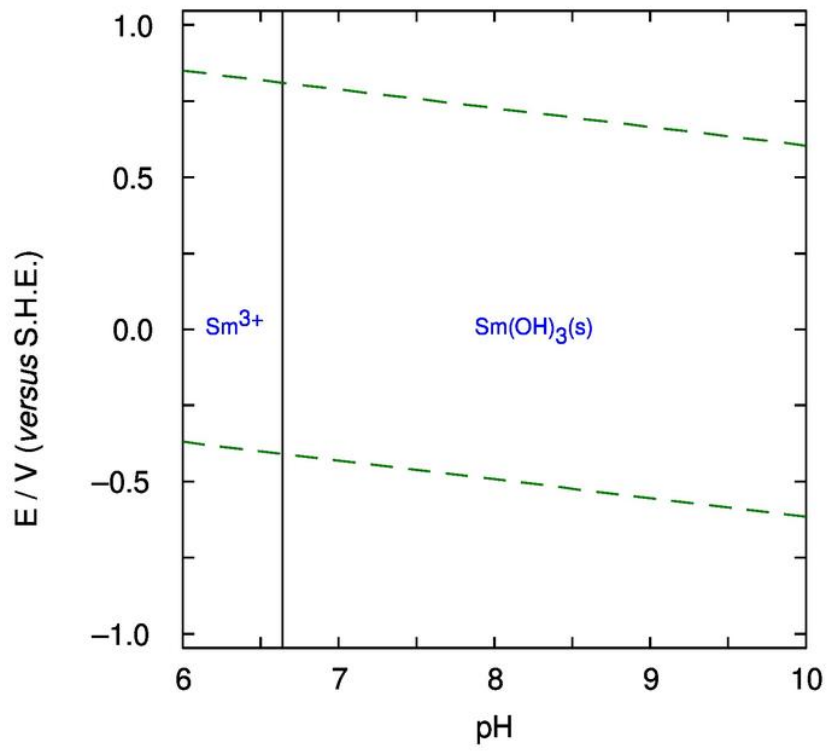

## Al



# SmBa

## Sm



## Ba



# SmCd

## Sm



## Cd



# SmCe

## Sm



## Ce



# SmCo

## Sm



## Co





# SmCr

## Sm



## Cr



# SmCu

## Sm



## Cu



# SmFe

## Sm



## Fe



# SmIn

## Sm



## In



# SmLa

## Sm



## La



# SmMn

## Sm



## Mn



# SmMo

## Sm



## Mo



# SmNd

## Sm



## Nd





# SmNi

## Sm



## Ni



# SmPr

## Sm



## Pr



# SmRb

## Sm



## Rb



# SmS

## Sm

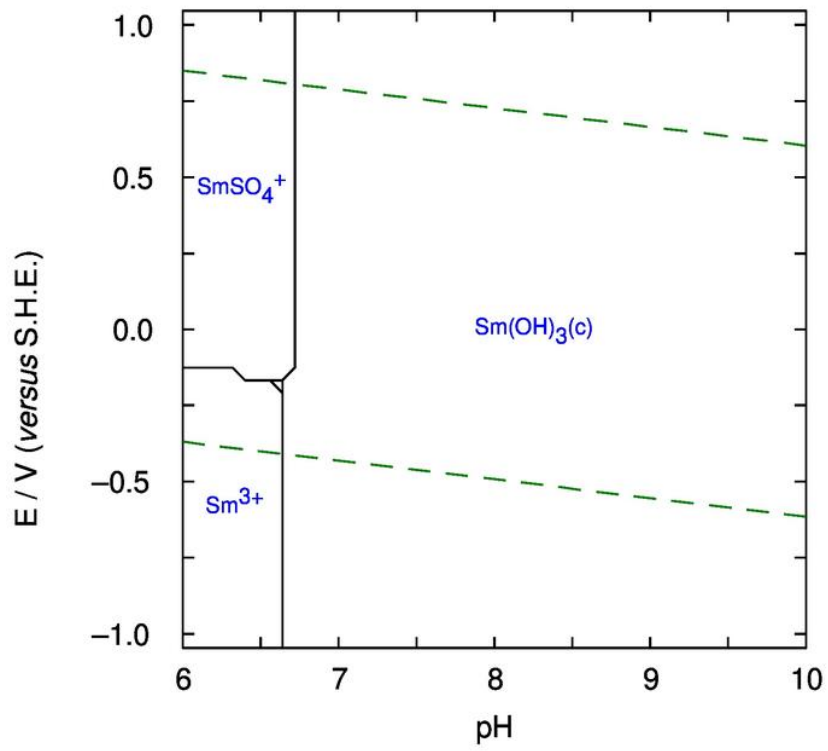

## S

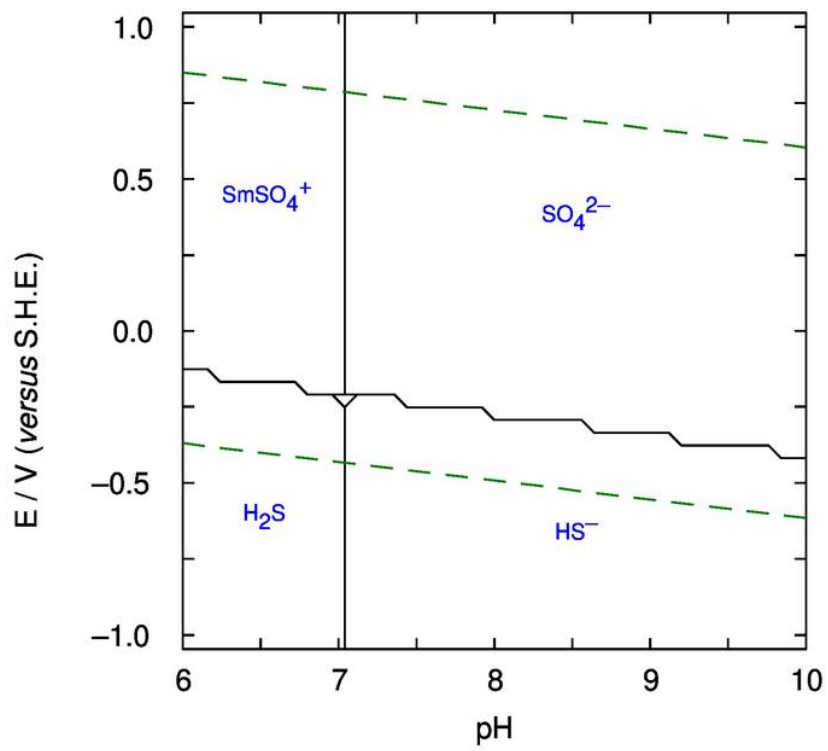

# SmSe

## Sm

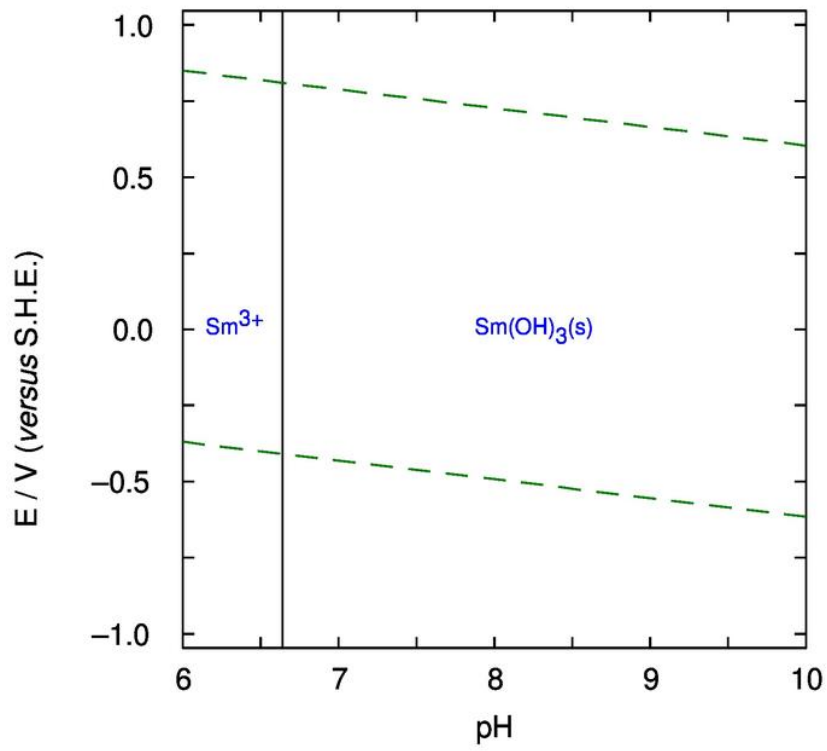

## Se

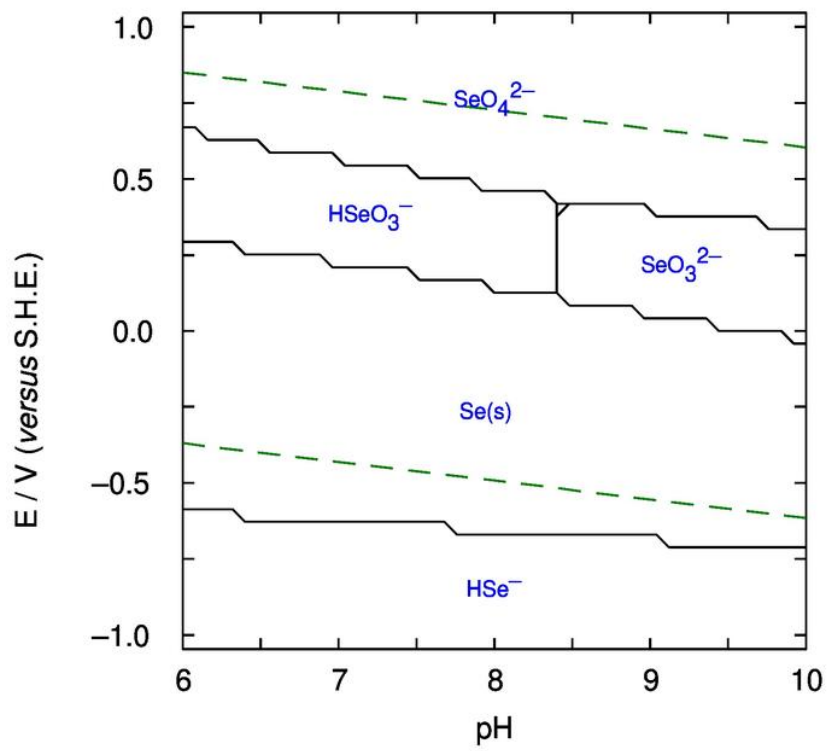

# SmSn

## Sm



## Sn



# SmSr

## Sm



## Sr



# SmTe

## Sm



## Te





# SmV

## Sm



## V



# SmY

## Sm



## Y



# SmZn

## Sm



## Zn



# SmZr

## Sm



## Zr



# SnAg

## Sn

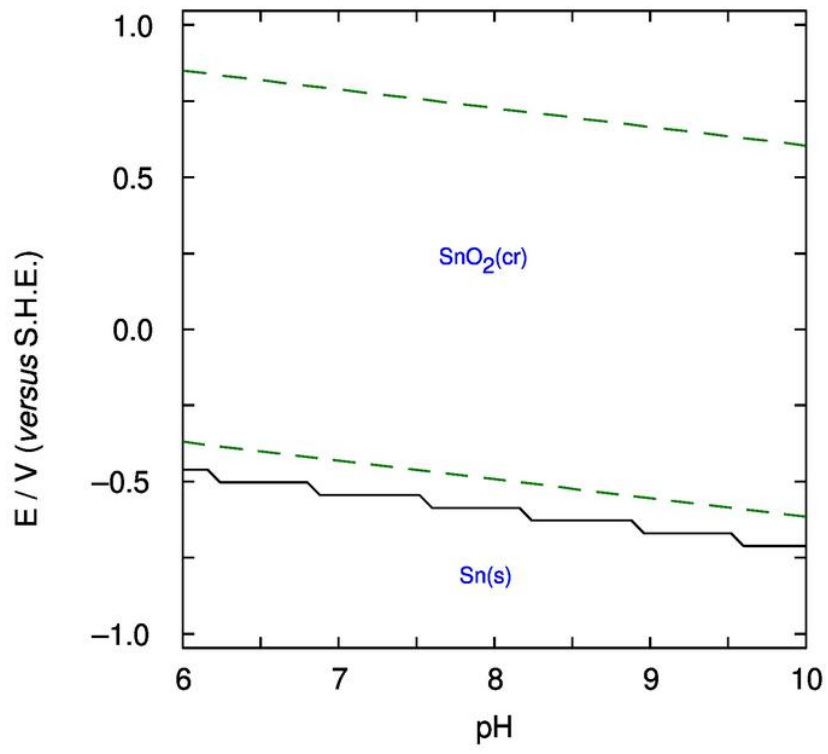

## Ag



# SnAl

## Sn



## Al



# SnCd

## Sn



## Cd



# SnCo

## Sn

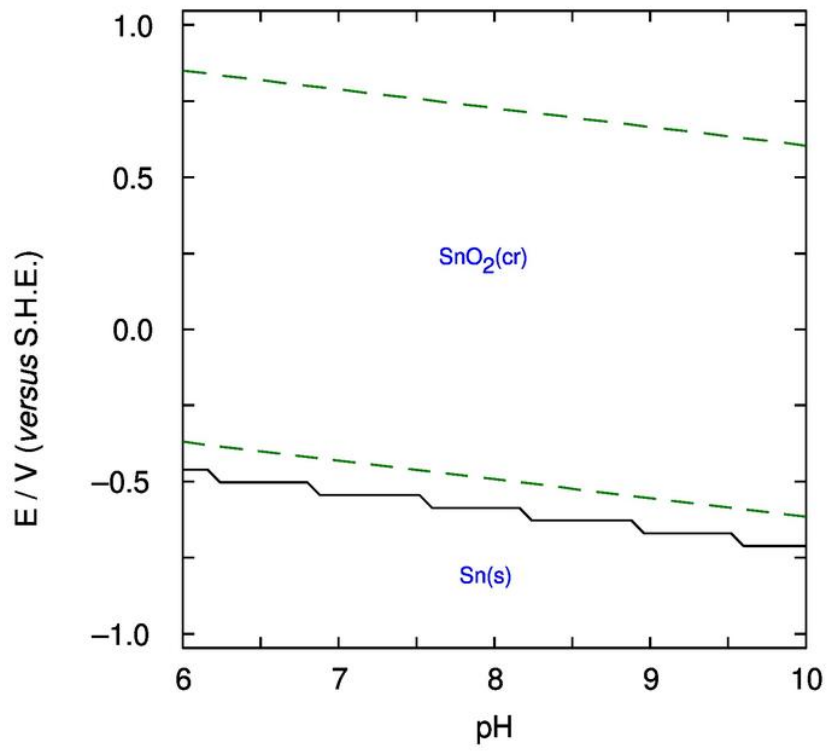

## Co





# SnCr

## Sn



## Cr



# SnCu

## Sn



## Cu



# SnFe

## Sn



## Fe



# SnIn

## Sn



## In



# SnMn

## Sn



## Mn



# SnMo

## Sn



## Mo



# SnNi

## Sn



## Ni



# SnRb

## Sn



## Rb





# SnS

## Sn



## S



# SnSe

## Sn



## Se



# SnSr

## Sn



## Sr



# SnV

## Sn



## V



# SnY

## Sn

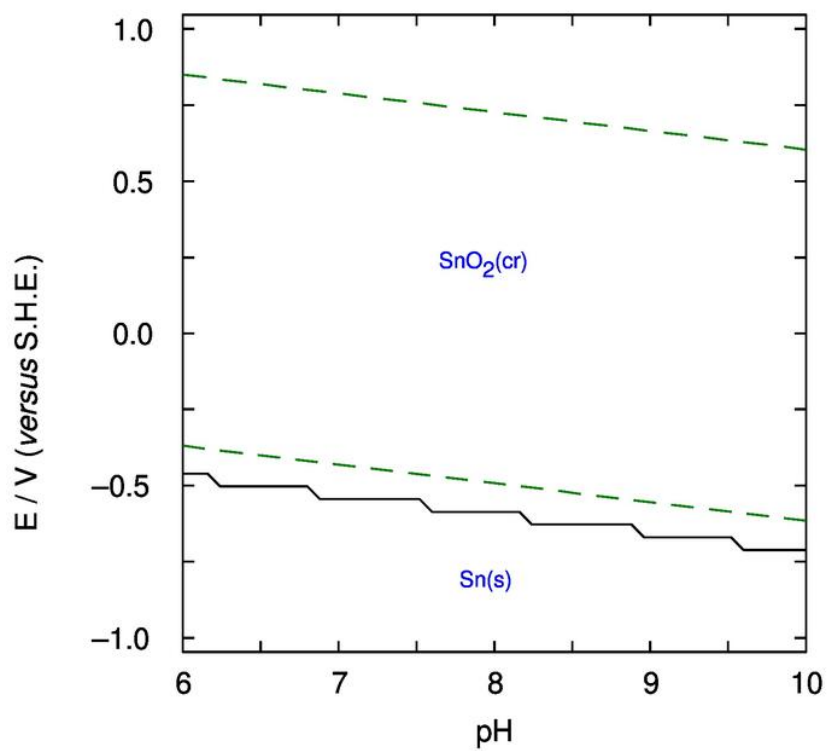

## Y

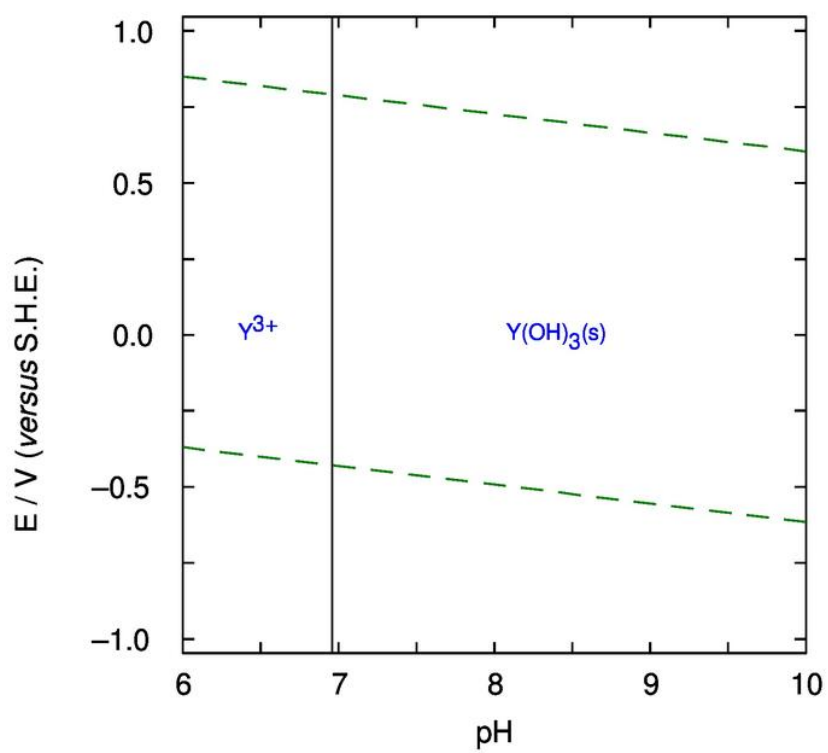

# SnZn

## Sn



## Zn



# SnZr

## Sn



## Zr



# SrCo

## Sr

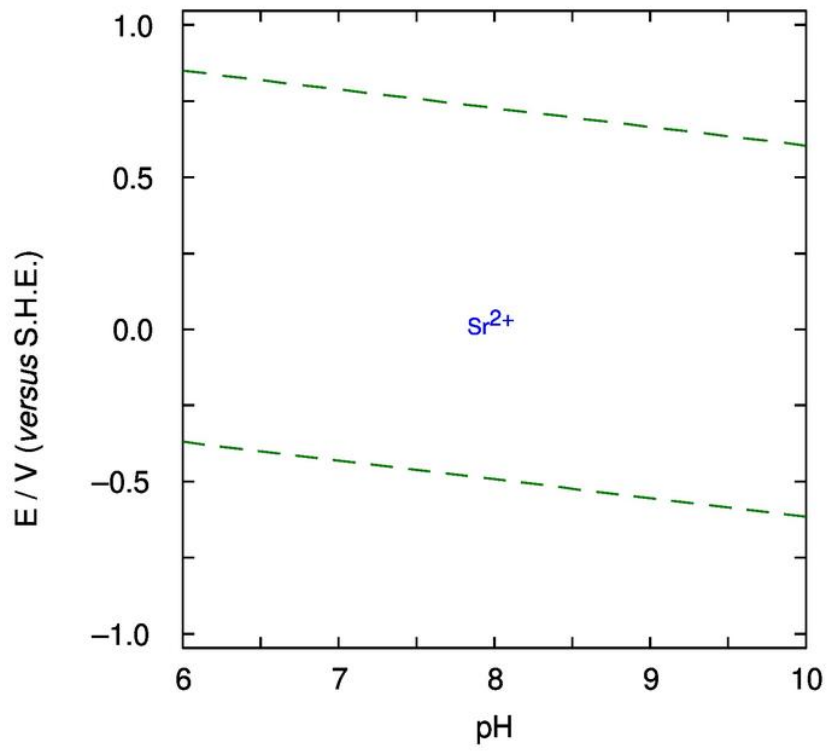

## Co





# SrCu

## Sr



## Cu



# SrFe

## Sr

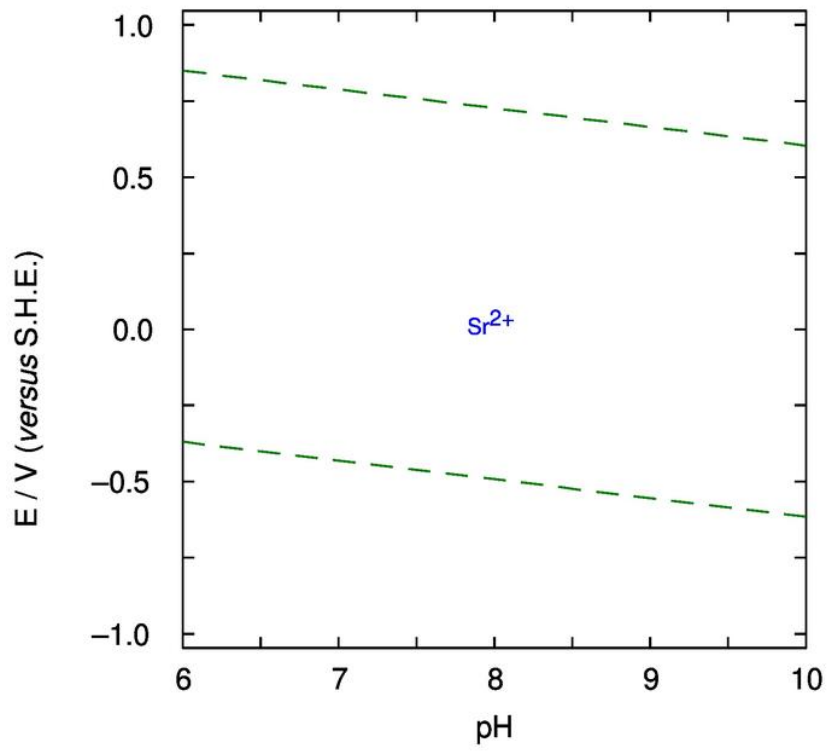

## Fe



# SrMn

## Sr



## Mn



# SrMo

## Sr



## Mo

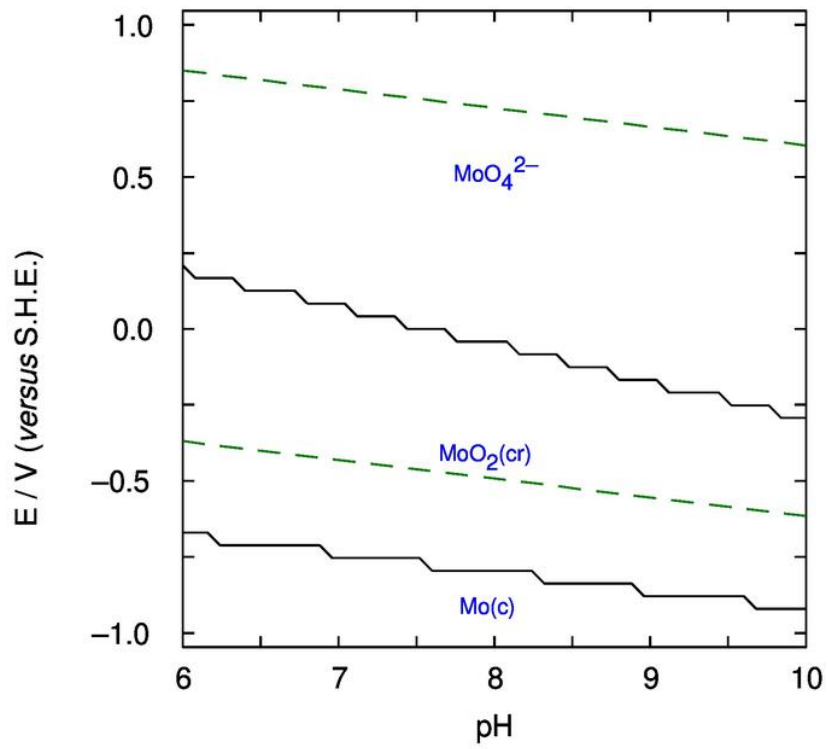

# SrNi

## Sr



## Ni



# SrS

## Sr



## S



# SrSe

## Sr

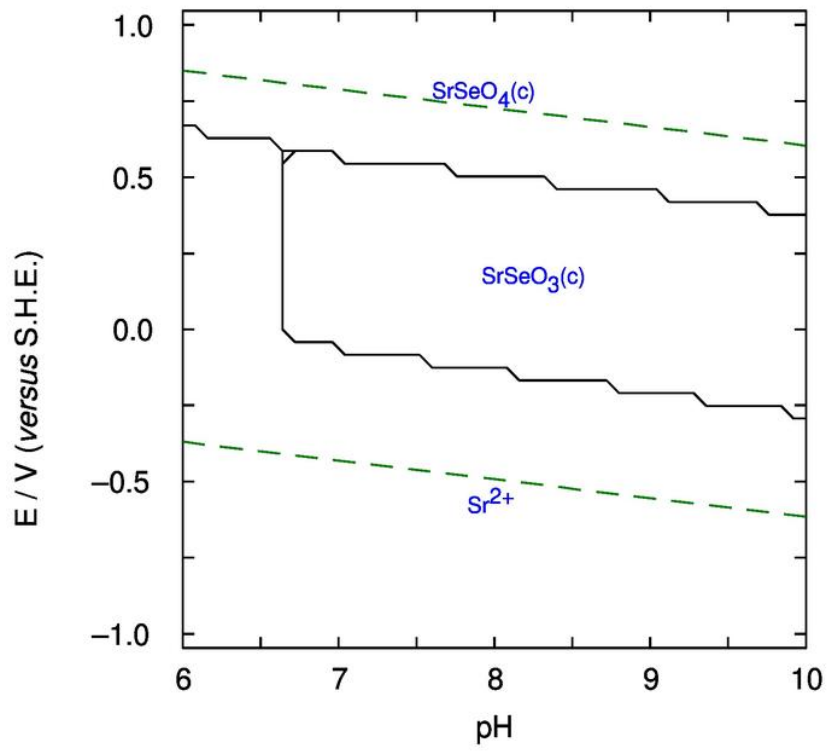

## Se

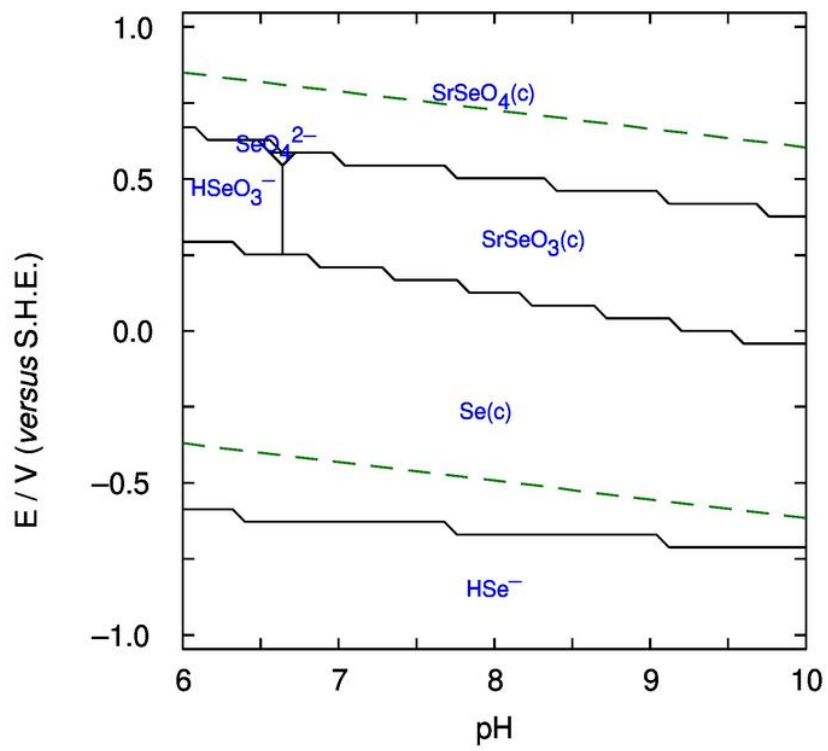

# SrY

## Sr

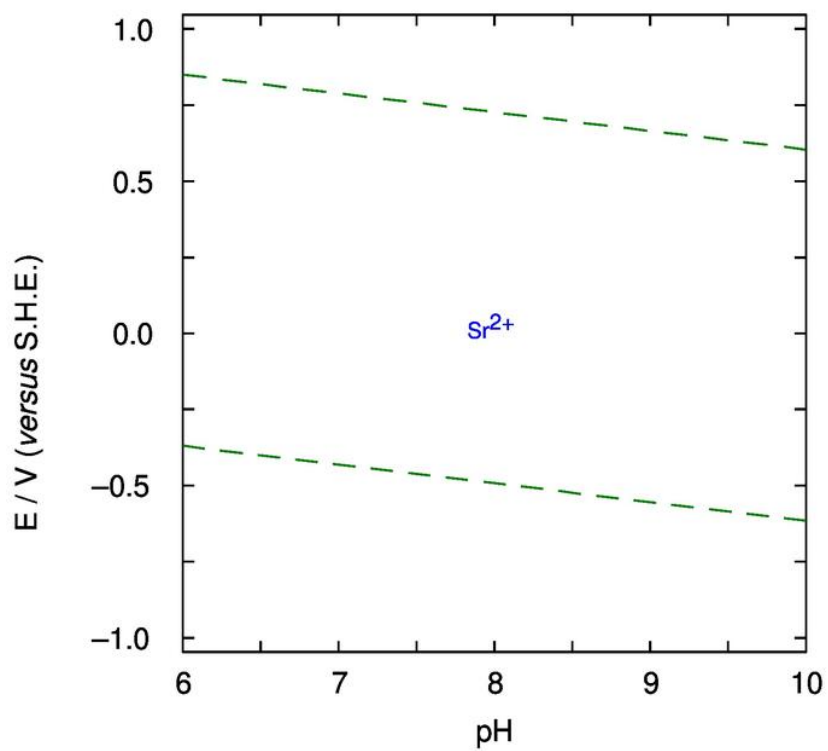

## Y

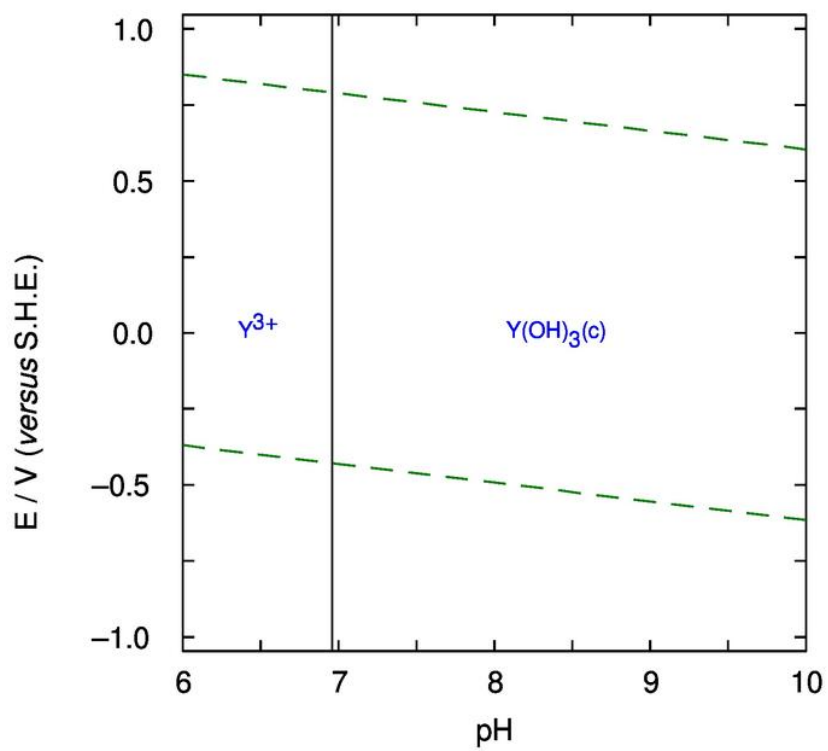



# SrZn

## Sr



## Zn



# SrZr

## Sr

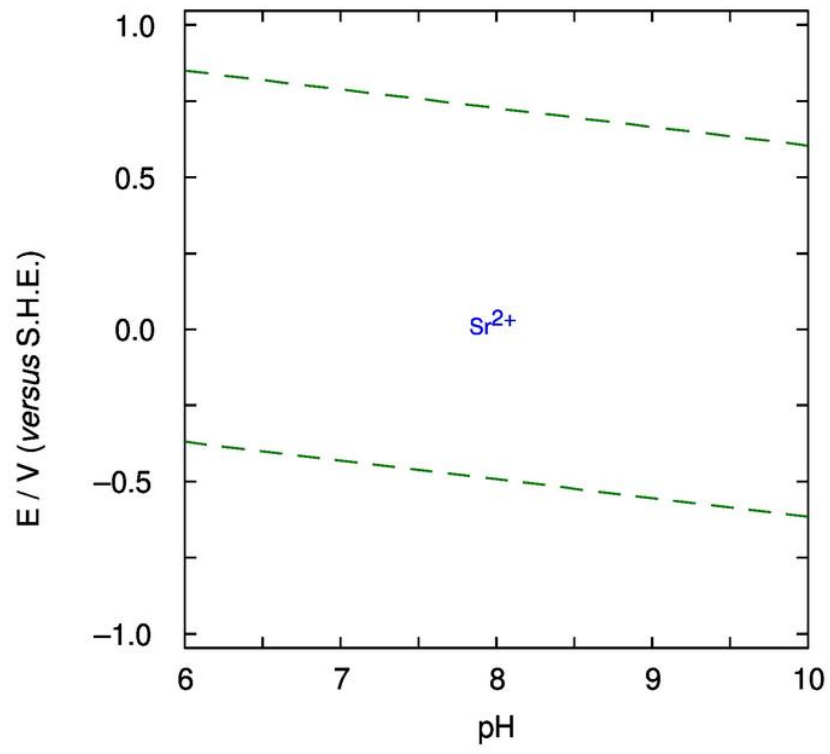

## Zr

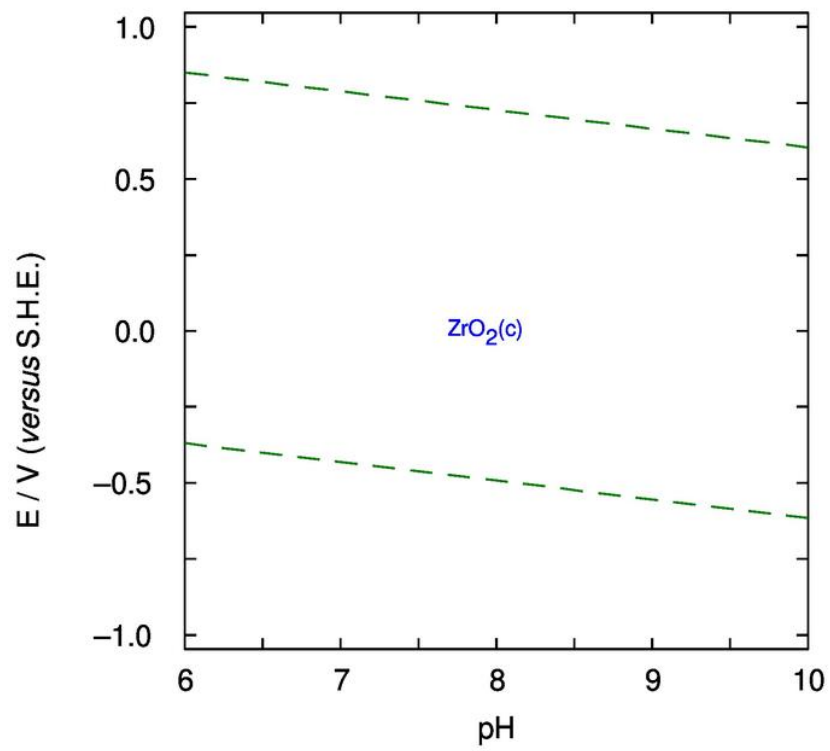

# TeAg

## Te

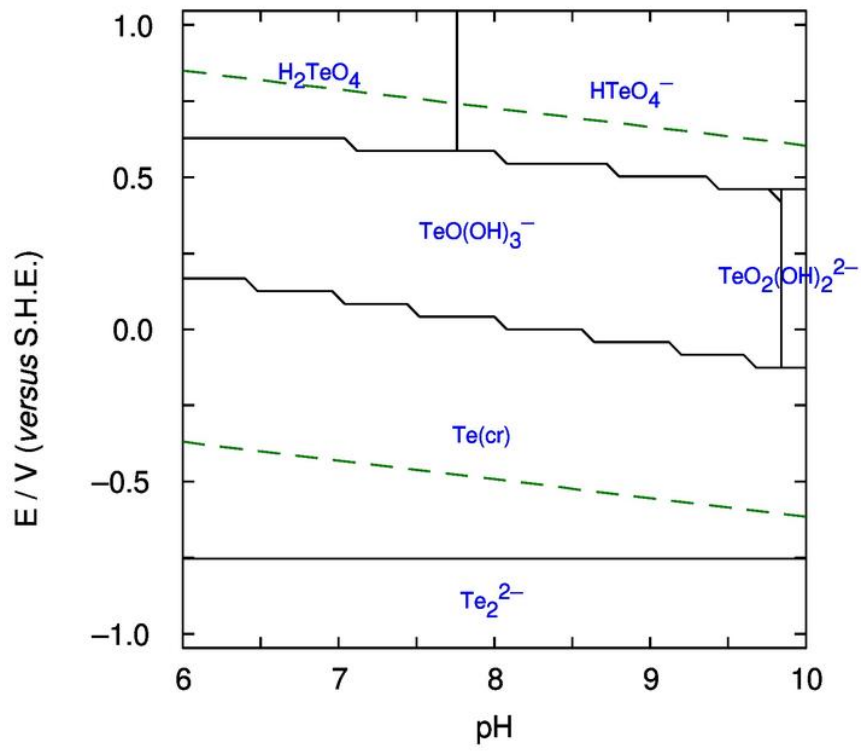

## Ag



# TeAl

## Te



## Al



# TeCd

## Te



## Cd



# TeCo

## Te



## Co



# TeCr

## Te



## Cr



# TeCu

## Te



## Cu





# TeFe

## Te



## Fe



# TeIn

## Te



## In



# TeMn

## Te

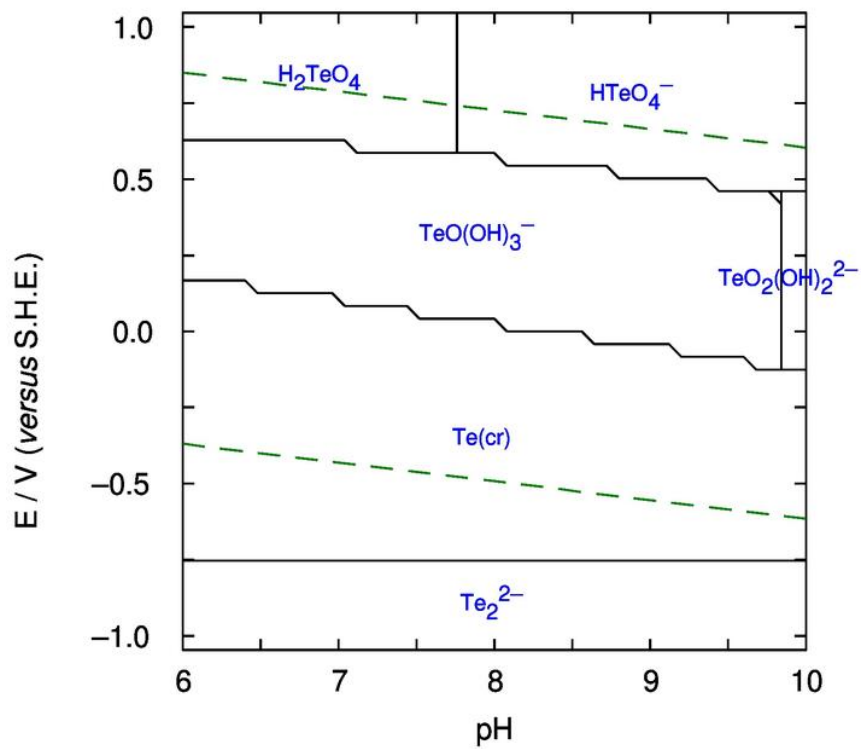

## Mn

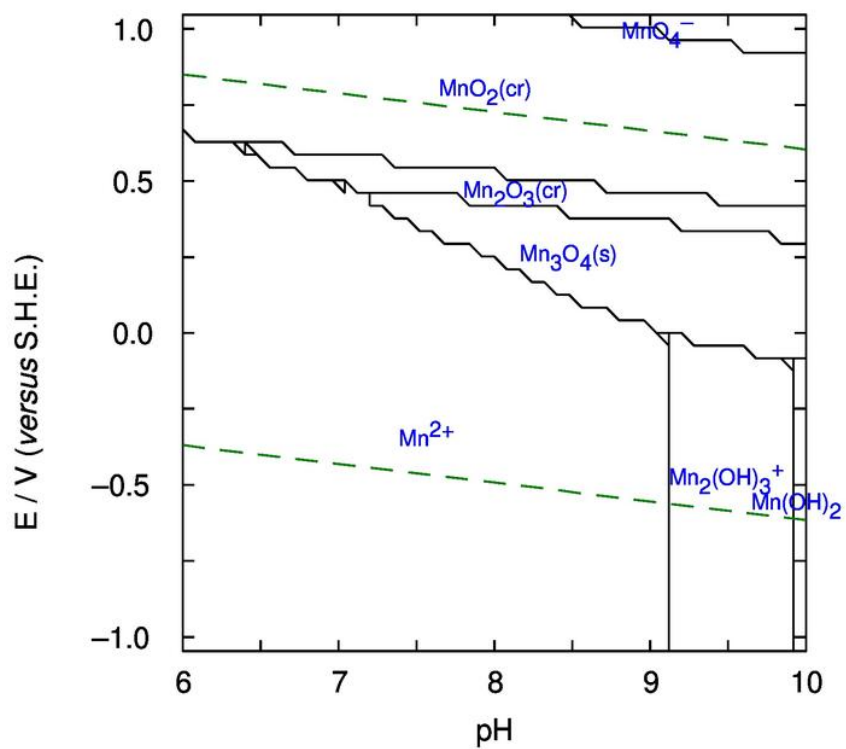

# TeMo

## Te



## Mo



# TeNi

## Te



## Ni



# TeRb

## Te



## Rb



# TeS

## Te

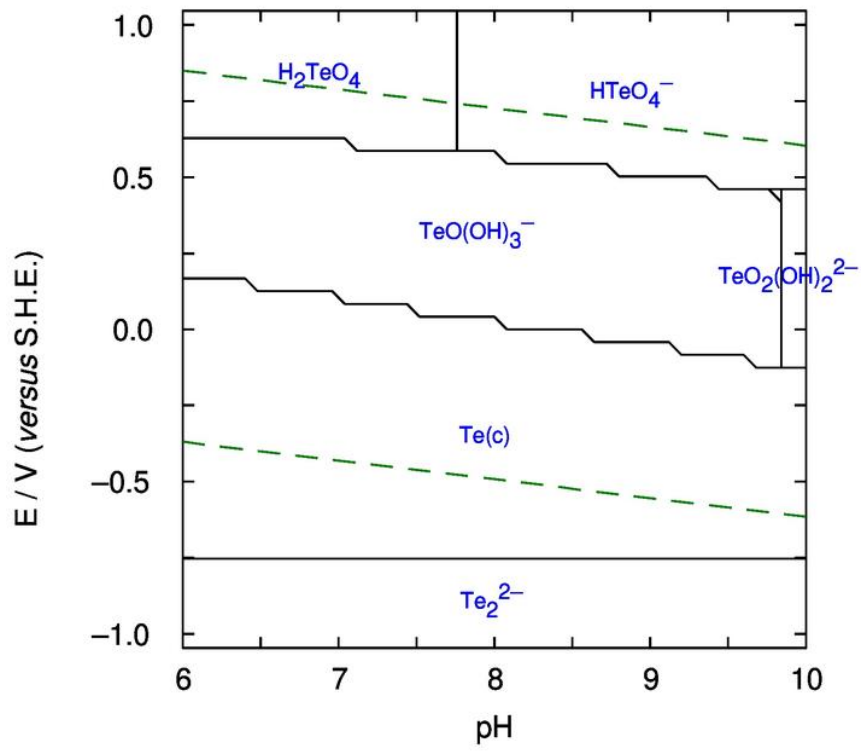

## S



# TeSe

## Te



## Se

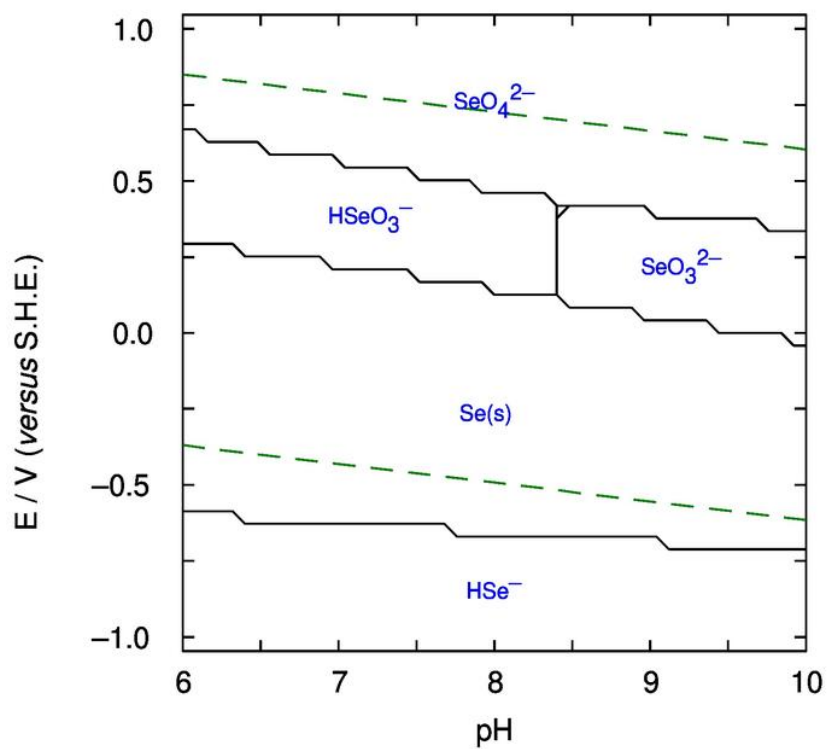



# TeSn

## Te



## Sn



# TeSr

## Te



## Sr



# TeV

## Te



## V

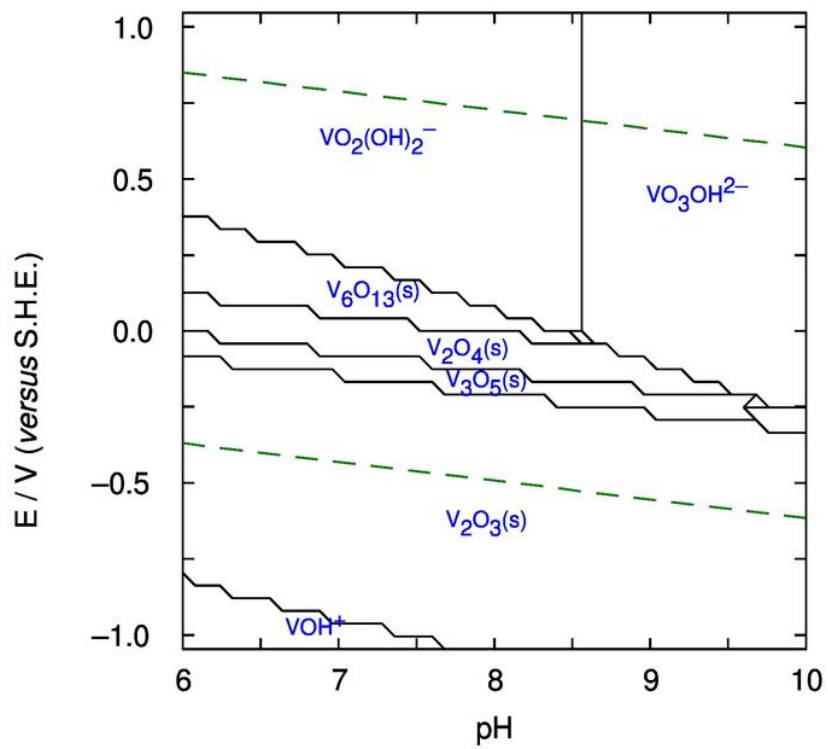

# TeY

## Te



## Y



# TeZn

## Te



## Zn



# TeZr

## Te

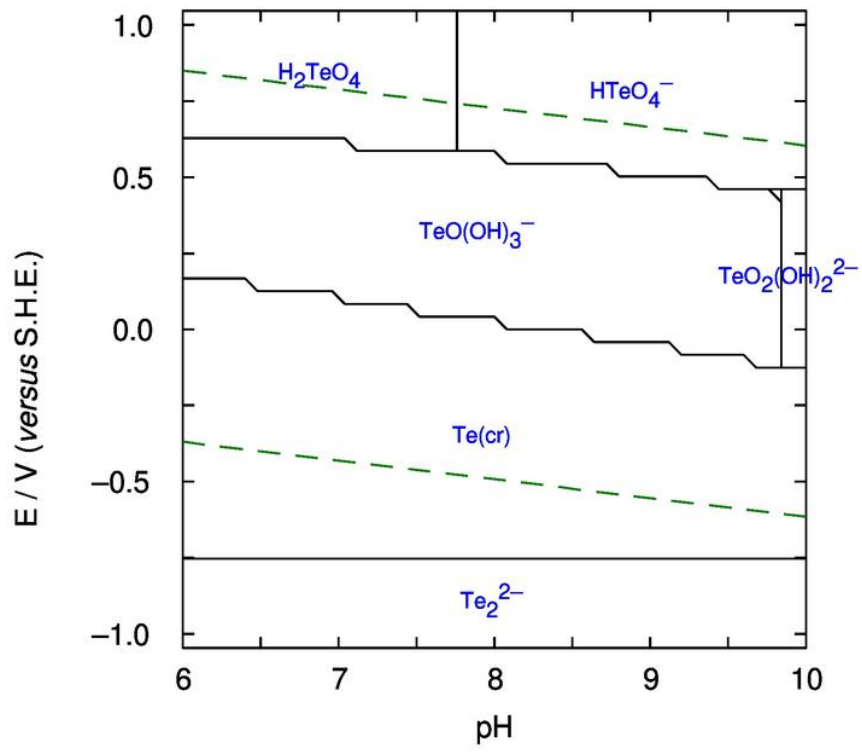

## Zr



# VAg

## V

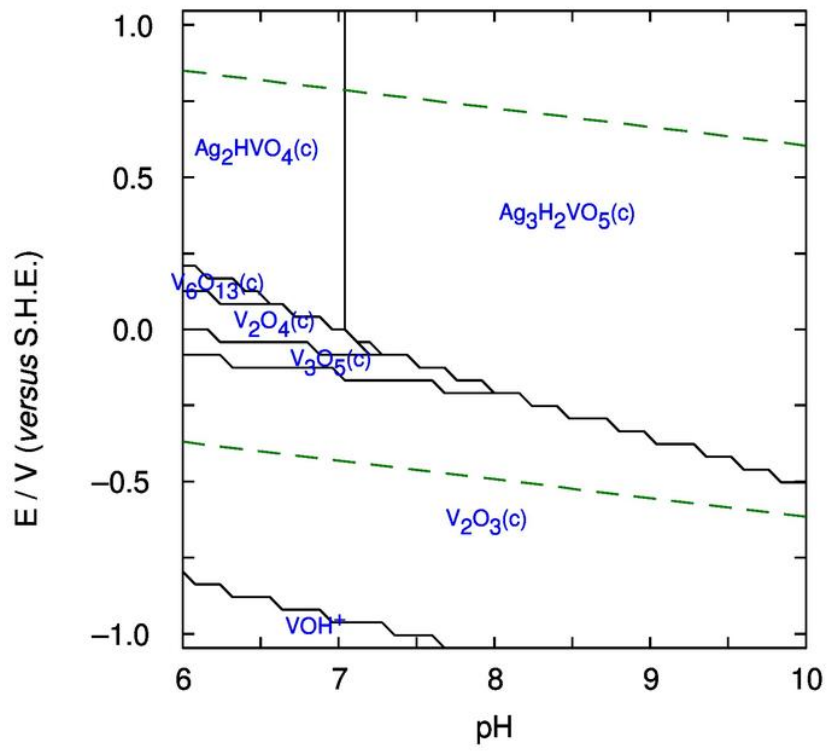

## Ag

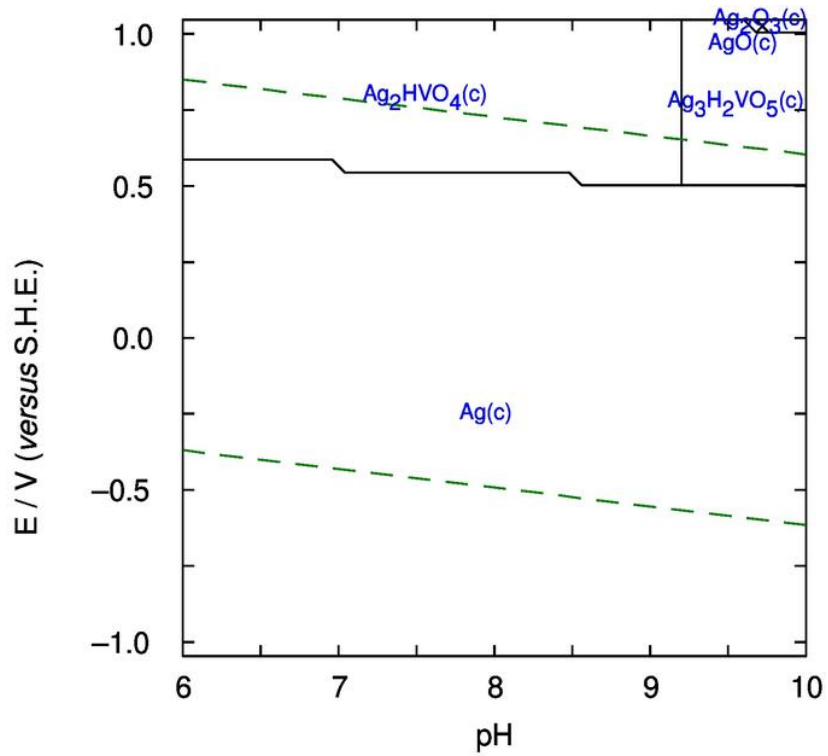

# VCo

## V

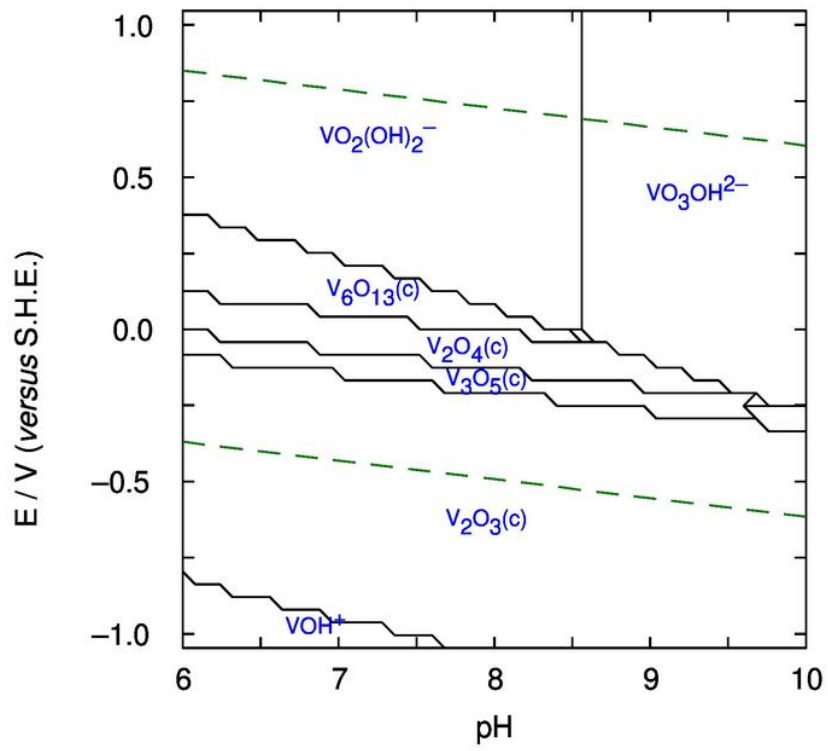

## Co





# VCr

## V

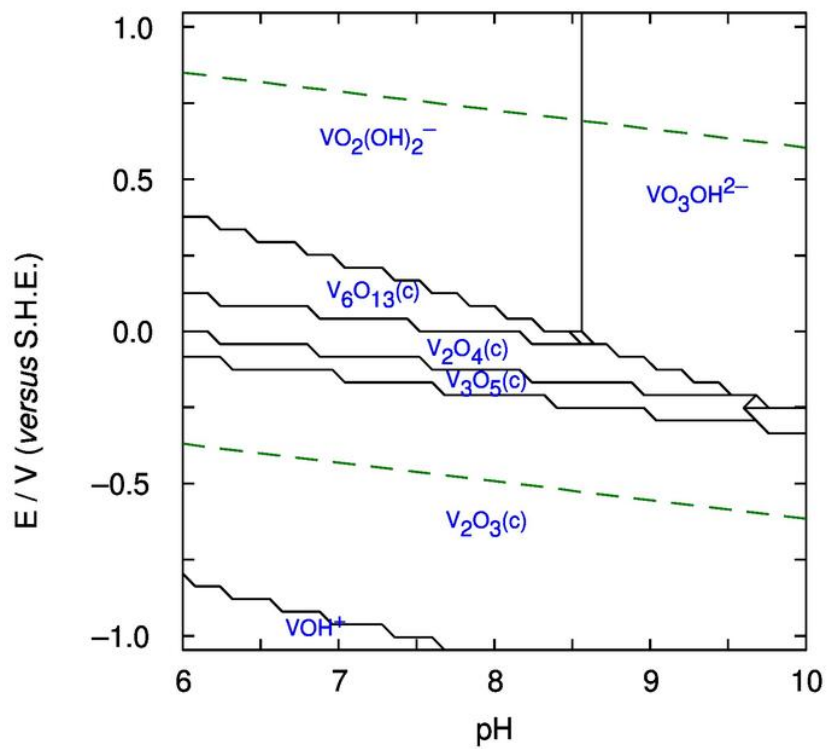

## Cr

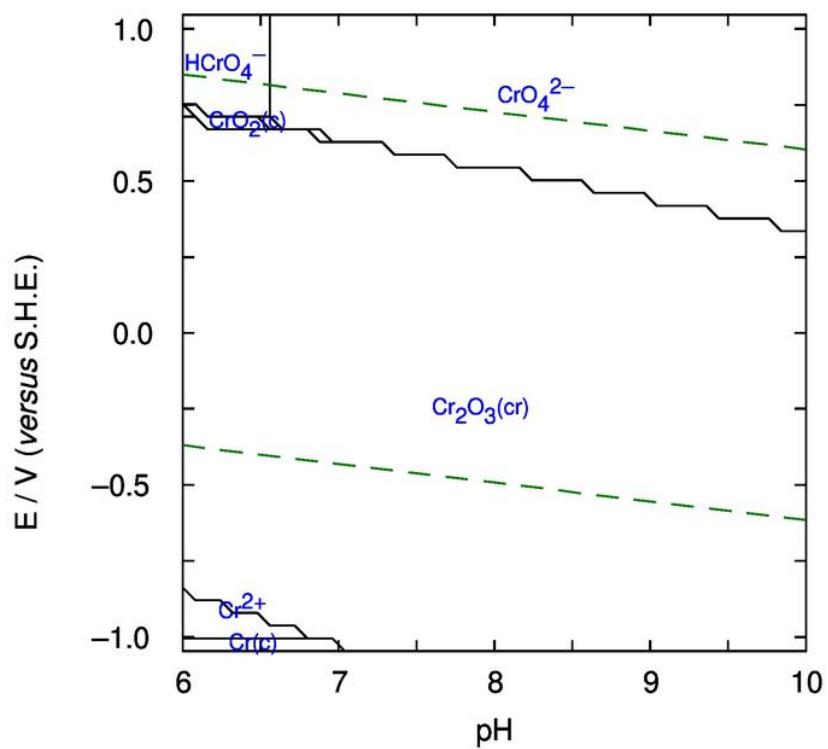

# VCu

## V



## Cu

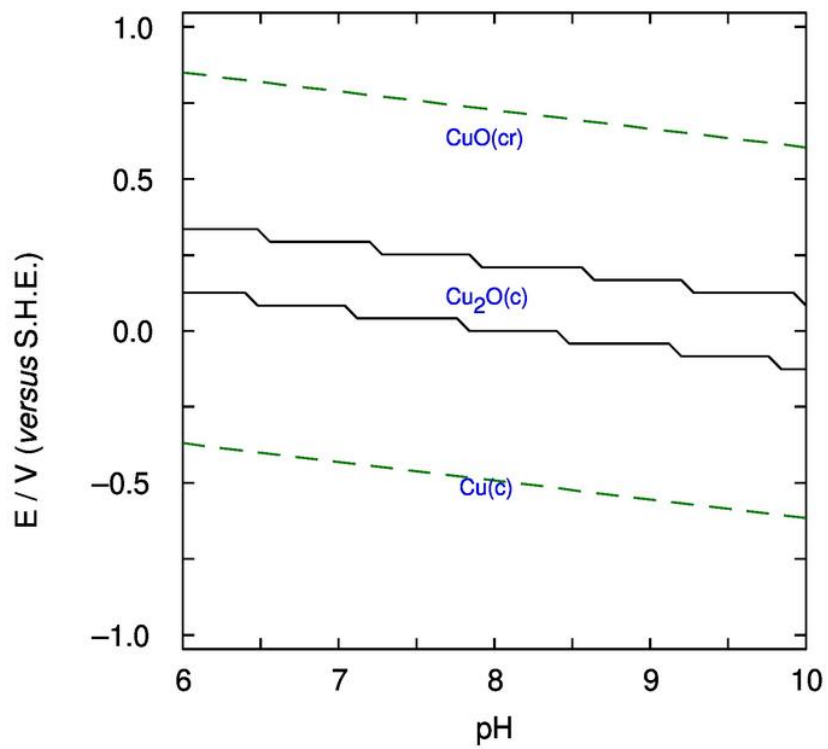

# VFe

## V

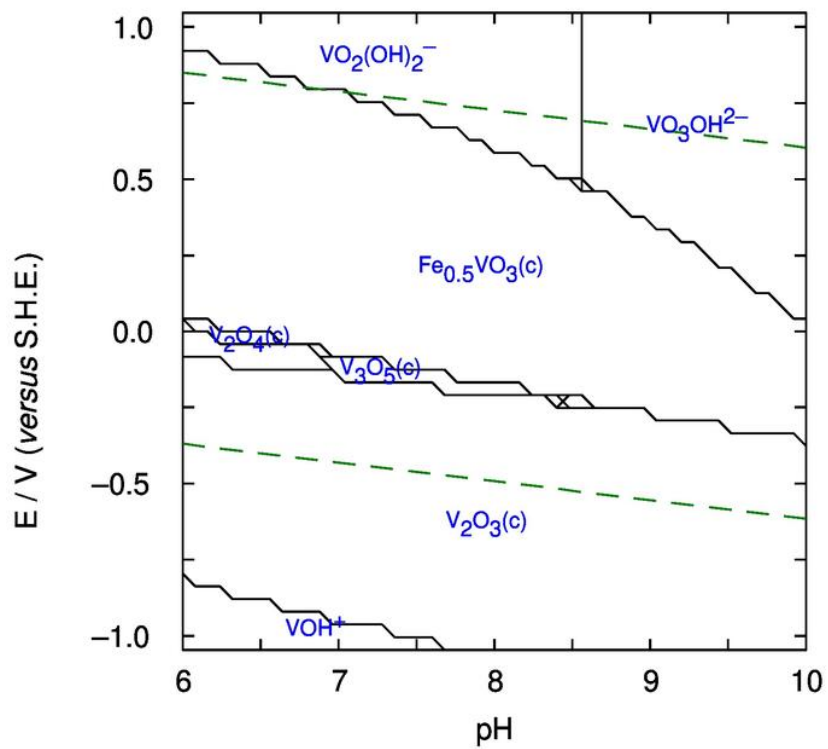

## Fe

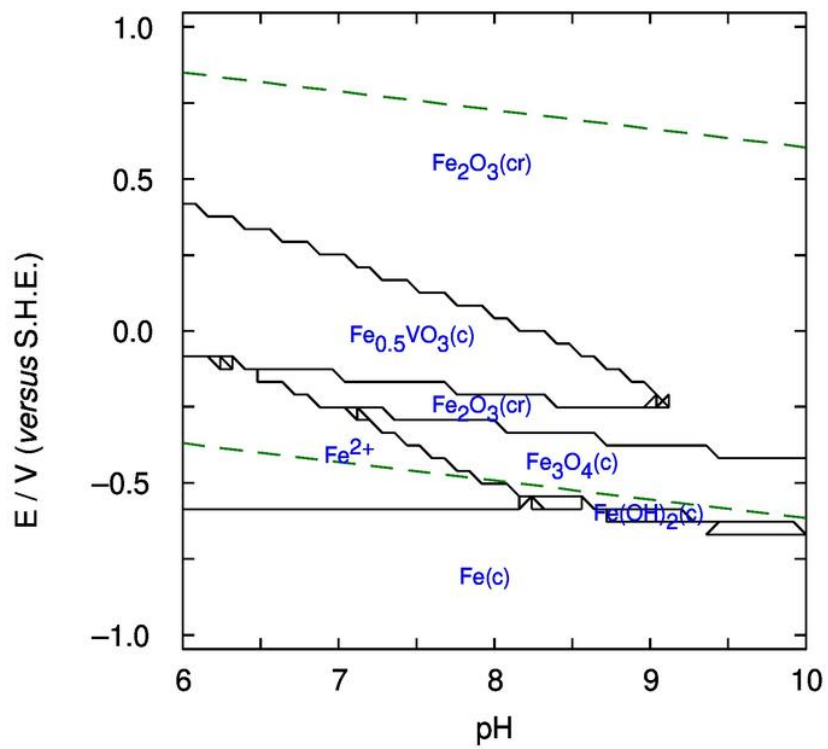

# VMo

## V



## Mo



# VNi

## V



## Ni

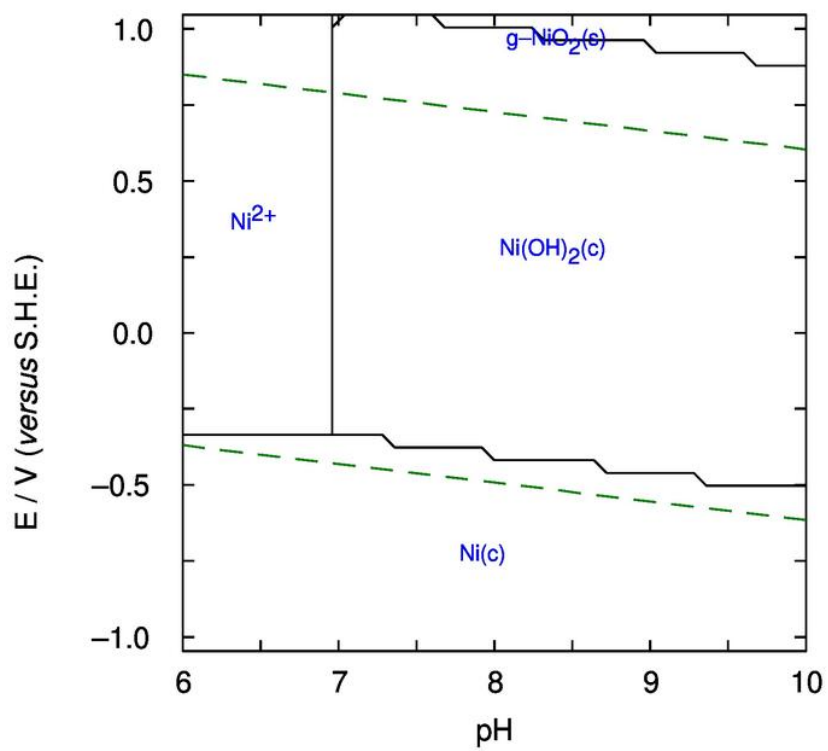

# VRb

## V

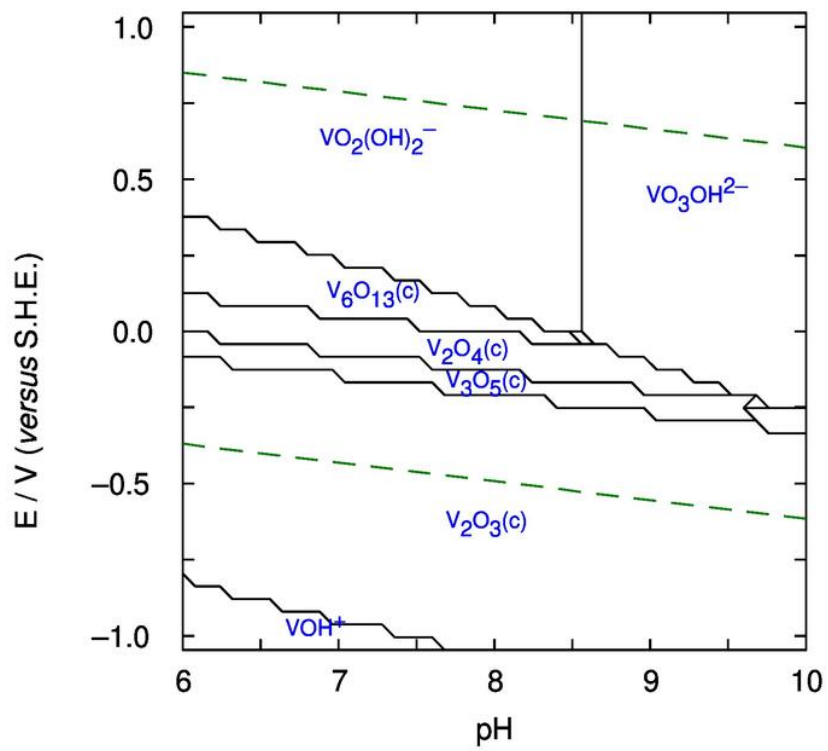

## Rb

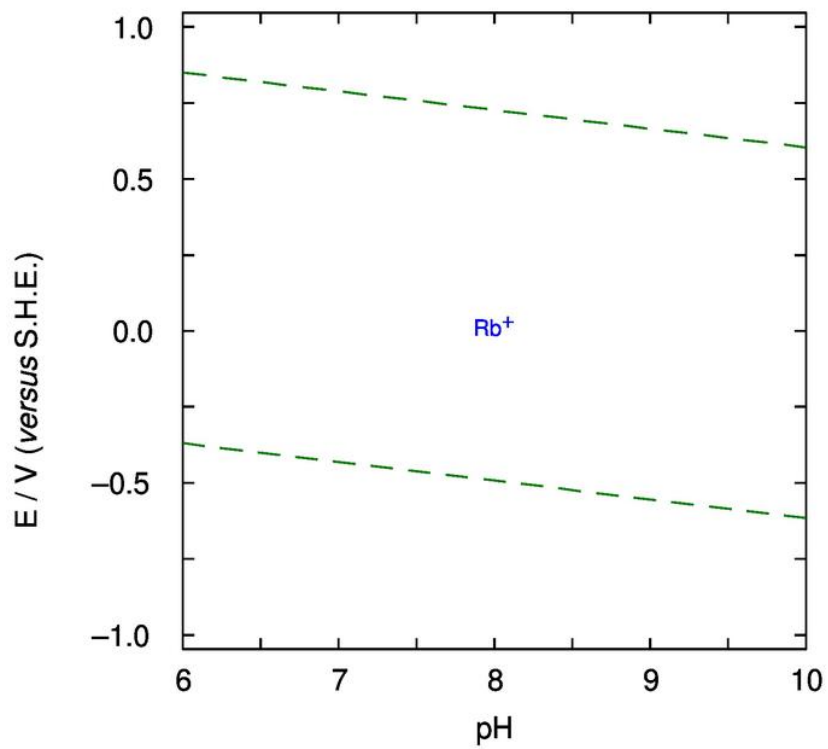

# VS

## V



## S



# VSe

## V



## Se





# VSr

## V



## Sr



VY

V



Y



# VZn

## V



## Zn



# VZr

## V



## Zr



# WAg

## W

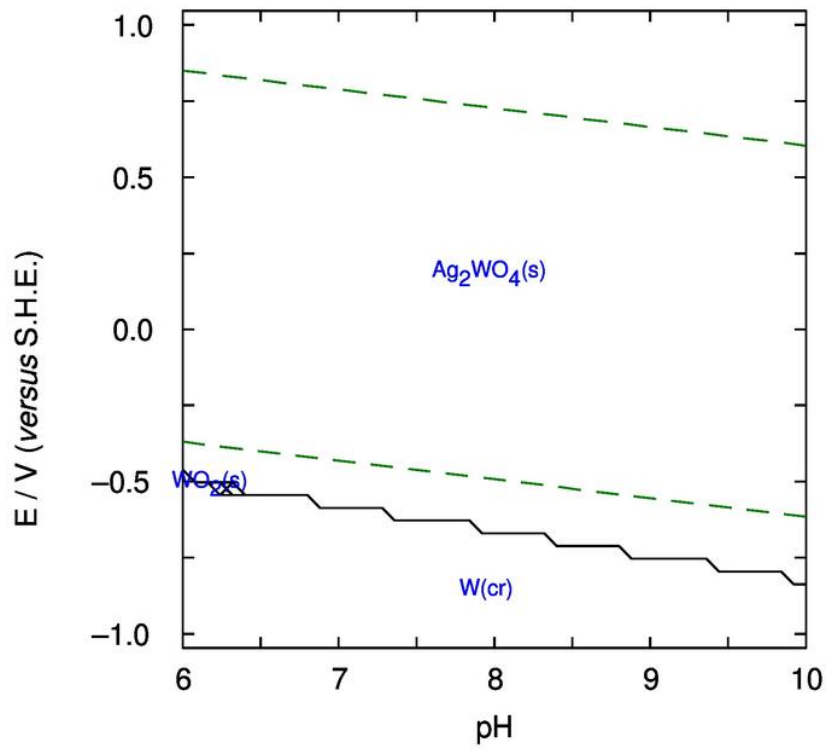

## Ag

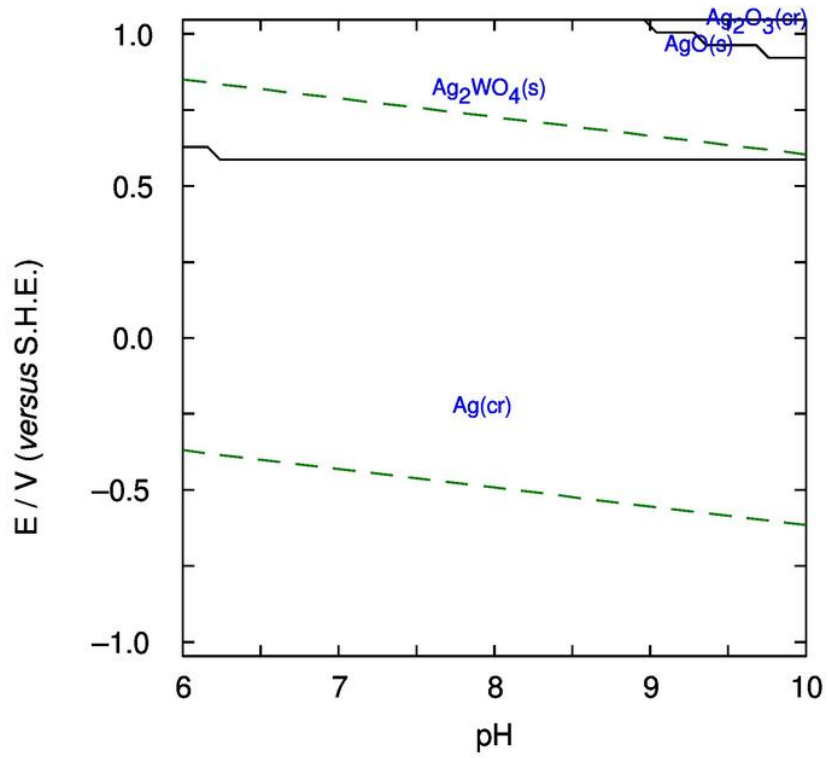

# WAI

## W

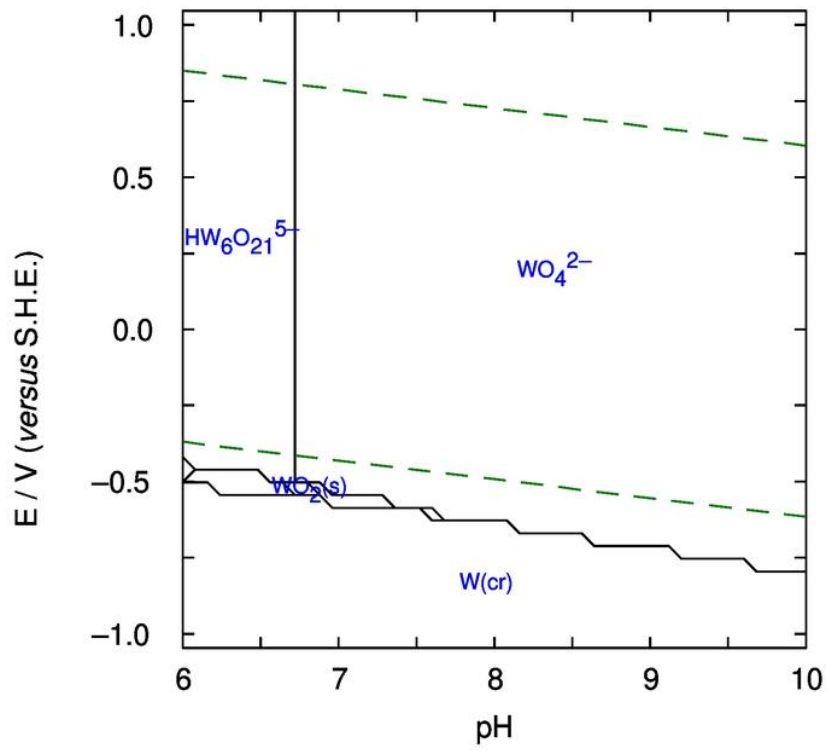

## Al



# W Ba

## W



## Ba



# WCd

## W



## Cd





# W

## W

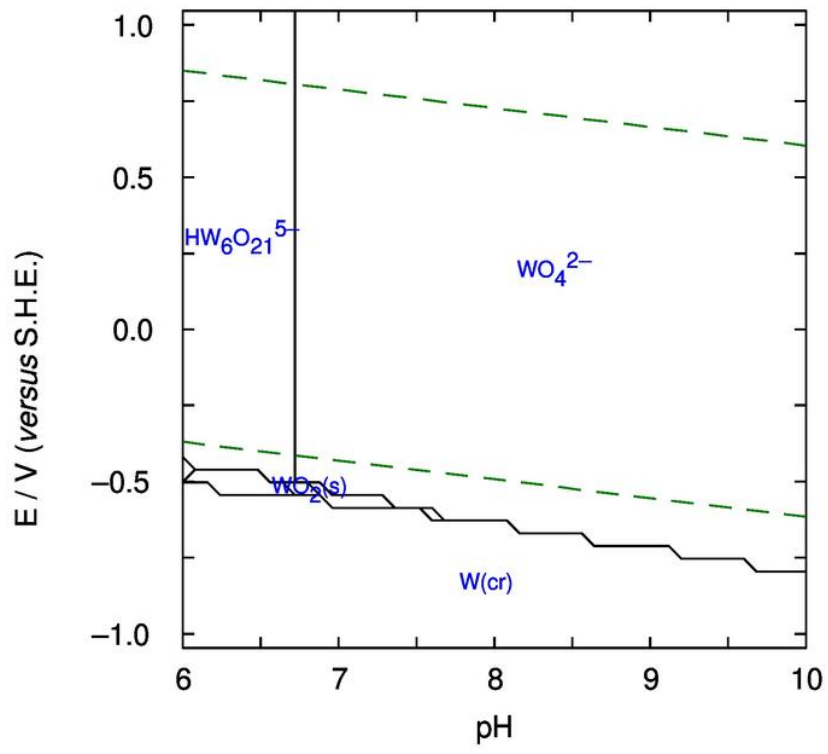

## Ce

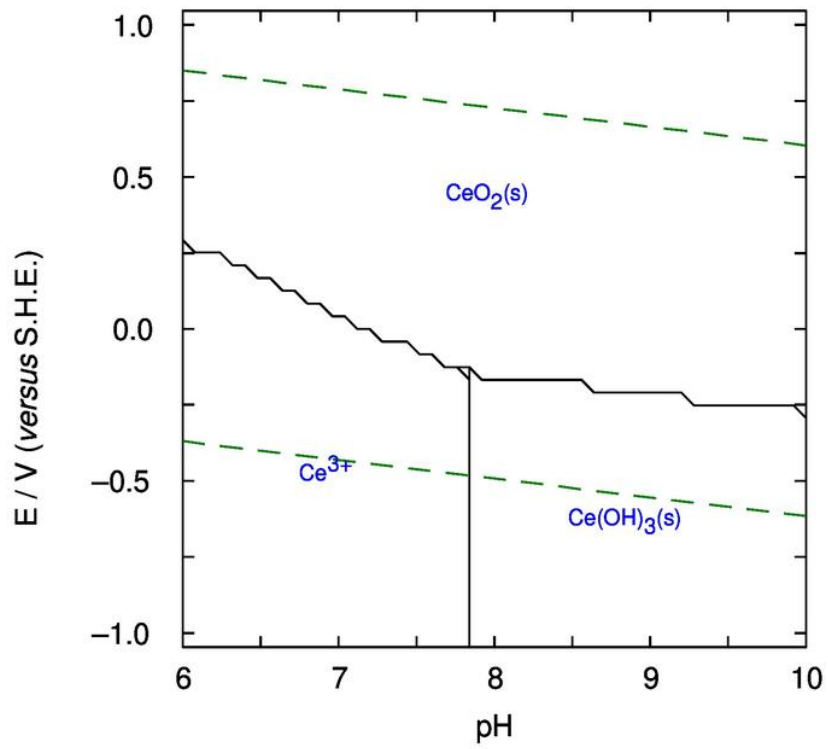

# WCo

## W



## Co



# WCr

## W



## Cr



# WCu

## W



## Cu



# WEu

## W



## Eu



# WFe

## W



## Fe



# WGd

## W



## Gd



# WIn

## W



## In





# WLa

## W



## La



# WMn

## W



## Mn



# W

## W



# Mo



# WNd

## W



## Nd



# WNi

## W

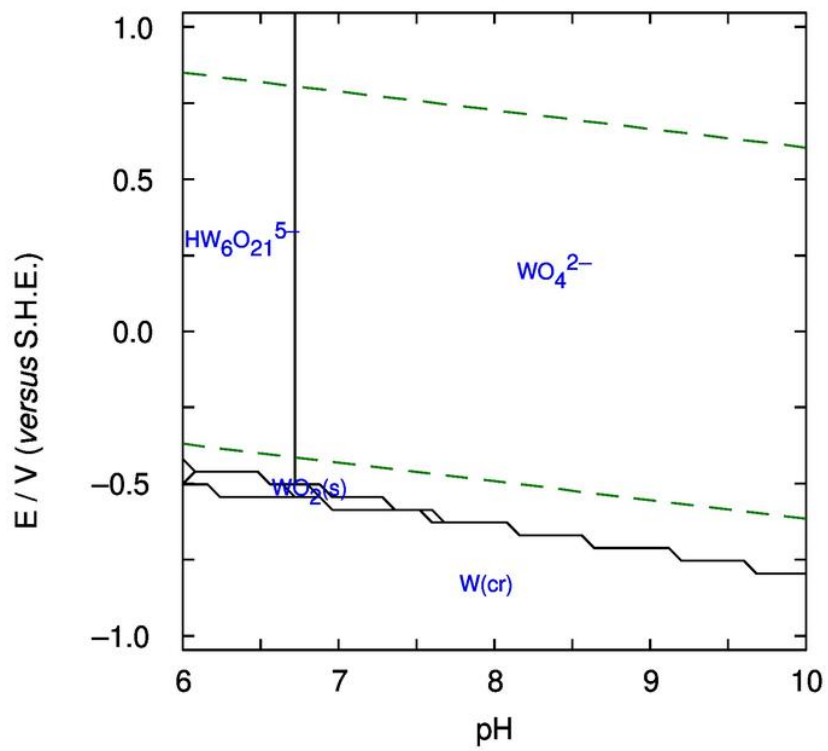

## Ni

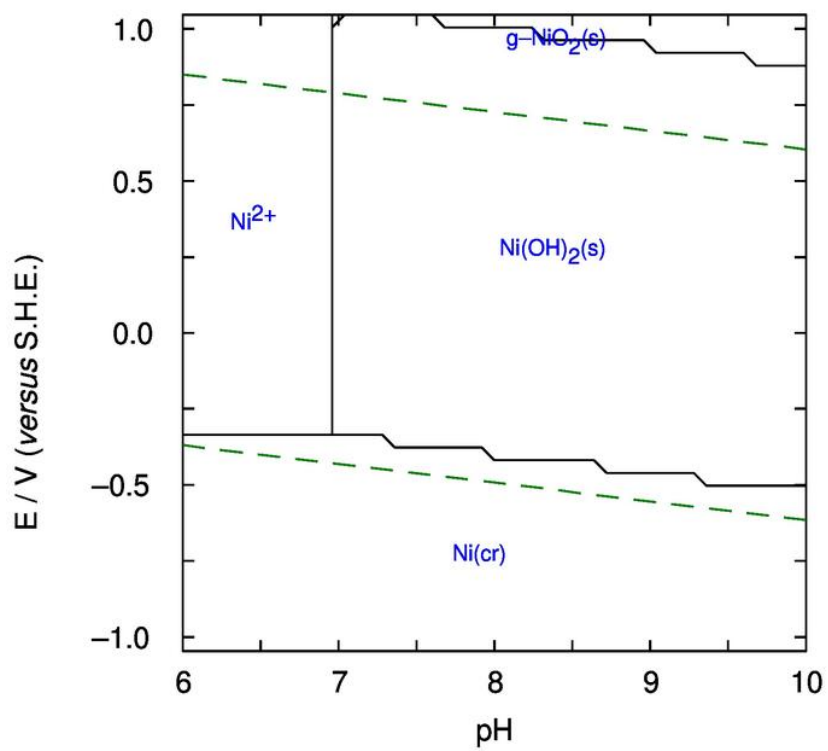

# WPr

## W



## Pr



# WRb

## W



## Rb



# WS

## W

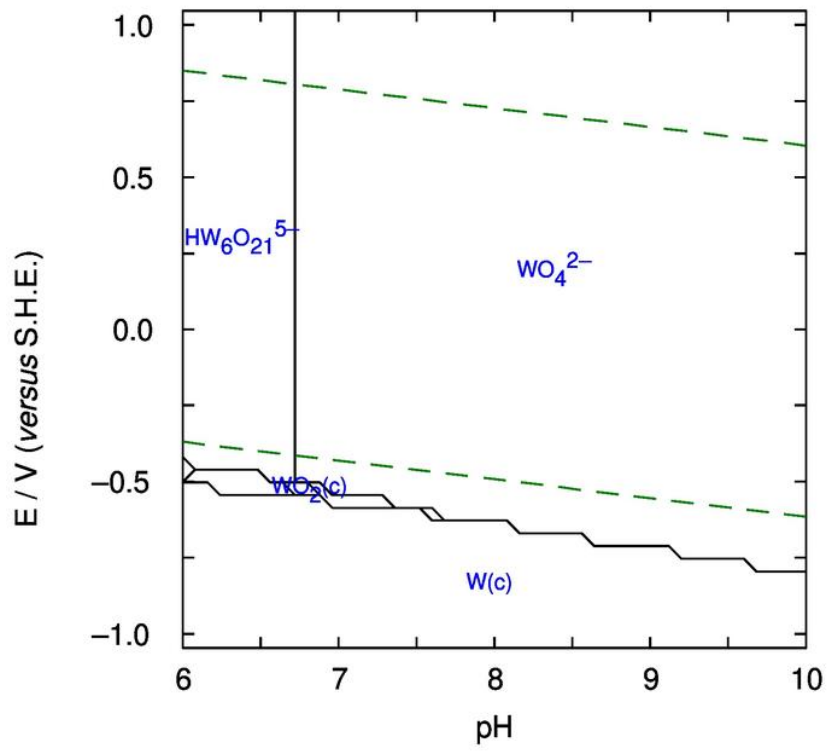

## S





# WSe

## W

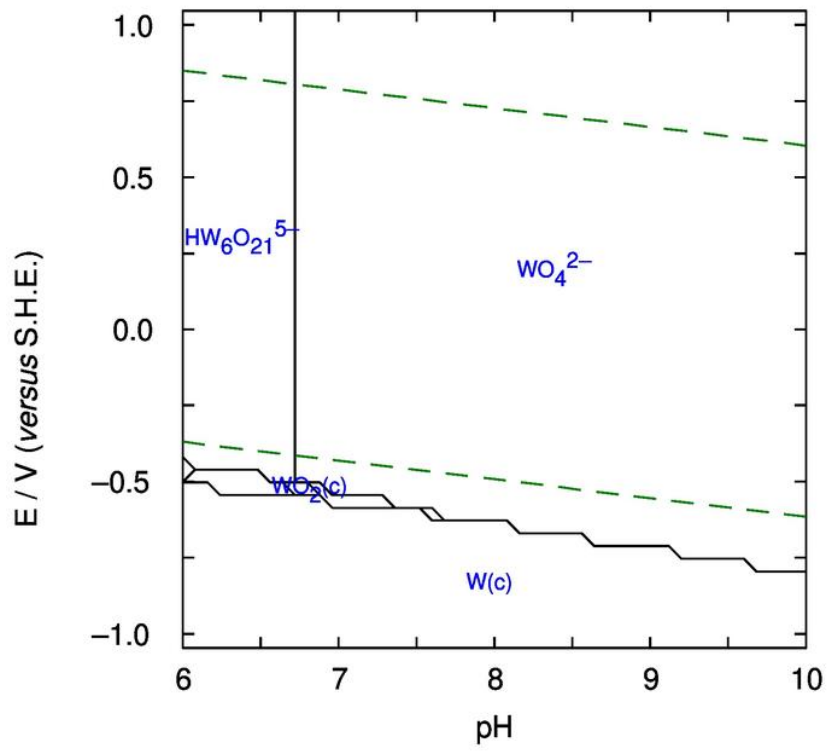

## Se



# WSm

## W



## Sm

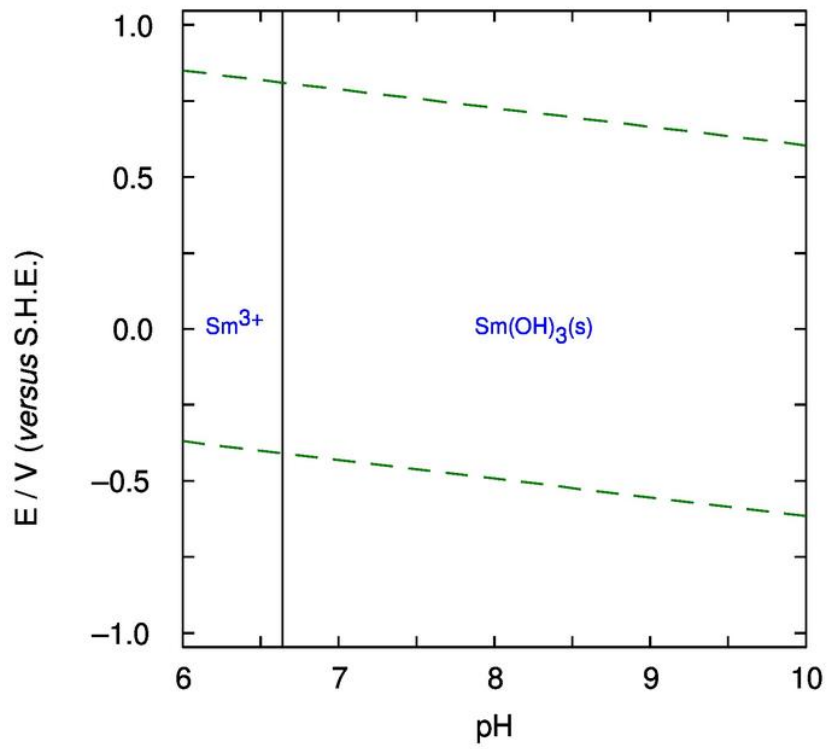

# WSn

## W



## Sn



# WSr

## W



## Sr



# WTe

## W



## Te



# WV

## W

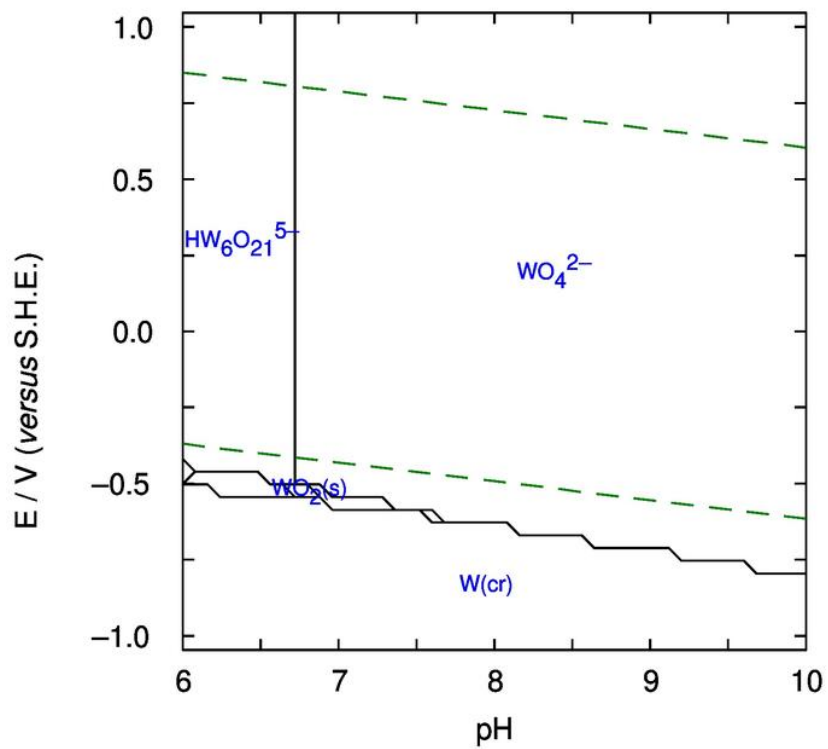

## V

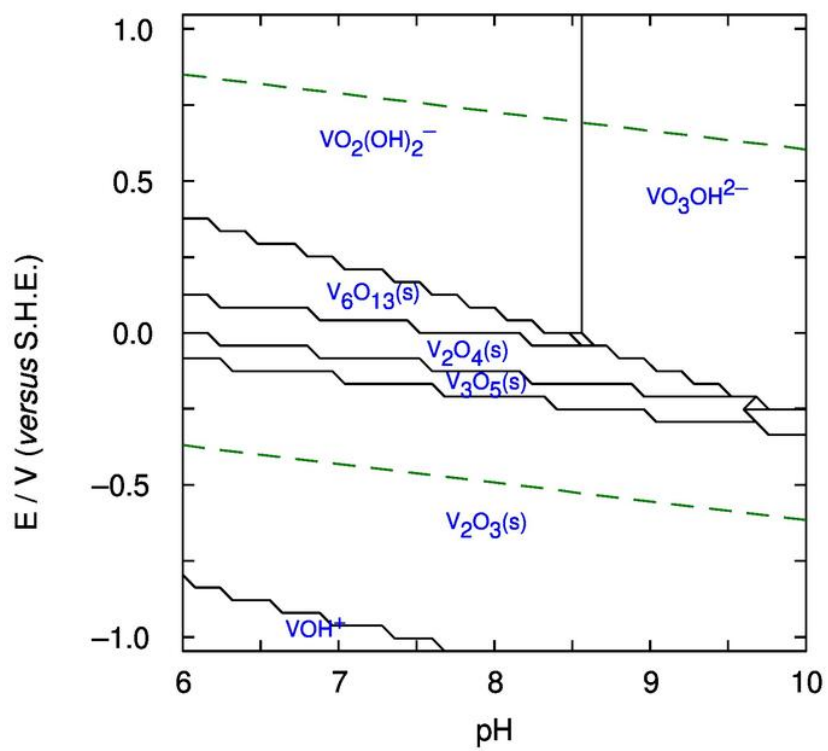

# WY

## W



## Y



# WZn

## W



## Zn

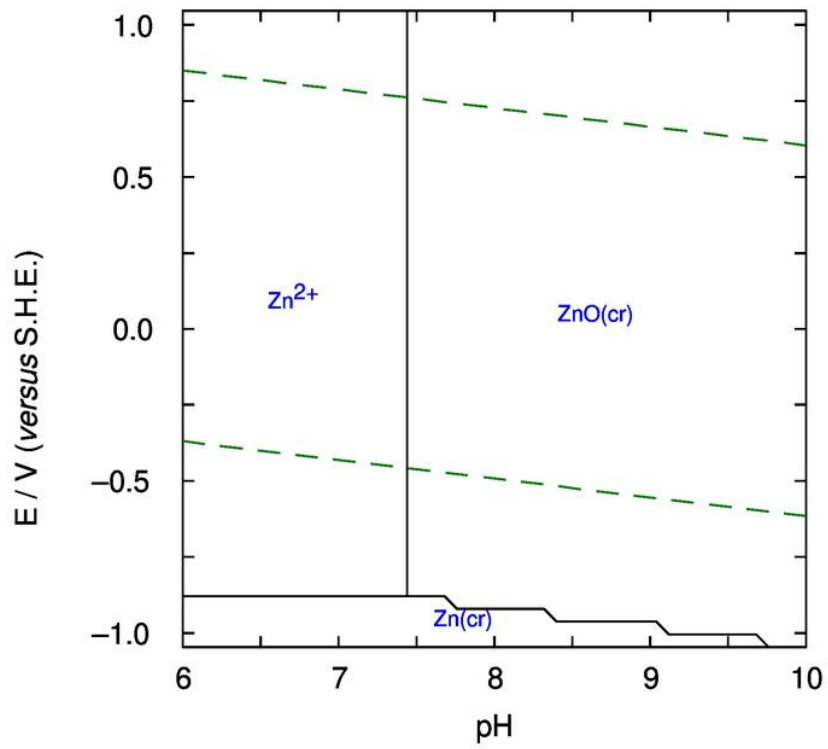



# WZr

## W



## Zr



# YMo

## Y

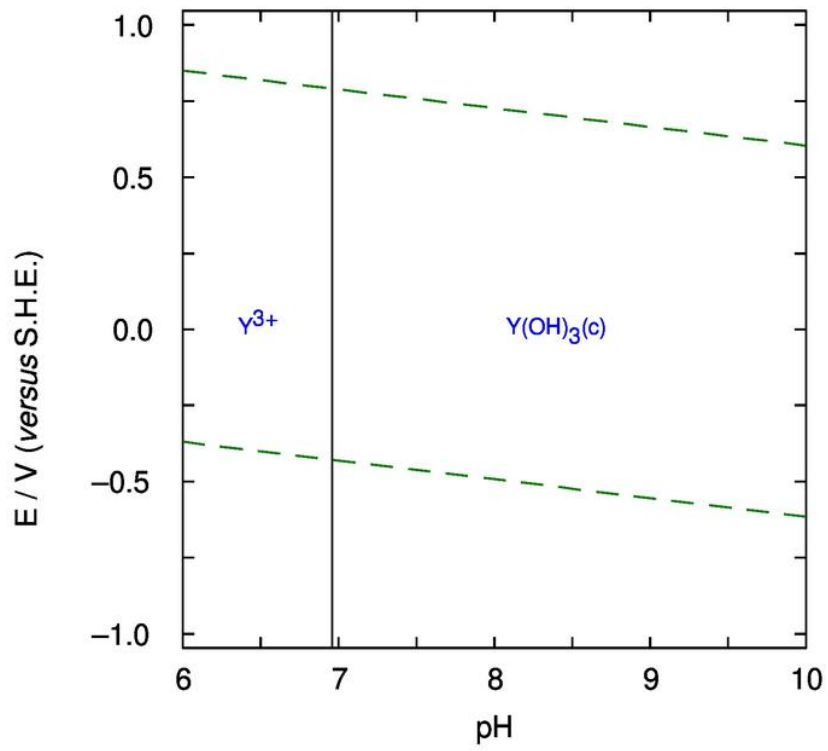

# Mo



# YS

## Y

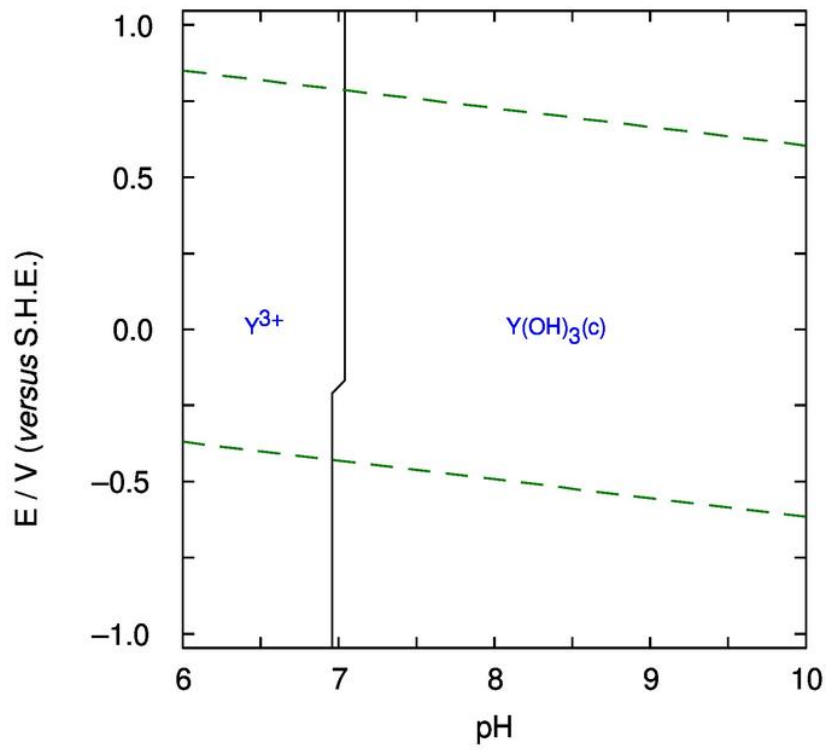

## S



# YZr

## Y

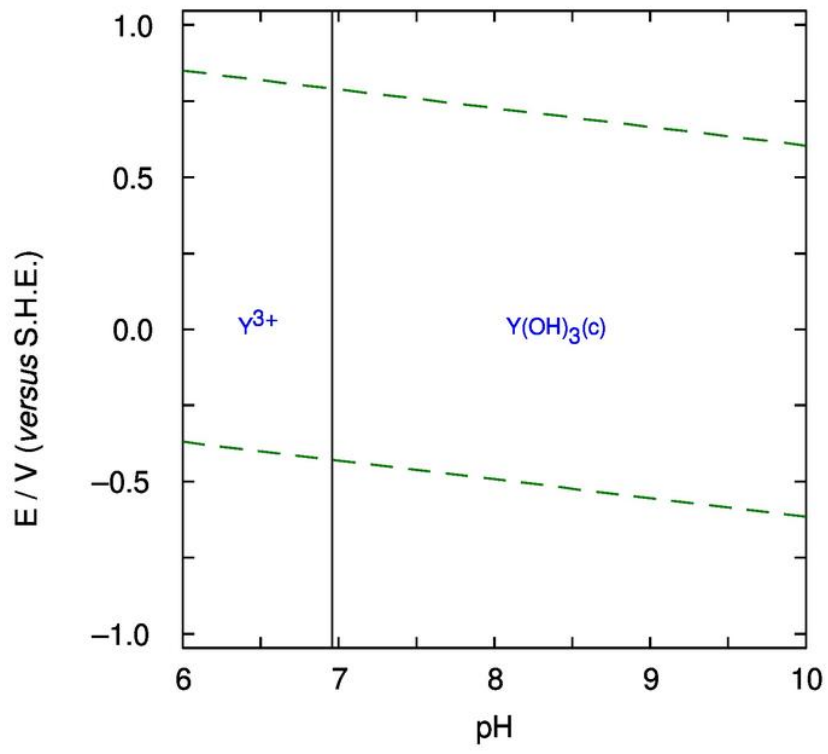

## Zr



# ZnCo

## Zn

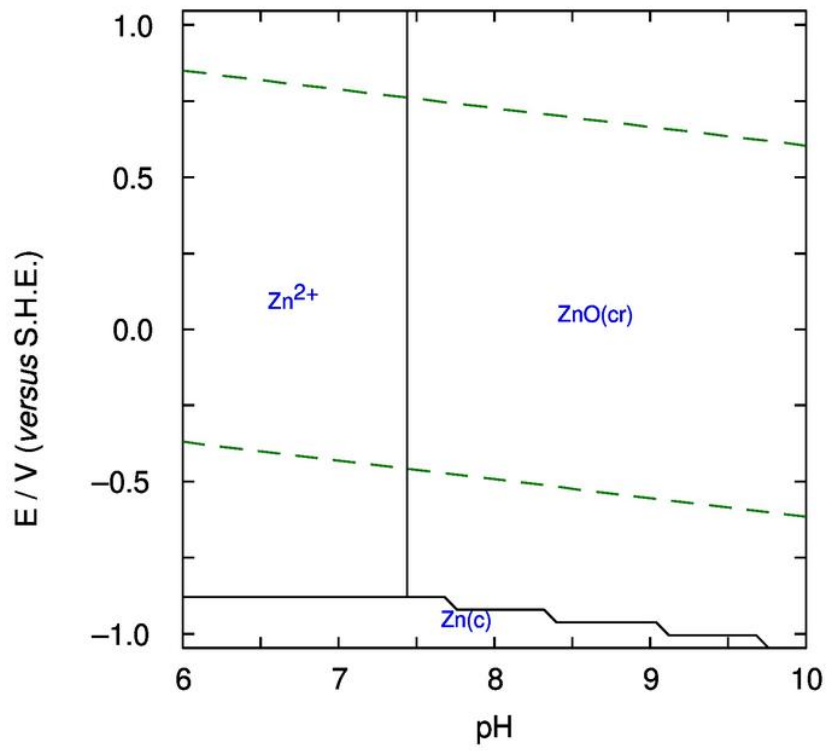

## Co



# ZnCr

## Zn

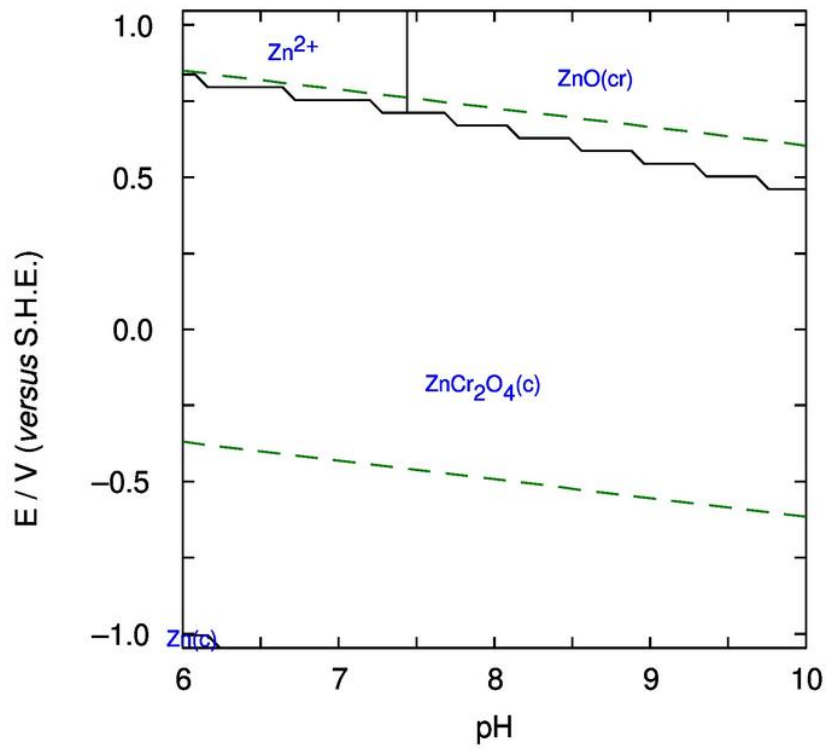

## Cr

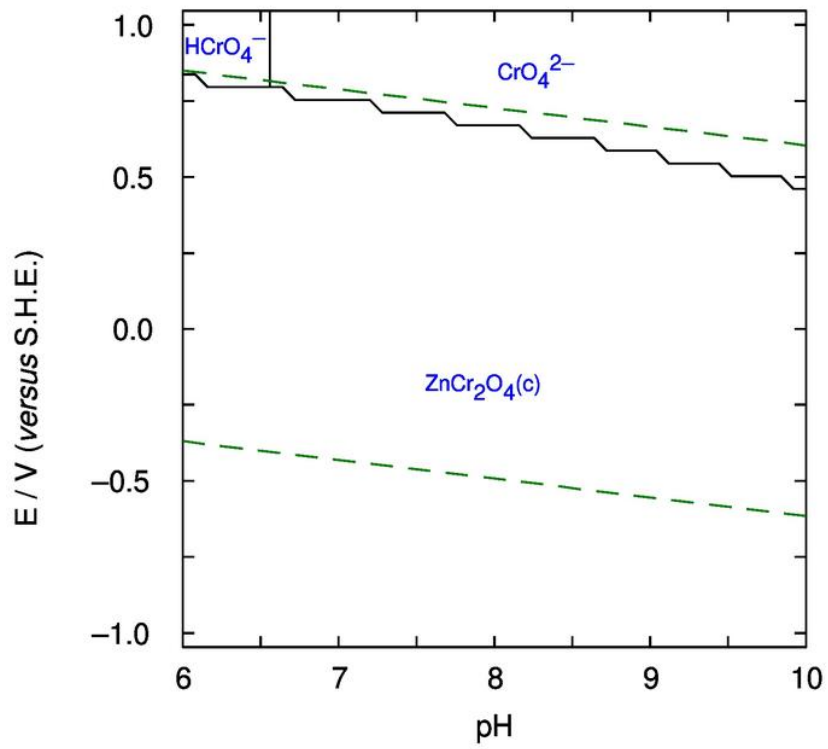

# ZnCu

## Zn



## Cu



# ZnFe

## Zn

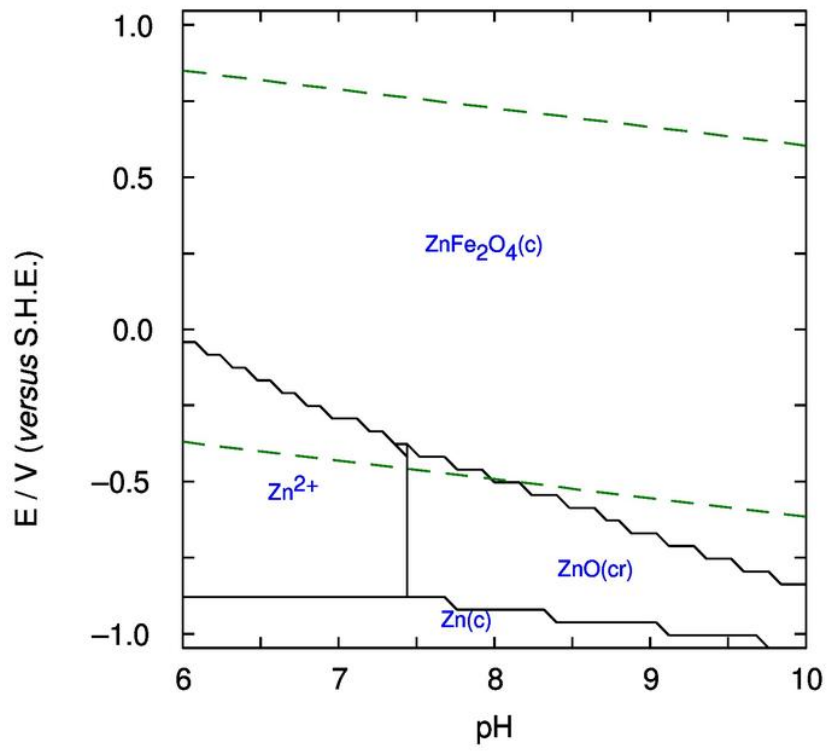

## Fe

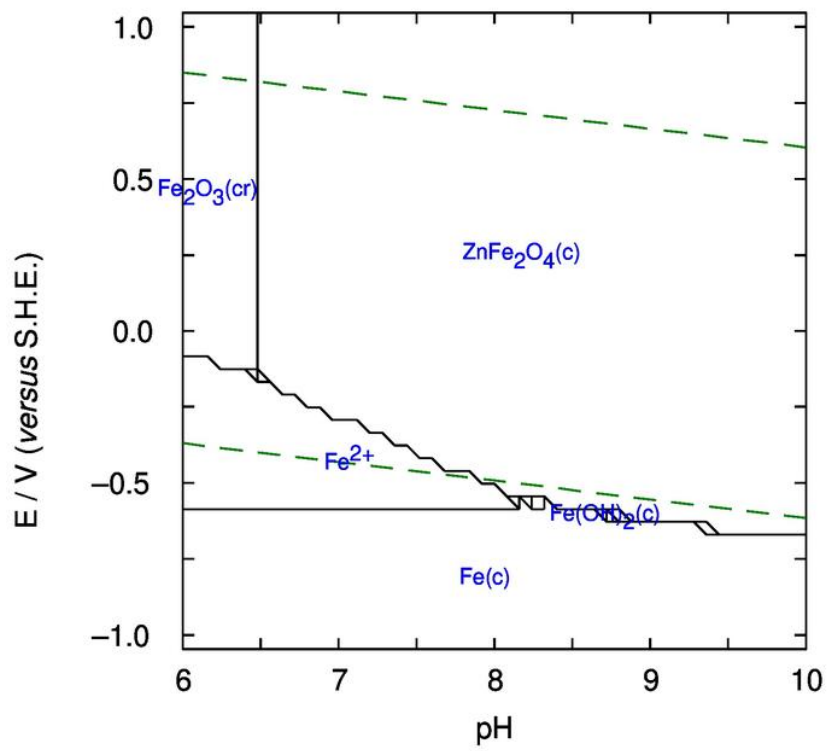



# ZnMn

## Zn



## Mn



# ZnNi

## Zn



## Ni



# ZnRb

## Zn



## Rb



# ZnS

## Zn

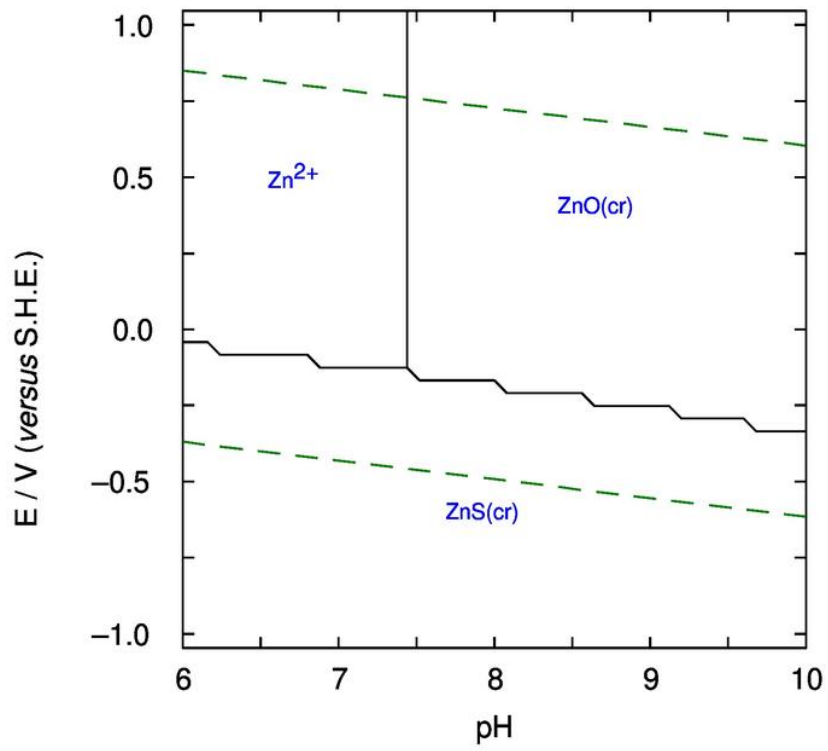

## S

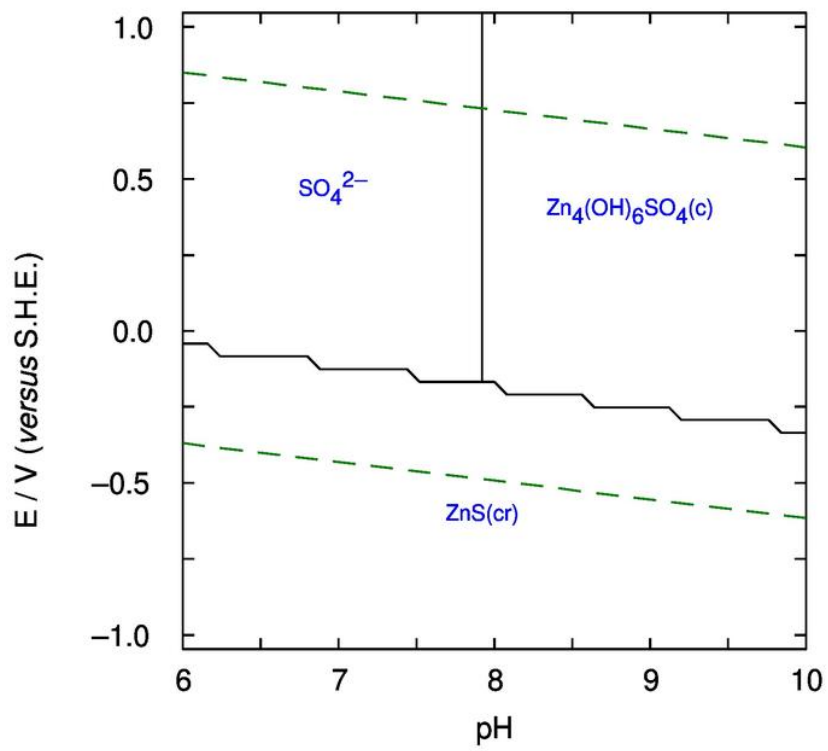

# ZnSe

## Zn

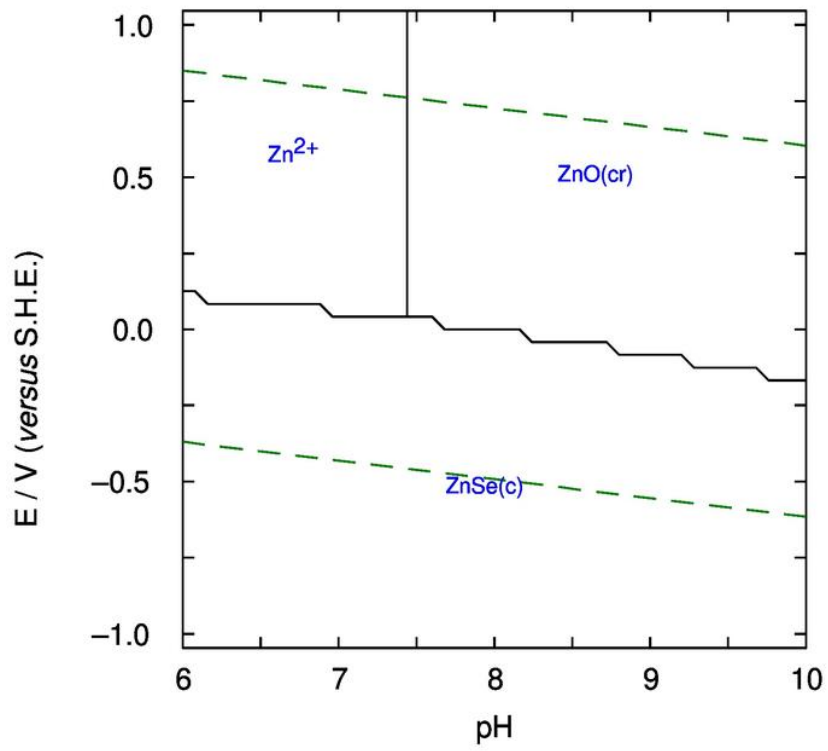

## Se

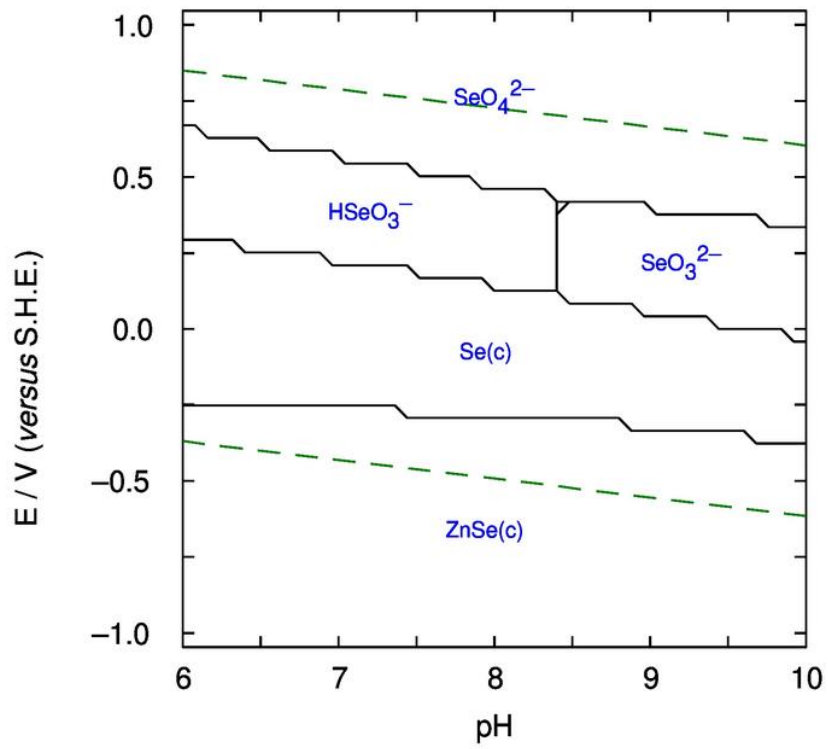

# ZnY

## Zn



## Y



# ZnZr

## Zn

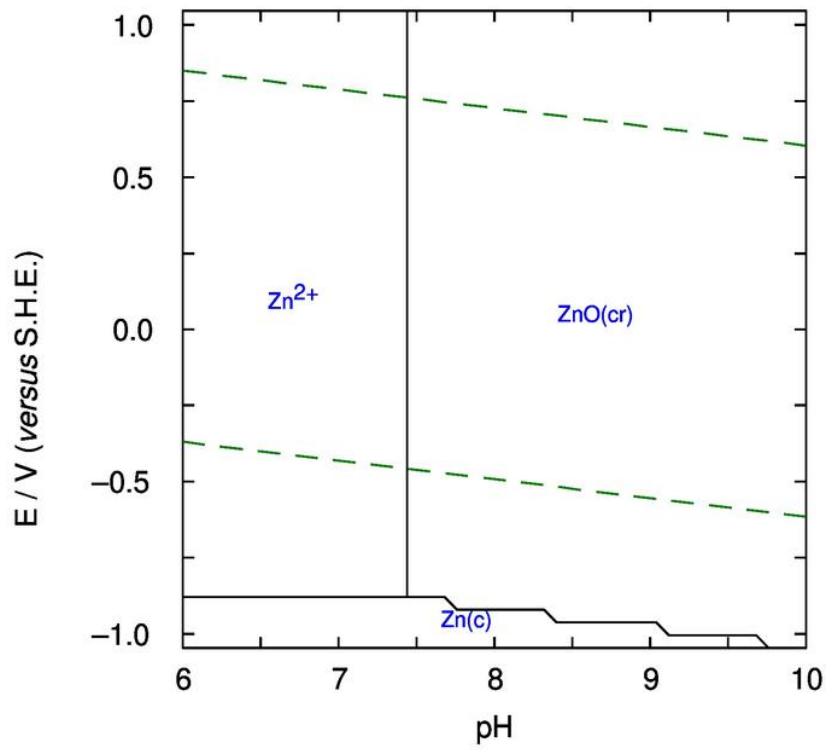

## Zr



# ZrAg

## Zr

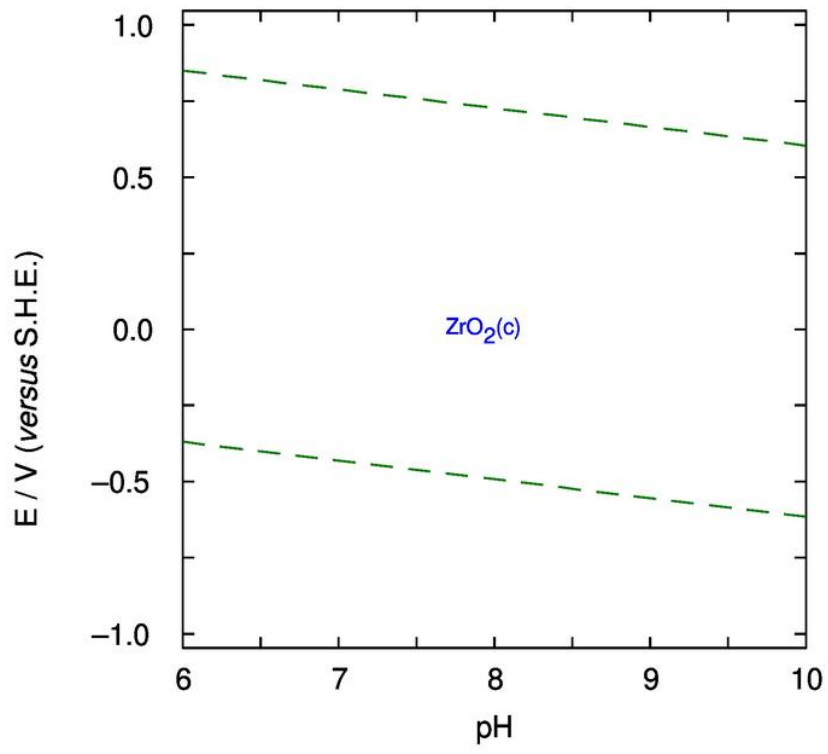

## Ag





# ZrMo

## Zr



## Mo



# ZrS

## Zr



## S



# ZrSe

## Zr

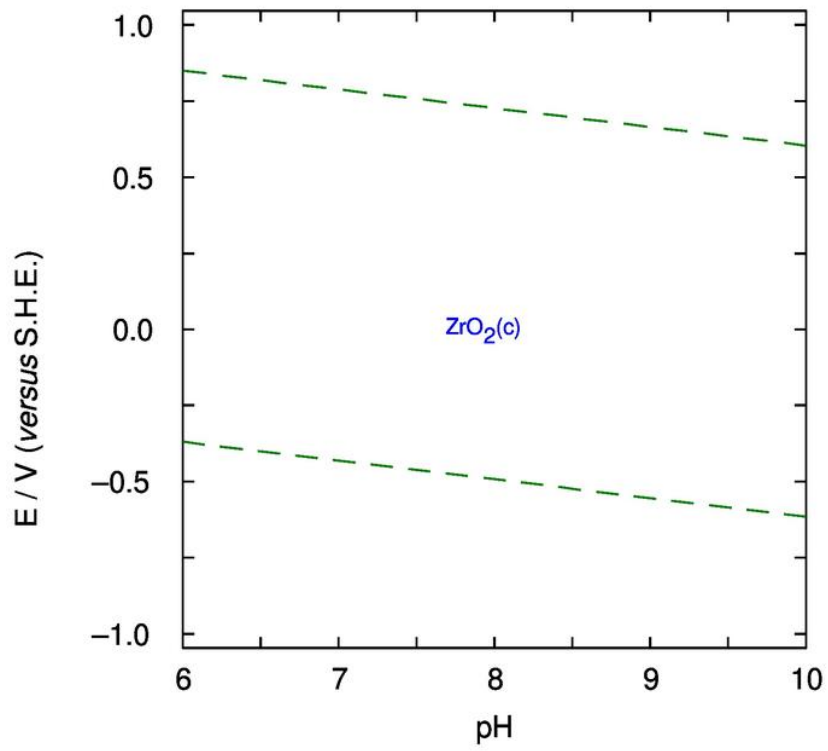

## Se



Supplement: pnas.1804543115.sd01.pdf [file pnas.1804543115.sd01.pdf]
